# Supplementary material for: Systematic comparison between methods for the detection of influential spreaders in complex networks
Source: Springer Nature journal article supplement (doi:10.1038/s41598-019-51209-6), 2019-10-22
Supplement: 41598_2019_51209_MOESM1_ESM.pdf [file 41598_2019_51209_MOESM1_ESM.pdf]

# 1 Table of Networks in the Corpus

| Network              | Type           | N    | E      | $p_c$ | Ref.         | url |
|----------------------|----------------|------|--------|-------|--------------|-----|
| Political books      | information    | 105  | 441    | 0.100 | [1]          | url |
| College football     | social         | 115  | 613    | 0.134 | [2]          | url |
| S208                 | technological  | 122  | 189    | 0.466 | [3]          | url |
| High school, 2011    | social         | 126  | 1709   | 0.038 | [4]          | url |
| Bay Dry              | biological     | 128  | 2106   | 0.030 | [5, 6]       | url |
| Bay Wet              | biological     | 128  | 2075   | 0.031 | [6]          | url |
| Radoslaw Email       | social         | 167  | 3250   | 0.020 | [7, 6]       | url |
| High school, 2012    | social         | 180  | 2220   | 0.044 | [4]          | url |
| Little Rock Lake     | biological     | 183  | 2434   | 0.030 | [8, 6]       | url |
| Jazz                 | social         | 198  | 2742   | 0.031 | [9]          | url |
| S420                 | technological  | 252  | 399    | 0.451 | [3]          | url |
| C. Elegans, neural   | biological     | 297  | 2148   | 0.045 | [10]         | url |
| Network Science      | social         | 379  | 914    | 0.398 | [11]         | url |
| Dublin               | social         | 410  | 2765   | 0.078 | [12, 6]      | url |
| US Air Trasportation | transportation | 500  | 2980   | 0.026 | [13]         | url |
| S838                 | technological  | 512  | 819    | 0.349 | [3]          | url |
| Yeast, transcription | biological     | 662  | 1062   | 0.246 | [14]         | url |
| Caltech              | social         | 762  | 16651  | 0.016 | [15, 16, 17] | url |
| Reed                 | social         | 962  | 18812  | 0.015 | [15, 16, 17] | url |
| Mouse retina         | biological     | 1076 | 90811  | 0.004 | [18, 19]     | url |
| URV email            | social         | 1133 | 5451   | 0.056 | [20]         | url |
| Political blogs      | information    | 1222 | 16714  | 0.015 | [1]          | url |
| Air traffic          | transportation | 1226 | 2408   | 0.163 | [6]          | url |
| Haverford            | social         | 1446 | 59589  | 0.009 | [15, 16, 17] | url |
| Simmons              | social         | 1510 | 32984  | 0.016 | [15, 16, 17] | url |
| Swarthmore           | social         | 1657 | 61049  | 0.009 | [15, 16, 17] | url |
| Petster, hamster     | social         | 1788 | 12476  | 0.025 | [6]          | url |
| UC Irvine            | social         | 1893 | 13835  | 0.023 | [21]         | url |
| Yeast, protein       | biological     | 2224 | 6609   | 0.071 | [22]         | url |
| Amherst              | social         | 2235 | 90954  | 0.008 | [15, 16, 17] | url |
| Bowdoin              | social         | 2250 | 84386  | 0.009 | [15, 16, 17] | url |
| Hamilton             | social         | 2312 | 96393  | 0.008 | [15, 16, 17] | url |
| Adolescent health    | social         | 2539 | 10455  | 0.117 | [23, 19]     | url |
| Trinity              | social         | 2613 | 111996 | 0.008 | [15, 16, 17] | url |

Table 1: Information of the networks analyzed in the study. From left to right we report the name of the network, the type of the network, number of nodes in the giant component, number of edges in the giant component, percolation threshold of the network, references to studies where the network is presented and analyzed, and url where the network can be found.

| <b>Network</b>         | <b>Type</b>    | <b>N</b> | <b>E</b> | <b><math>p_c</math></b> | <b>Ref.</b>  | <b>url</b> |
|------------------------|----------------|----------|----------|-------------------------|--------------|------------|
| USFCA                  | social         | 2672     | 65244    | 0.011                   | [15, 16, 17] | url        |
| Japanese               | information    | 2698     | 7995     | 0.030                   | [3]          | url        |
| Williams               | social         | 2788     | 112985   | 0.008                   | [15, 16, 17] | url        |
| Open flights           | transportation | 2905     | 15645    | 0.020                   | [24, 6]      | url        |
| Oberlin                | social         | 2920     | 89912    | 0.010                   | [15, 16, 17] | url        |
| Smith                  | social         | 2970     | 97133    | 0.010                   | [15, 16, 17] | url        |
| Wellesley              | social         | 2970     | 94899    | 0.010                   | [15, 16, 17] | url        |
| Vassar                 | social         | 3068     | 119161   | 0.009                   | [15, 16, 17] | url        |
| Middlebury             | social         | 3069     | 124607   | 0.008                   | [15, 16, 17] | url        |
| Pepperdine             | social         | 3440     | 152003   | 0.007                   | [15, 16, 17] | url        |
| Colgate                | social         | 3482     | 155043   | 0.008                   | [15, 16, 17] | url        |
| Santa                  | social         | 3578     | 151747   | 0.007                   | [15, 16, 17] | url        |
| Wesleyan               | social         | 3591     | 138034   | 0.009                   | [15, 16, 17] | url        |
| Mich                   | social         | 3745     | 81901    | 0.011                   | [15, 16, 17] | url        |
| Bitcoin Alpha          | social         | 3775     | 14120    | 0.027                   | [25, 26, 27] | url        |
| Bucknell               | social         | 3824     | 158863   | 0.008                   | [15, 16, 17] | url        |
| Brandeis               | social         | 3887     | 137561   | 0.008                   | [15, 16, 17] | url        |
| Howard                 | social         | 4047     | 204850   | 0.006                   | [15, 16, 17] | url        |
| Rice                   | social         | 4083     | 184826   | 0.007                   | [15, 16, 17] | url        |
| GR-QC, 1993-2003       | social         | 4158     | 13422    | 0.091                   | [28, 27]     | url        |
| Tennis                 | social         | 4338     | 81865    | 0.007                   | [29]         | None       |
| Rochester              | social         | 4561     | 161403   | 0.009                   | [15, 16, 17] | url        |
| US Power grid          | technological  | 4941     | 6594     | 0.437                   | [10]         | url        |
| Lehigh                 | social         | 5073     | 198346   | 0.008                   | [15, 16, 17] | url        |
| Johns Hopkins          | social         | 5157     | 186572   | 0.007                   | [15, 16, 17] | url        |
| HT09                   | social         | 5352     | 18481    | 0.025                   | [12]         | url        |
| Wake                   | social         | 5366     | 279186   | 0.006                   | [15, 16, 17] | url        |
| Hep-Th, 1995-1999      | social         | 5835     | 13815    | 0.108                   | [30]         | url        |
| Bitcoin OTC            | social         | 5875     | 21489    | 0.023                   | [25, 26, 27] | url        |
| Reactome               | biological     | 5973     | 145778   | 0.011                   | [31, 6]      | url        |
| Jung                   | technological  | 6120     | 50290    | 0.009                   | [32, 6]      | url        |
| Gnutella, Aug. 8, 2002 | technological  | 6299     | 20776    | 0.046                   | [33, 28, 27] | url        |
| American               | social         | 6370     | 217654   | 0.008                   | [15, 16, 17] | url        |
| MIT                    | social         | 6402     | 251230   | 0.006                   | [15, 16, 17] | url        |
| JDK                    | technological  | 6434     | 53658    | 0.009                   | [6]          | url        |
| William                | social         | 6472     | 266378   | 0.007                   | [15, 16, 17] | url        |
| AS Oregon              | technological  | 6474     | 12572    | 0.036                   | [34, 27]     | url        |
| UChicago               | social         | 6561     | 208088   | 0.008                   | [15, 16, 17] | url        |
| Princeton              | social         | 6575     | 293307   | 0.007                   | [15, 16, 17] | url        |
| Carnegie               | social         | 6621     | 249959   | 0.007                   | [15, 16, 17] | url        |
| Tufts                  | social         | 6672     | 249722   | 0.008                   | [15, 16, 17] | url        |
| UC                     | social         | 6810     | 155320   | 0.010                   | [15, 16, 17] | url        |

Table 2: Continuation of Table 1

| <b>Network</b>          | <b>Type</b>   | <b>N</b> | <b>E</b> | <b><math>p_c</math></b> | <b>Ref.</b>  | <b>url</b> |
|-------------------------|---------------|----------|----------|-------------------------|--------------|------------|
| Wikipedia elections     | social        | 7066     | 100736   | 0.008                   | [35, 36, 27] | url        |
| English                 | information   | 7377     | 44205    | 0.011                   | [3]          | url        |
| Gnutella, Aug. 9, 2002  | technological | 8104     | 26008    | 0.045                   | [33, 28, 27] | url        |
| French                  | information   | 8308     | 23832    | 0.022                   | [3]          | url        |
| Hep-Th, 1993-2003       | social        | 8638     | 24806    | 0.072                   | [28, 27]     | url        |
| Gnutella, Aug. 6, 2002  | technological | 8717     | 31525    | 0.065                   | [33, 28, 27] | url        |
| Gnutella, Aug. 5, 2002  | technological | 8842     | 31837    | 0.056                   | [33, 28, 27] | url        |
| PGP                     | social        | 10680    | 24316    | 0.064                   | [37]         | url        |
| Gnutella, Aug. 4, 2002  | technological | 10876    | 39994    | 0.076                   | [33, 28, 27] | url        |
| Hep-Ph, 1993-2003       | social        | 11204    | 117619   | 0.005                   | [28, 27]     | url        |
| Spanish 1               | information   | 11558    | 43050    | 0.012                   | [3]          | url        |
| DBLP, citations         | information   | 12495    | 49563    | 0.032                   | [38, 6]      | url        |
| Spanish 2               | information   | 12643    | 55019    | 0.012                   | [6]          | url        |
| Cond-Mat, 1995-1999     | social        | 13861    | 44619    | 0.064                   | [30, 27]     | url        |
| Astrophysics            | social        | 14845    | 119652   | 0.018                   | [30]         | url        |
| AstroPhys, 1993-2003    | social        | 17903    | 196972   | 0.013                   | [28, 27]     | url        |
| Marvel                  | social        | 19365    | 96616    | 0.019                   | [39, 19]     | url        |
| Cond-Mat, 1993-2003     | social        | 21363    | 91286    | 0.037                   | [28, 27]     | url        |
| Gnutella, Aug. 25, 2002 | technological | 22663    | 54693    | 0.115                   | [33, 28, 27] | url        |
| Internet                | technological | 22963    | 48436    | 0.019                   | None         | url        |
| Thesaurus               | information   | 23132    | 297094   | 0.011                   | [40, 6]      | url        |
| Cora                    | information   | 23166    | 89157    | 0.045                   | [41, 6]      | url        |
| AS Caida                | technological | 26475    | 53381    | 0.021                   | [34, 27]     | url        |
| Gnutella, Aug. 24, 2002 | technological | 26498    | 65359    | 0.106                   | [33, 28, 27] | url        |

Table 3: Continuation of Table 1

## 2 $T=0.05$

### 2.1 Relative size of seed set vs relative size of the outbreak

#### 2.1.1 Subcritical Regime

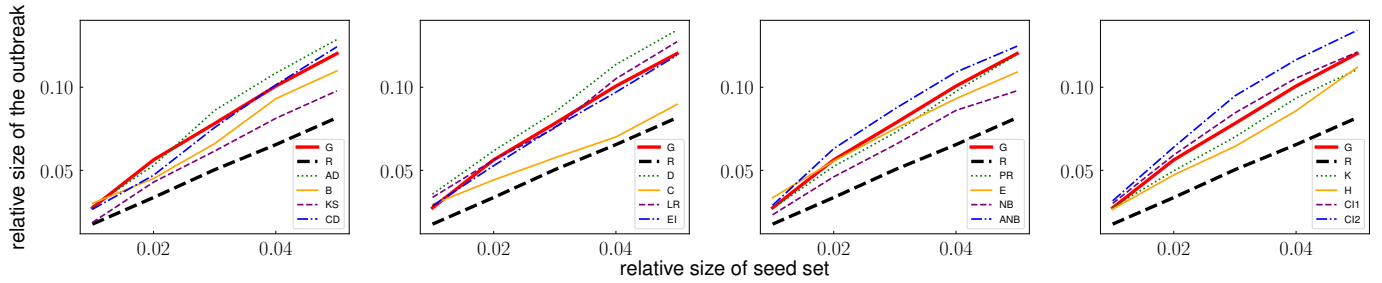

Figure 1: Political books -  $p=0.5p_c$

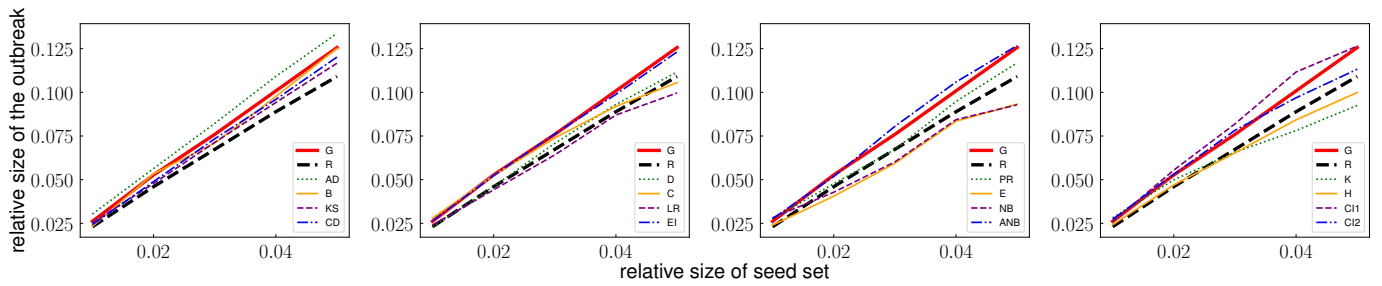

Figure 2: College football -  $p=0.5p_c$

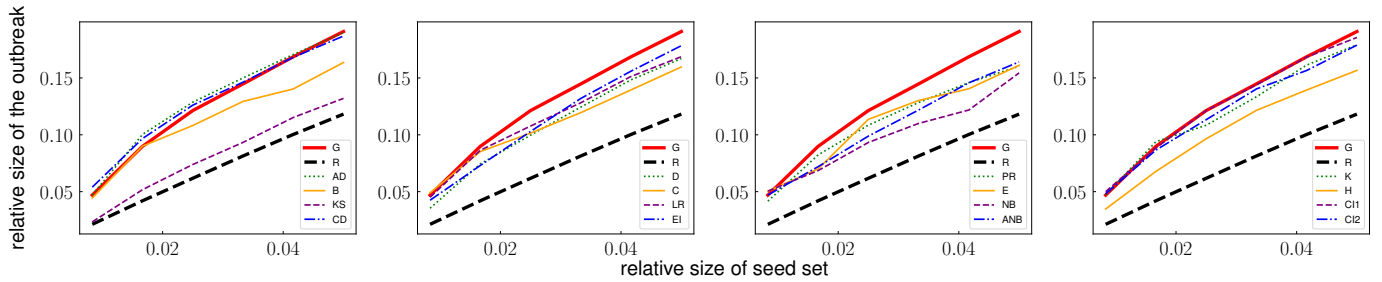

Figure 3: S208 -  $p=0.5p_c$

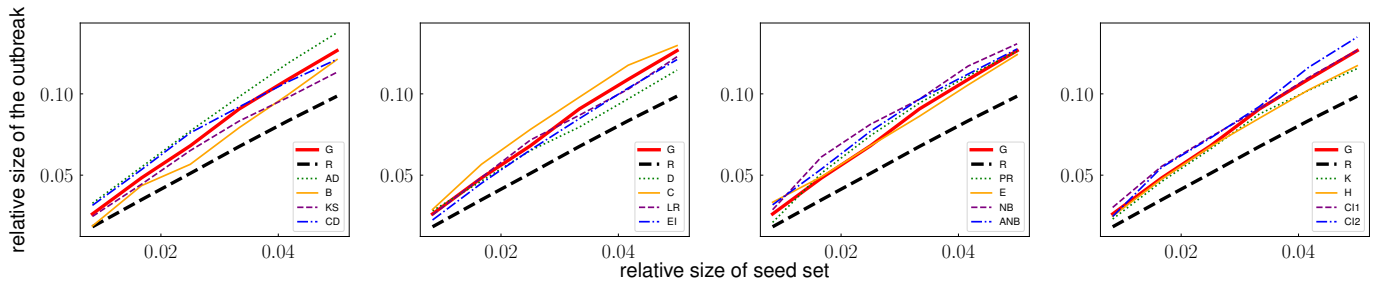

Figure 4: High school, 2011 -  $p=0.5p_c$

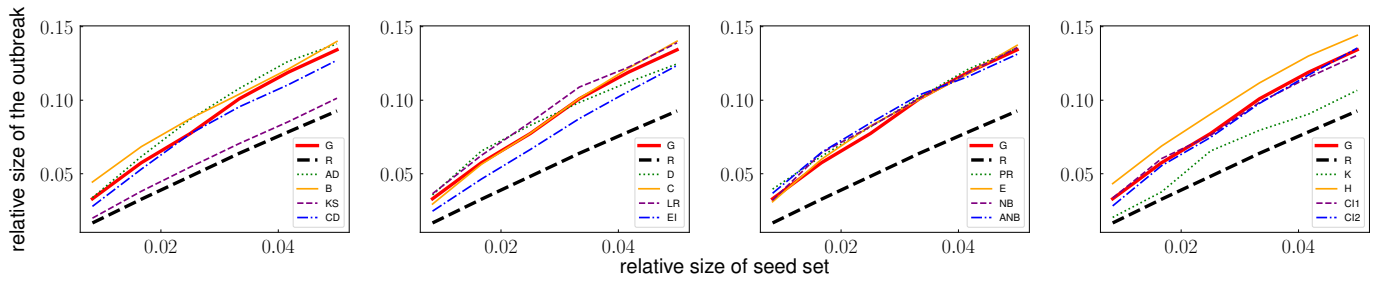

Figure 5: Bay Dry -  $p=0.5p_c$

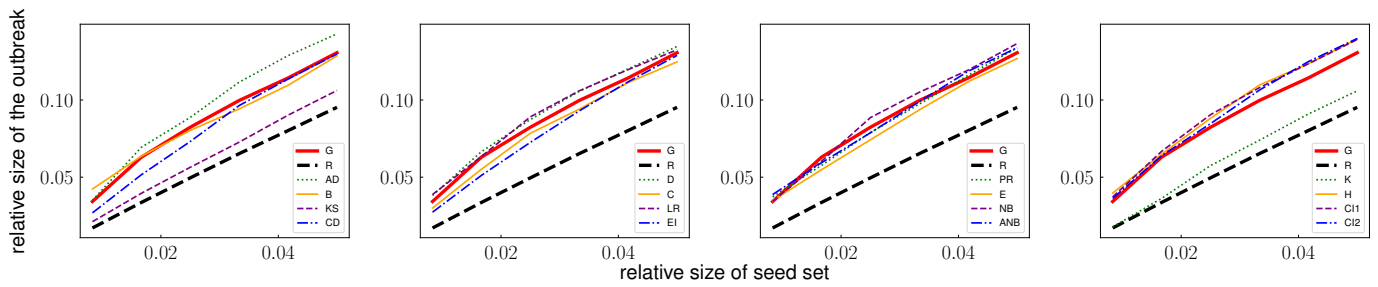

Figure 6: Bay Wet -  $p=0.5p_c$

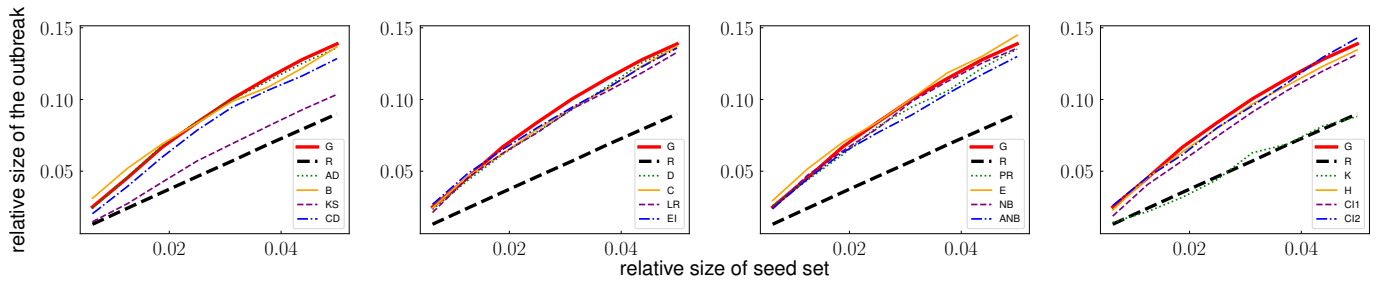

Figure 7: Radoslaw Email -  $p=0.5p_c$

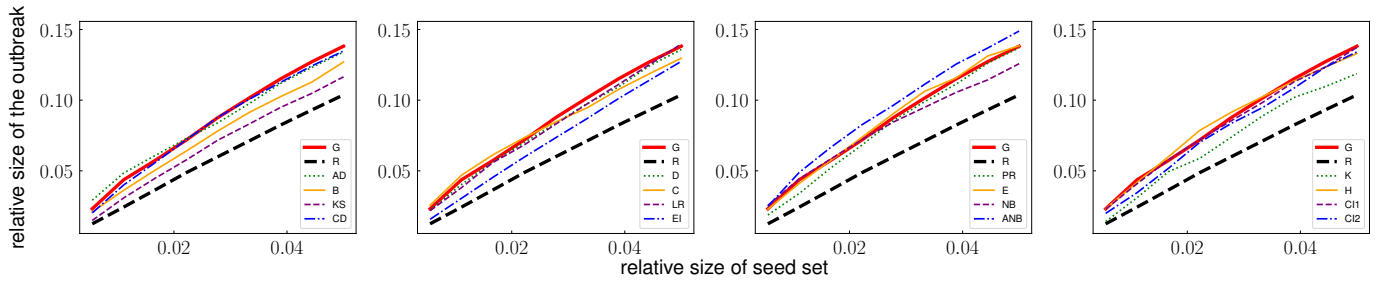

Figure 8: High school, 2012 -  $p=0.5p_c$

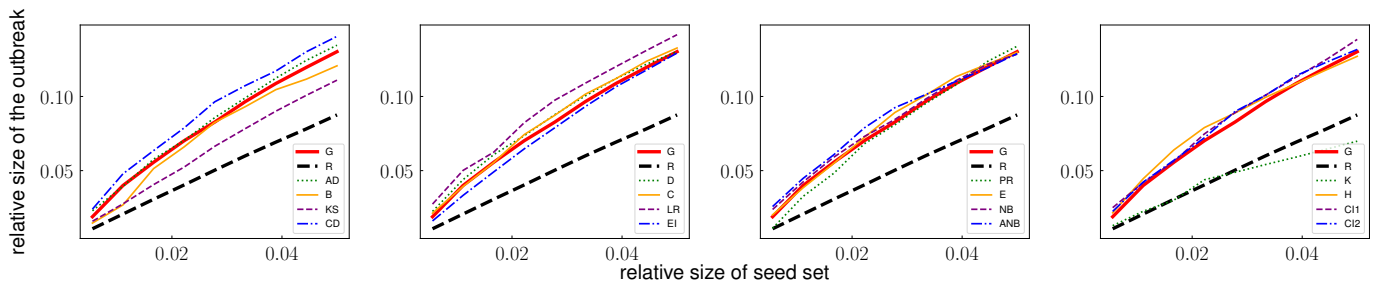

Figure 9: Little Rock Lake -  $p=0.5p_c$

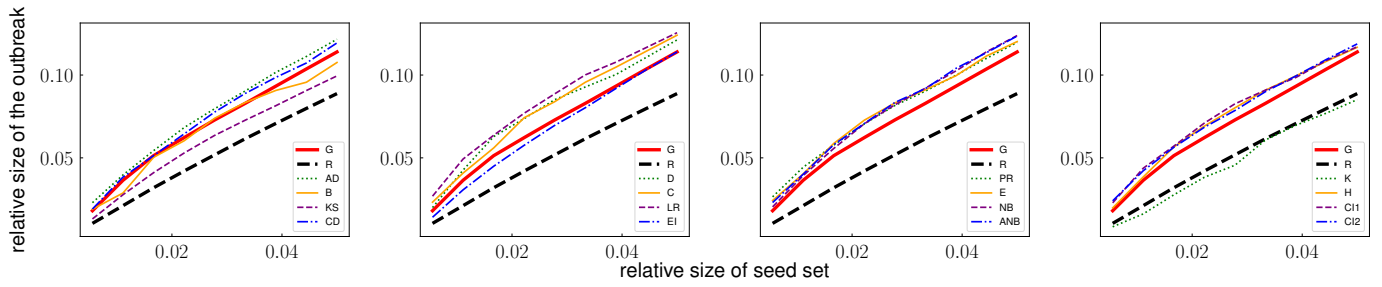

Figure 10: Jazz -  $p=0.5p_c$

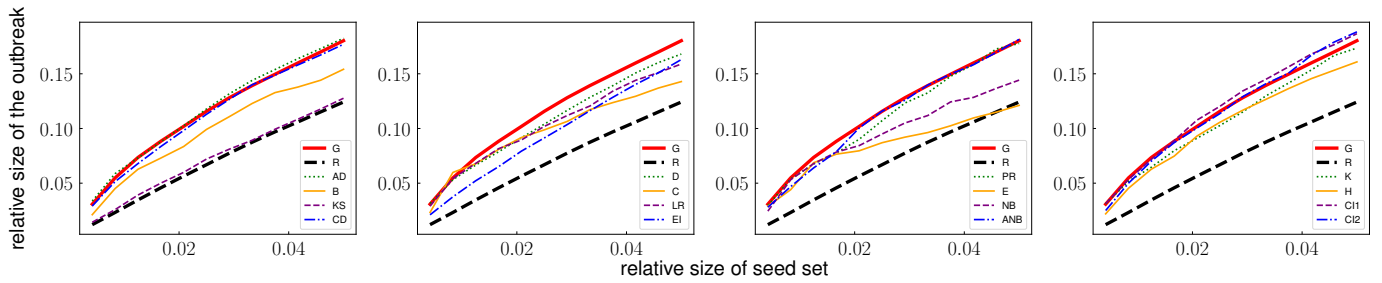

Figure 11: S420 -  $p=0.5p_c$

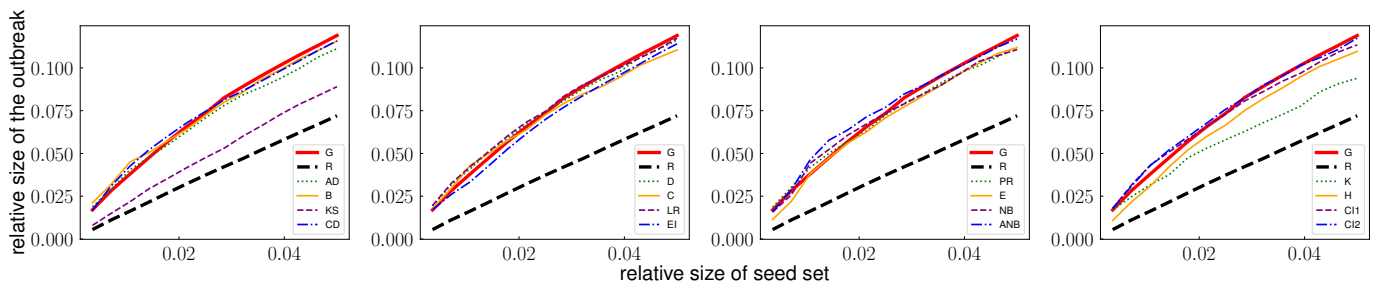

Figure 12: C. Elegans, neural -  $p=0.5p_c$

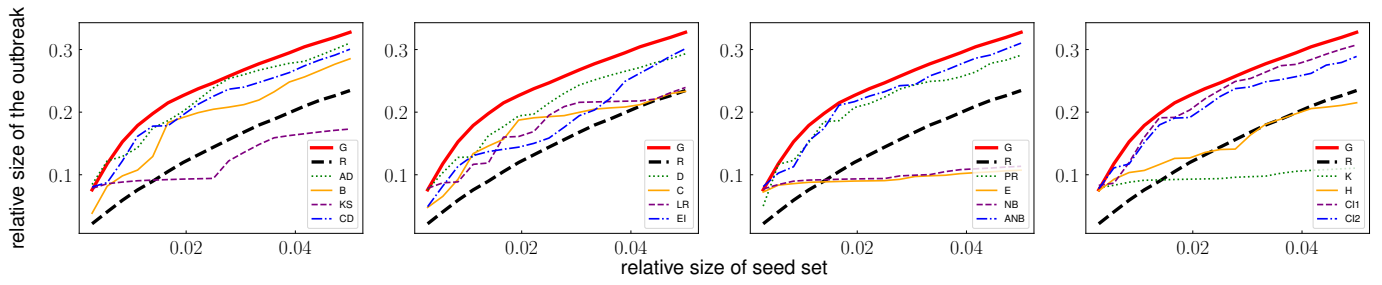

Figure 13: Network Science -  $p=0.5p_c$

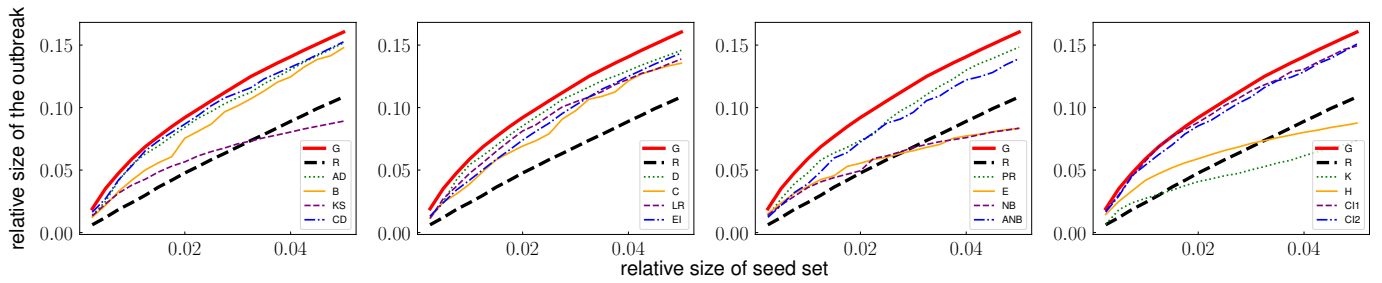

Figure 14: Dublin -  $p=0.5p_c$

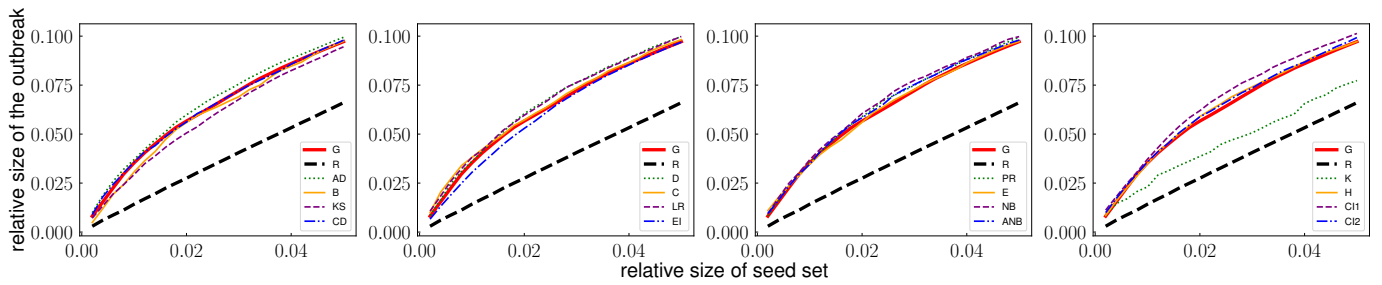

Figure 15: US Air Transportation -  $p=0.5p_c$



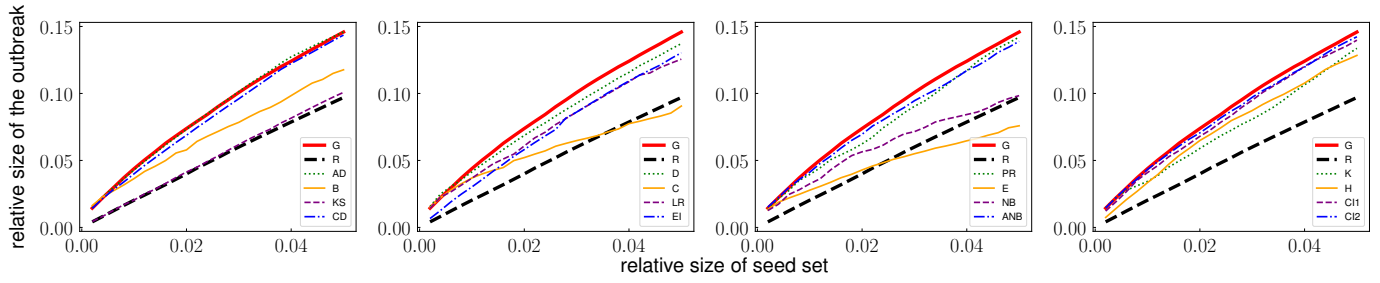

Figure 16: S838 -  $p=0.5p_c$

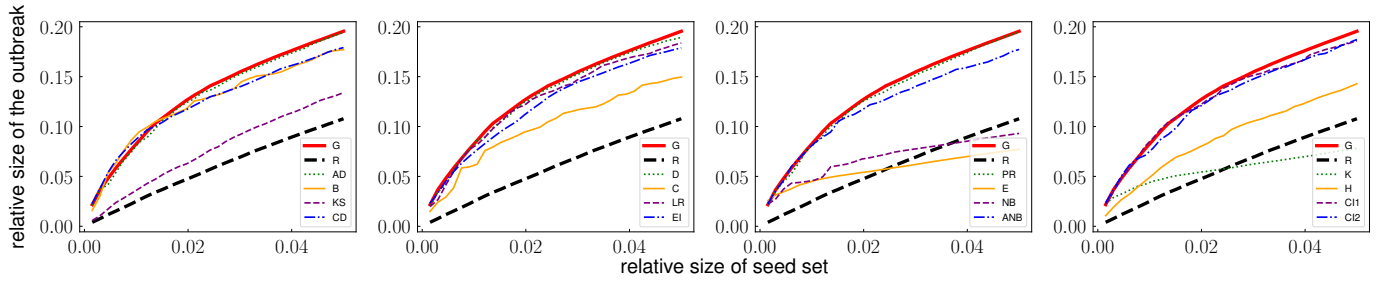

Figure 17: Yeast, transcription -  $p=0.5p_c$

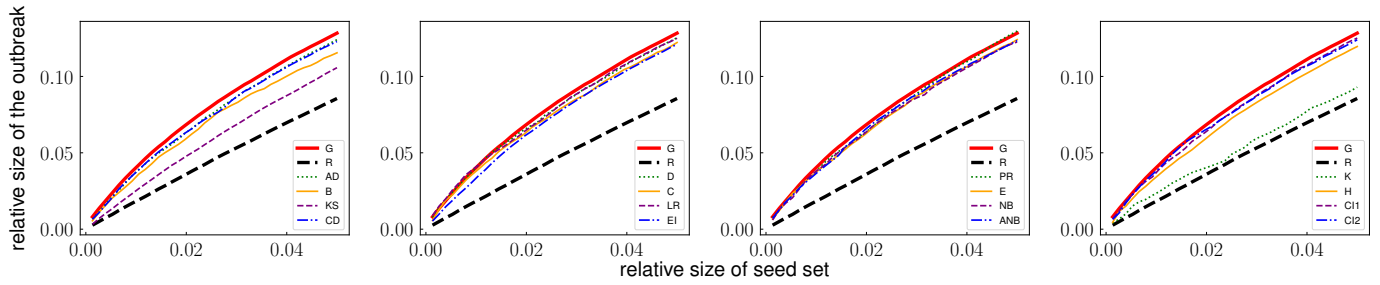

Figure 18: Caltech -  $p=0.5p_c$

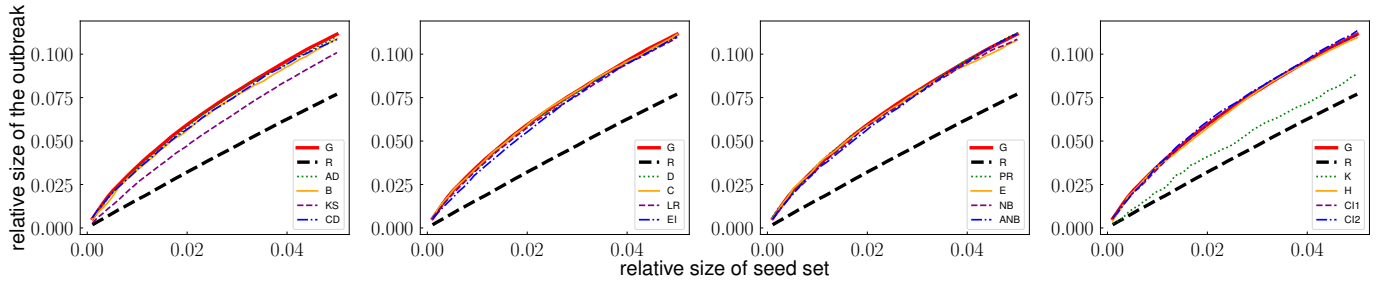

Figure 19: Reed -  $p=0.5p_c$

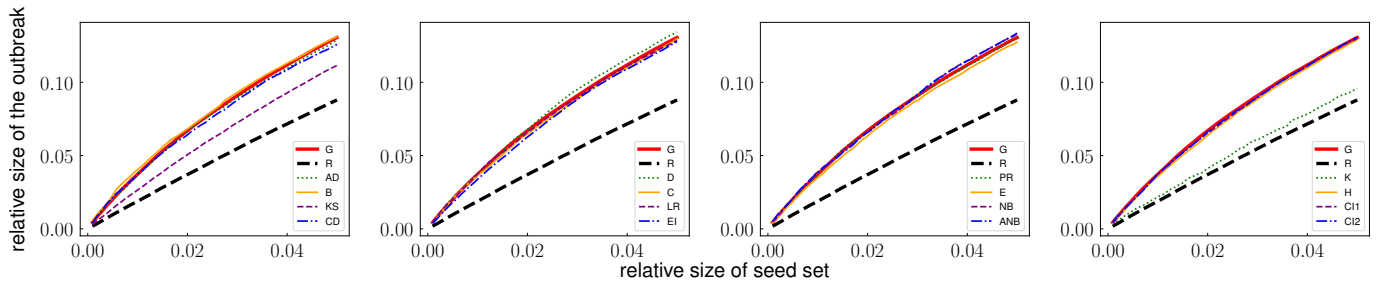

Figure 20: Mouse retina -  $p=0.5p_c$

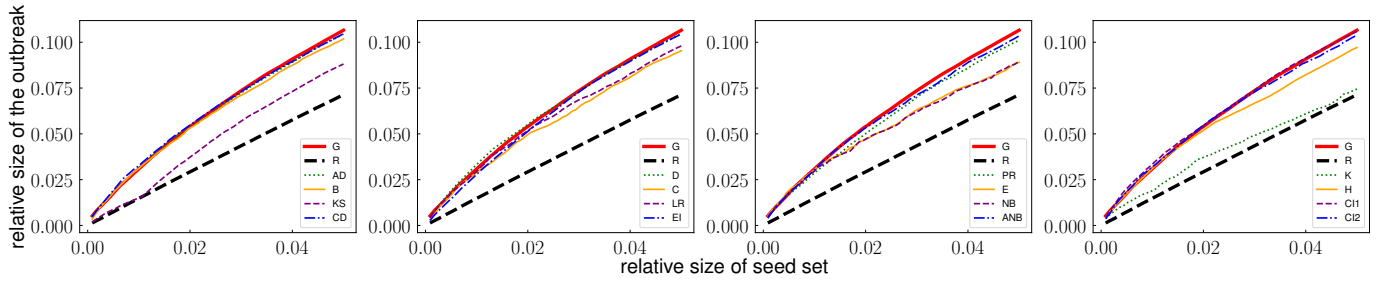

Figure 21: URV email -  $p=0.5p_c$

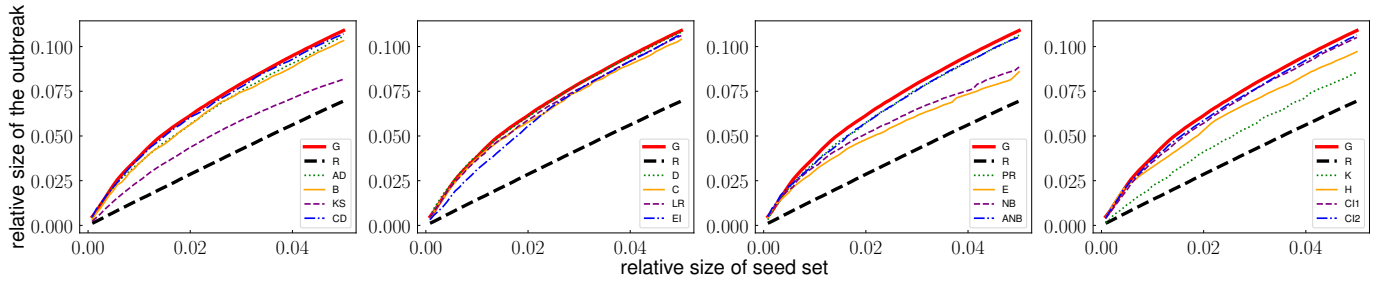

Figure 22: Political blogs -  $p=0.5p_c$

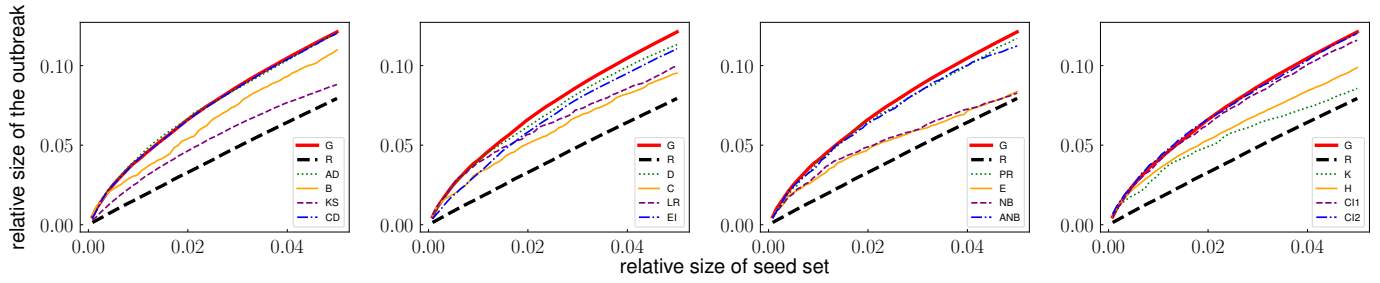

Figure 23: Air traffic -  $p=0.5p_c$

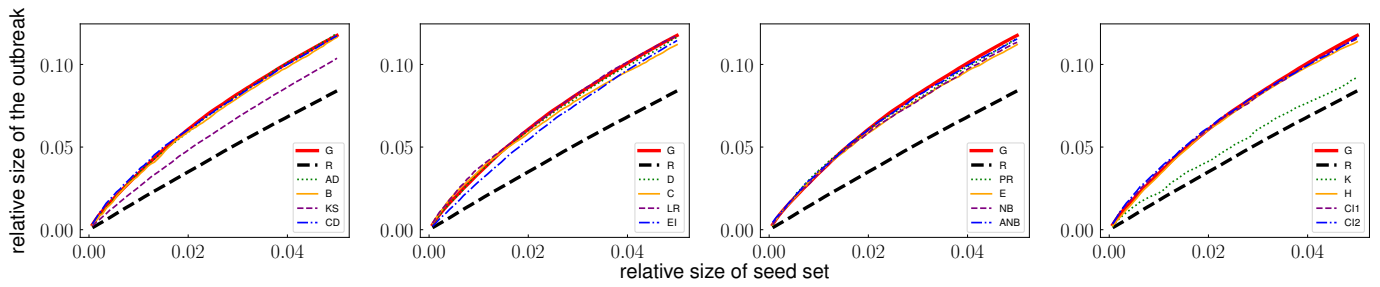

Figure 24: Haverford -  $p=0.5p_c$

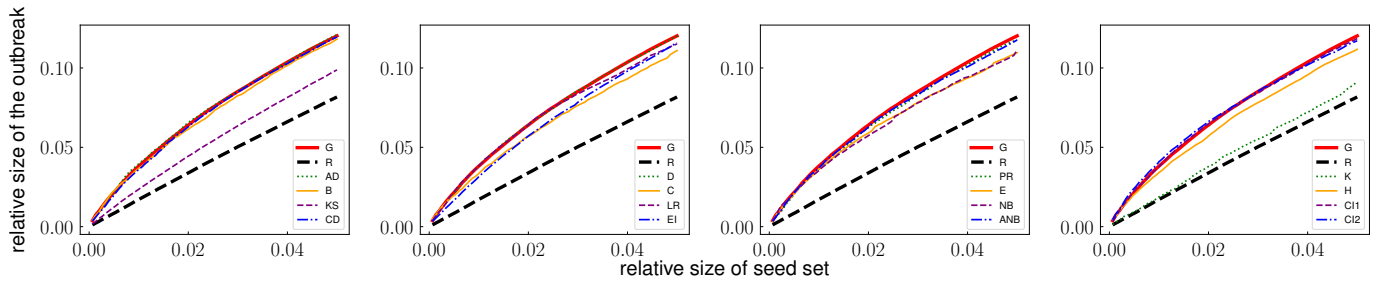

Figure 25: Simmons -  $p=0.5p_c$

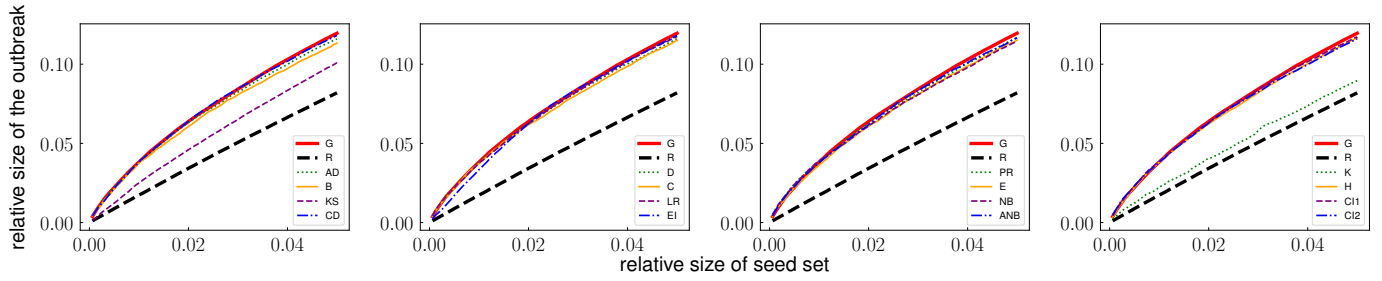

Figure 26: Swarthmore -  $p=0.5p_c$

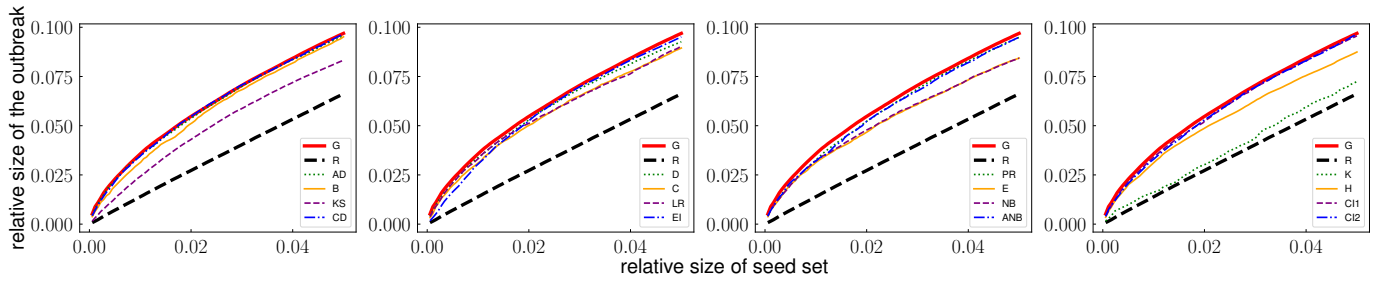

Figure 27: Petster, hamster -  $p=0.5p_c$

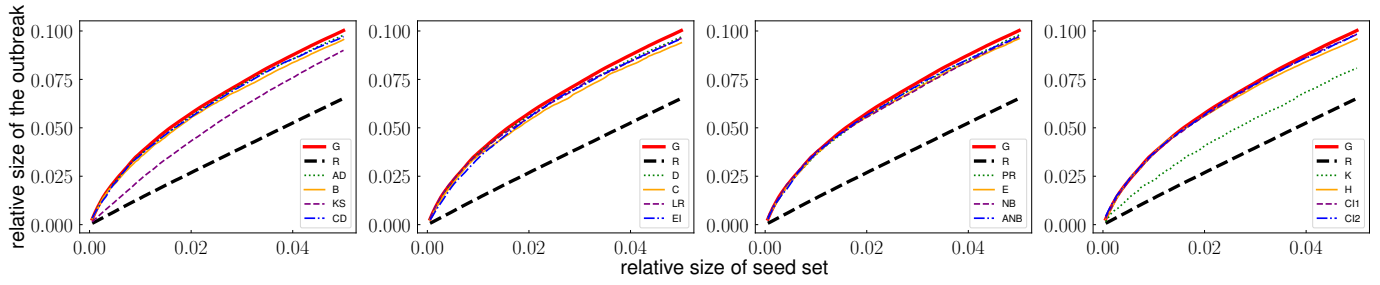

Figure 28: UC Irvine -  $p=0.5p_c$

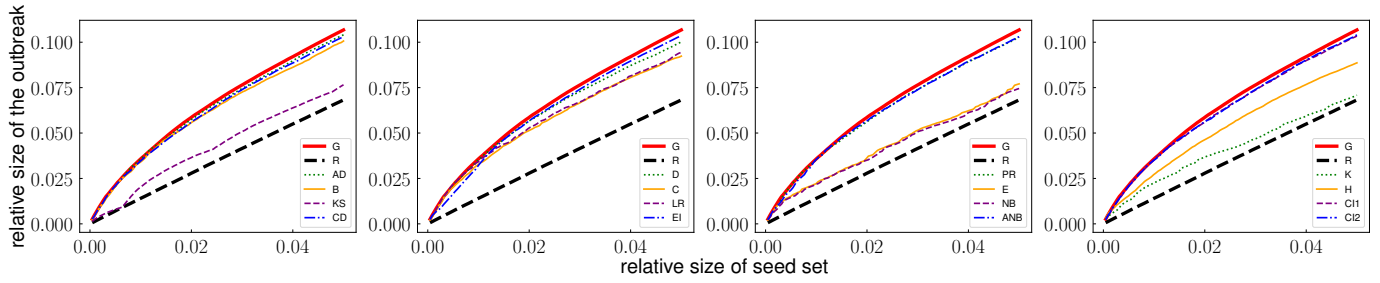

Figure 29: Yeast, protein -  $p=0.5p_c$

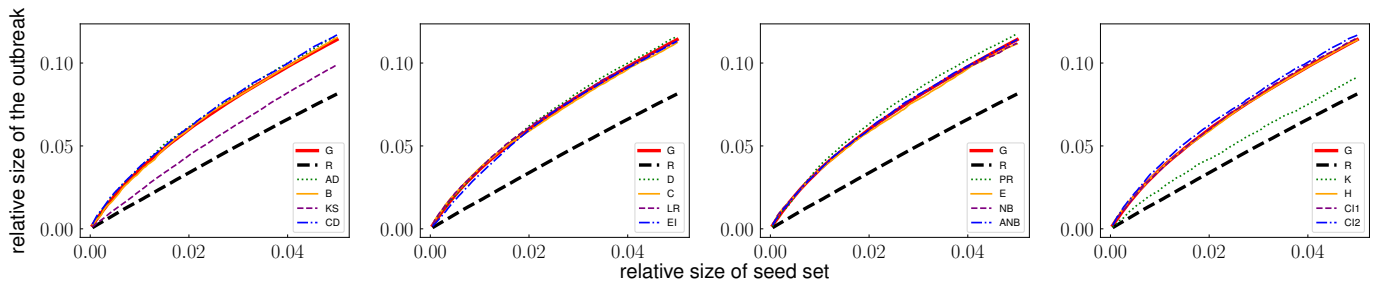

Figure 30: Amherst -  $p=0.5p_c$

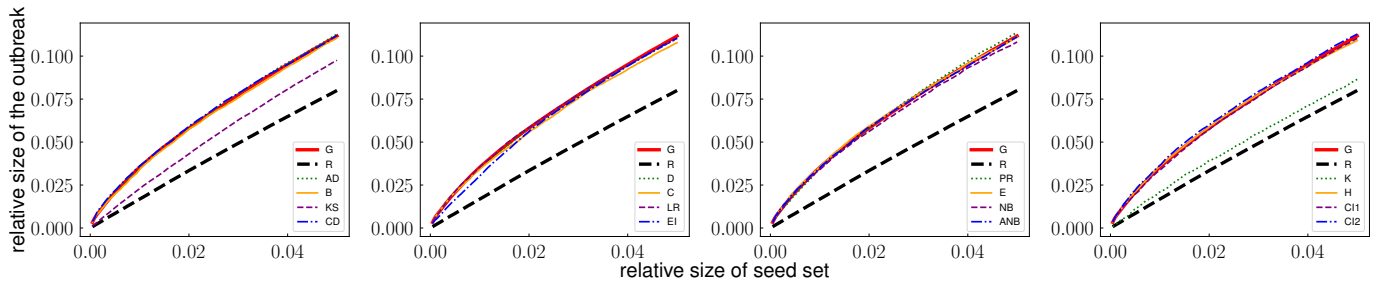

Figure 31: Bowdoin -  $p=0.5p_c$

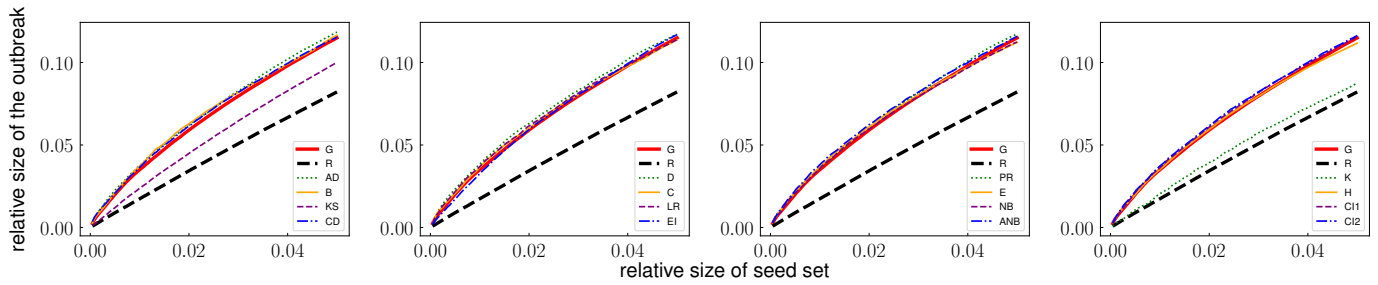

Figure 32: Hamilton -  $p=0.5p_c$

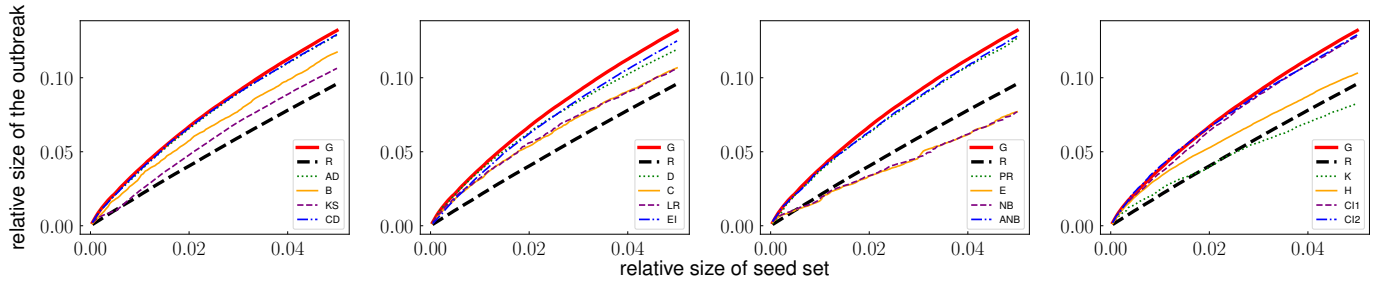

Figure 33: Adolescent health -  $p=0.5p_c$

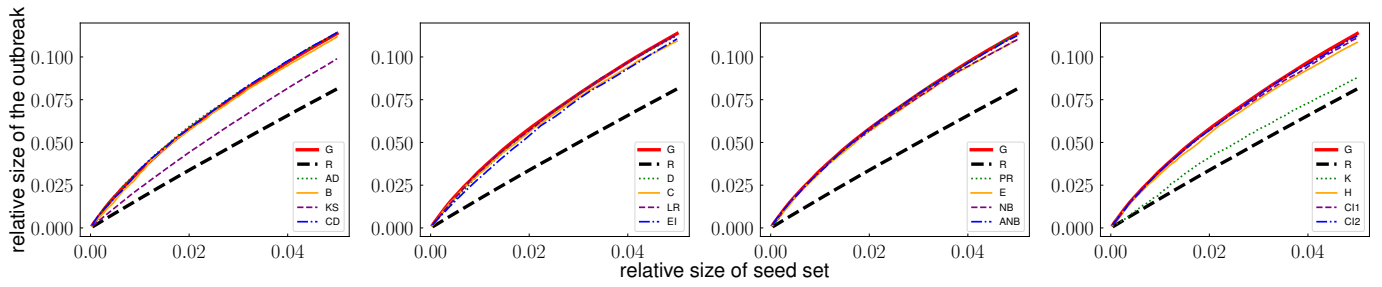

Figure 34: Trinity -  $p=0.5p_c$

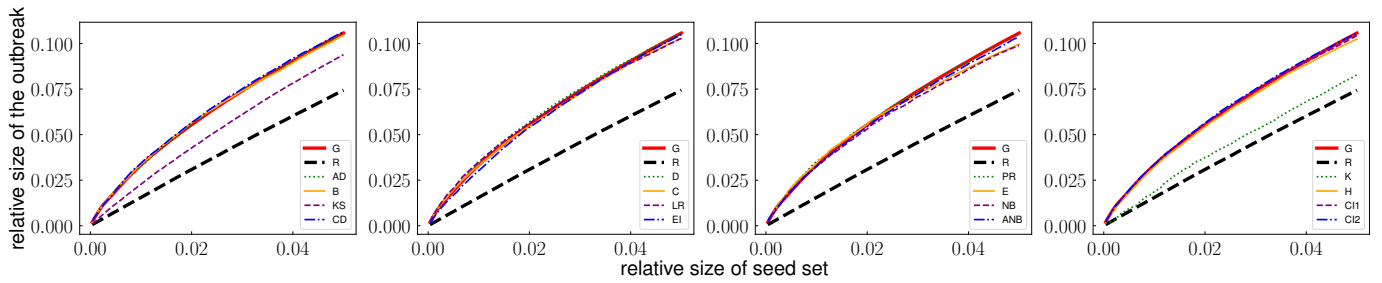

Figure 35: USFCA -  $p=0.5p_c$

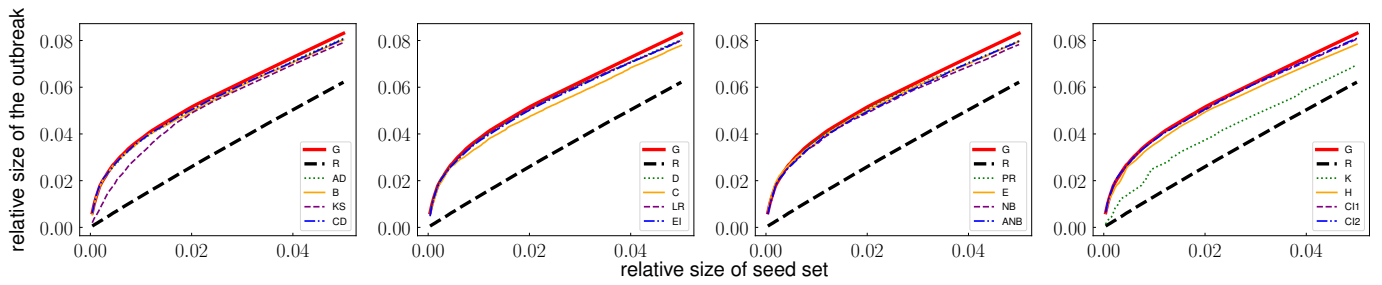

Figure 36: Japanese -  $p=0.5p_c$

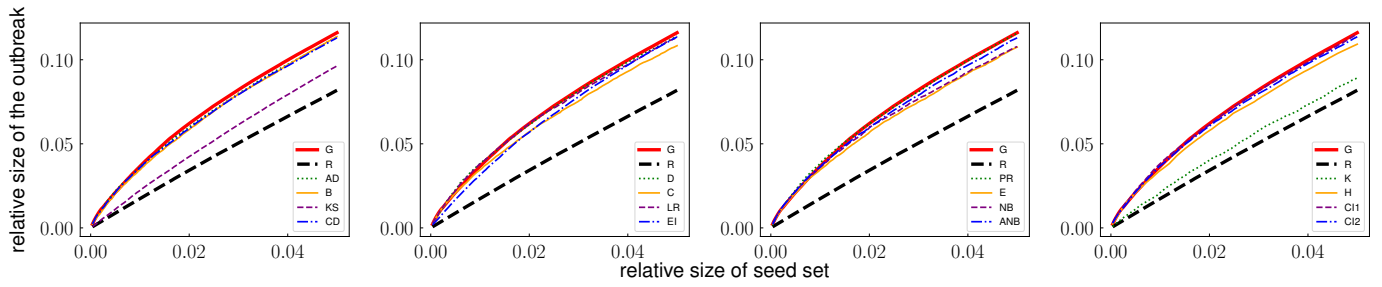

Figure 37: Williams -  $p=0.5p_c$

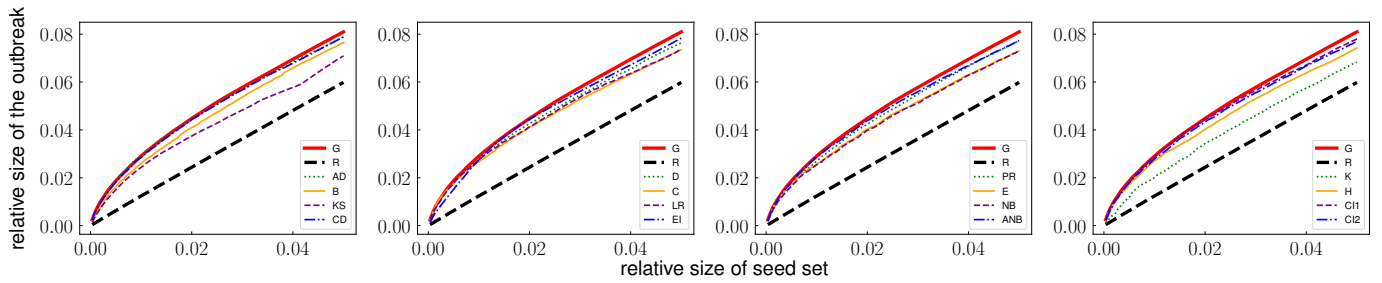

Figure 38: Open flights -  $p=0.5p_c$

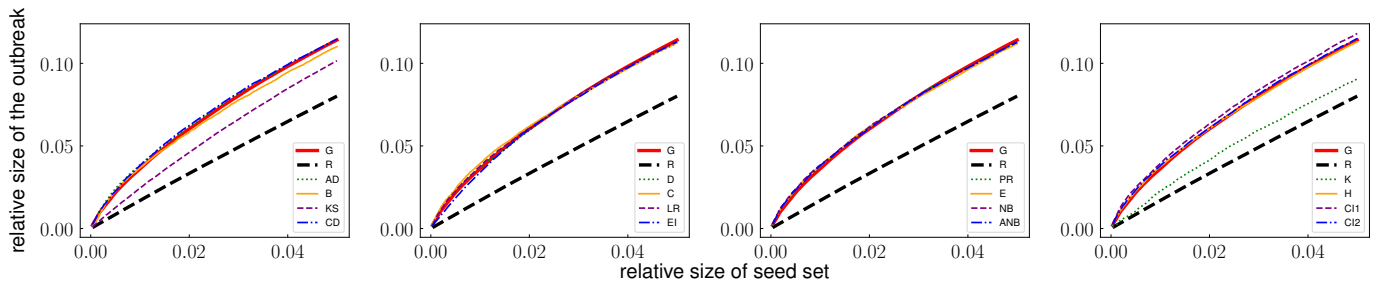

Figure 39: Oberlin -  $p=0.5p_c$



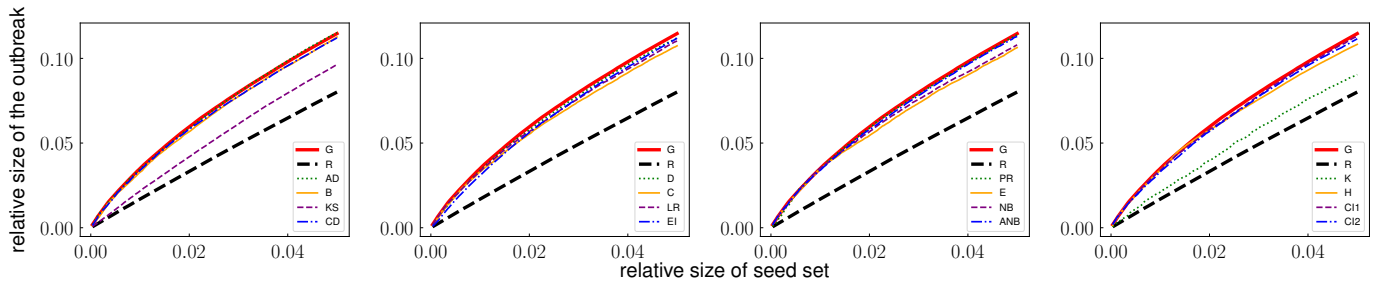

Figure 40: Smith -  $p=0.5p_c$

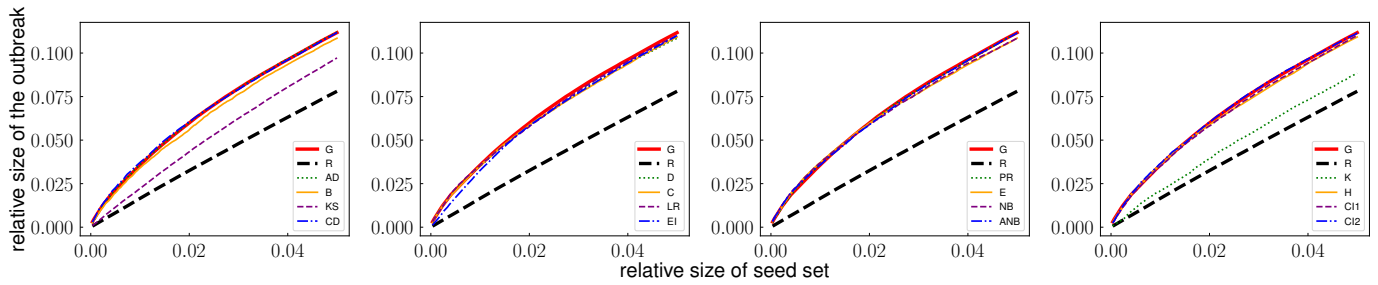

Figure 41: Wellesley -  $p=0.5p_c$

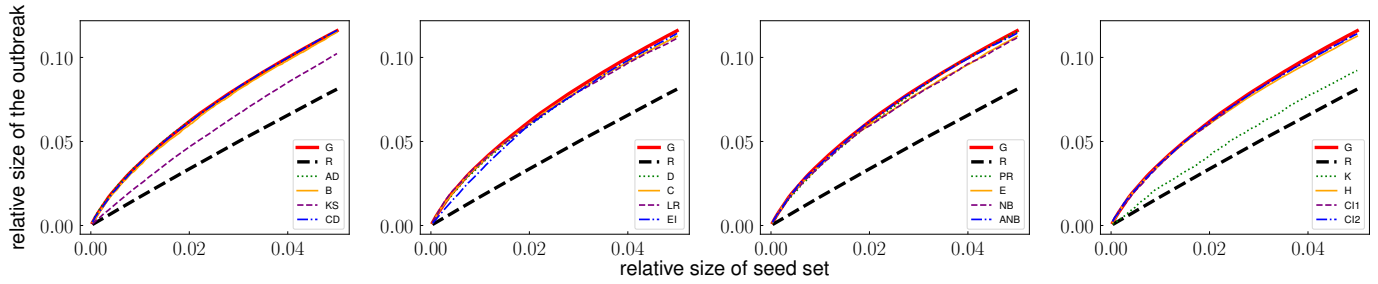

Figure 42: Vassar -  $p=0.5p_c$

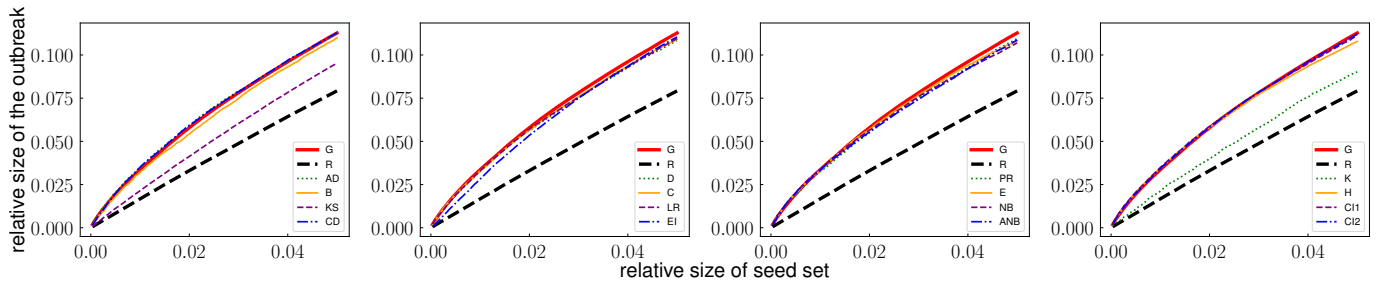

Figure 43: Middlebury -  $p=0.5p_c$

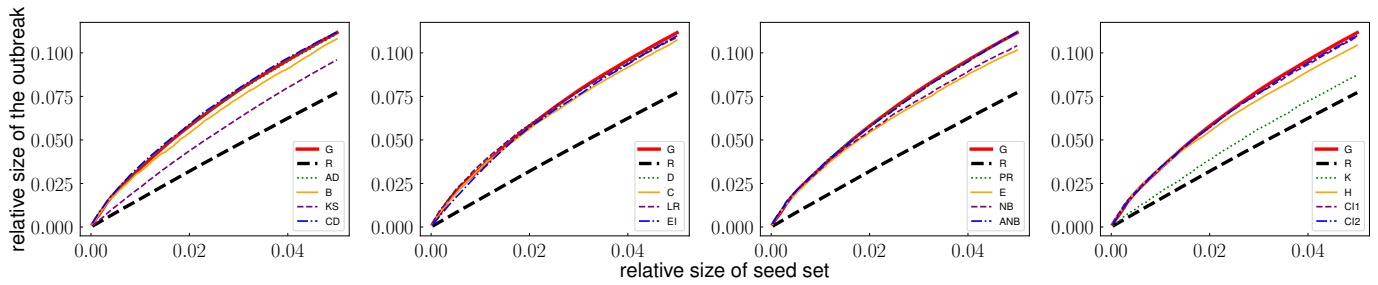

Figure 44: Pepperdine -  $p=0.5p_c$

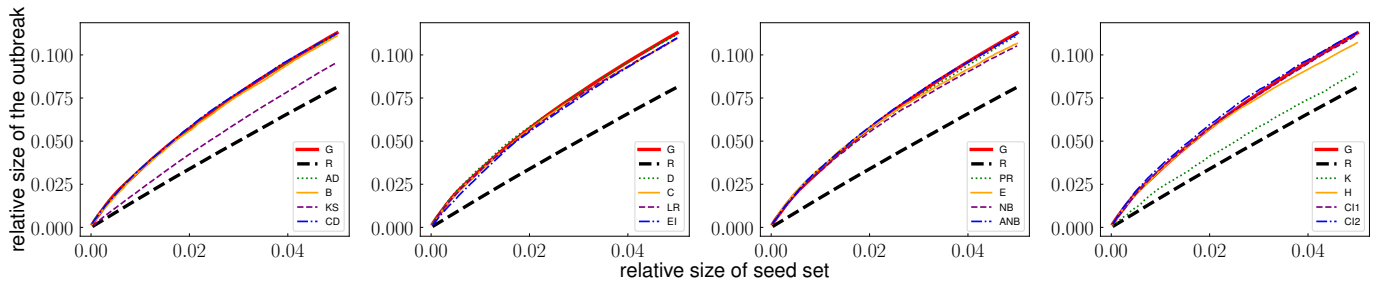

Figure 45: Colgate -  $p=0.5p_c$

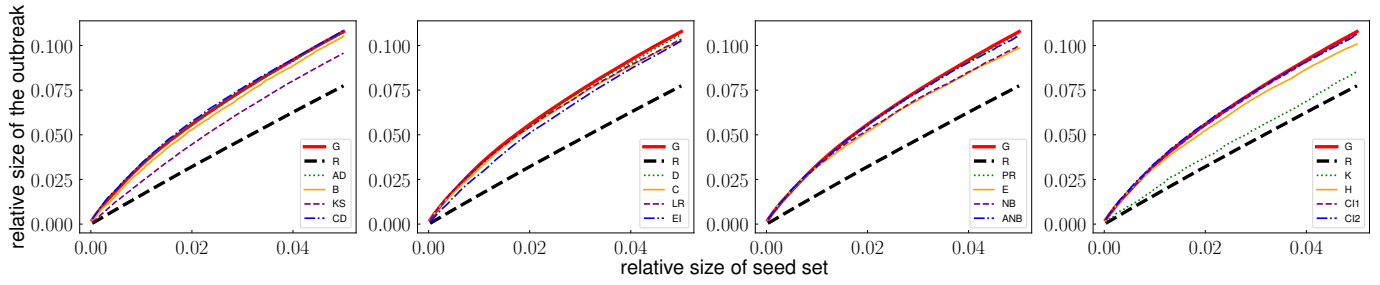

Figure 46: Santa -  $p=0.5p_c$

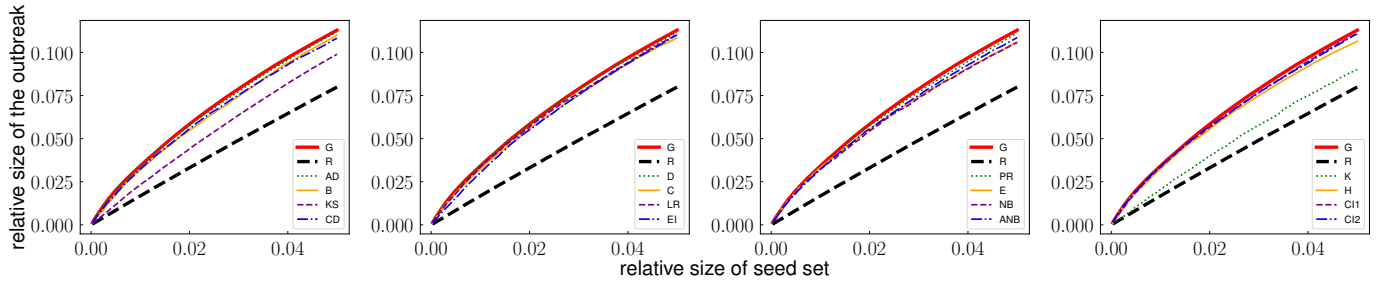

Figure 47: Wesleyan -  $p=0.5p_c$

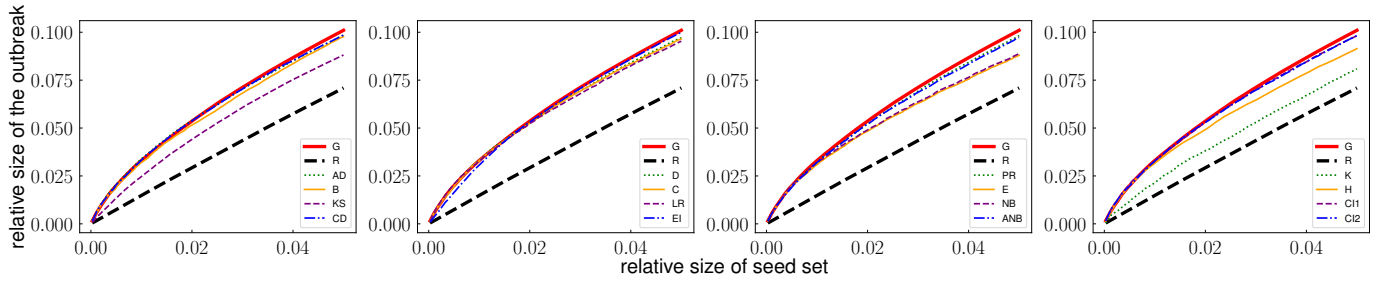

Figure 48: Mich -  $p=0.5p_c$

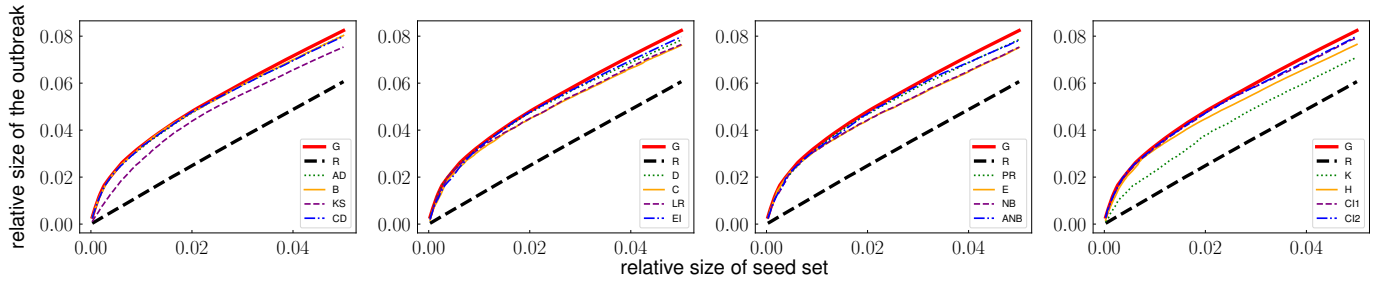

Figure 49: Bitcoin Alpha -  $p=0.5p_c$

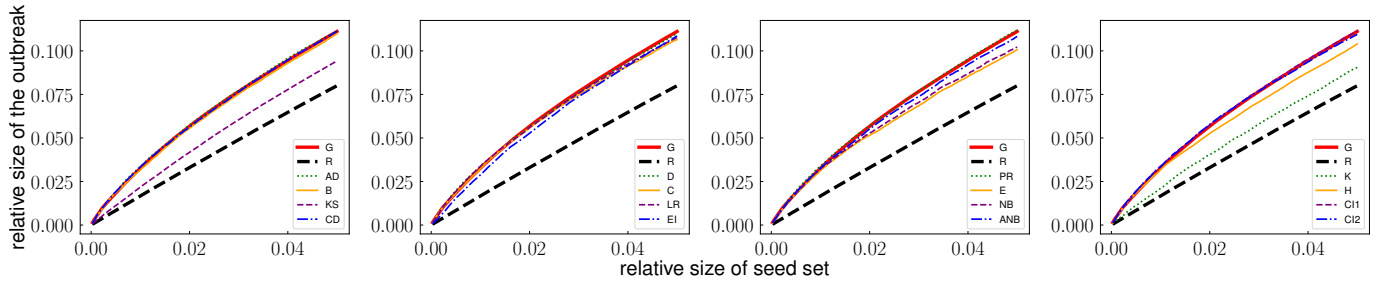

Figure 50: Bucknell -  $p=0.5p_c$

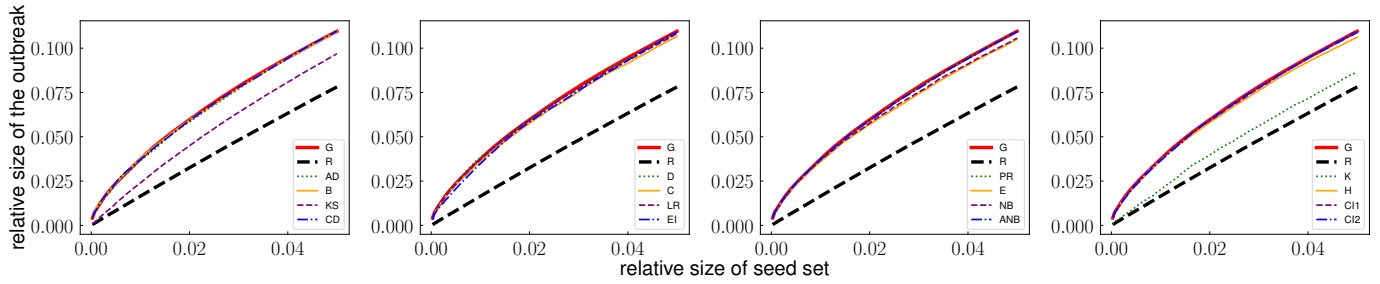

Figure 51: Brandeis -  $p=0.5p_c$

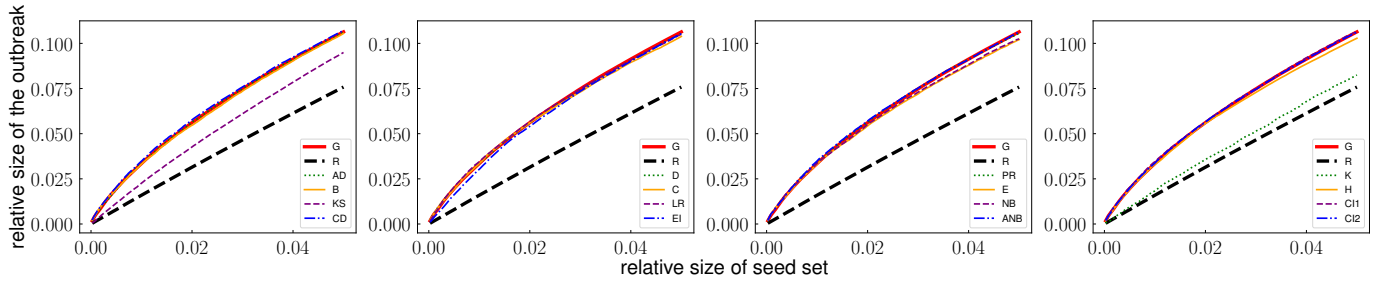

Figure 52: Howard -  $p=0.5p_c$

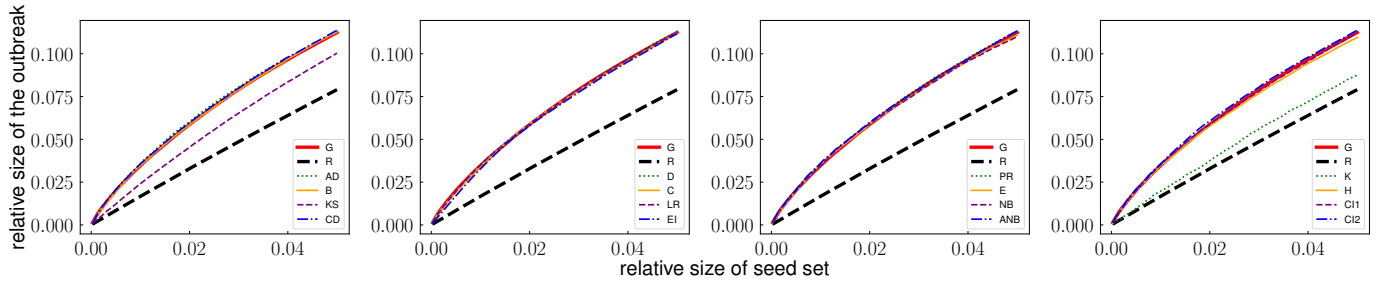

Figure 53: Rice -  $p=0.5p_c$

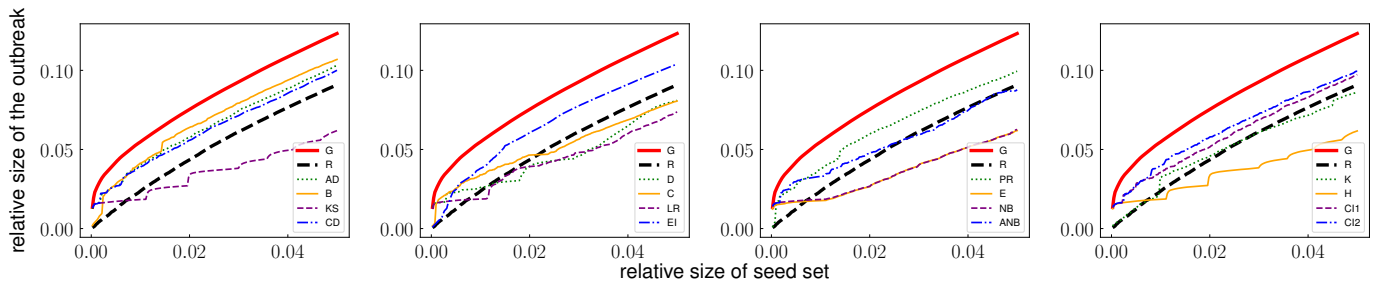

Figure 54: GR-QC, 1993-2003 -  $p=0.5p_c$

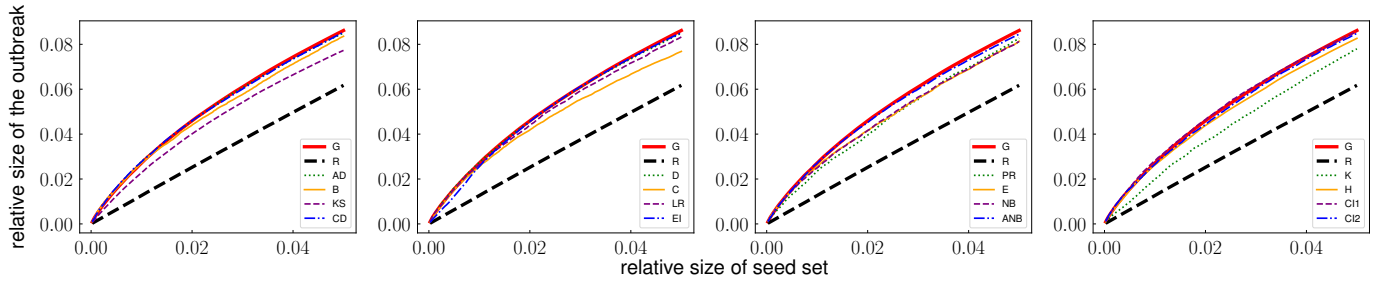

Figure 55: Tennis -  $p=0.5p_c$

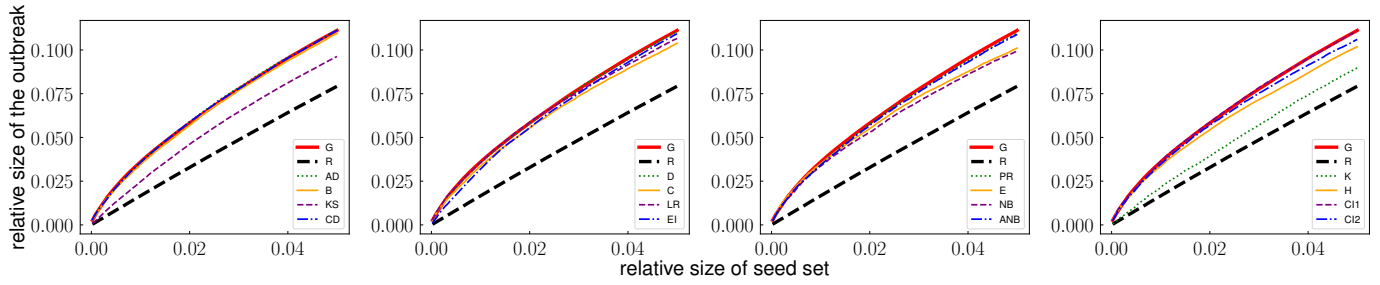

Figure 56: Rochester -  $p=0.5p_c$

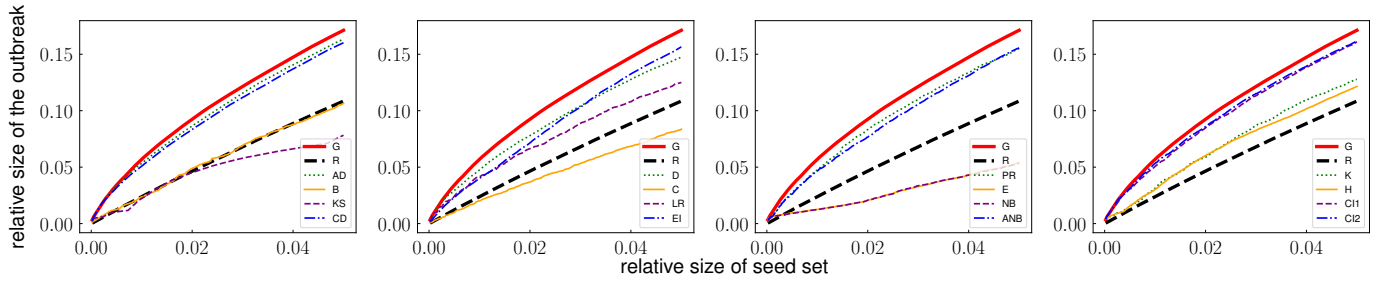

Figure 57: US Power grid -  $p=0.5p_c$

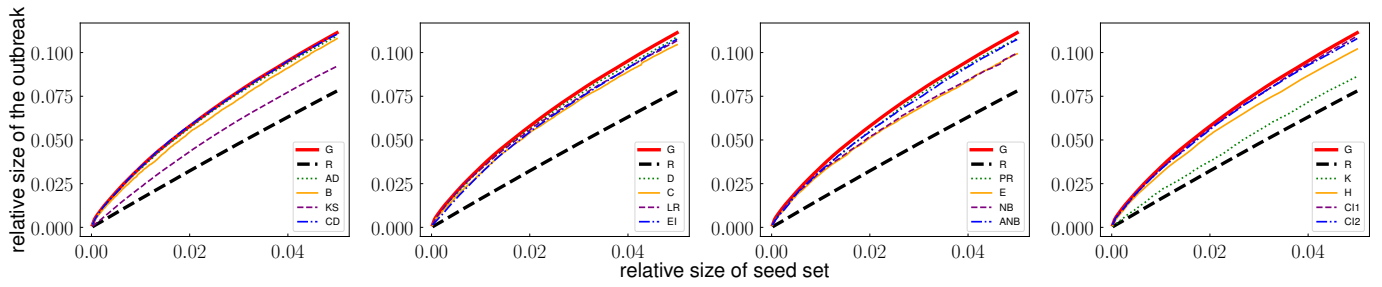

Figure 58: Lehigh -  $p=0.5p_c$

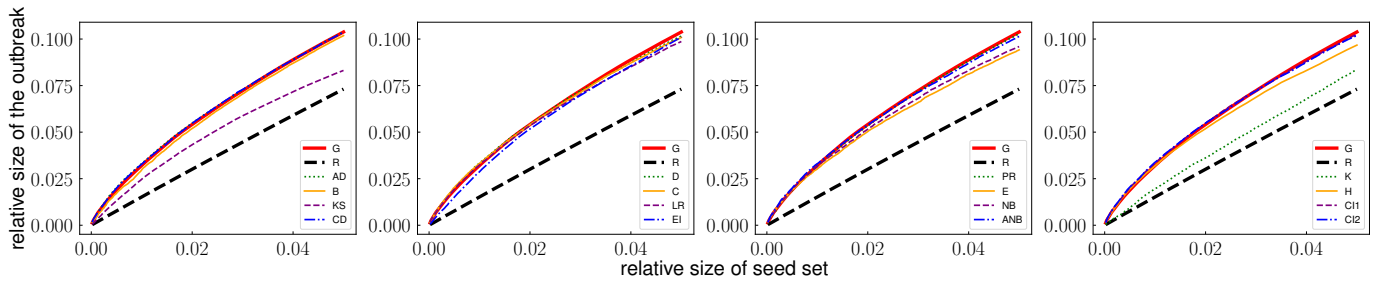

Figure 59: Johns Hopkins -  $p=0.5p_c$

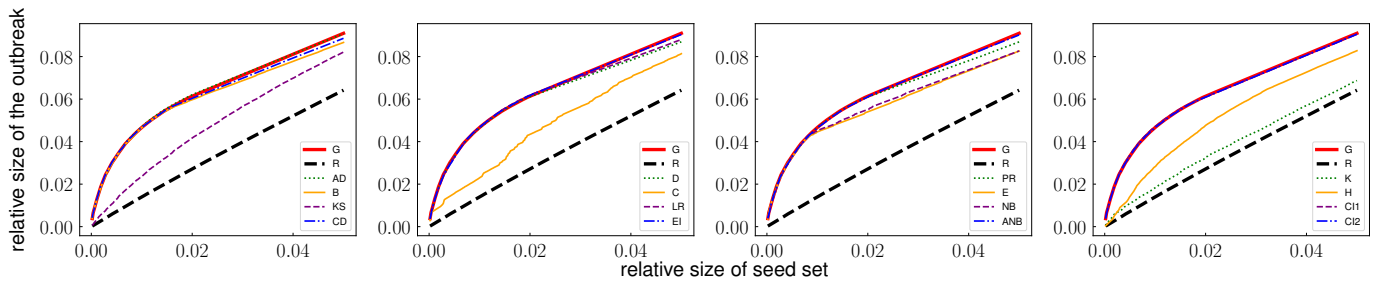

Figure 60: HT09 -  $p=0.5p_c$

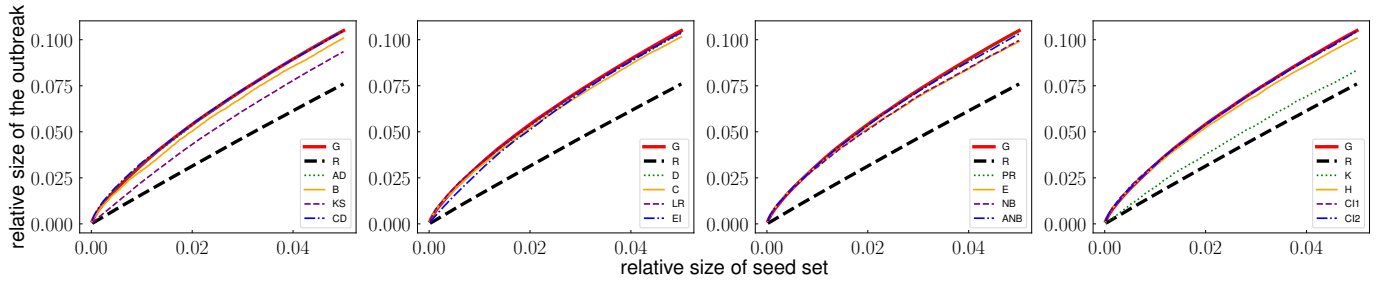

Figure 61: Wake -  $p=0.5p_c$

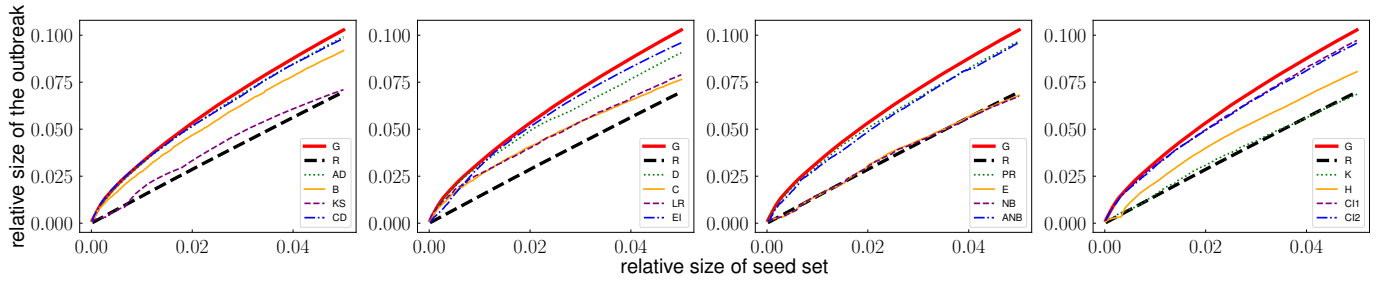

Figure 62: Hep-Th, 1995-1999 -  $p=0.5p_c$

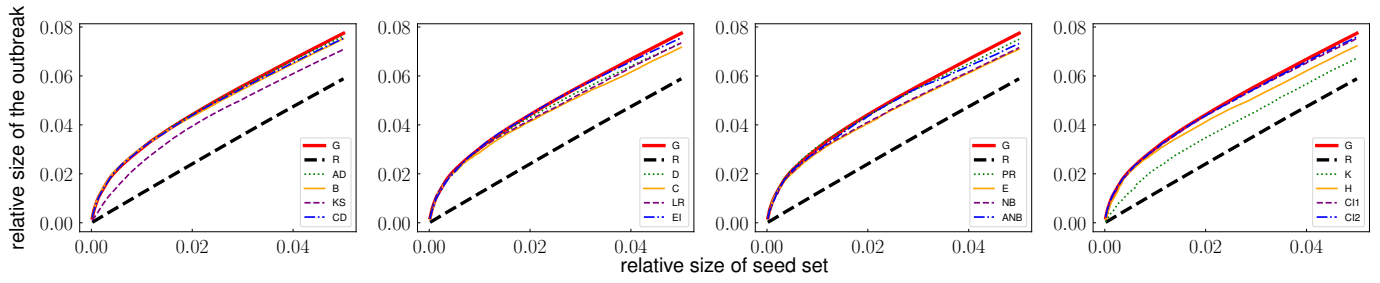

Figure 63: Bitcoin OTC -  $p=0.5p_c$



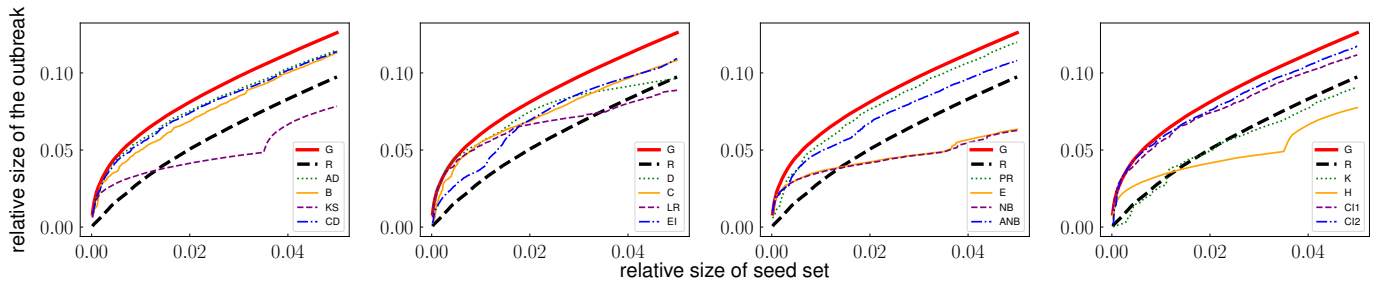

Figure 64: Reactome -  $p=0.5p_c$

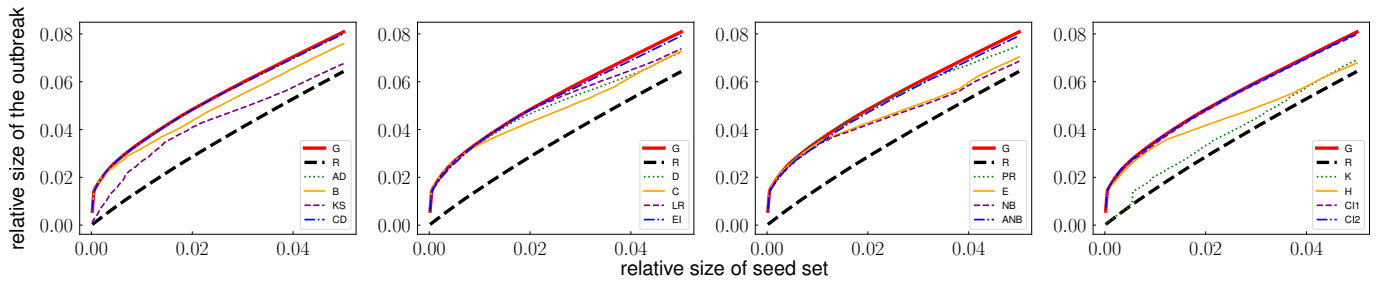

Figure 65: Jung -  $p=0.5p_c$

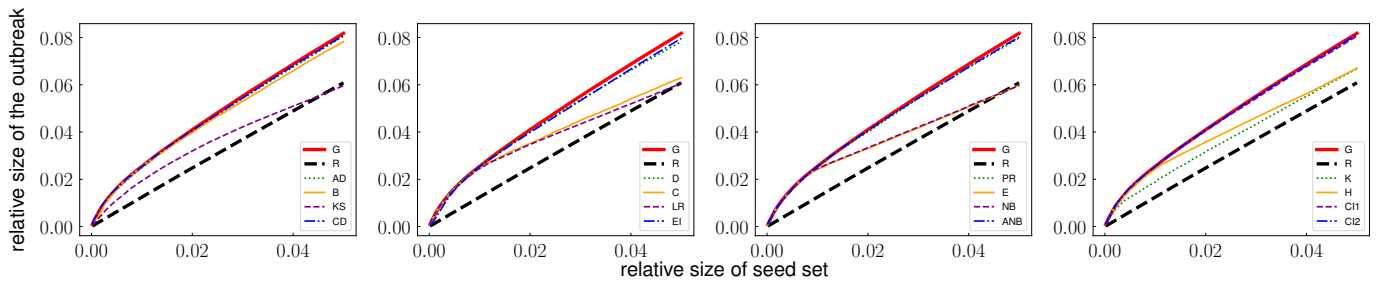

Figure 66: Gnutella, Aug. 8, 2002 -  $p=0.5p_c$

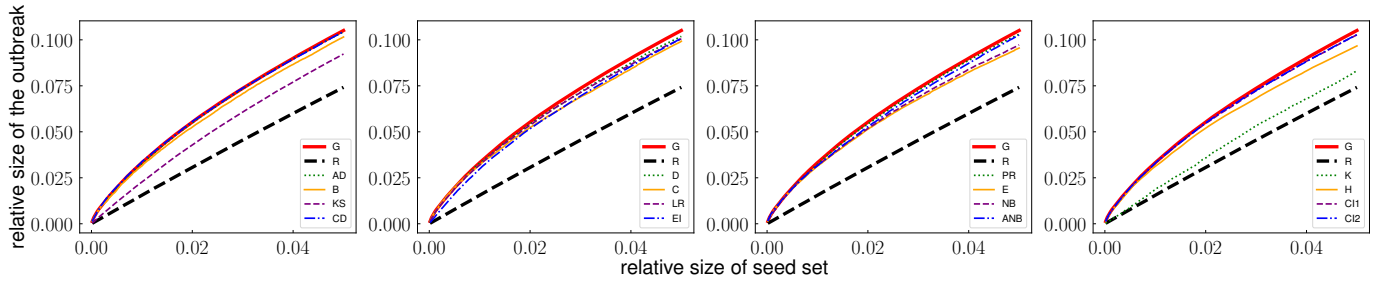

Figure 67: American -  $p=0.5p_c$

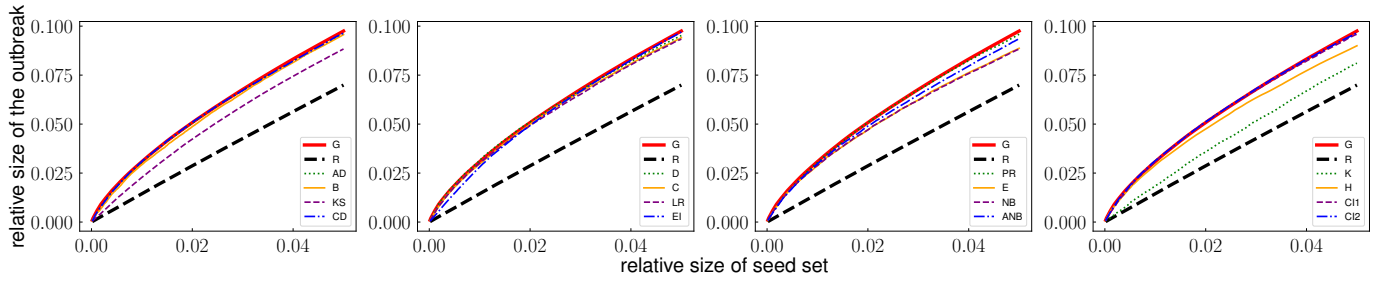

Figure 68: MIT -  $p=0.5p_c$

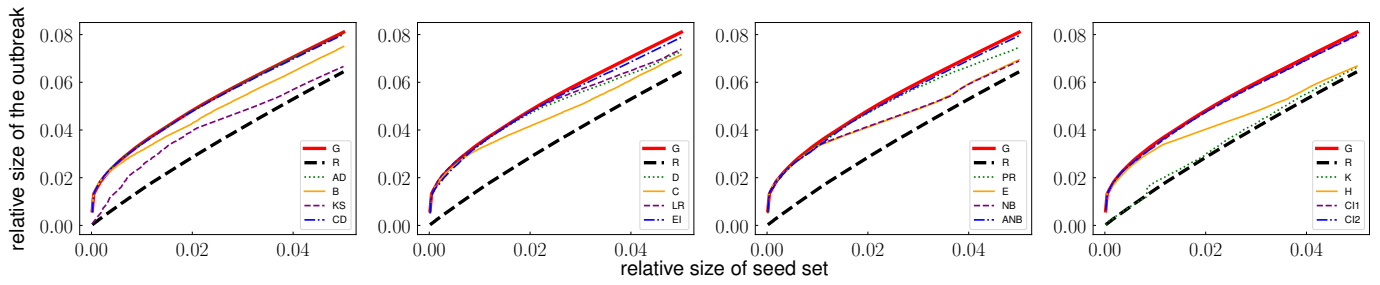

Figure 69: JDK -  $p=0.5p_c$

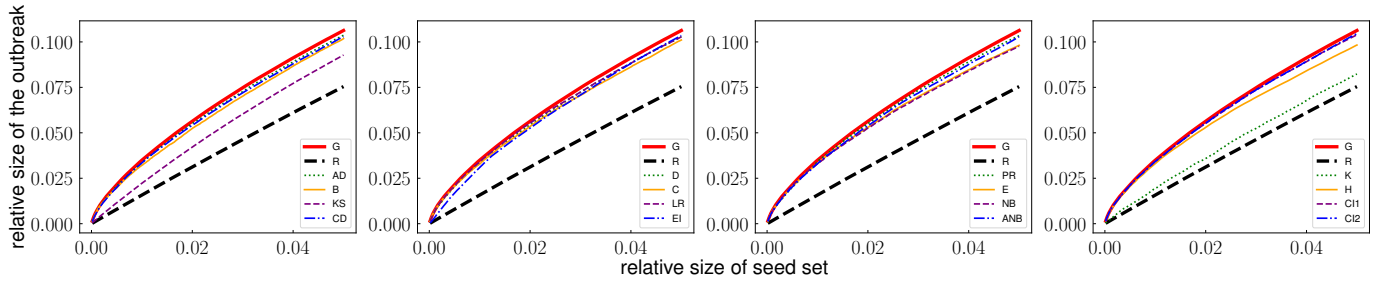

Figure 70: William -  $p=0.5p_c$

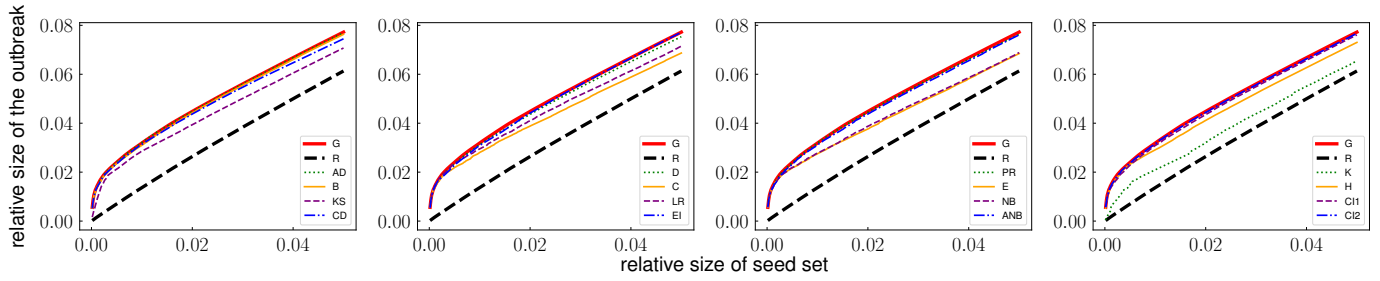

Figure 71: AS Oregon -  $p=0.5p_c$

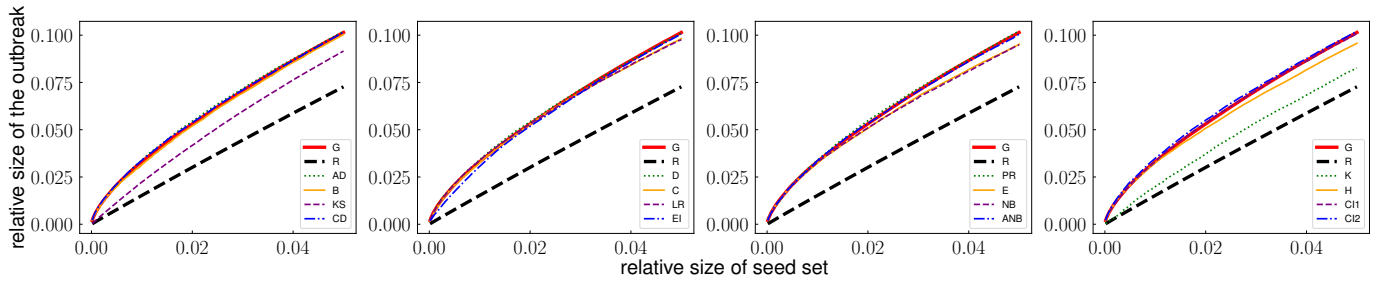

Figure 72: UChicago -  $p=0.5p_c$

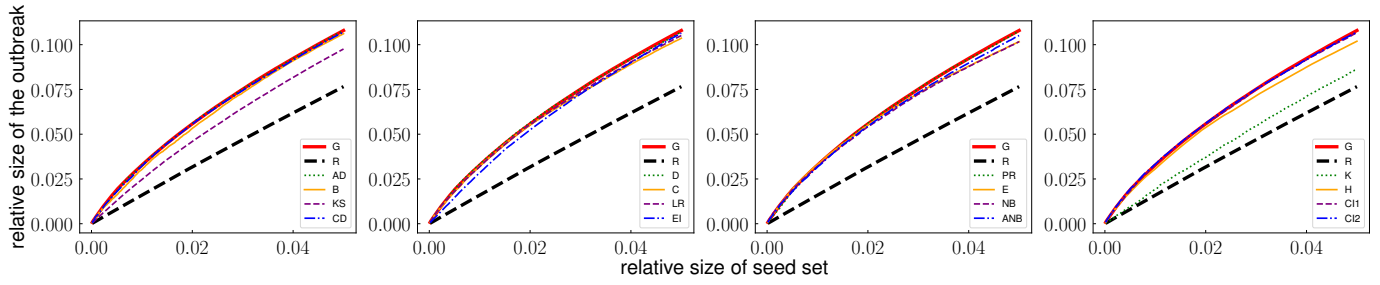

Figure 73: Princeton -  $p=0.5p_c$

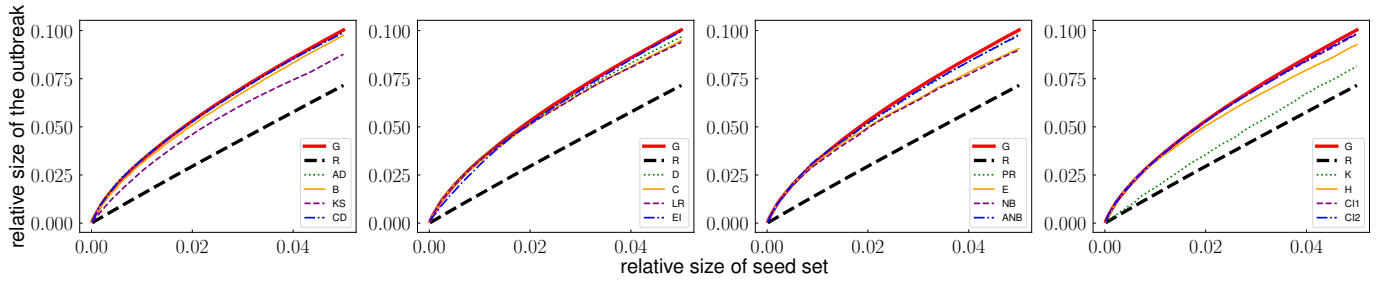

Figure 74: Carnegie -  $p=0.5p_c$

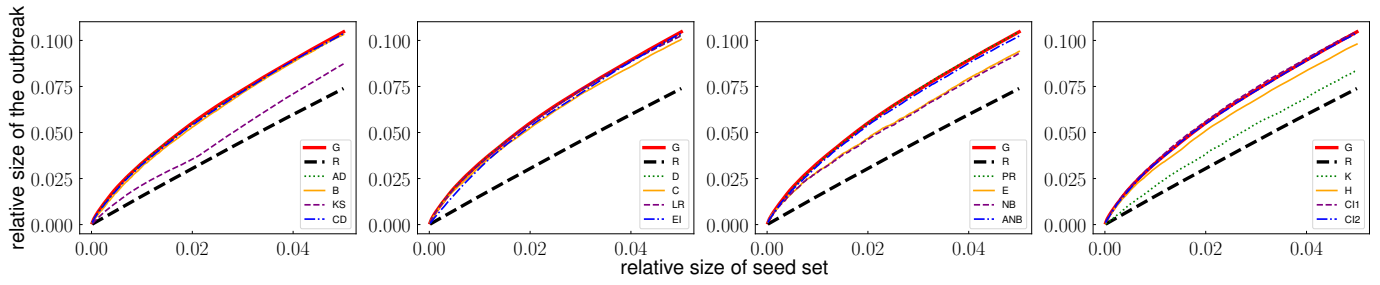

Figure 75: Tufts -  $p=0.5p_c$

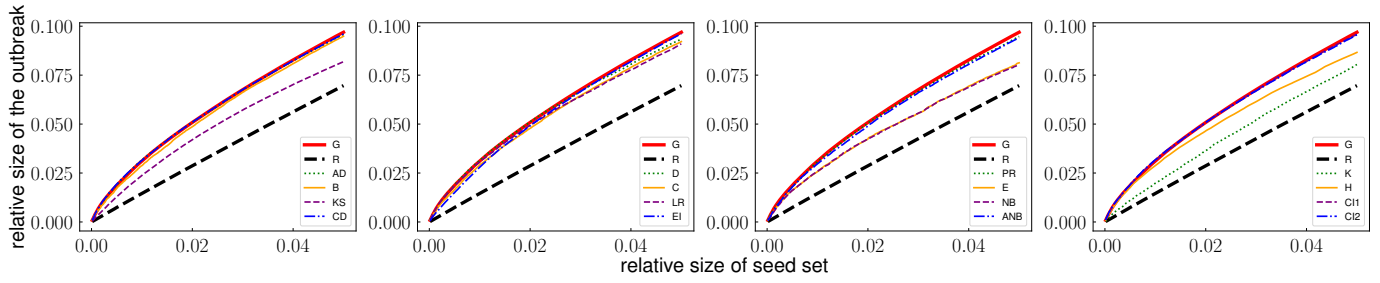

Figure 76: UC -  $p=0.5p_c$

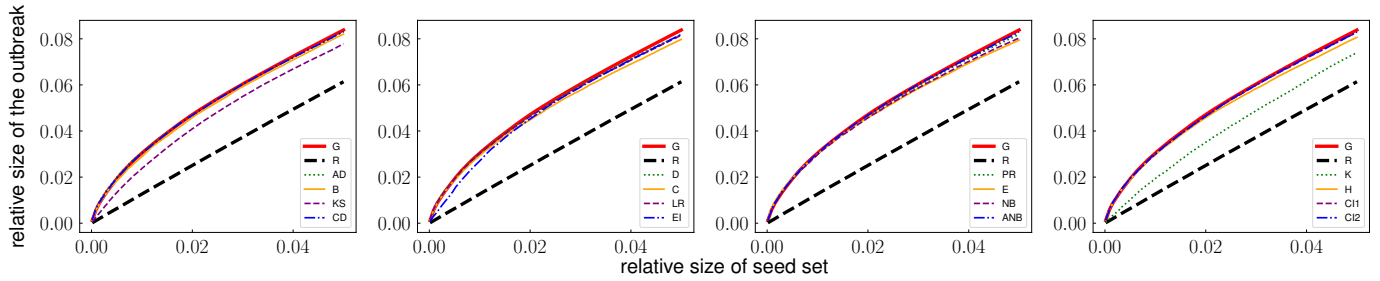

Figure 77: Wikipedia elections -  $p=0.5p_c$

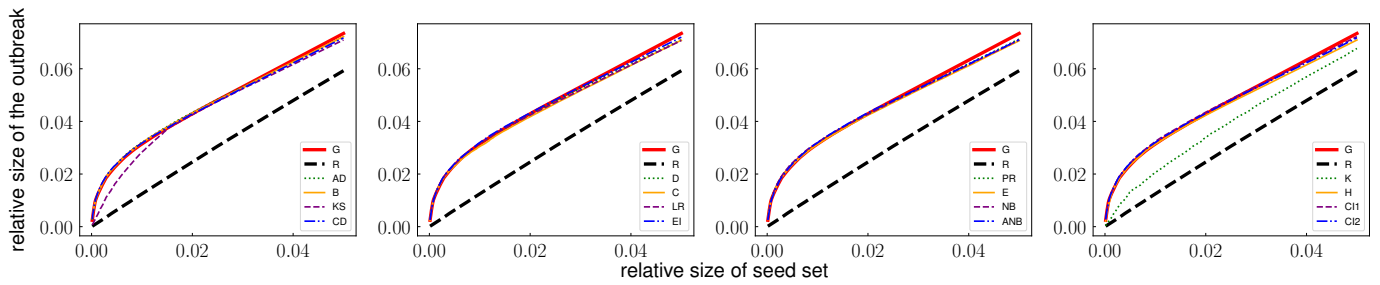

Figure 78: English -  $p=0.5p_c$

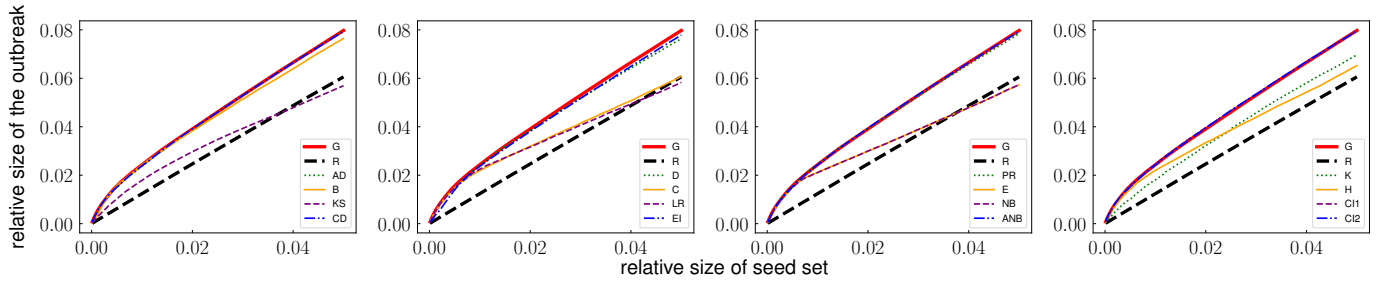

Figure 79: Gnutella, Aug. 9, 2002 -  $p=0.5p_c$

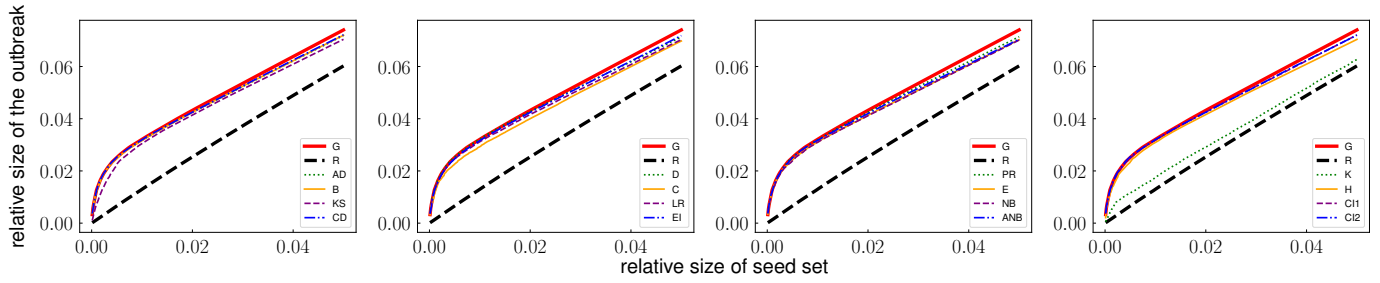

Figure 80: French -  $p=0.5p_c$

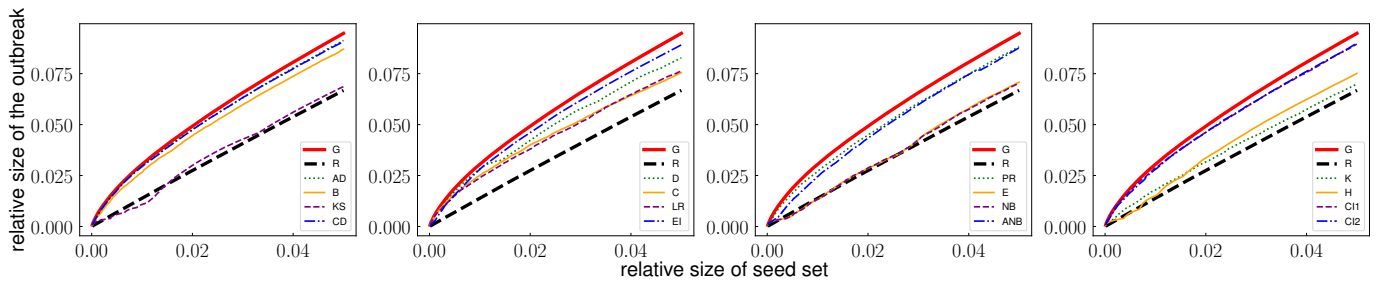

Figure 81: Hep-Th, 1993-2003 -  $p=0.5p_c$

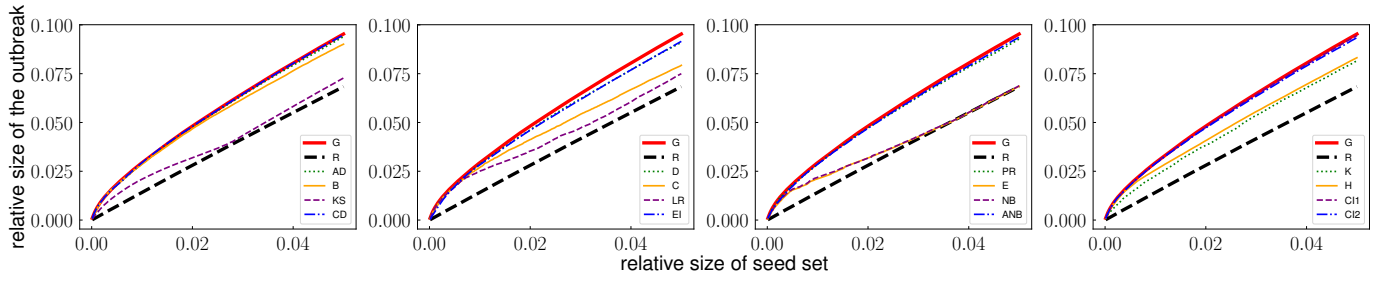

Figure 82: Gnutella, Aug. 6, 2002 -  $p=0.5p_c$

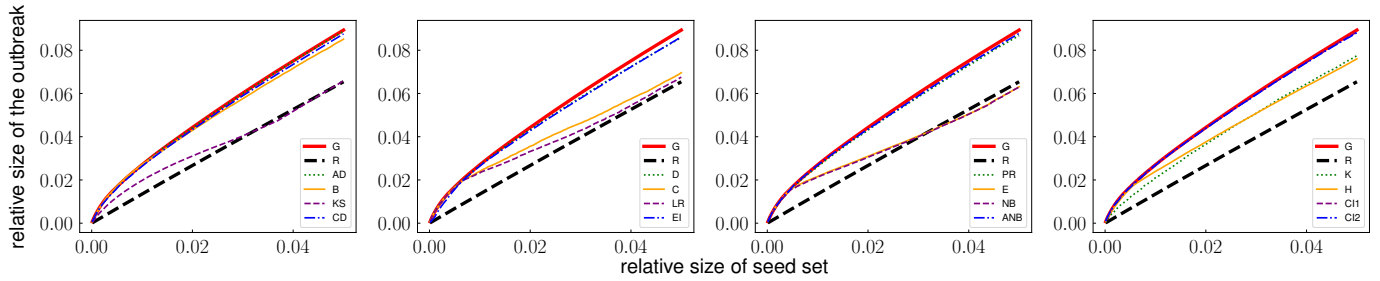

Figure 83: Gnutella, Aug. 5, 2002 -  $p=0.5p_c$

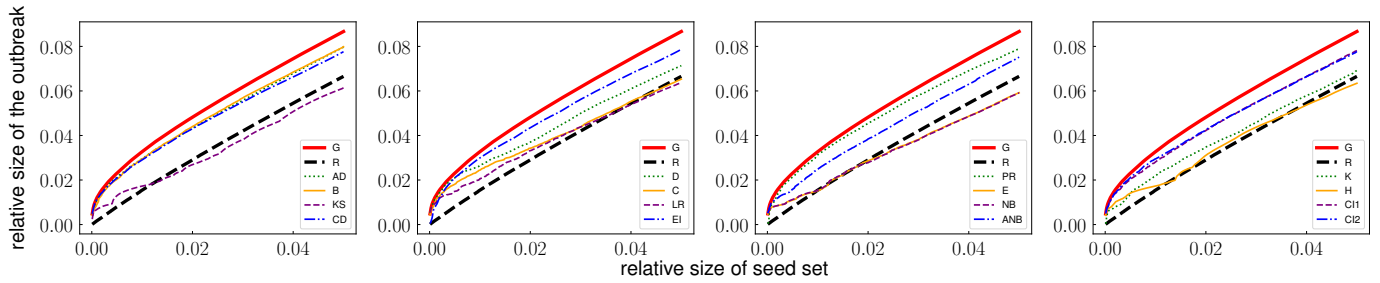

Figure 84: PGP -  $p=0.5p_c$

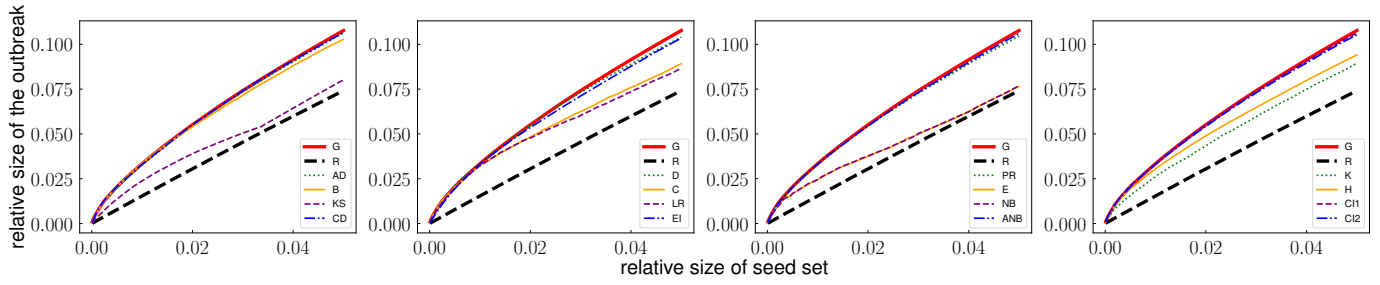

Figure 85: Gnutella, Aug. 4, 2002 -  $p=0.5p_c$

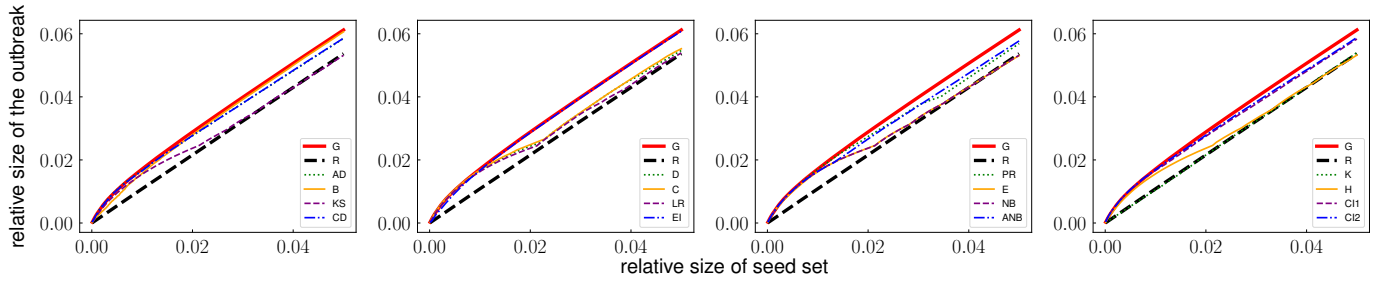

Figure 86: Hep-Ph, 1993-2003 -  $p=0.5p_c$

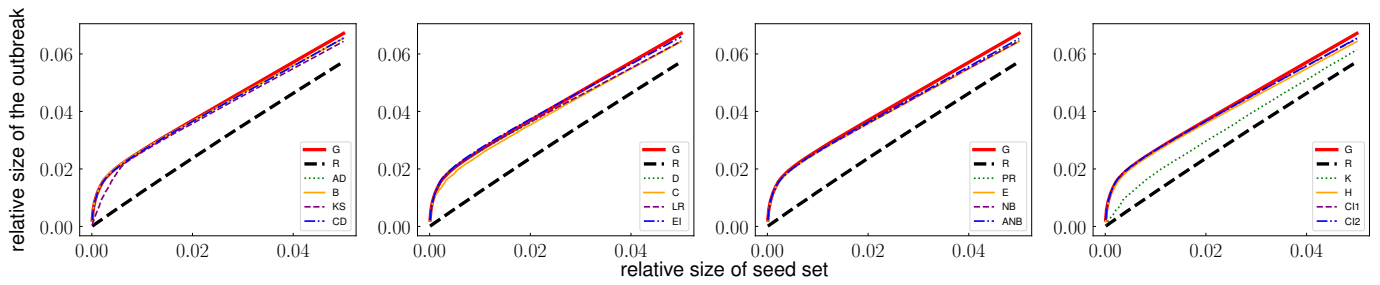

Figure 87: Spanish 1 -  $p=0.5p_c$



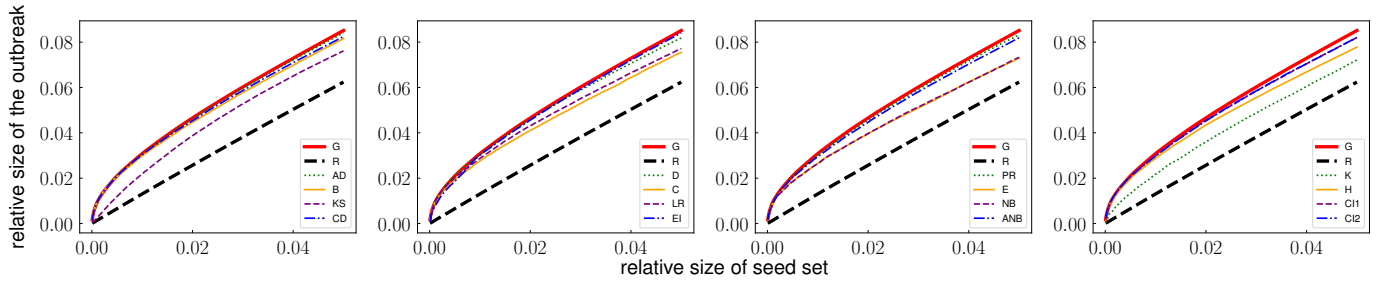

Figure 88: DBLP, citations -  $p=0.5p_c$

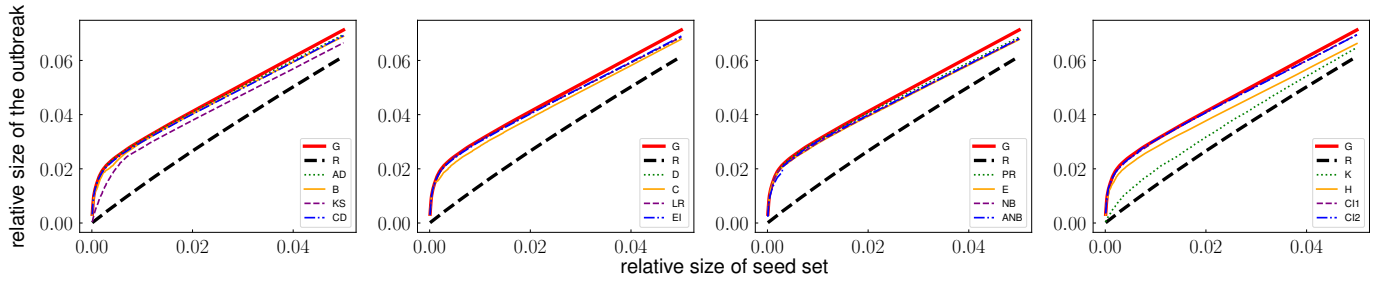

Figure 89: Spanish 2 -  $p=0.5p_c$

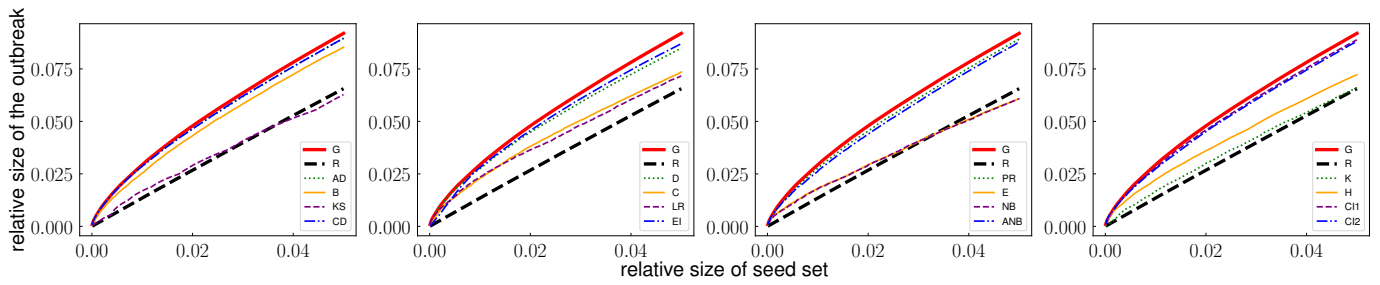

Figure 90: Cond-Mat, 1995-1999 -  $p=0.5p_c$

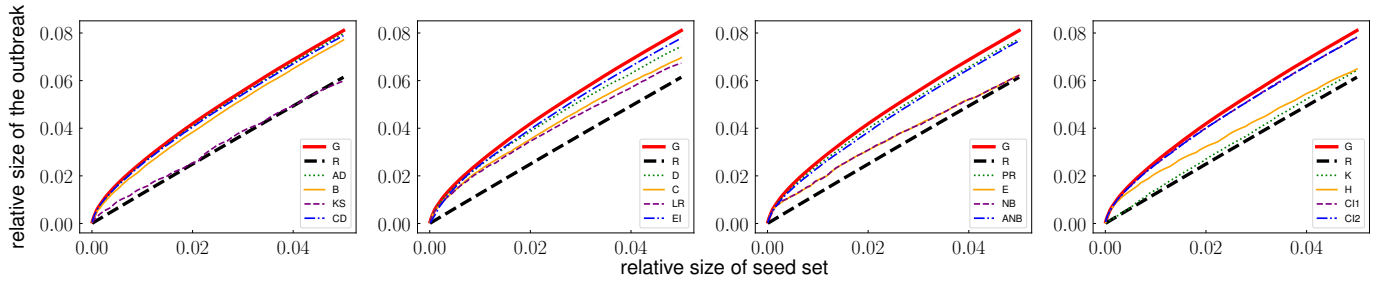

Figure 91: Astrophysics -  $p=0.5p_c$

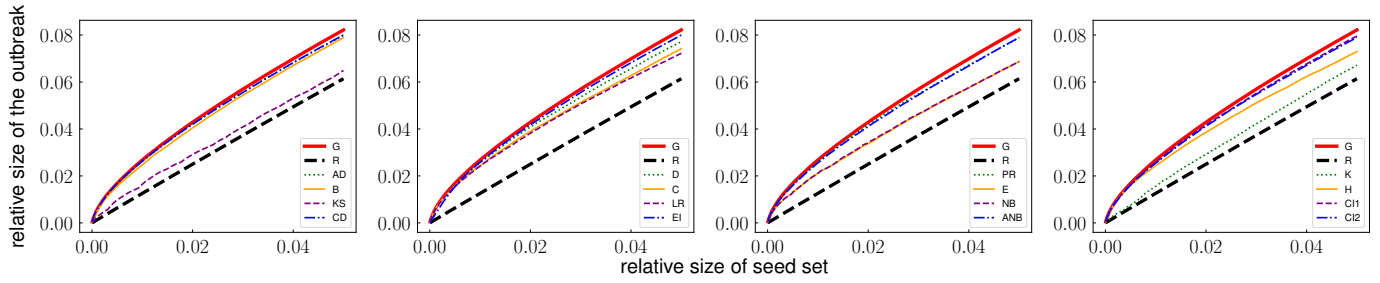

Figure 92: AstroPhys, 1993-2003 -  $p=0.5p_c$

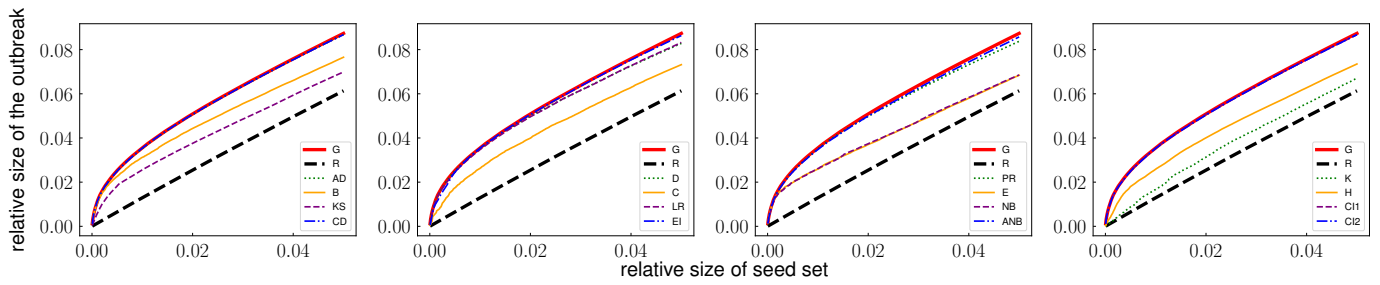

Figure 93: Marvel -  $p=0.5p_c$

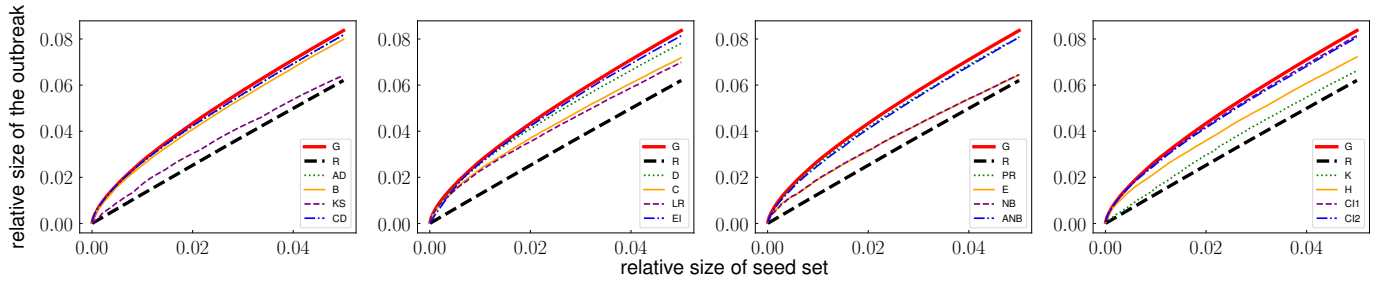

Figure 94: Cond-Mat, 1993-2003 -  $p=0.5p_c$

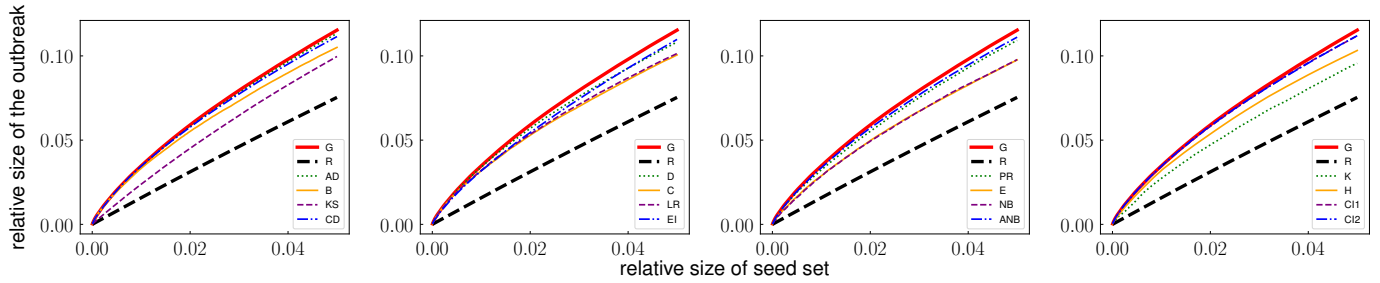

Figure 95: Gnutella, Aug. 25, 2002 -  $p=0.5p_c$

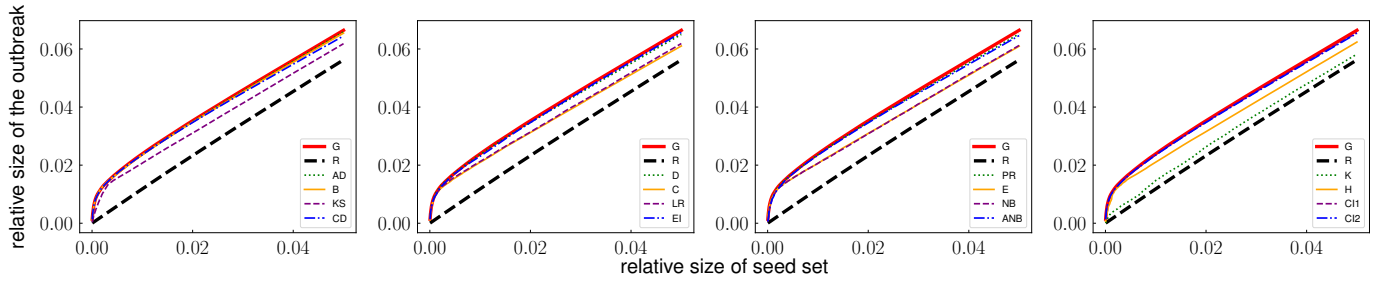

Figure 96: Internet -  $p=0.5p_c$

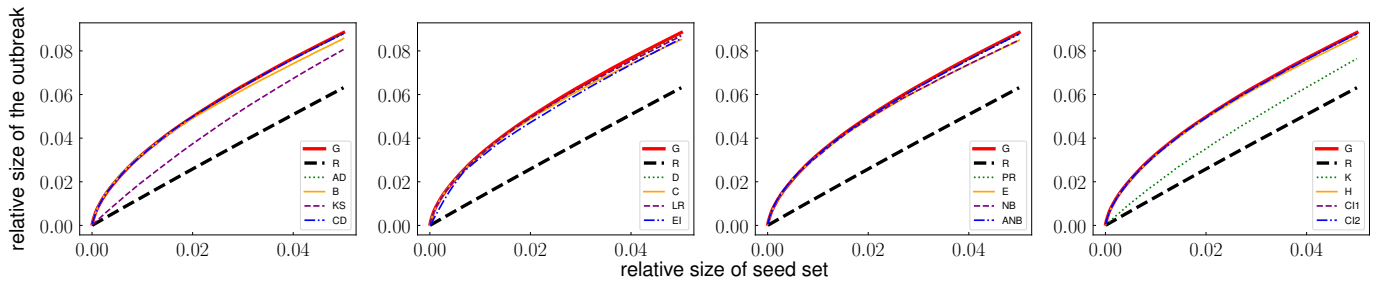

Figure 97: Thesaurus -  $p=0.5p_c$

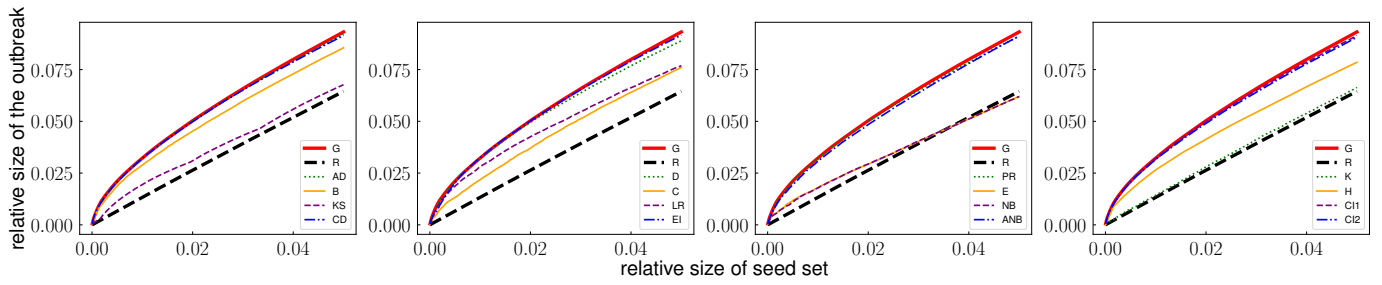

Figure 98: Cora -  $p=0.5p_c$

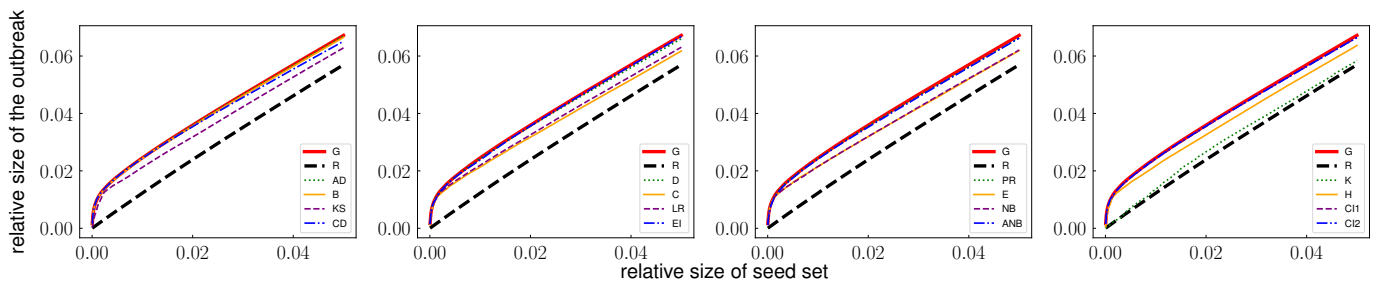

Figure 99: AS Caida -  $p=0.5p_c$

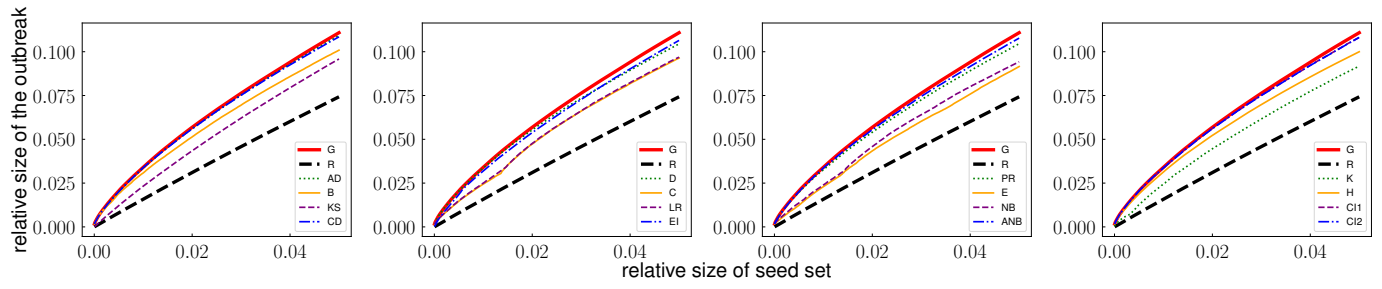

Figure 100: Gnutella, Aug. 24, 2002 -  $p=0.5p_c$

### 2.1.2 Critical Regime

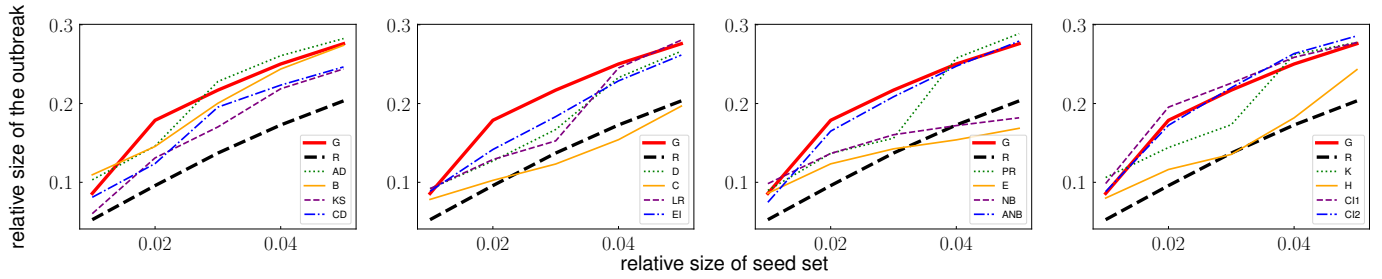

Figure 101: Political books -  $p=1.0p_c$

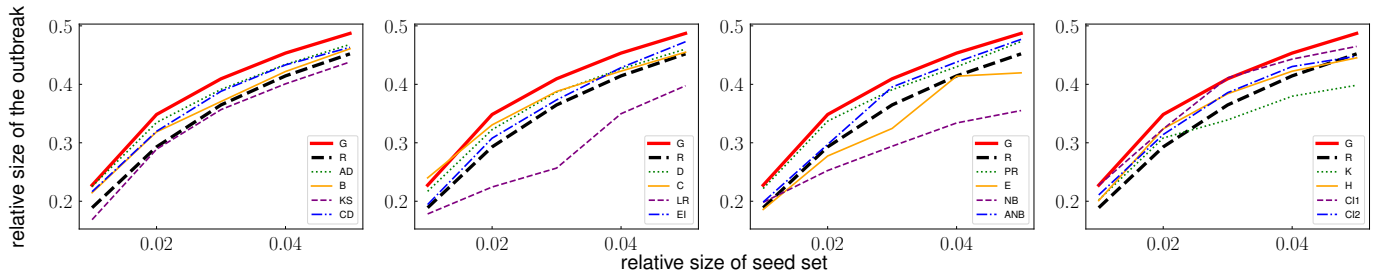

Figure 102: College football -  $p=1.0p_c$

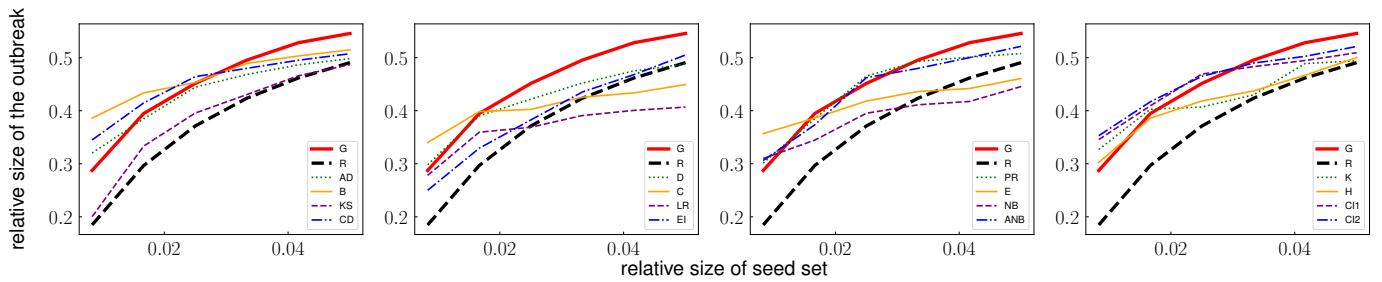

Figure 103: S208 -  $p=1.0p_c$

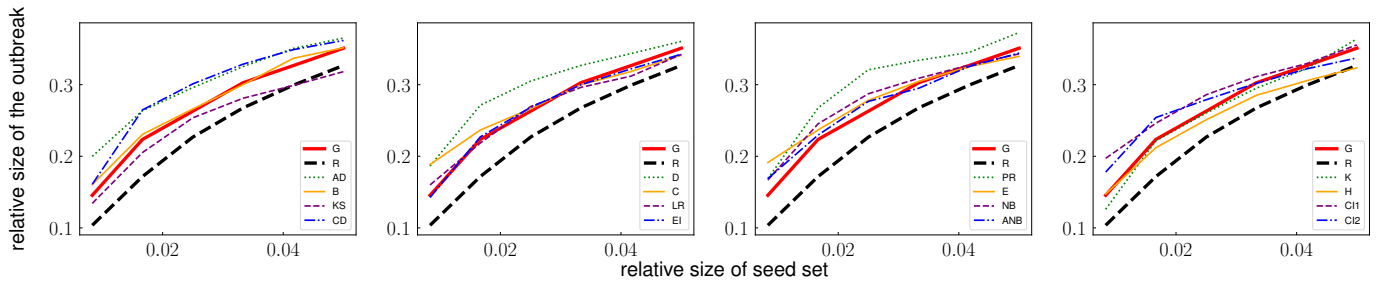

Figure 104: High school, 2011 -  $p=1.0p_c$

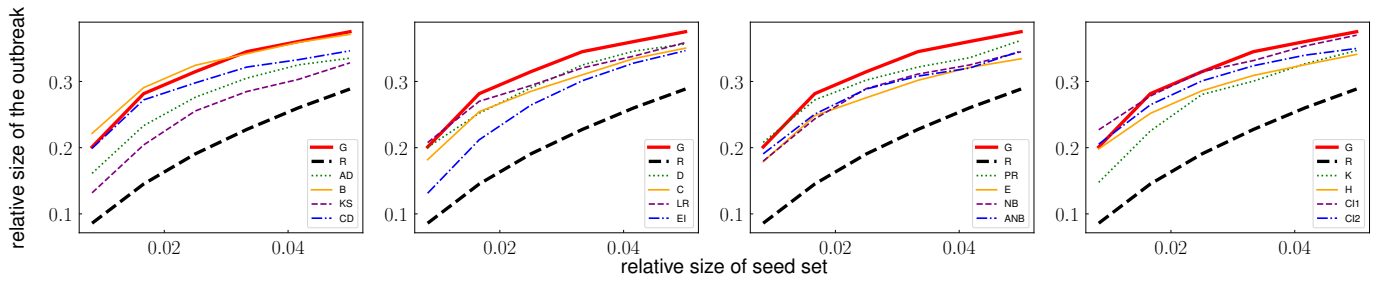

Figure 105: Bay Dry -  $p=1.0p_c$

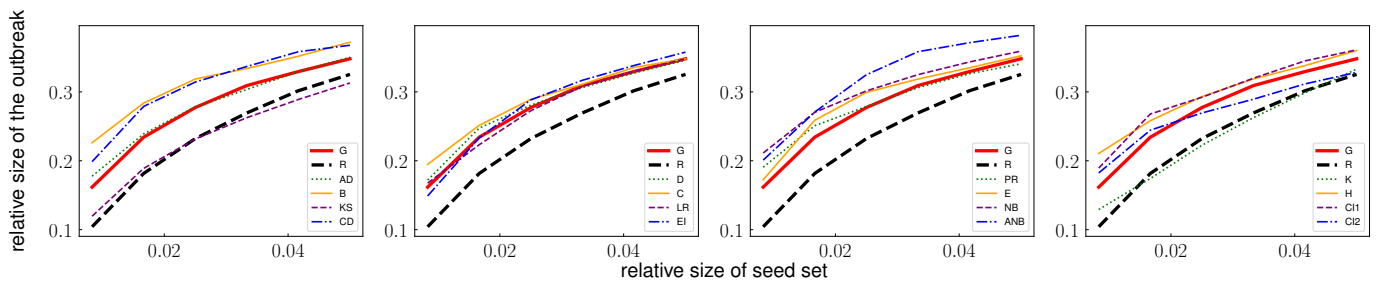

Figure 106: Bay Wet -  $p=1.0p_c$

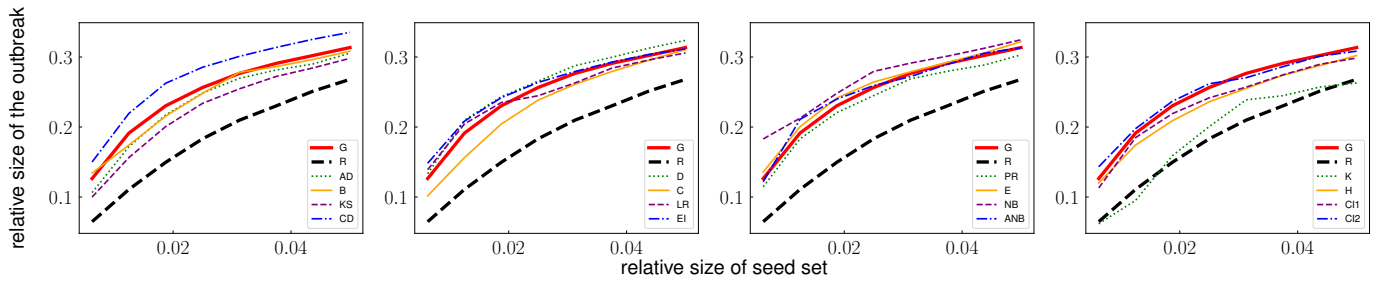

Figure 107: Radoslaw Email -  $p=1.0p_c$

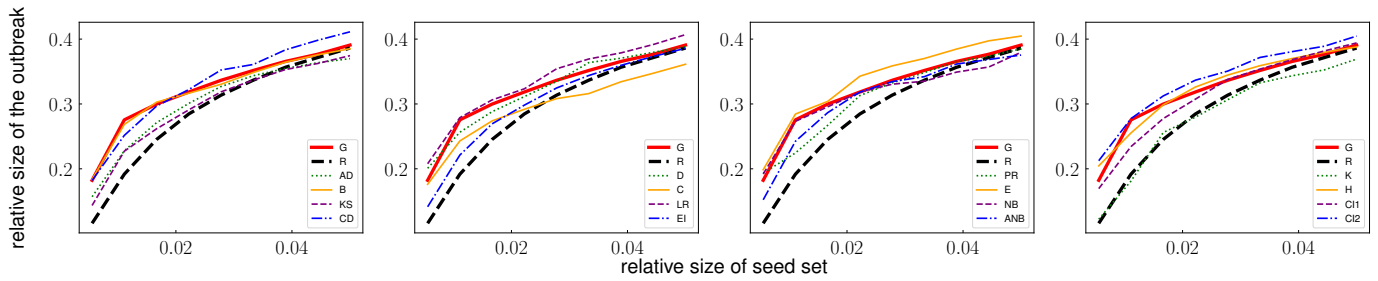

Figure 108: High school, 2012 -  $p=1.0p_c$

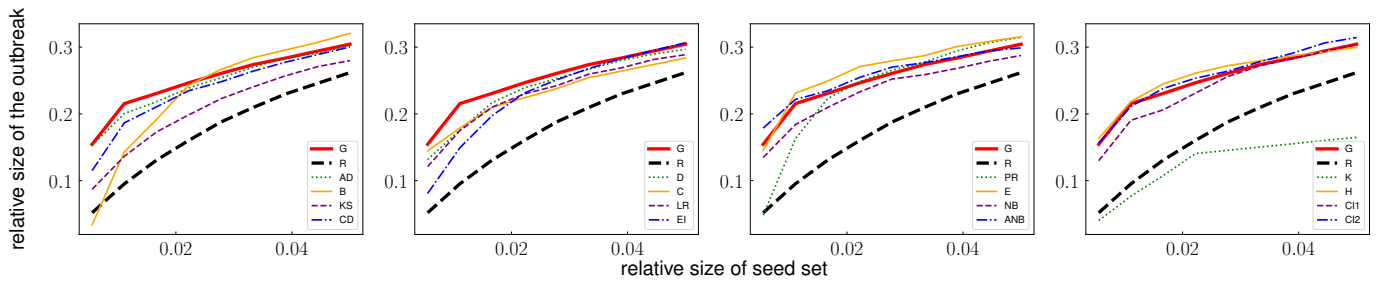

Figure 109: Little Rock Lake -  $p=1.0p_c$



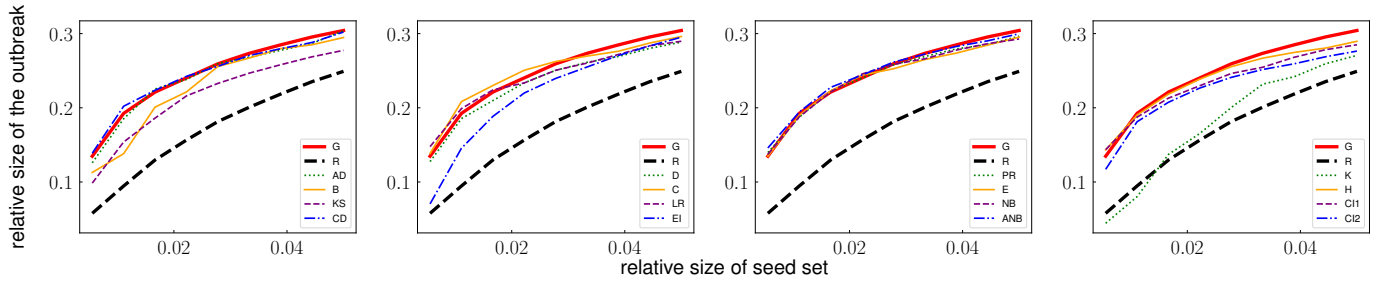

Figure 110: Jazz -  $p=1.0p_c$

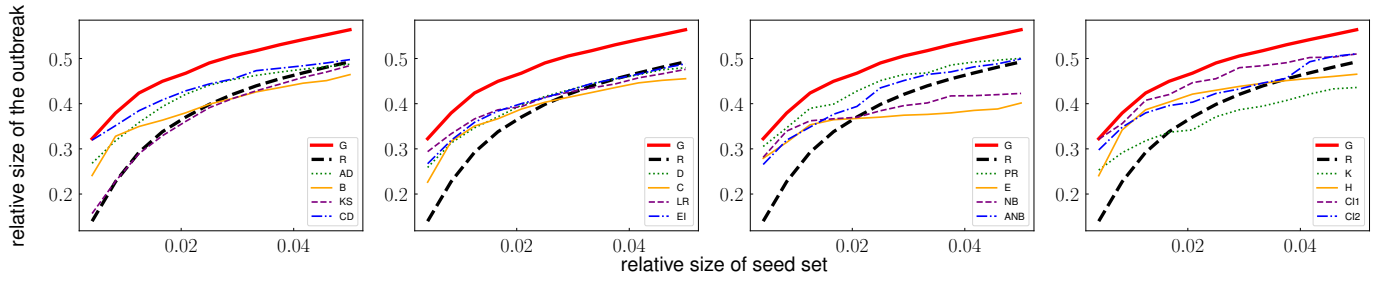

Figure 111: S420 -  $p=1.0p_c$

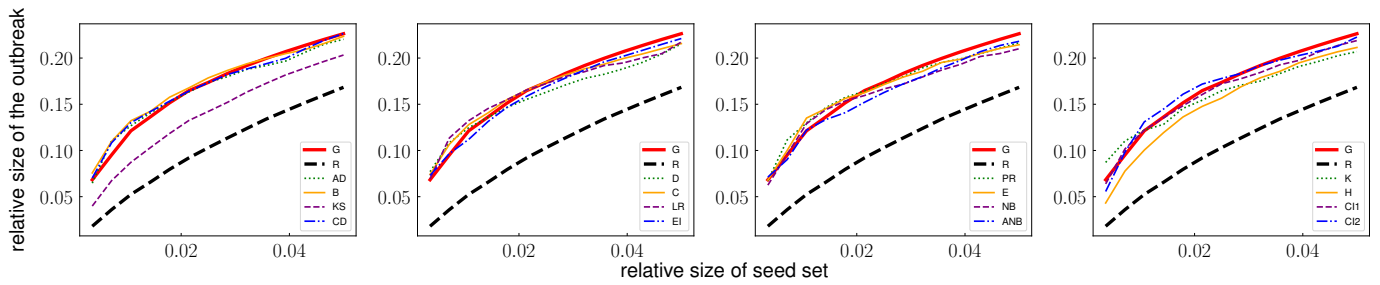

Figure 112: C. Elegans, neural -  $p=1.0p_c$

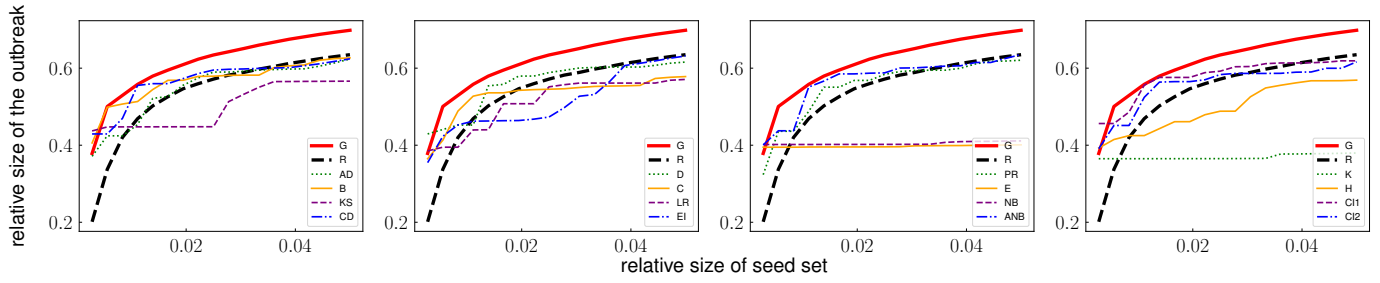

Figure 113: Network Science -  $p=1.0p_c$

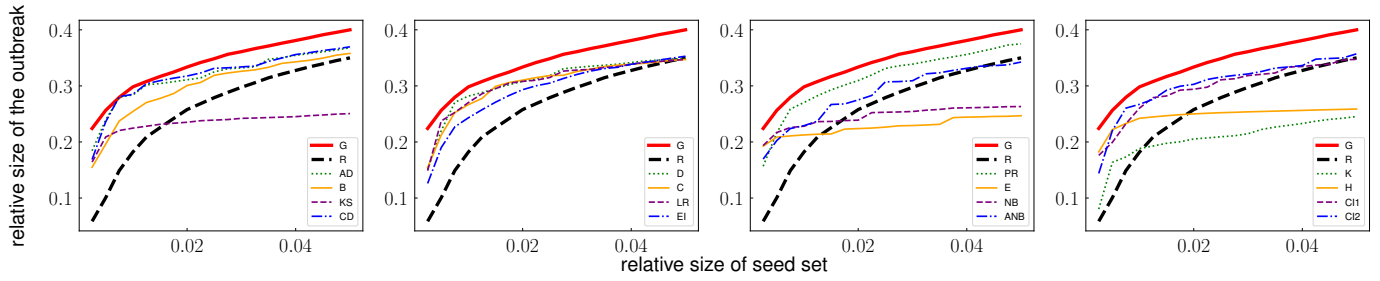

Figure 114: Dublin -  $p=1.0p_c$

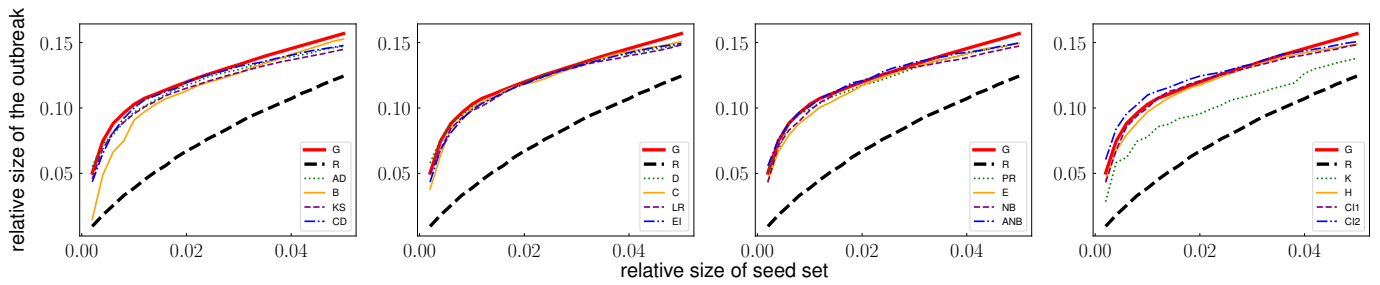

Figure 115: US Air Transportation -  $p=1.0p_c$

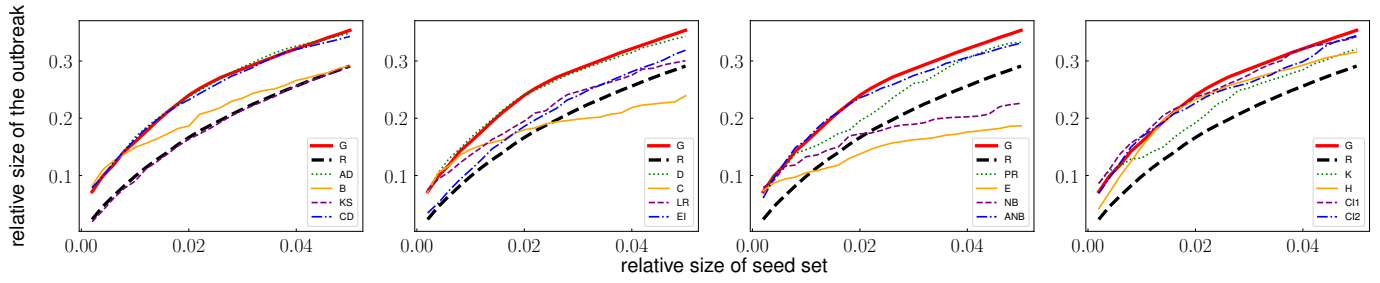

Figure 116: S838 -  $p=1.0p_c$

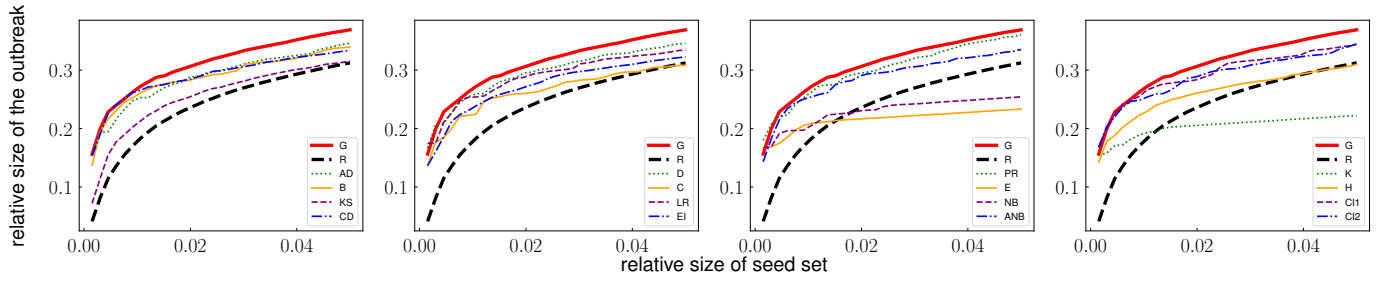

Figure 117: Yeast, transcription -  $p=1.0p_c$

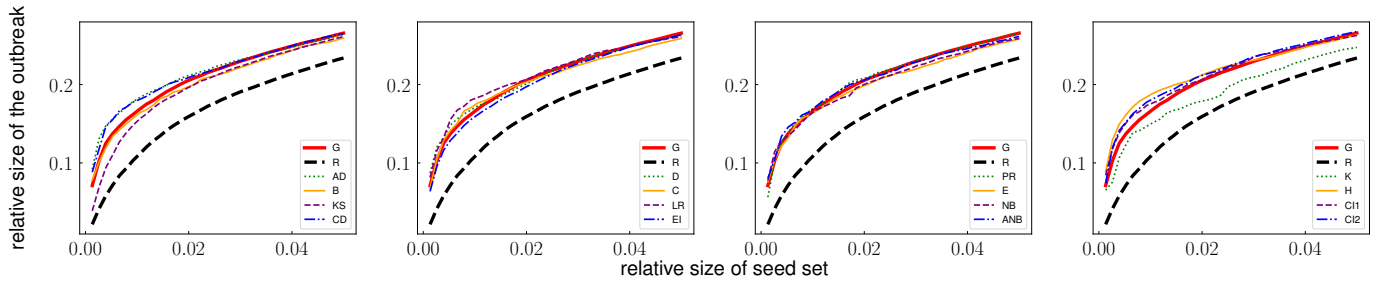

Figure 118: Caltech -  $p=1.0p_c$

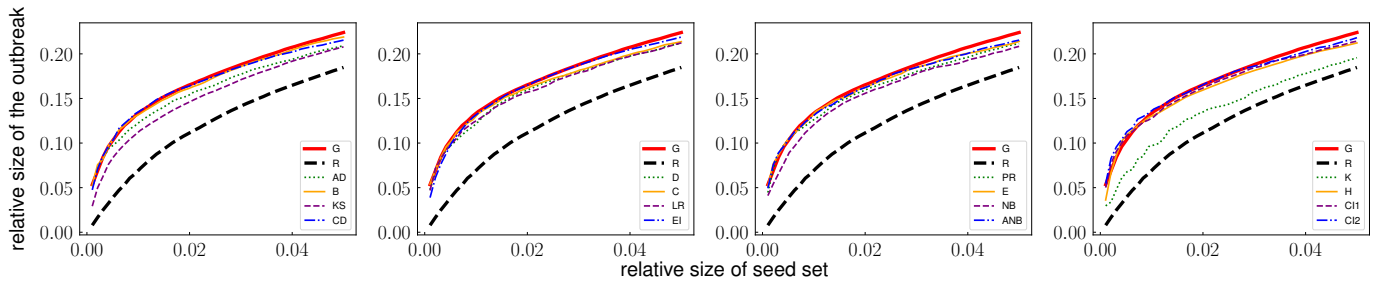

Figure 119: Reed -  $p=1.0p_c$

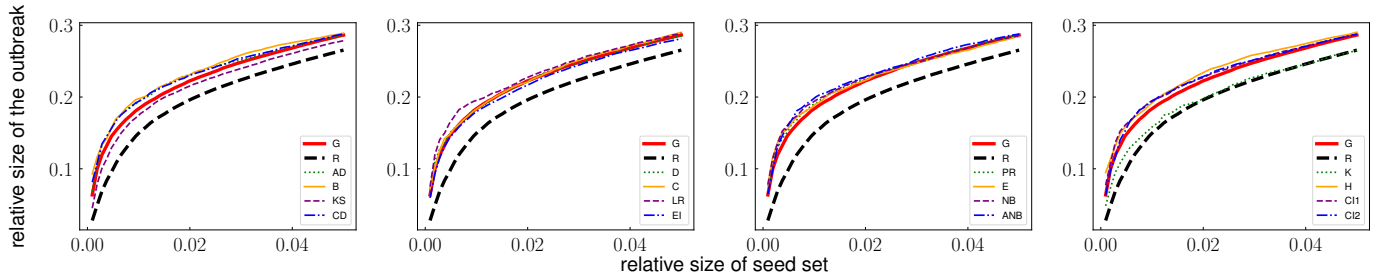

Figure 120: Mouse retina -  $p=1.0p_c$

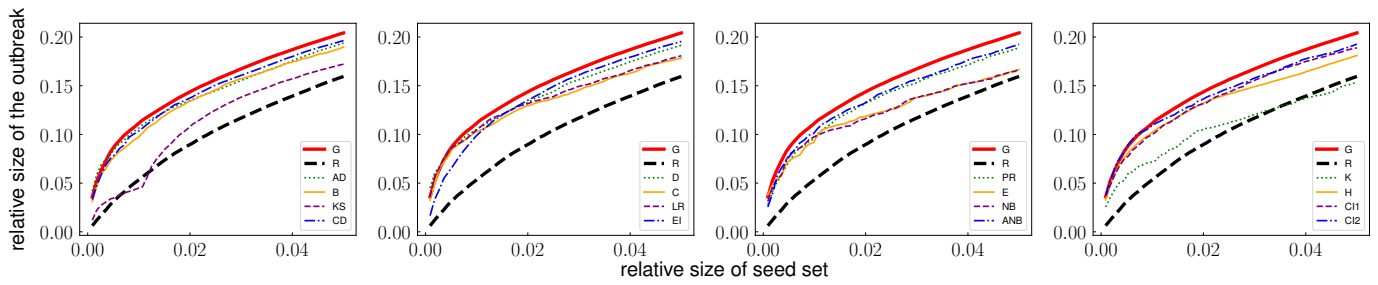

Figure 121: URV email -  $p=1.0p_c$

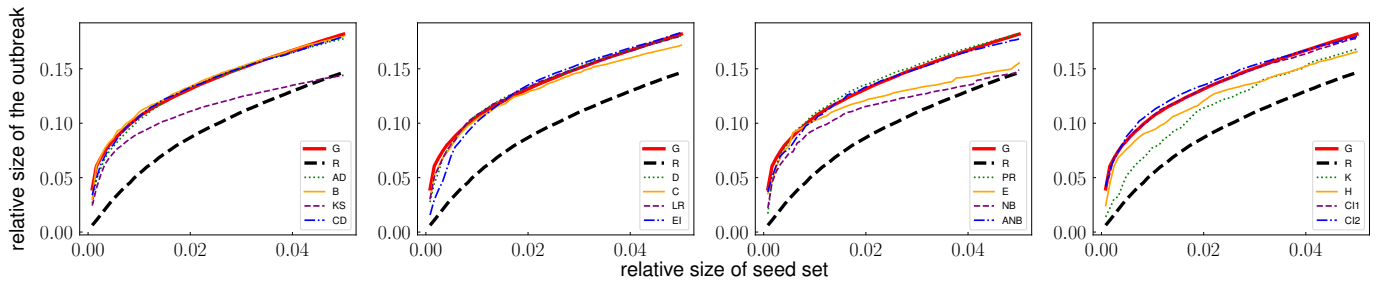

Figure 122: Political blogs -  $p=1.0p_c$

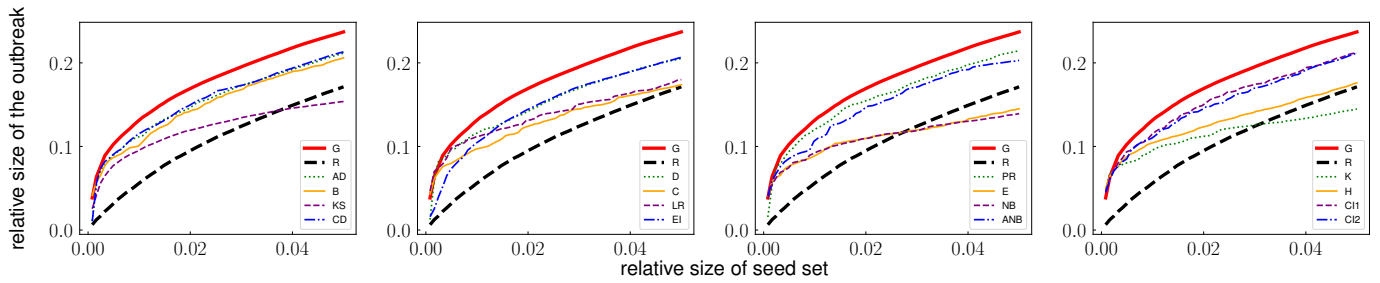

Figure 123: Air traffic -  $p=1.0p_c$

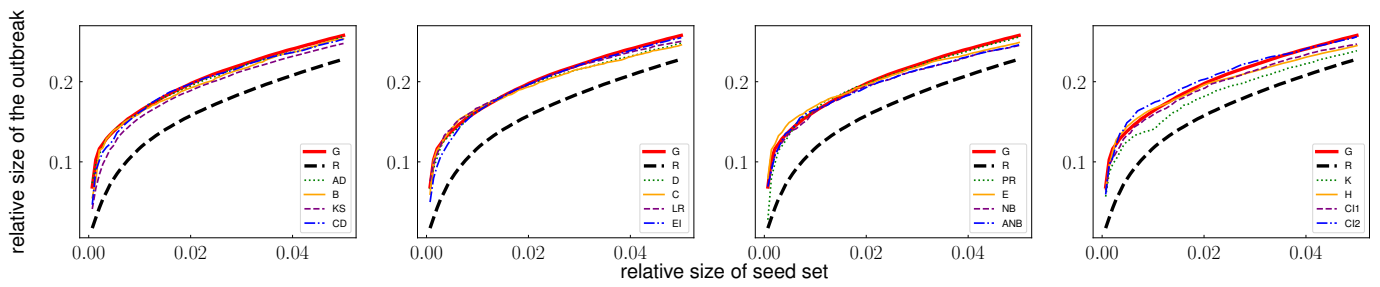

Figure 124: Haverford -  $p=1.0p_c$

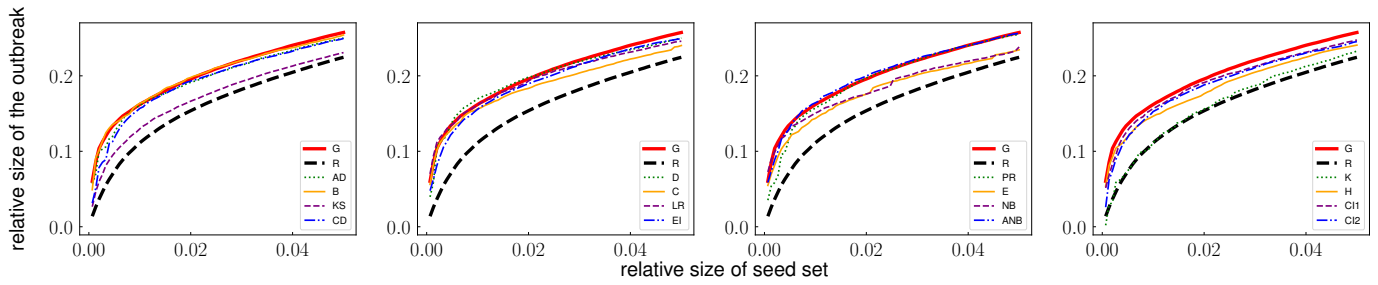

Figure 125: Simmons -  $p=1.0p_c$

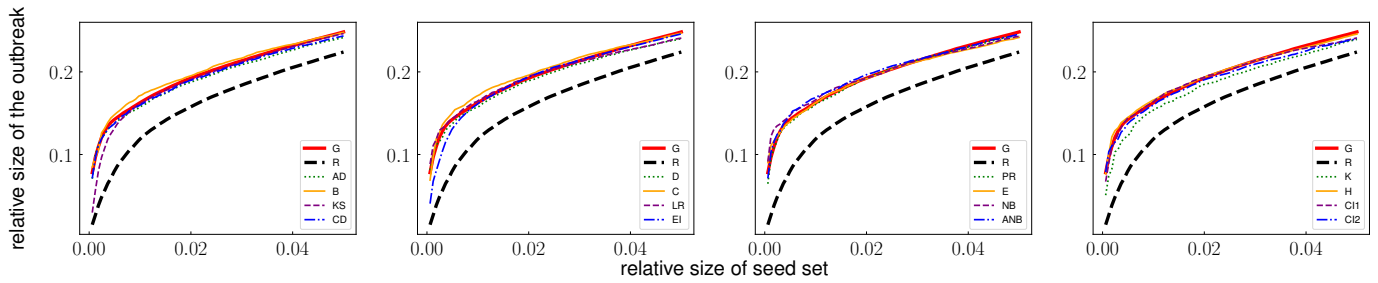

Figure 126: Swarthmore -  $p=1.0p_c$

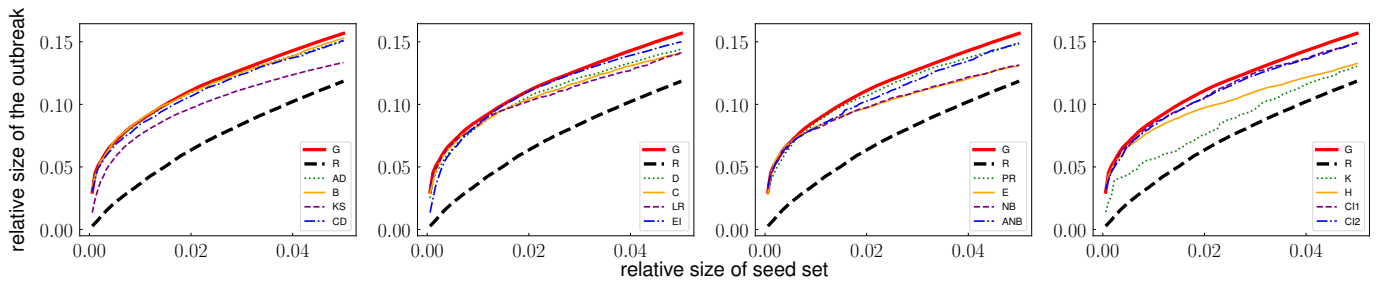

Figure 127: Petster, hamster -  $p=1.0p_c$

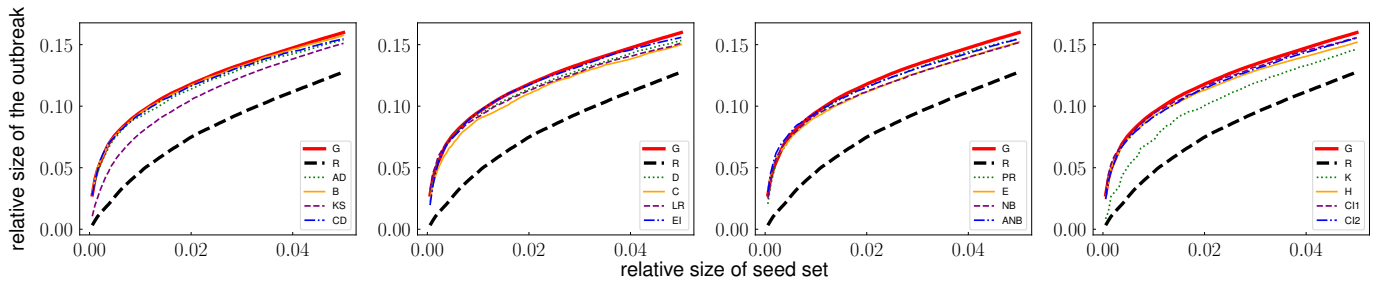

Figure 128: UC Irvine -  $p=1.0p_c$

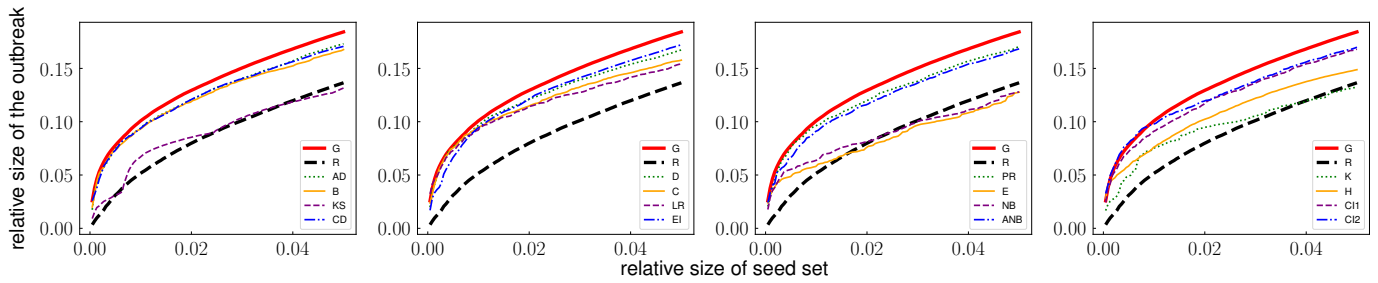

Figure 129: Yeast, protein -  $p=1.0p_c$

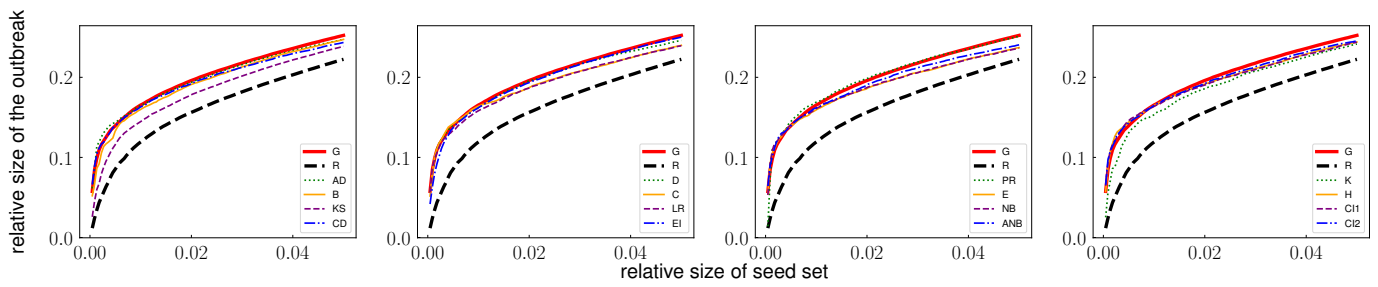

Figure 130: Amherst -  $p=1.0p_c$

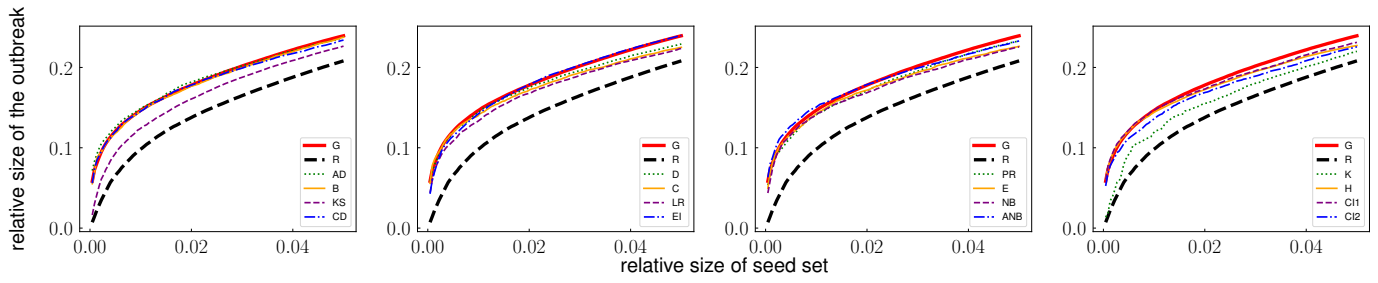

Figure 131: Bowdoin -  $p=1.0p_c$

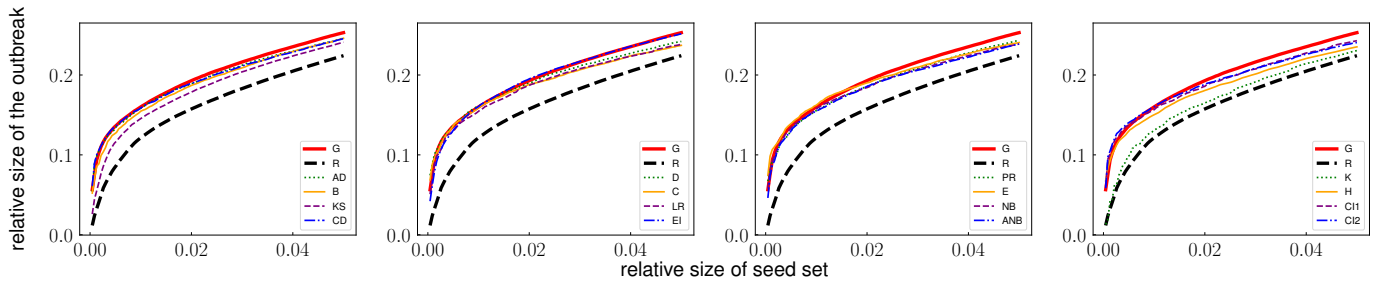

Figure 132: Hamilton -  $p=1.0p_c$

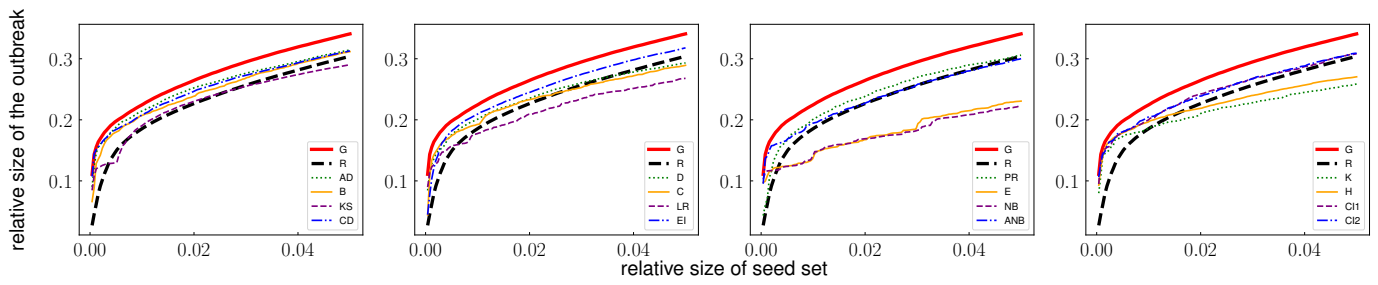

Figure 133: Adolescent health -  $p=1.0p_c$



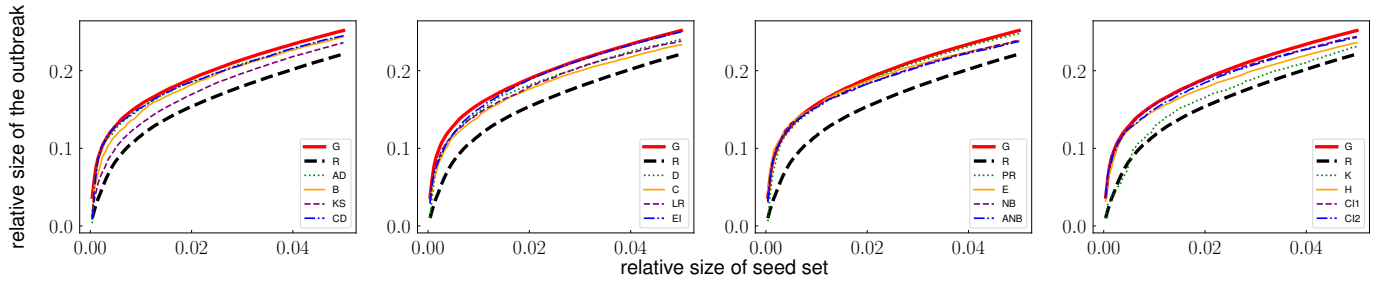

Figure 134: Trinity -  $p=1.0p_c$

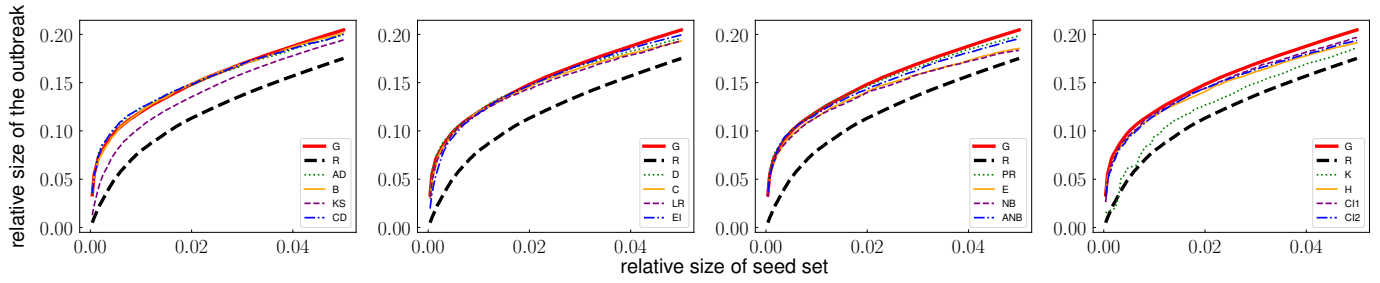

Figure 135: USFCA -  $p=1.0p_c$

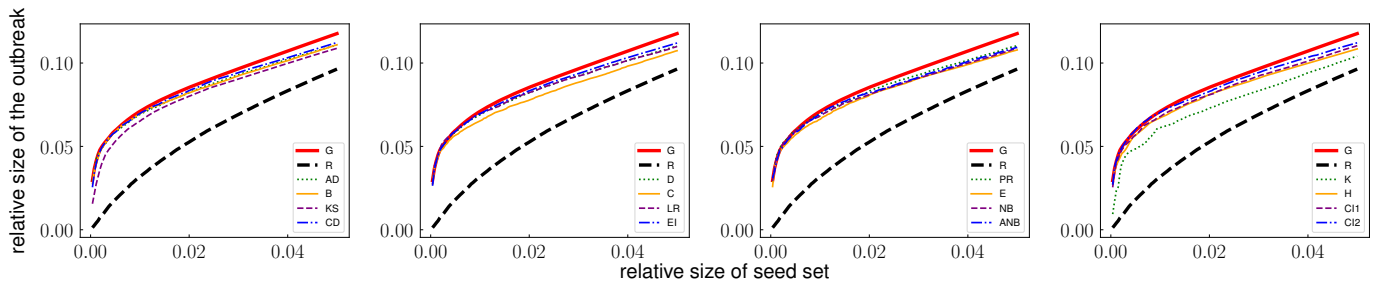

Figure 136: Japanese -  $p=1.0p_c$

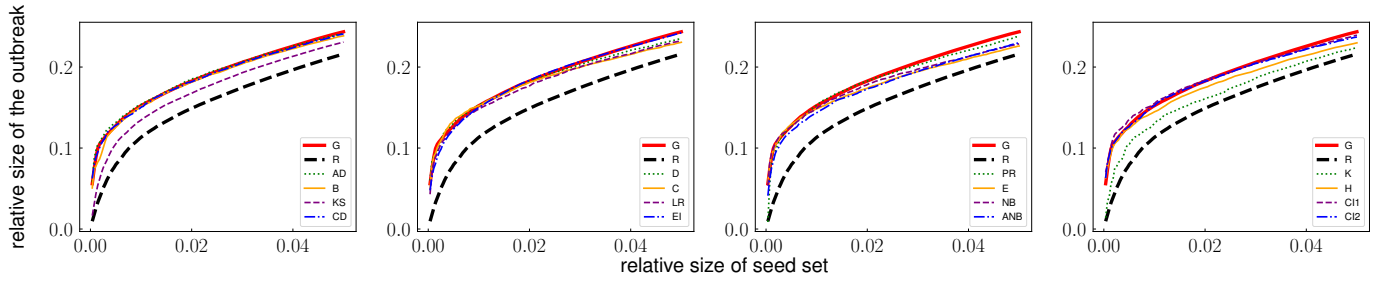

Figure 137: Williams -  $p=1.0p_c$

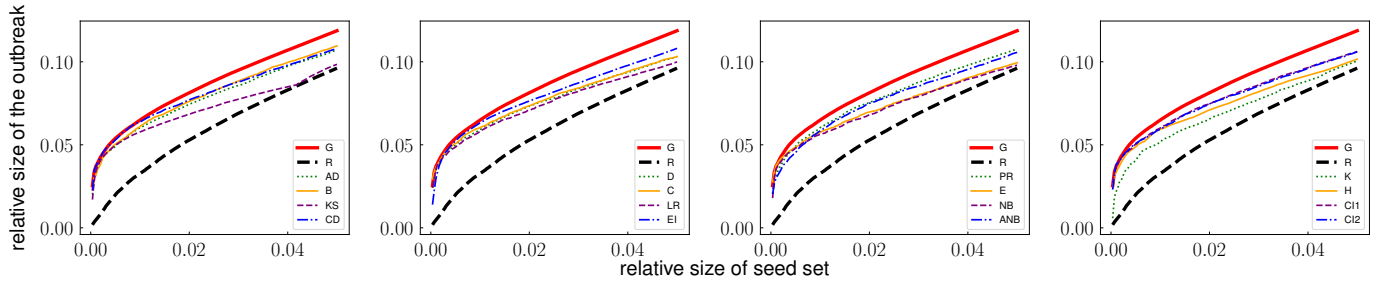

Figure 138: Open flights -  $p=1.0p_c$

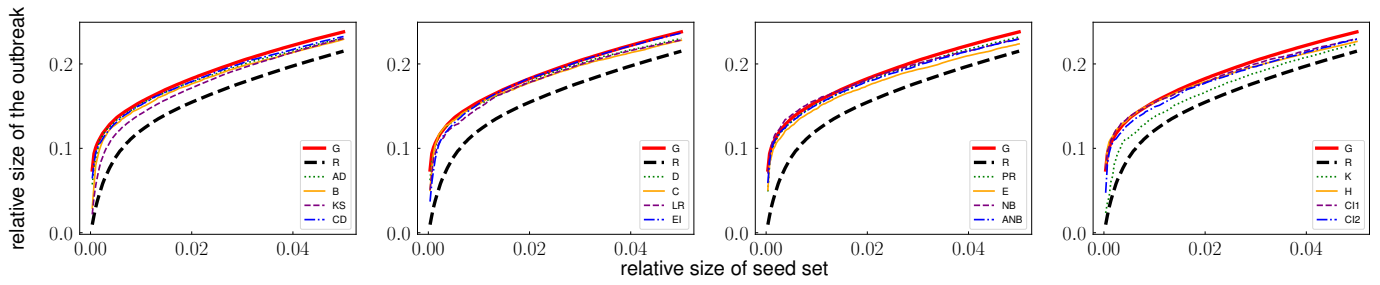

Figure 139: Oberlin -  $p=1.0p_c$

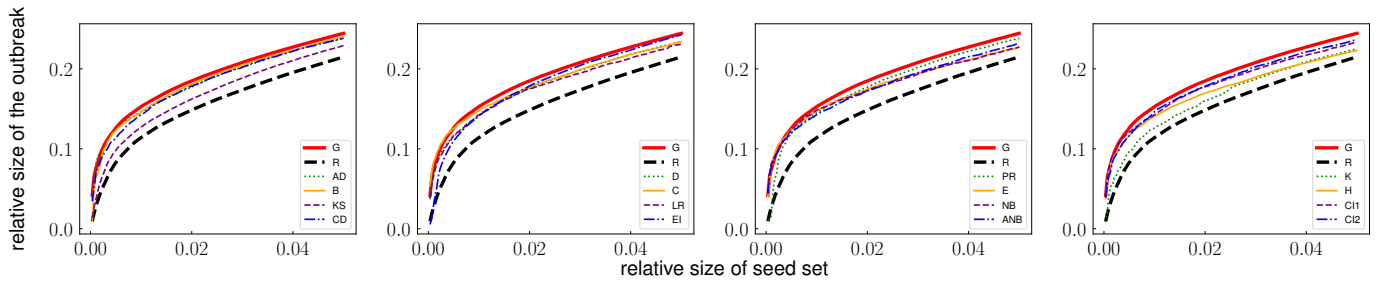

Figure 140: Smith -  $p=1.0p_c$

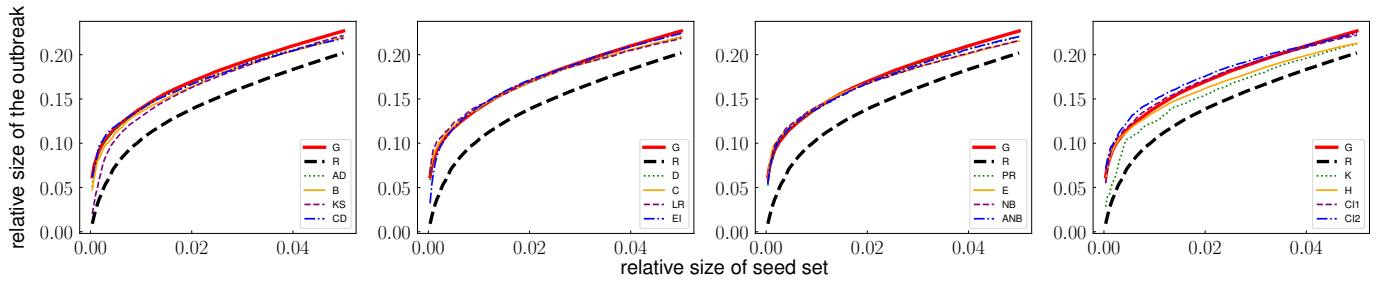

Figure 141: Wellesley -  $p=1.0p_c$

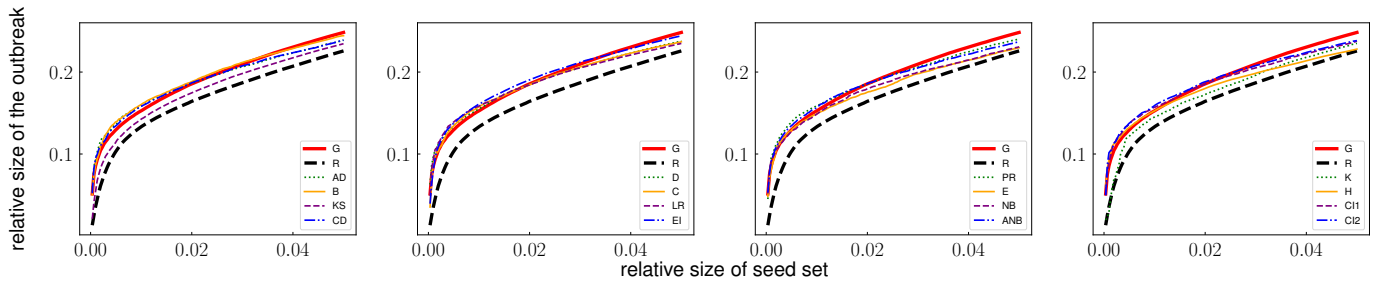

Figure 142: Vassar -  $p=1.0p_c$

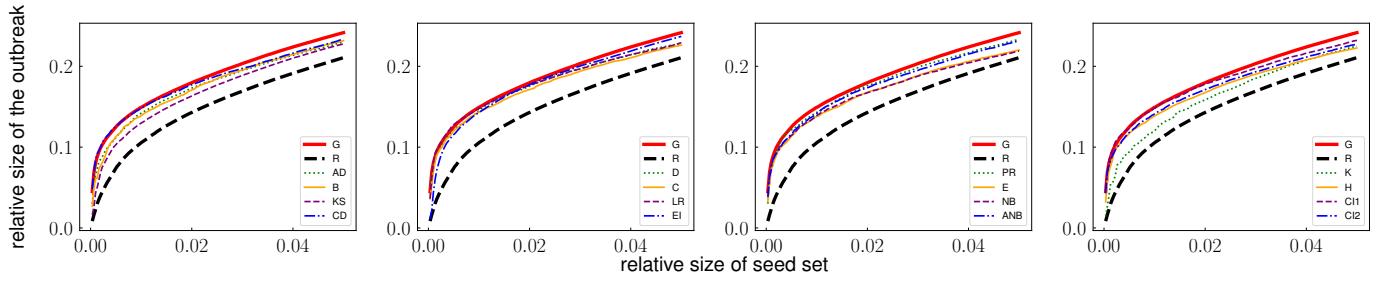

Figure 143: Middlebury -  $p=1.0p_c$

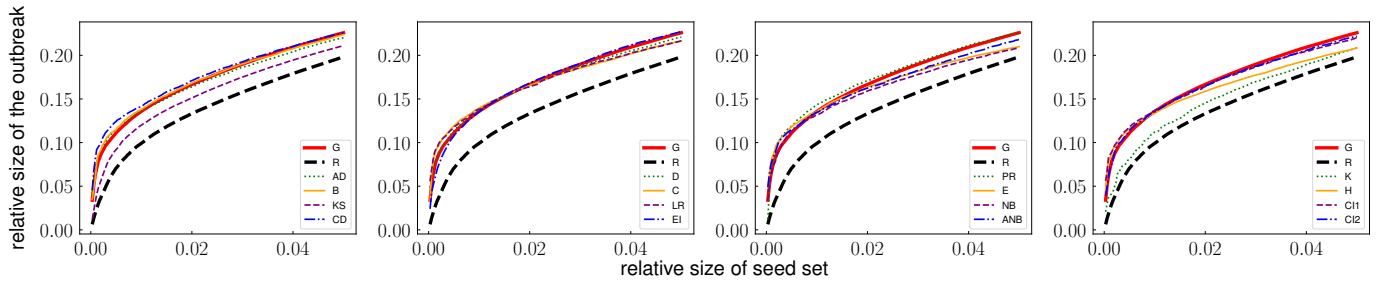

Figure 144: Pepperdine -  $p=1.0p_c$

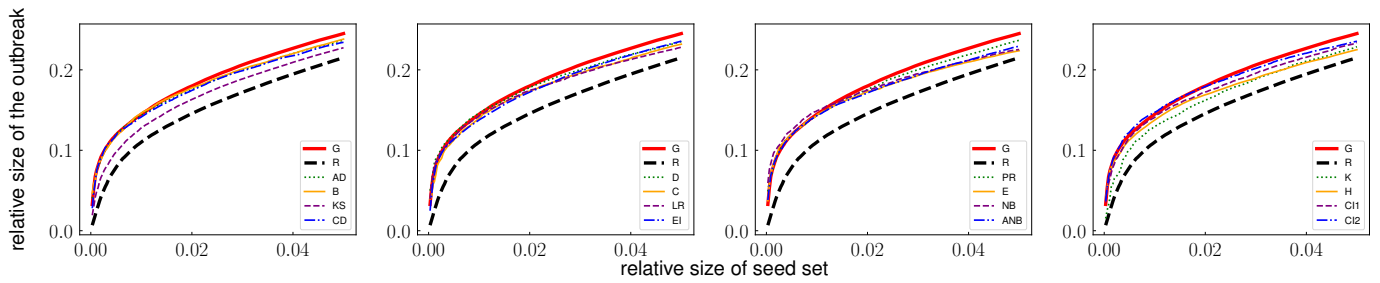

Figure 145: Colgate -  $p=1.0p_c$

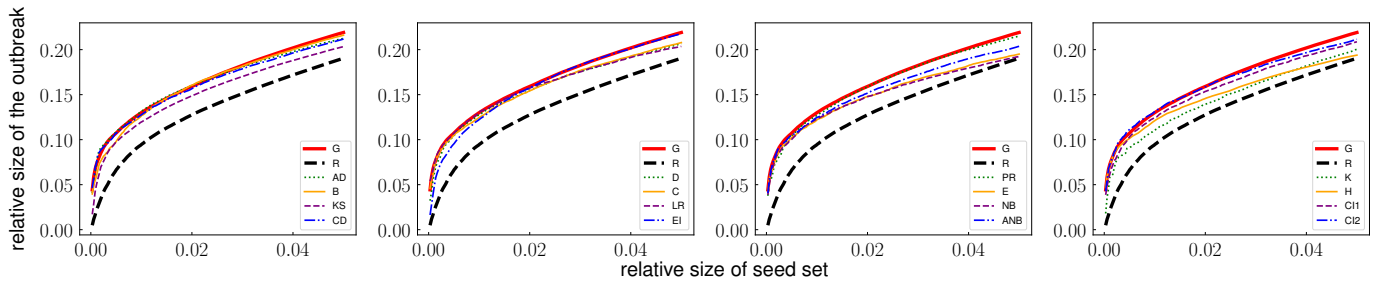

Figure 146: Santa -  $p=1.0p_c$

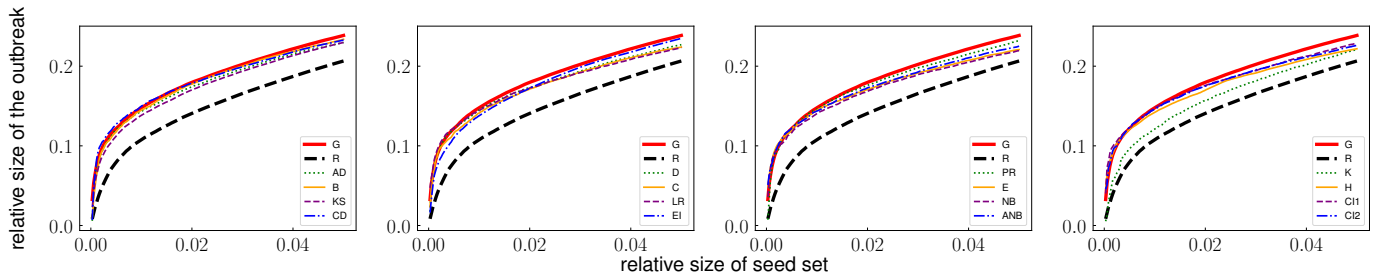

Figure 147: Wesleyan -  $p=1.0p_c$

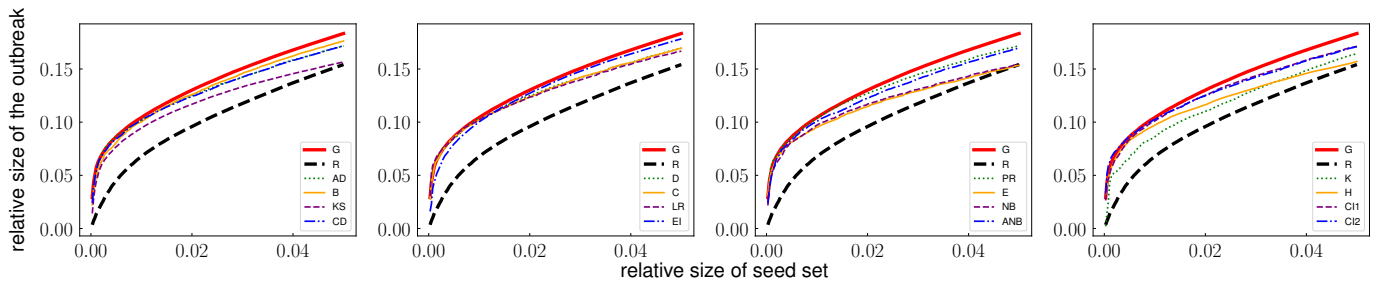

Figure 148: Mich -  $p=1.0p_c$

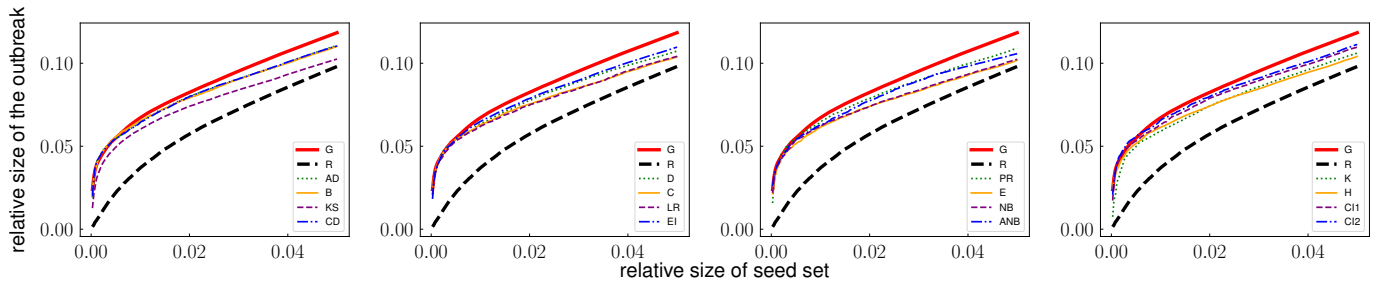

Figure 149: Bitcoin Alpha -  $p=1.0p_c$

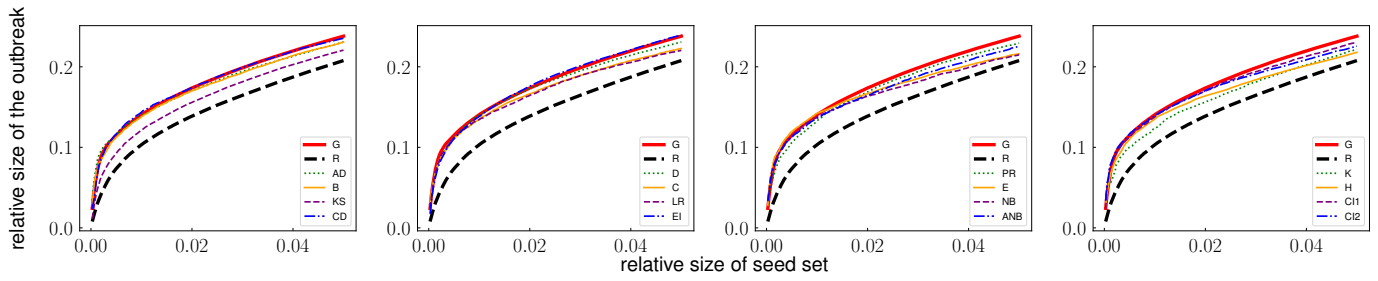

Figure 150: Bucknell -  $p=1.0p_c$

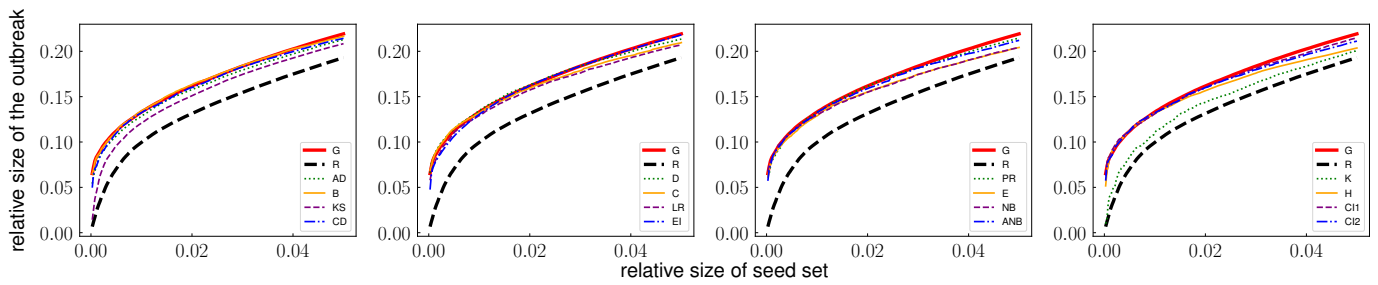

Figure 151: Brandeis -  $p=1.0p_c$

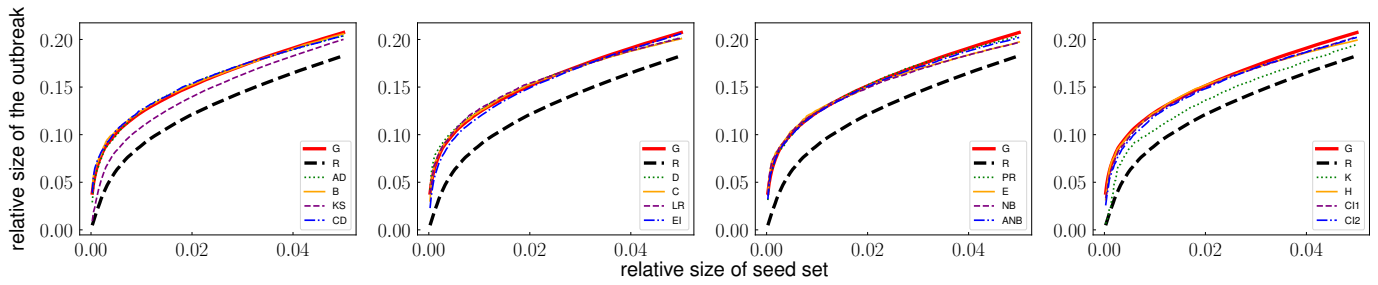

Figure 152: Howard -  $p=1.0p_c$

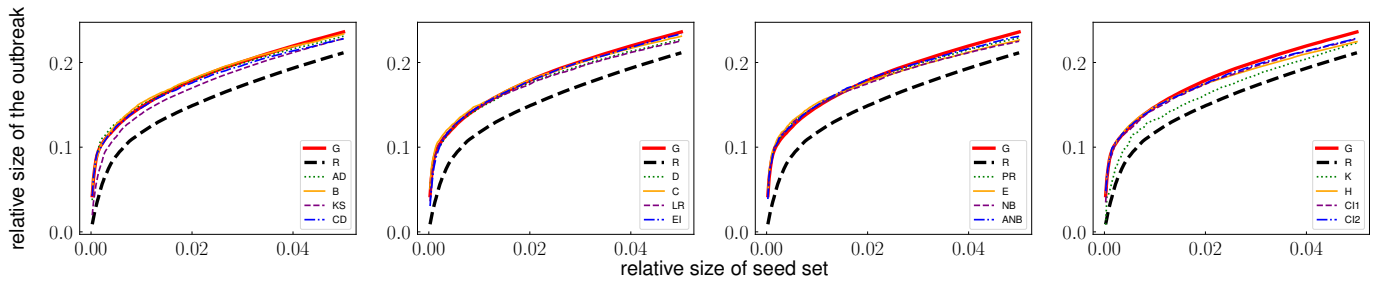

Figure 153: Rice -  $p=1.0p_c$

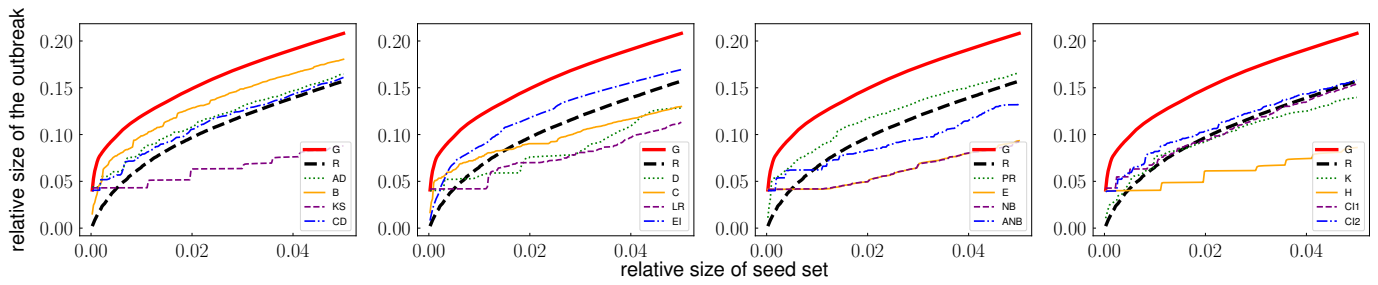

Figure 154: GR-QC, 1993-2003 -  $p=1.0p_c$

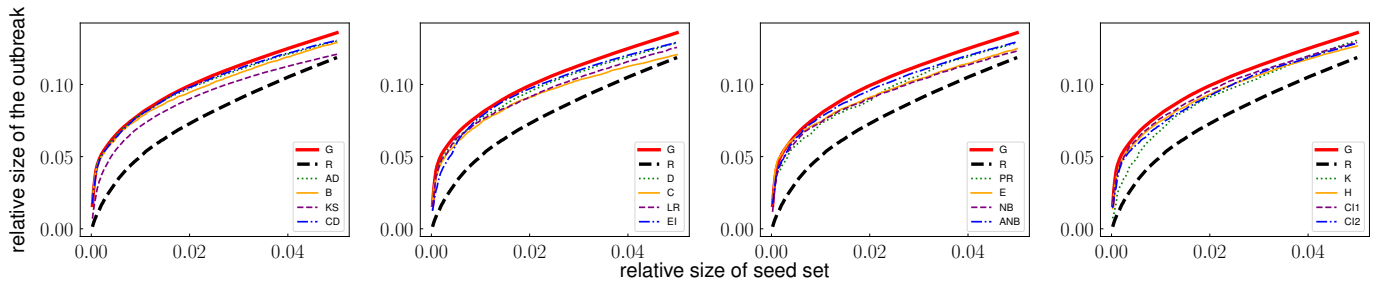

Figure 155: Tennis -  $p=1.0p_c$

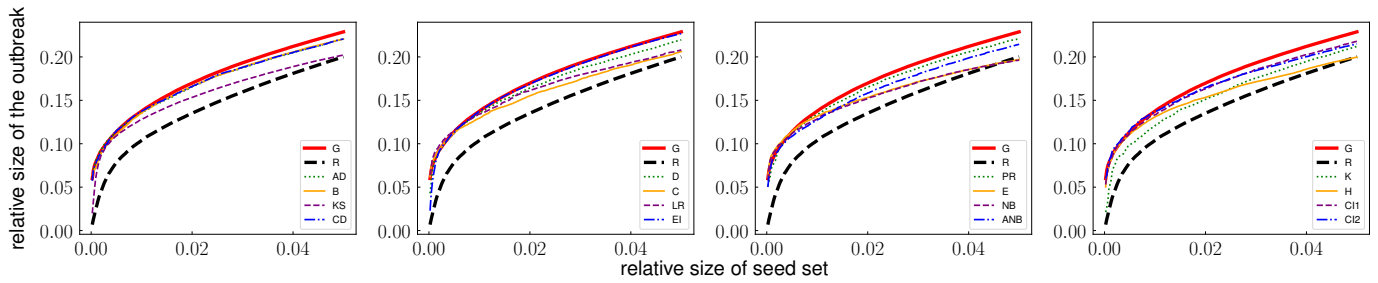

Figure 156: Rochester -  $p=1.0p_c$

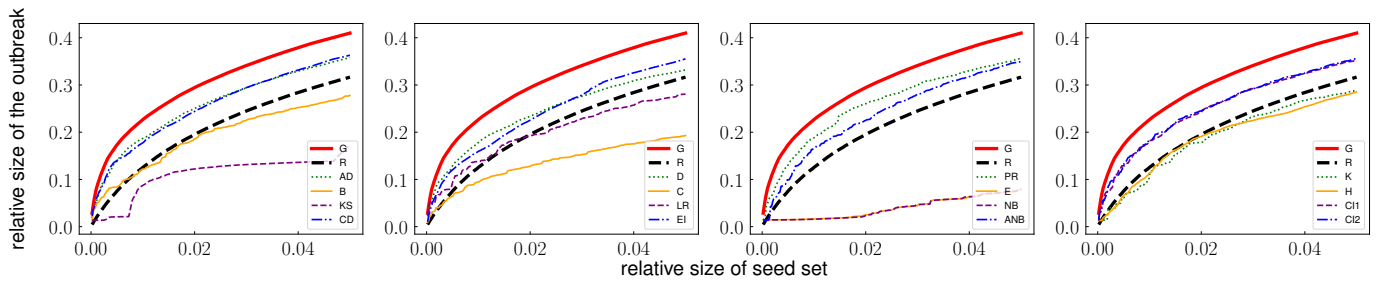

Figure 157: US Power grid -  $p=1.0p_c$



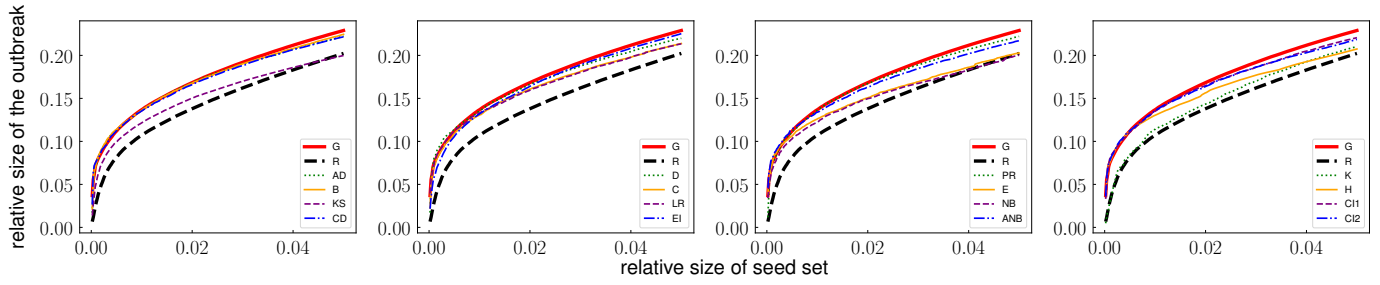

Figure 158: Lehigh -  $p=1.0p_c$

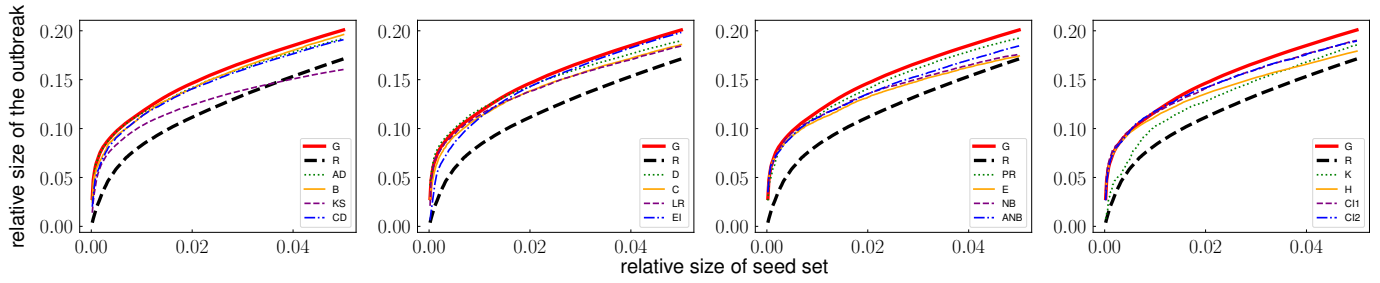

Figure 159: Johns Hopkins -  $p=1.0p_c$

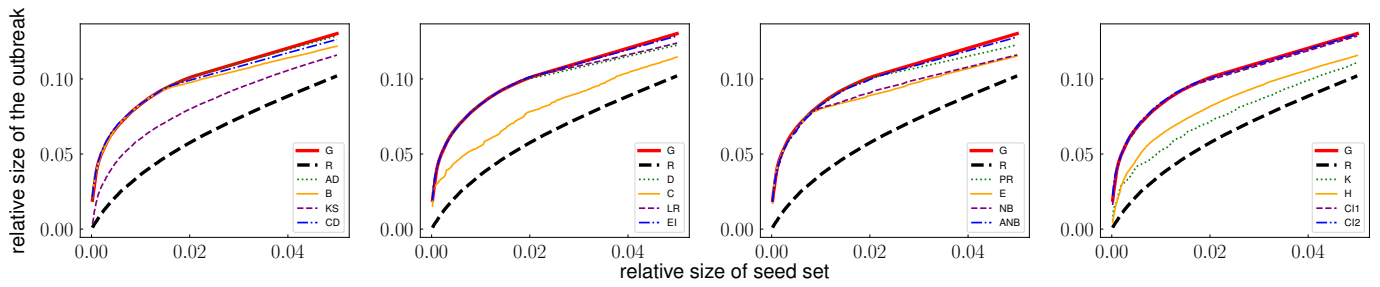

Figure 160: HT09 -  $p=1.0p_c$

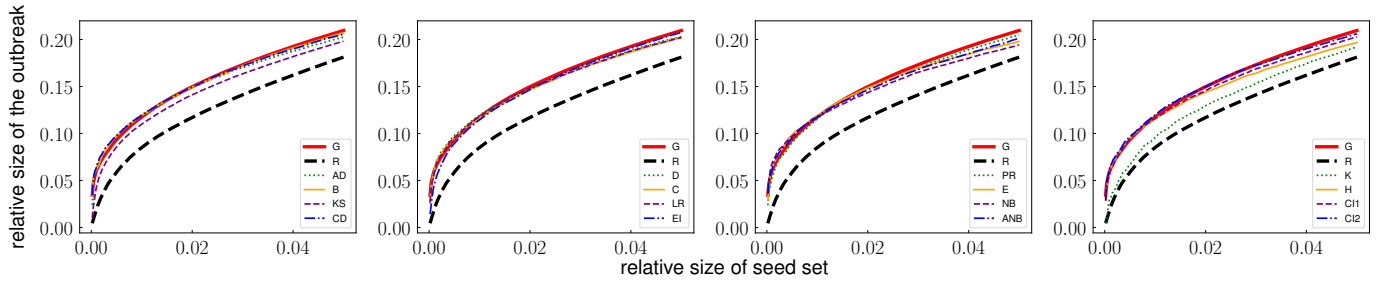

Figure 161: Wake -  $p=1.0p_c$

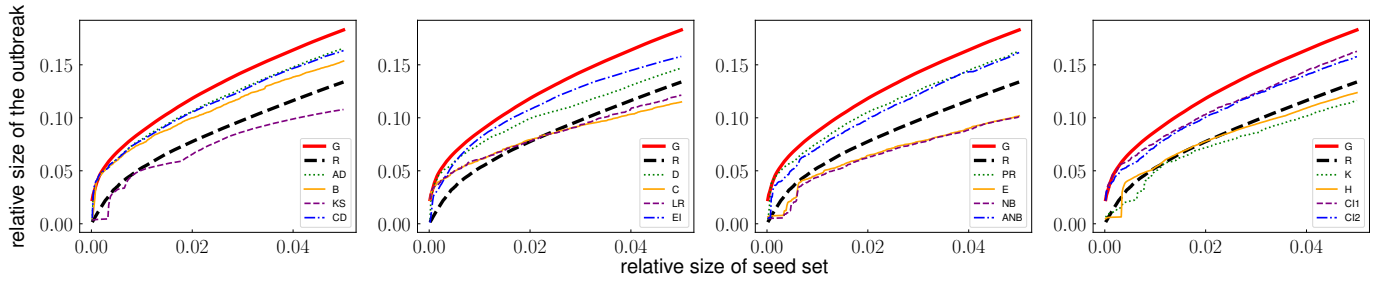

Figure 162: Hep-Th, 1995-1999 -  $p=1.0p_c$

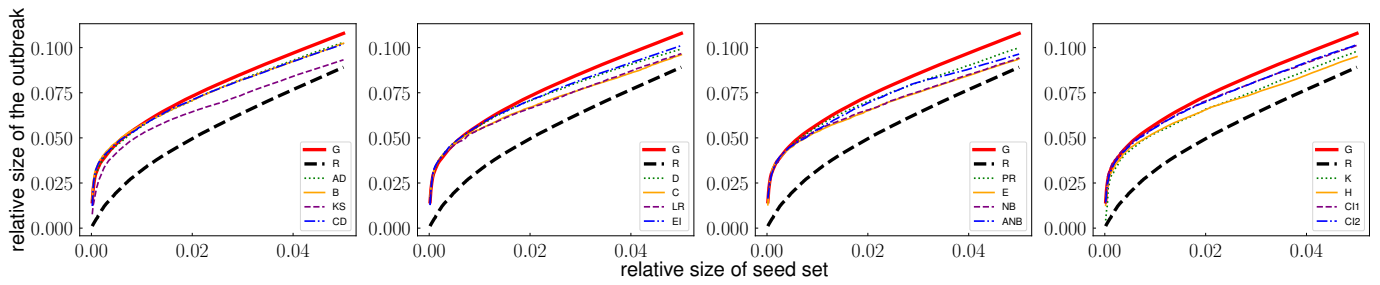

Figure 163: Bitcoin OTC -  $p=1.0p_c$

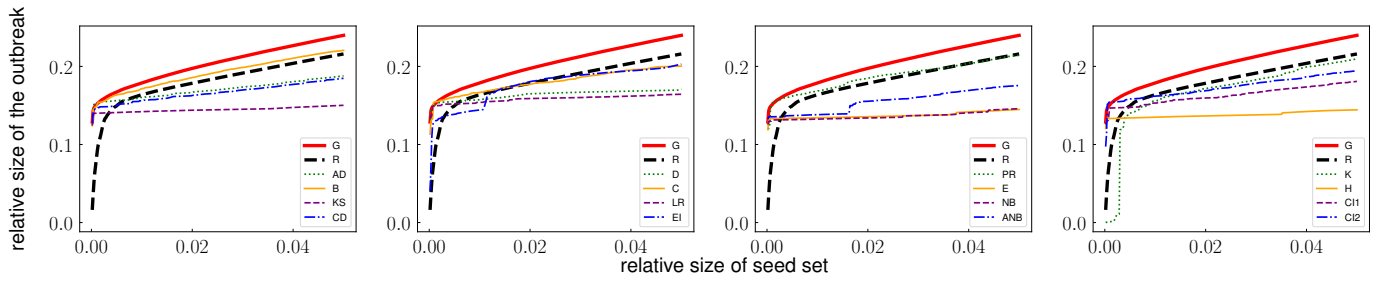

Figure 164: Reactome -  $p=1.0p_c$

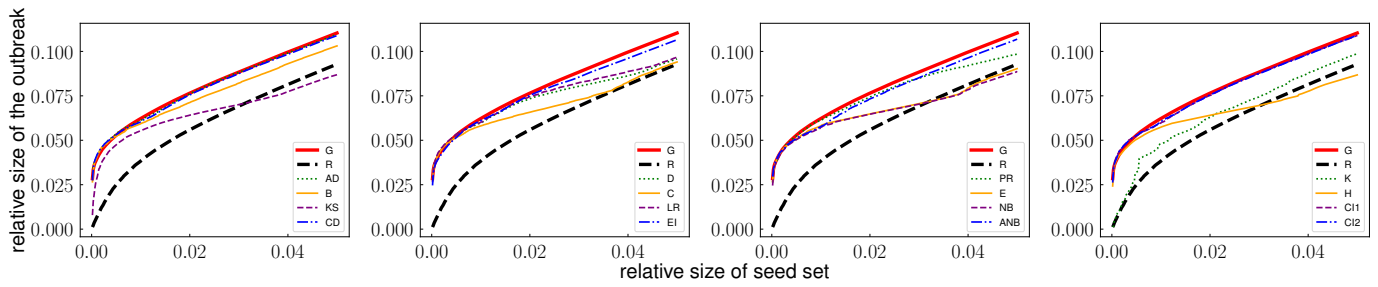

Figure 165: Jung -  $p=1.0p_c$

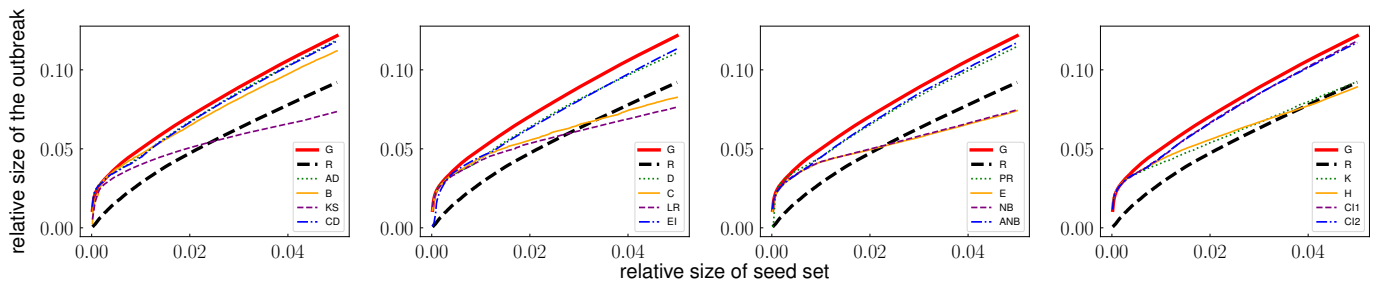

Figure 166: Gnutella, Aug. 8, 2002 -  $p=1.0p_c$

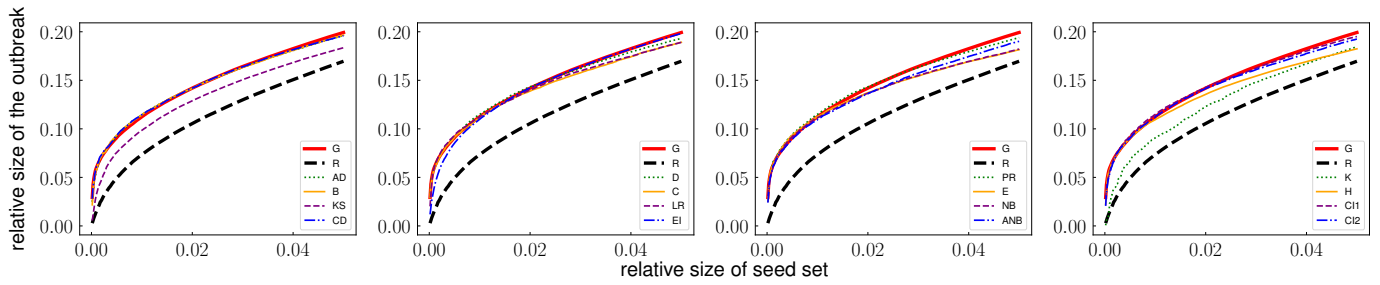

Figure 167: American -  $p=1.0p_c$

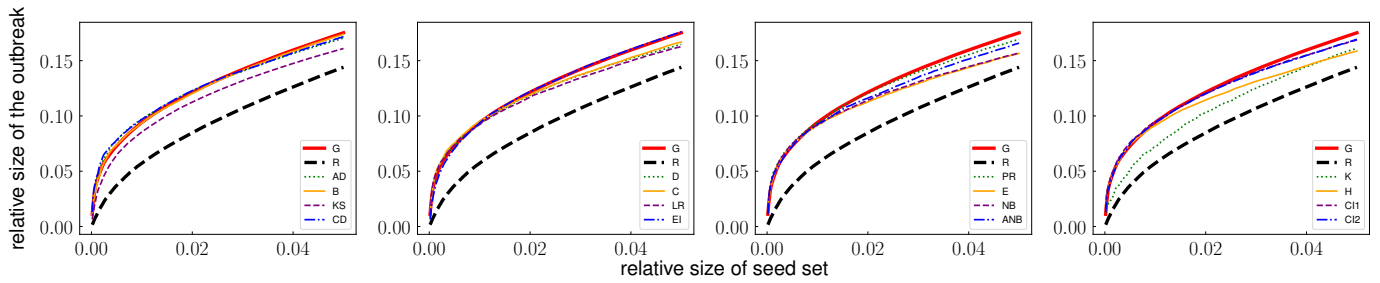

Figure 168: MIT -  $p=1.0p_c$

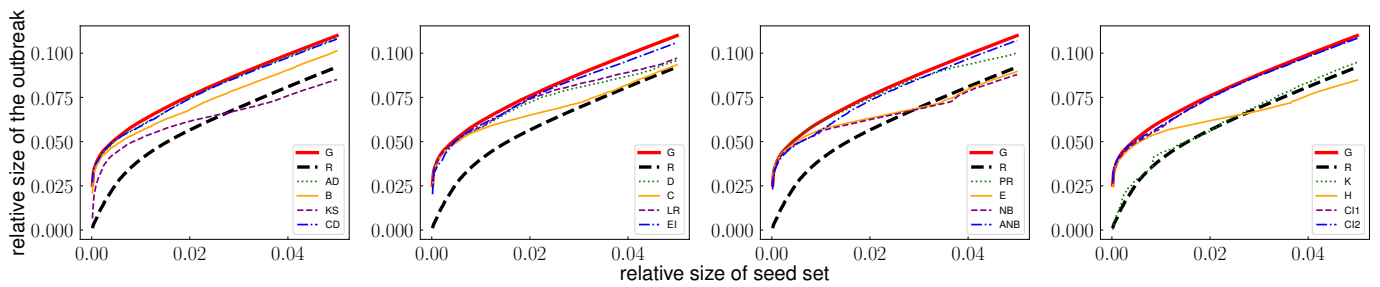

Figure 169: JDK -  $p=1.0p_c$

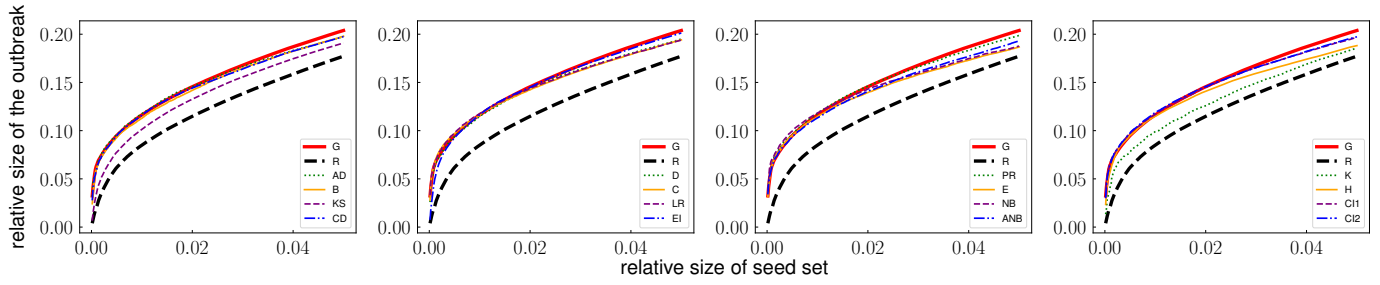

Figure 170: William -  $p=1.0p_c$

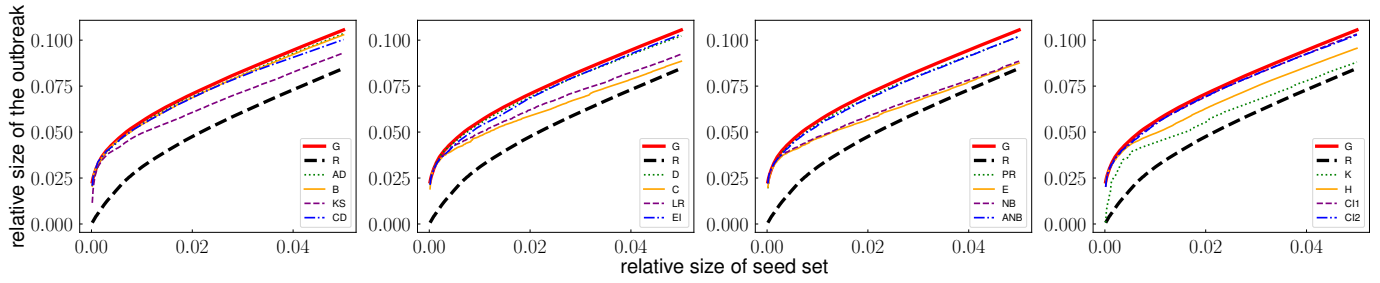

Figure 171: AS Oregon -  $p=1.0p_c$

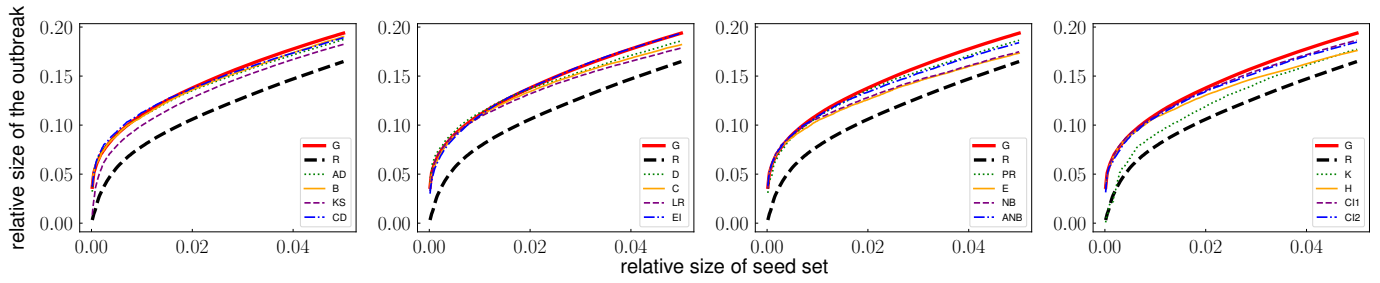

Figure 172: UChicago -  $p=1.0p_c$

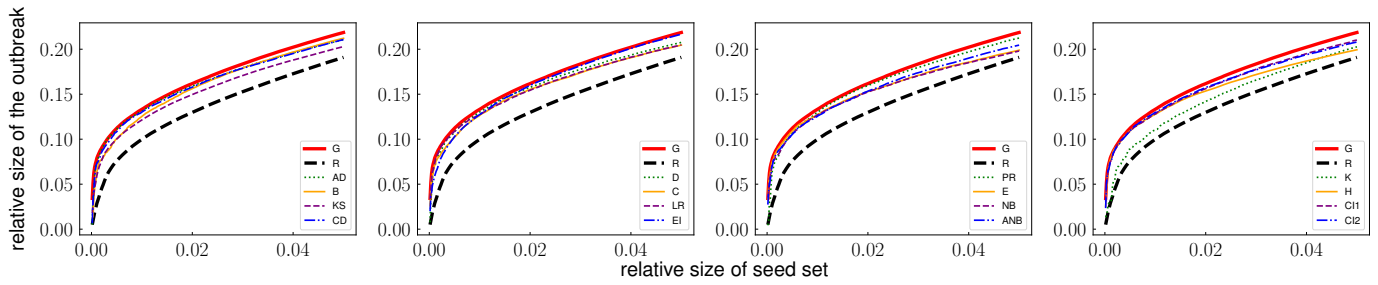

Figure 173: Princeton -  $p=1.0p_c$

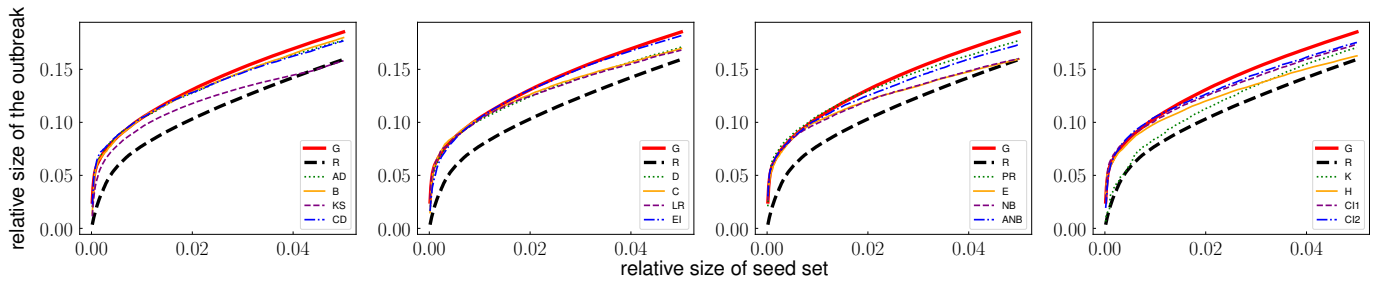

Figure 174: Carnegie -  $p=1.0p_c$

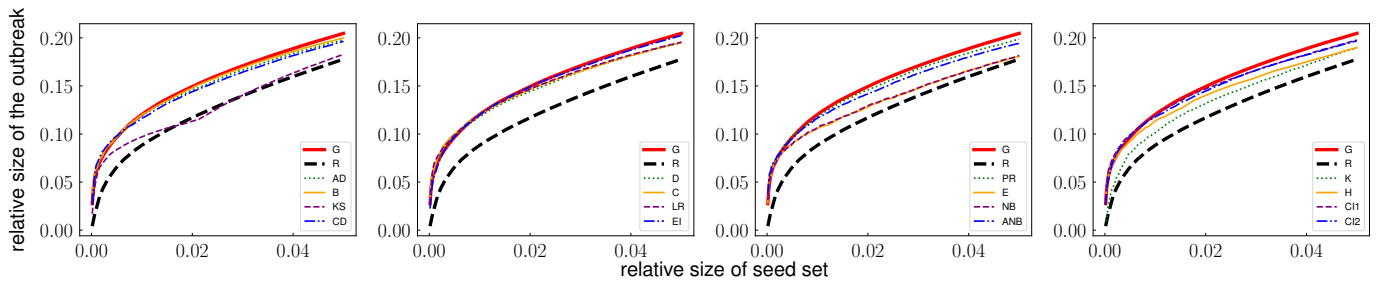

Figure 175: Tufts -  $p=1.0p_c$

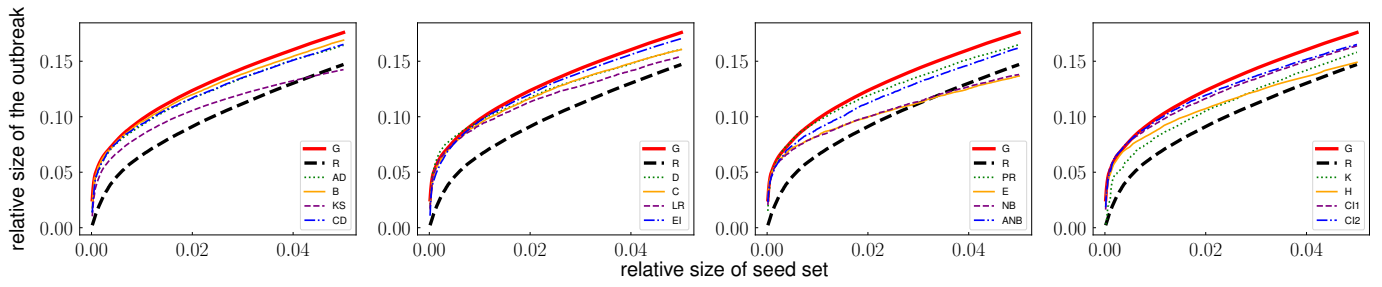

Figure 176: UC -  $p=1.0p_c$

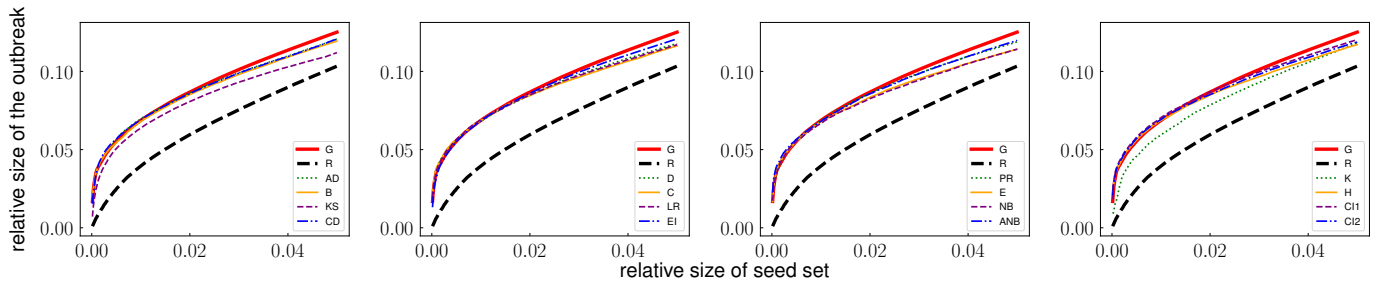

Figure 177: Wikipedia elections -  $p=1.0p_c$

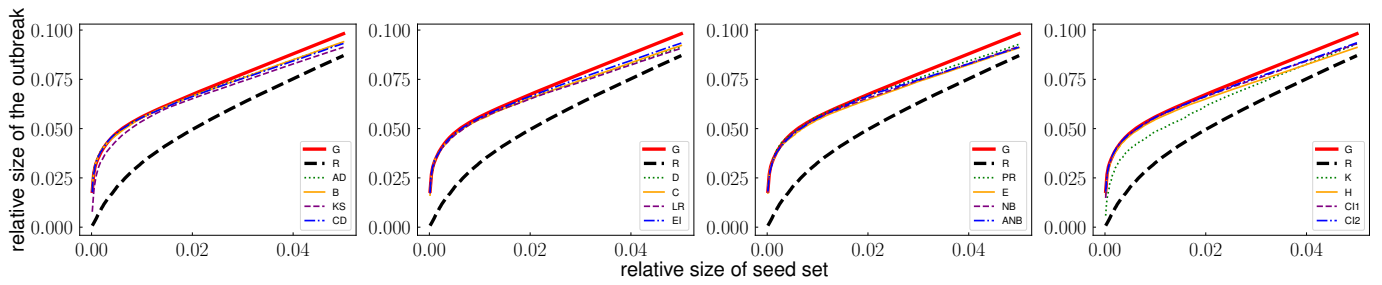

Figure 178: English -  $p=1.0p_c$

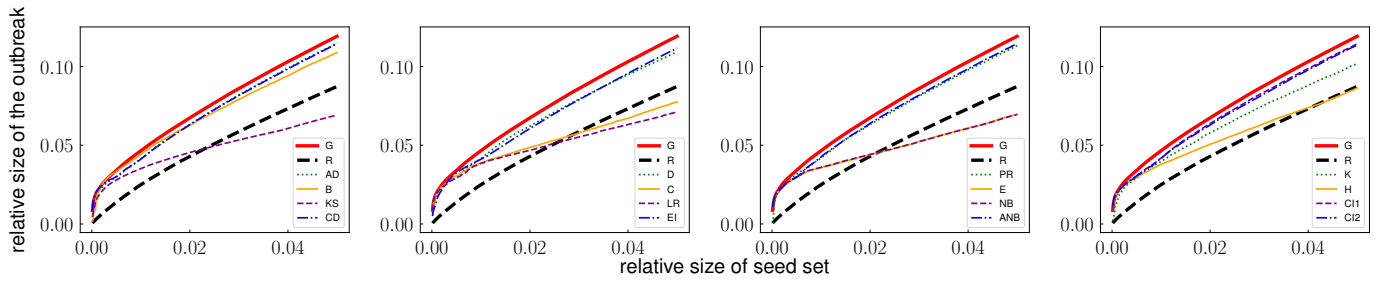

Figure 179: Gnutella, Aug. 9, 2002 -  $p=1.0p_c$

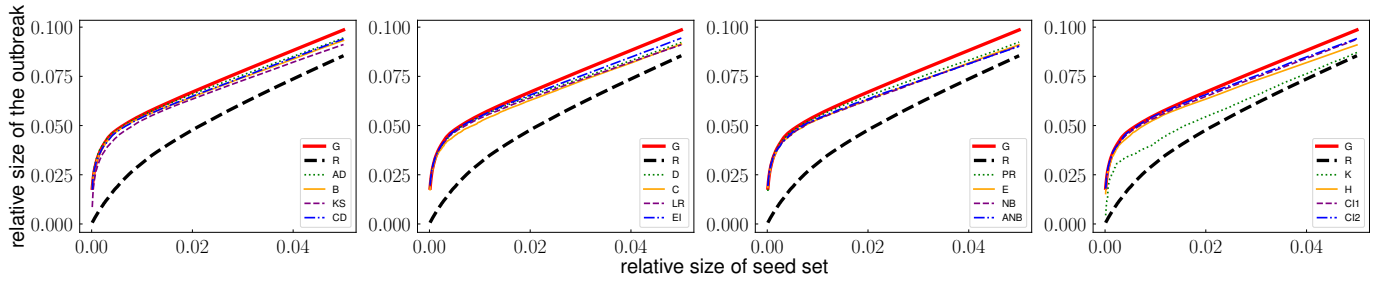

Figure 180: French -  $p=1.0p_c$

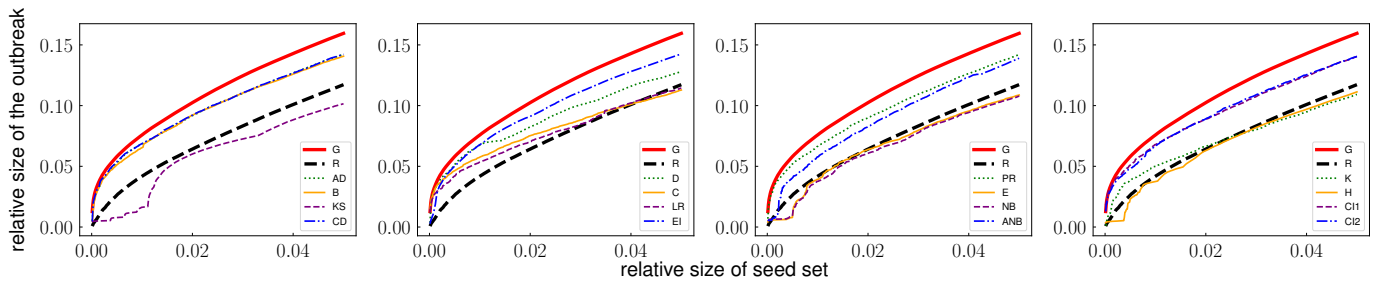

Figure 181: Hep-Th, 1993-2003 -  $p=1.0p_c$



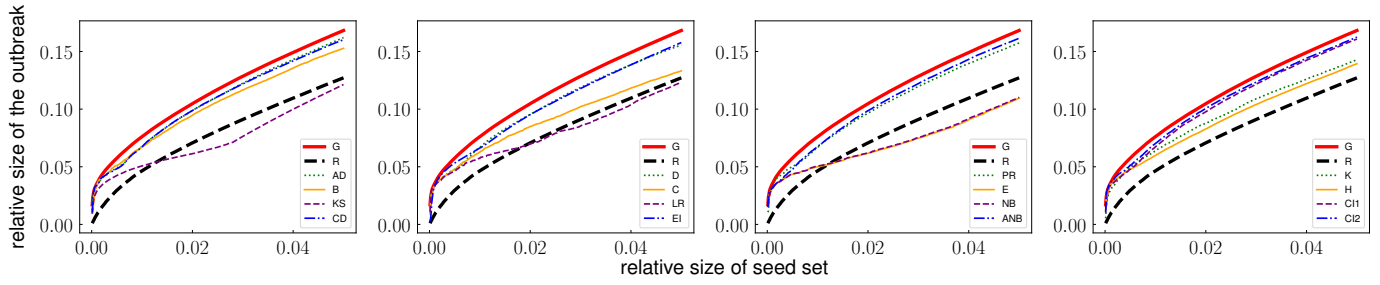

Figure 182: Gnutella, Aug. 6, 2002 -  $p=1.0p_c$

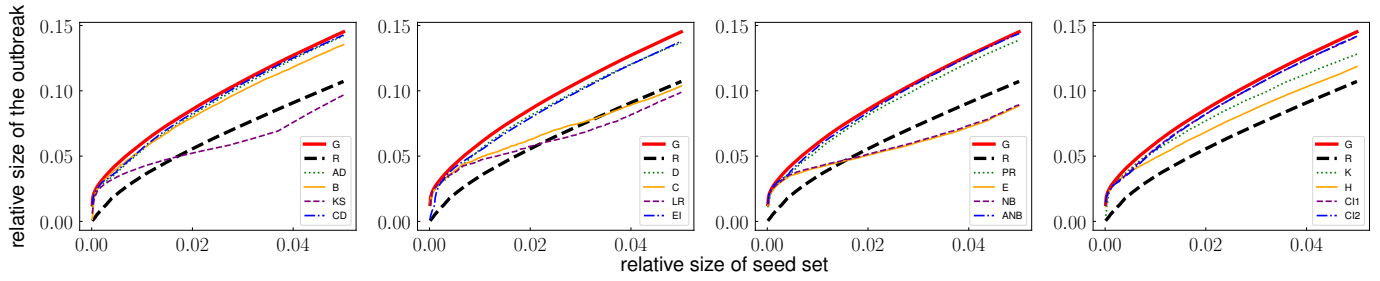

Figure 183: Gnutella, Aug. 5, 2002 -  $p=1.0p_c$

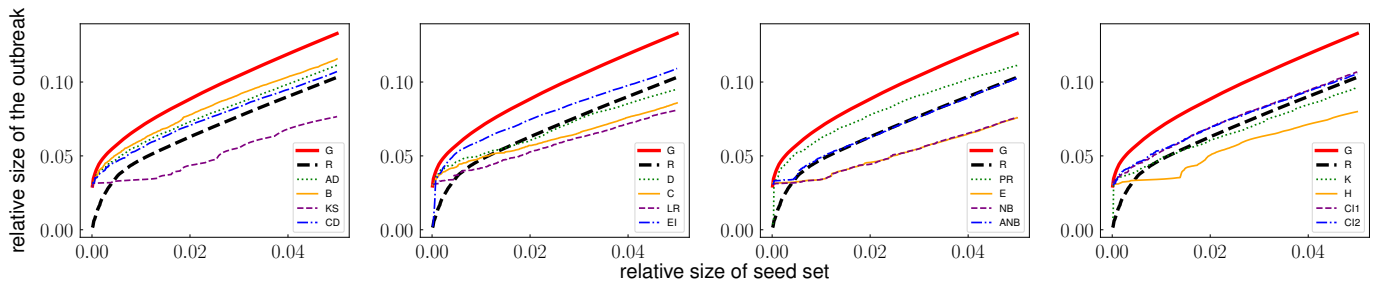

Figure 184: PGP -  $p=1.0p_c$

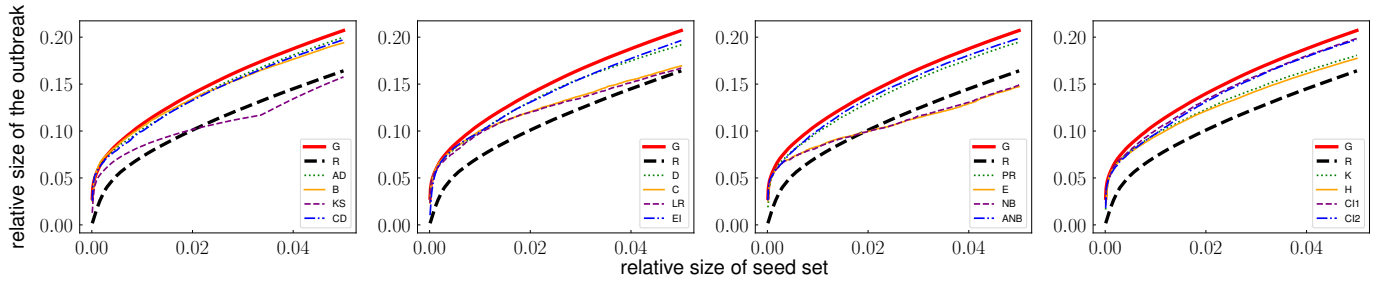

Figure 185: Gnutella, Aug. 4, 2002 -  $p=1.0p_c$

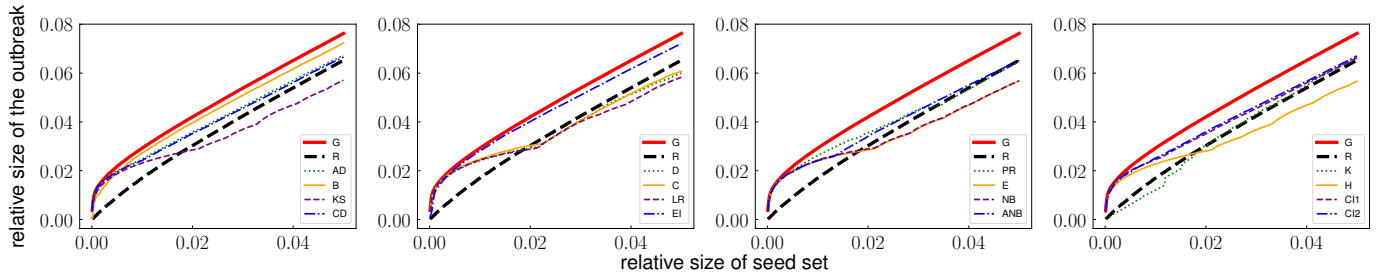

Figure 186: Hep-Ph, 1993-2003 -  $p=1.0p_c$

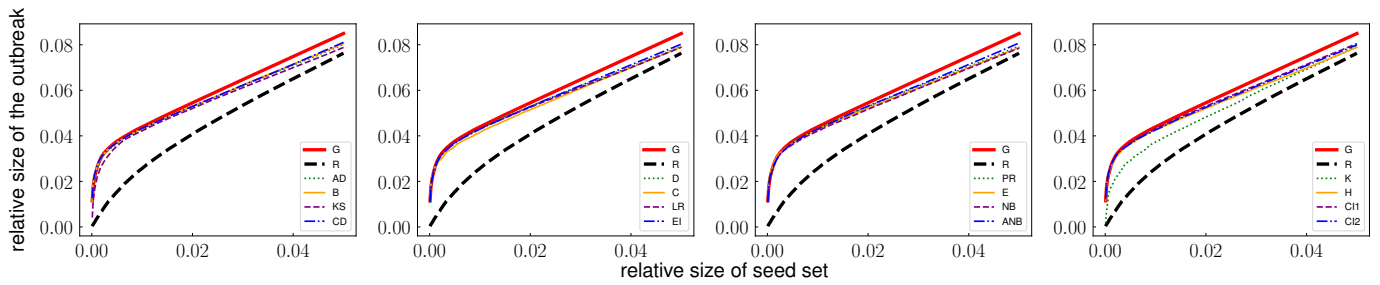

Figure 187: Spanish 1 -  $p=1.0p_c$

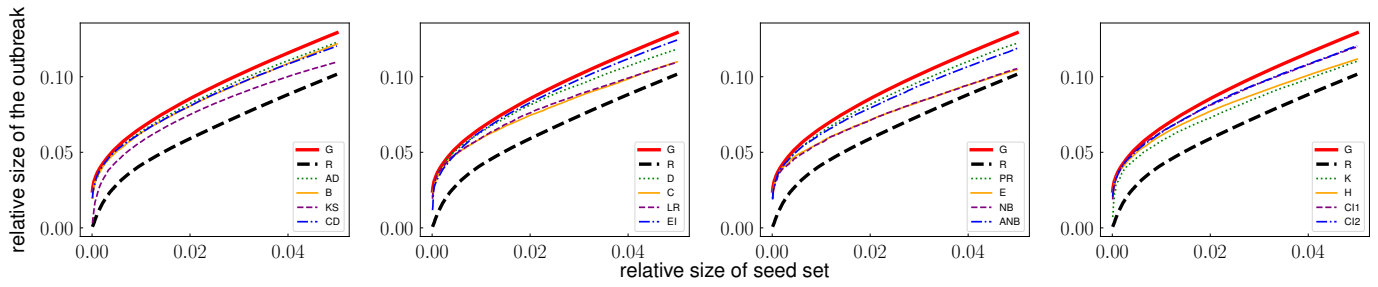

Figure 188: DBLP, citations -  $p=1.0p_c$

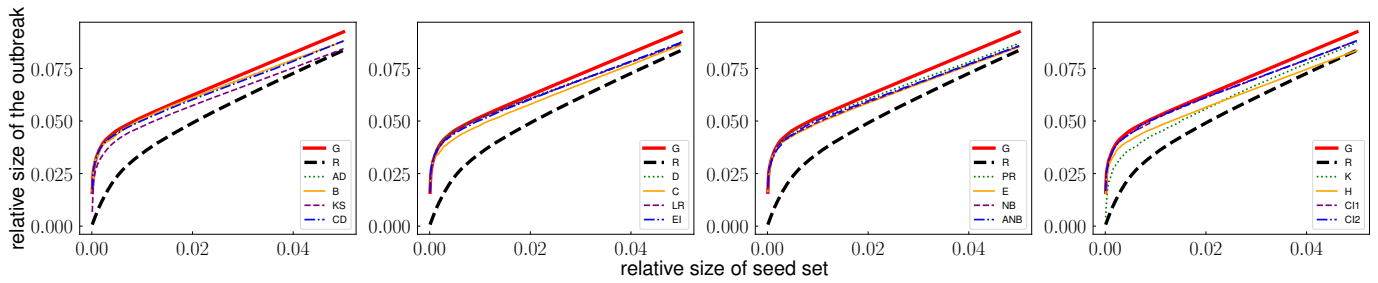

Figure 189: Spanish 2 -  $p=1.0p_c$

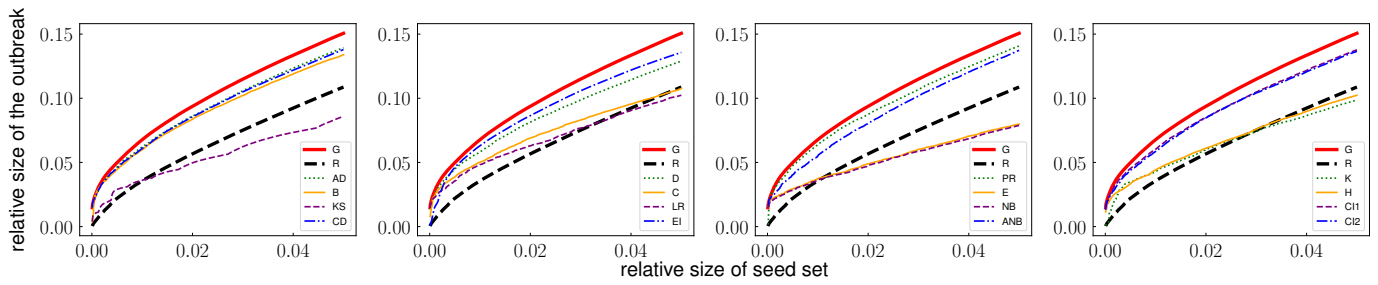

Figure 190: Cond-Mat, 1995-1999 -  $p=1.0p_c$

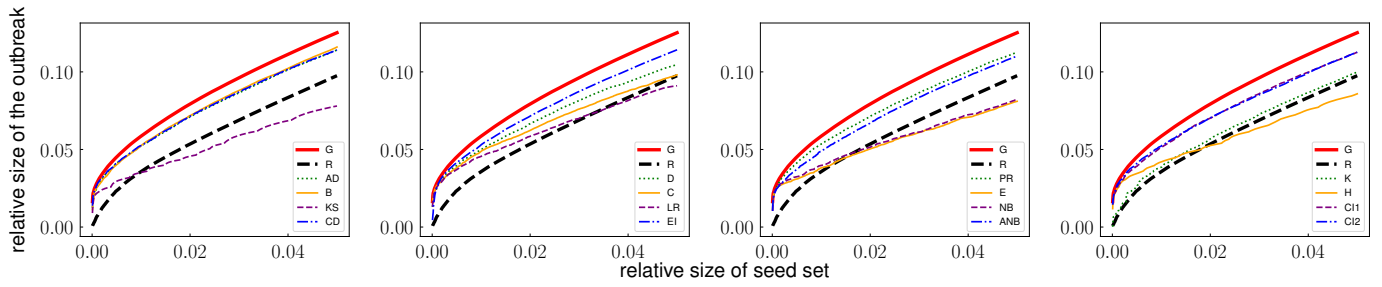

Figure 191: Astrophysics -  $p=1.0p_c$

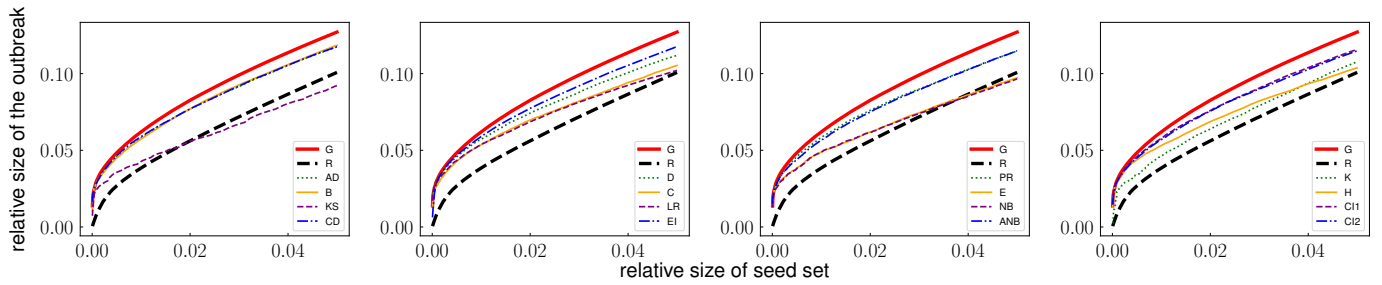

Figure 192: AstroPhys, 1993-2003 -  $p=1.0p_c$

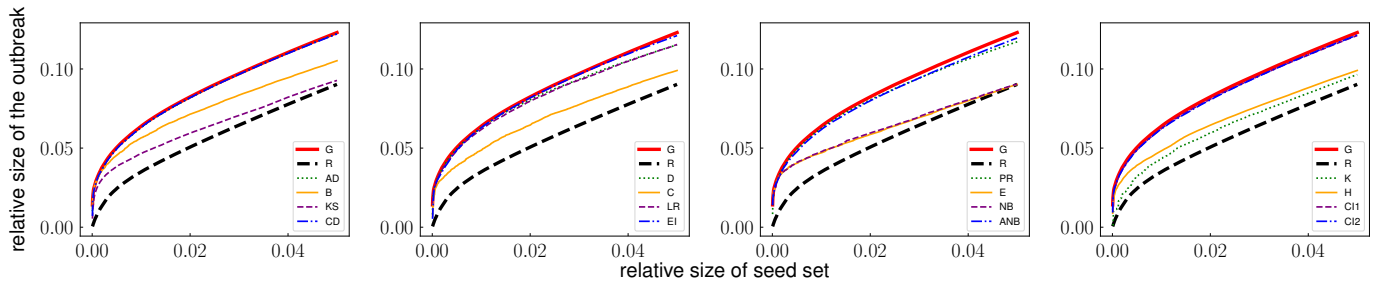

Figure 193: Marvel -  $p=1.0p_c$

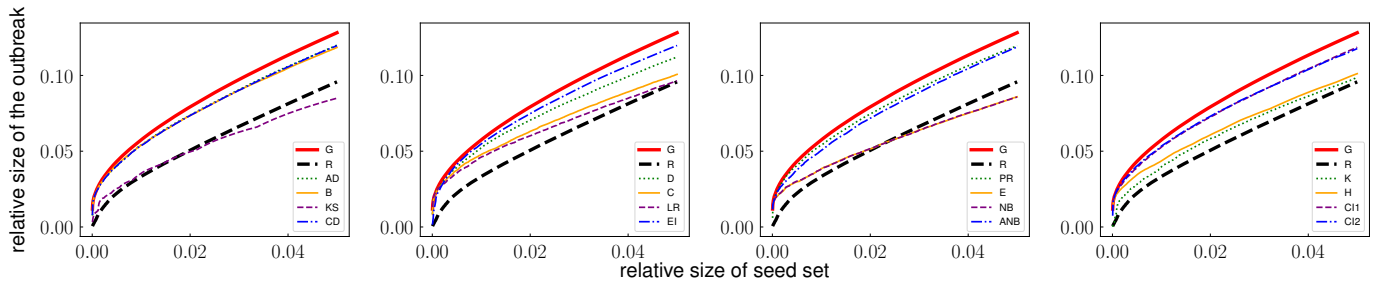

Figure 194: Cond-Mat, 1993-2003 -  $p=1.0p_c$

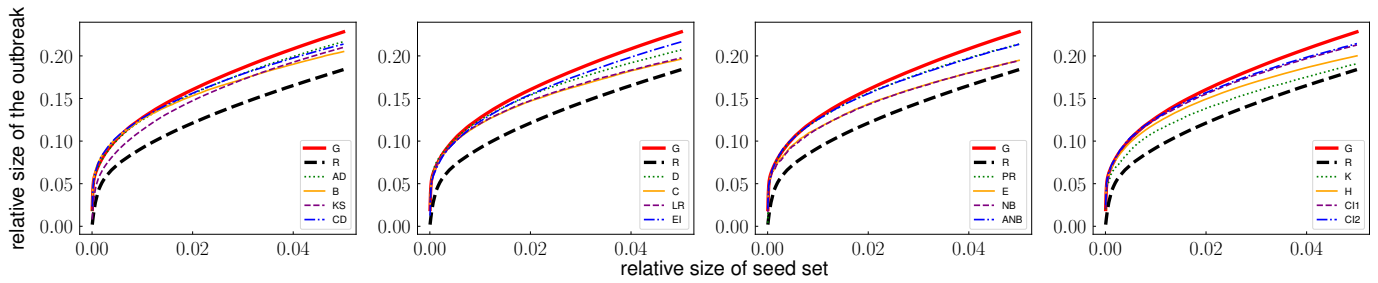

Figure 195: Gnutella, Aug. 25, 2002 -  $p=1.0p_c$

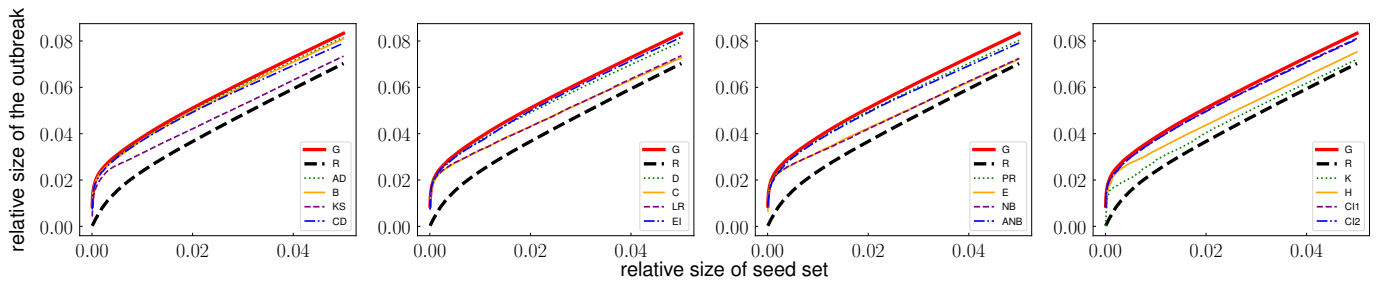

Figure 196: Internet -  $p=1.0p_c$

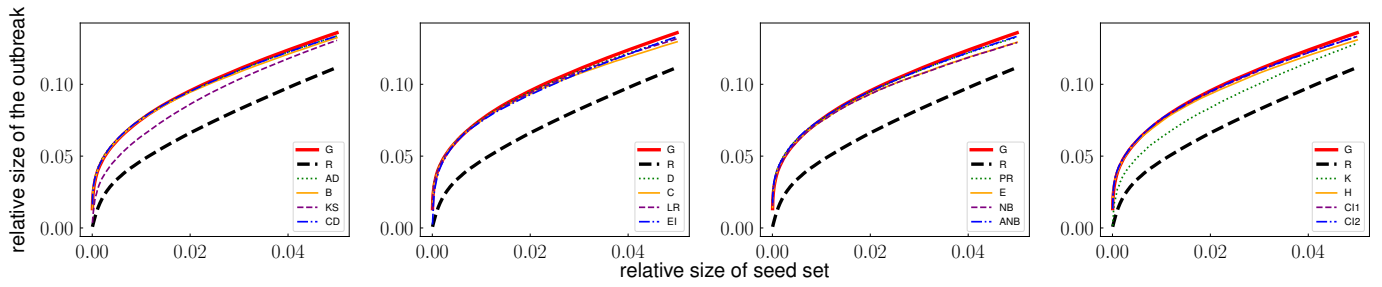

Figure 197: Thesaurus -  $p=1.0p_c$

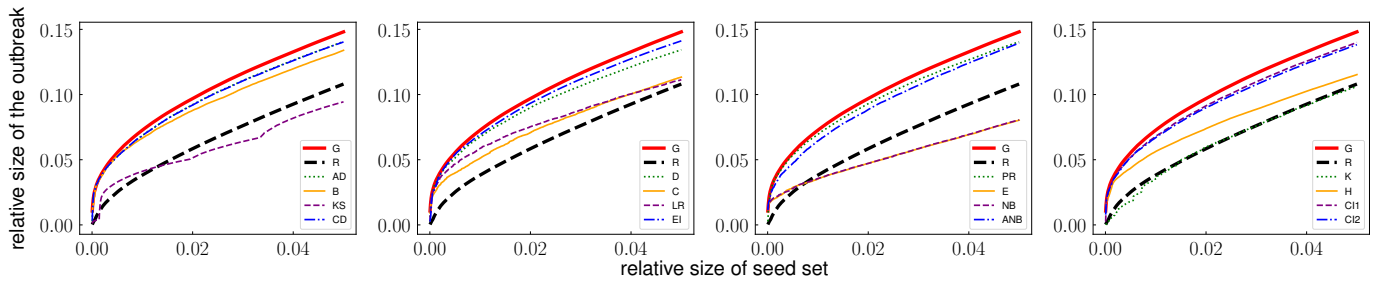

Figure 198: Cora -  $p=1.0p_c$

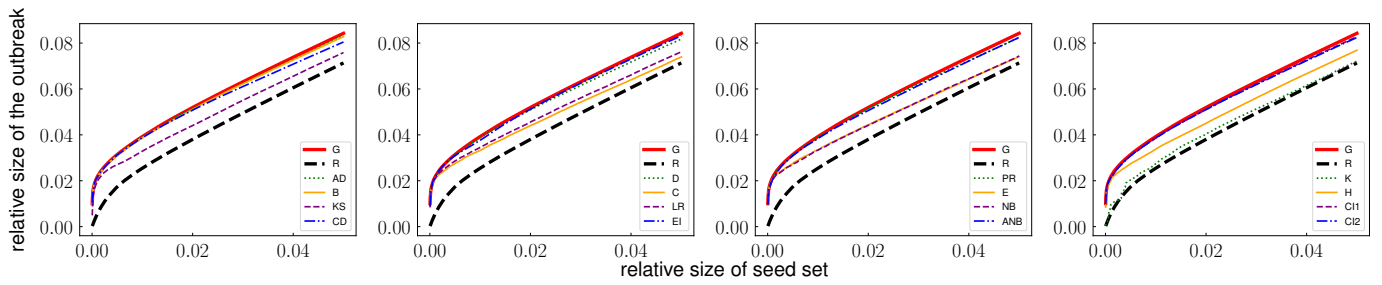

Figure 199: AS Caida -  $p=1.0p_c$

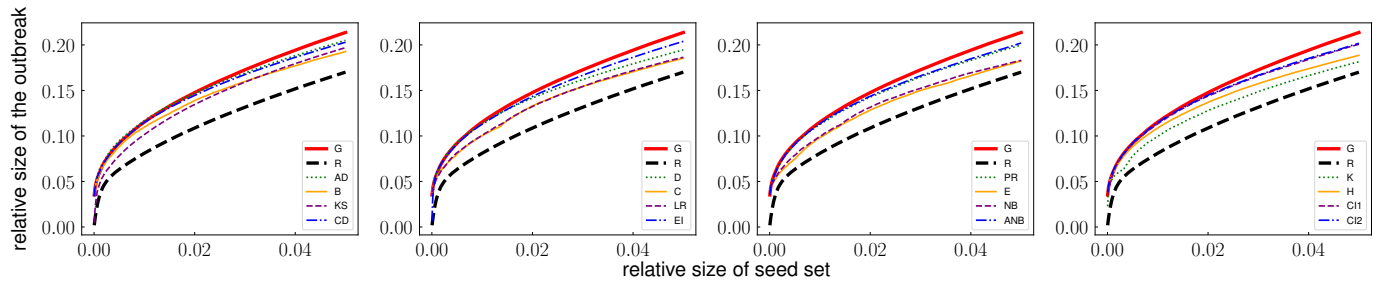

Figure 200: Gnutella, Aug. 24, 2002 -  $p=1.0p_c$

### 2.1.3 Supercritical Regime

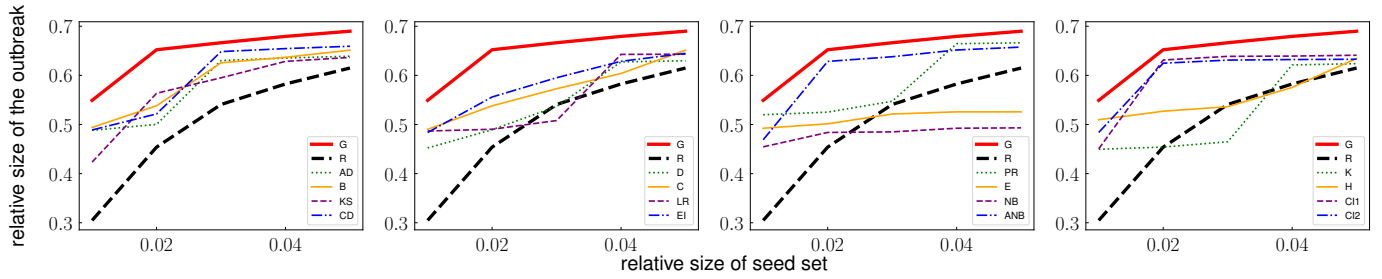

Figure 201: Political books -  $p=2.0p_c$

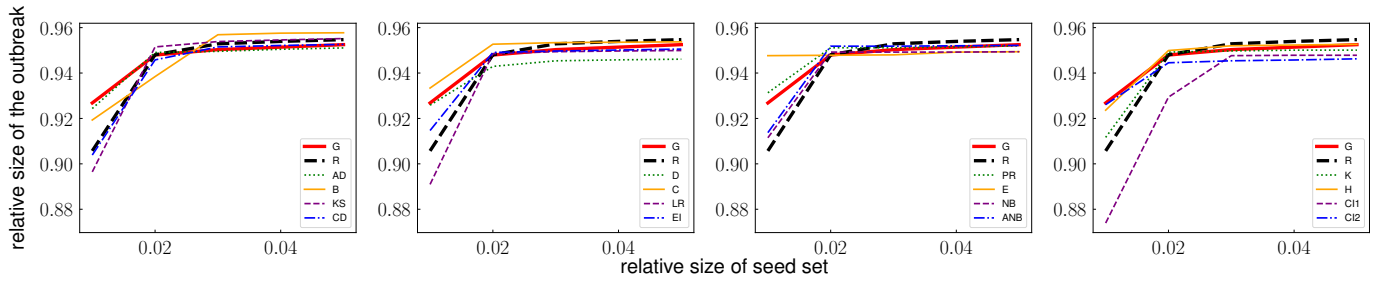

Figure 202: College football -  $p=2.0p_c$

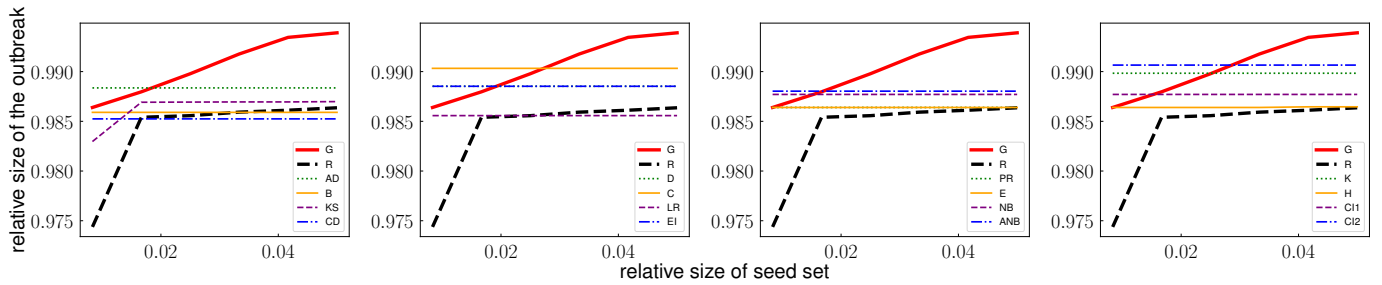

Figure 203: S208 -  $p=2.0p_c$



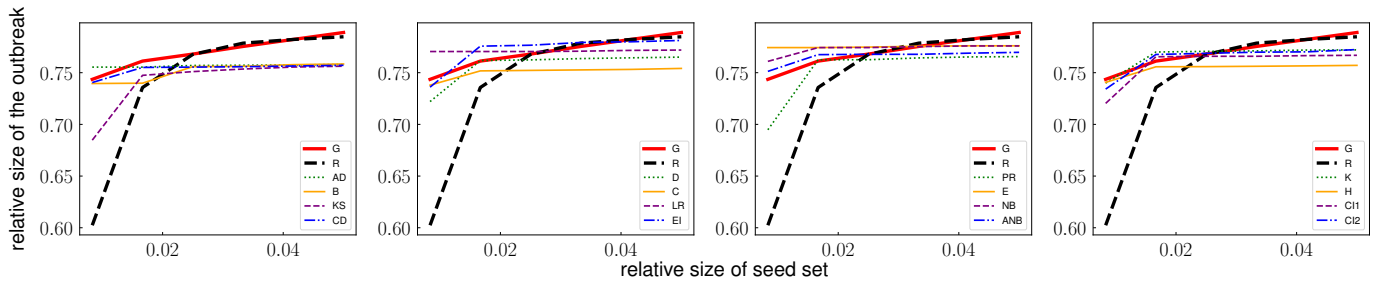

Figure 204: High school, 2011 -  $p=2.0p_c$

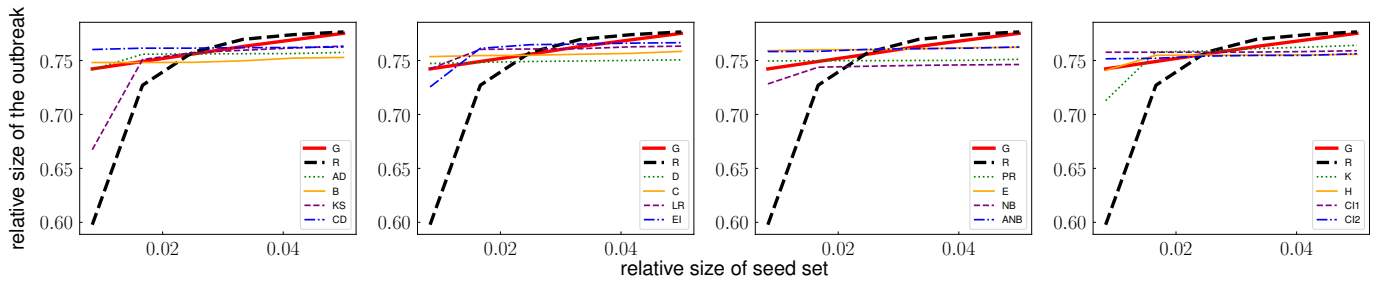

Figure 205: Bay Dry -  $p=2.0p_c$

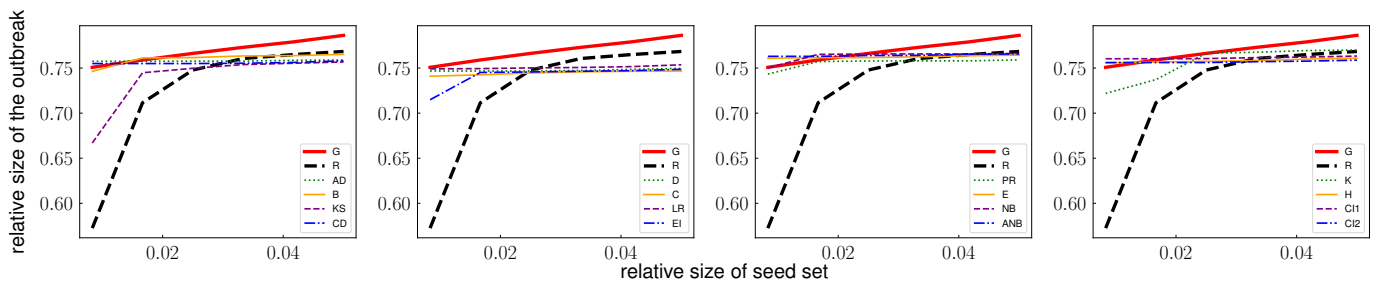

Figure 206: Bay Wet -  $p=2.0p_c$

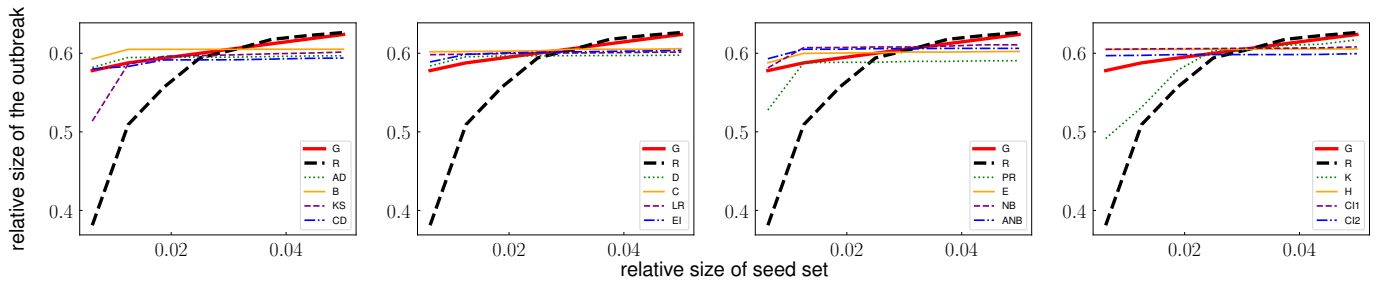

Figure 207: Radoslaw Email -  $p=2.0p_c$

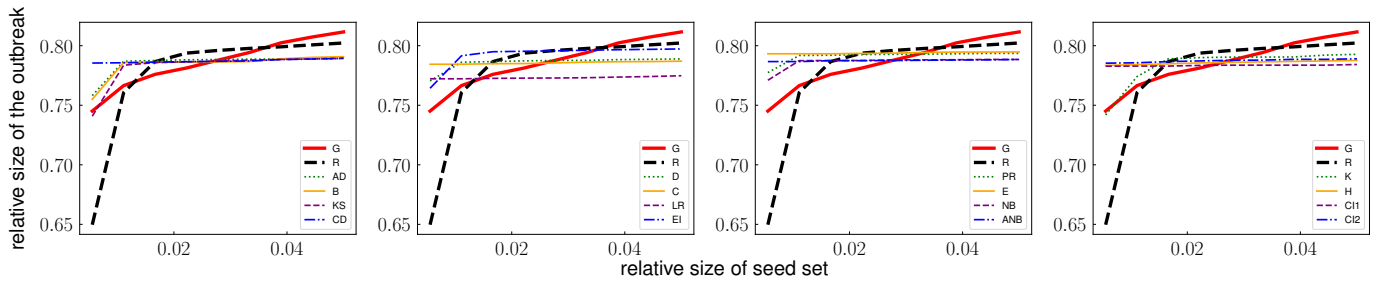

Figure 208: High school, 2012 -  $p=2.0p_c$

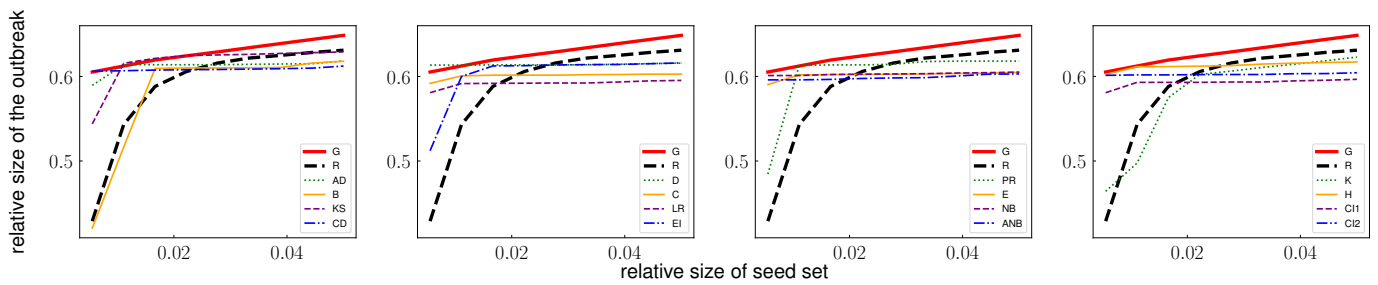

Figure 209: Little Rock Lake -  $p=2.0p_c$

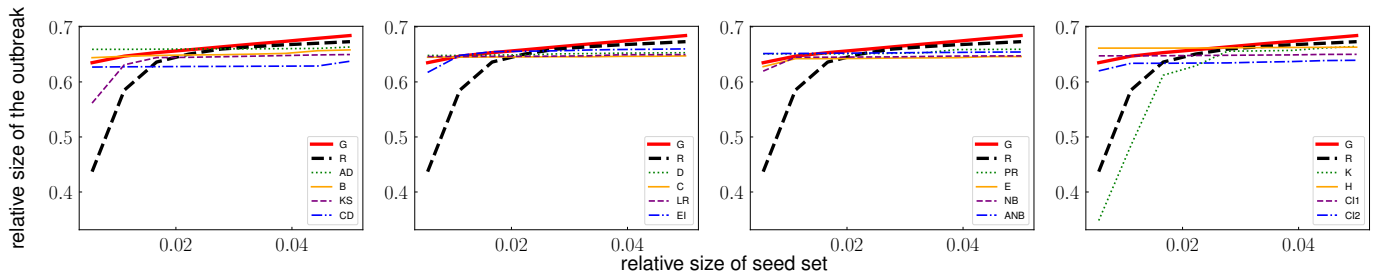

Figure 210: Jazz -  $p=2.0p_c$

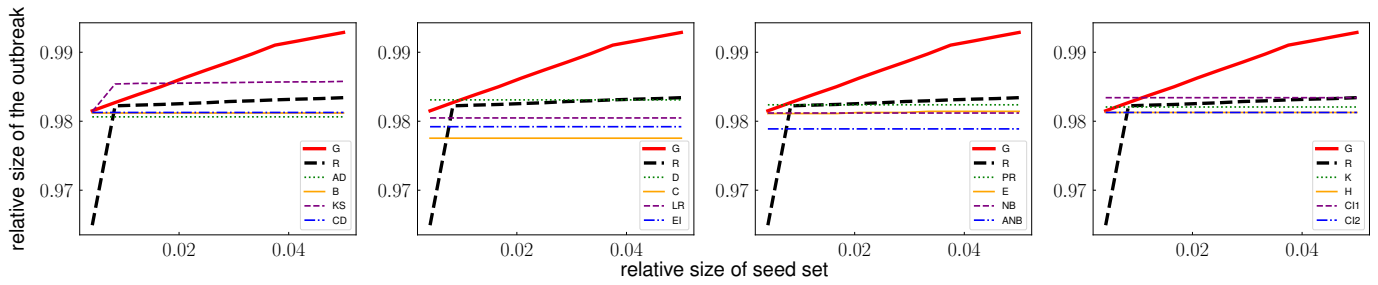

Figure 211: S420 -  $p=2.0p_c$

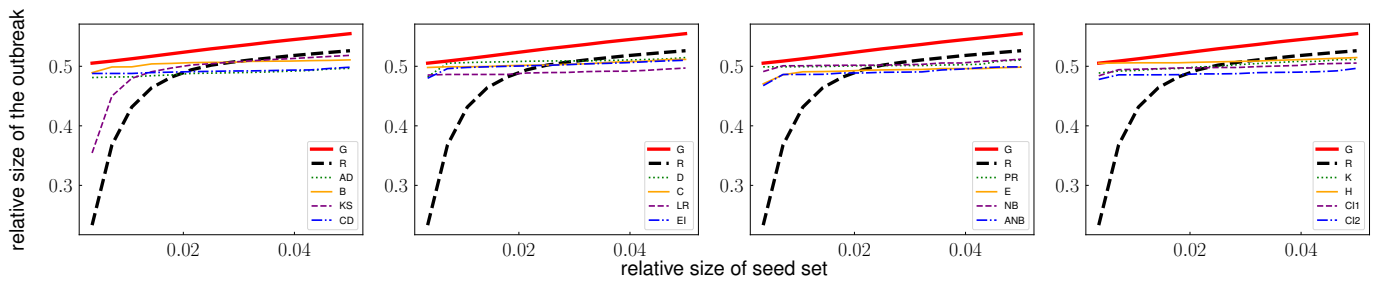

Figure 212: C. Elegans, neural -  $p=2.0p_c$

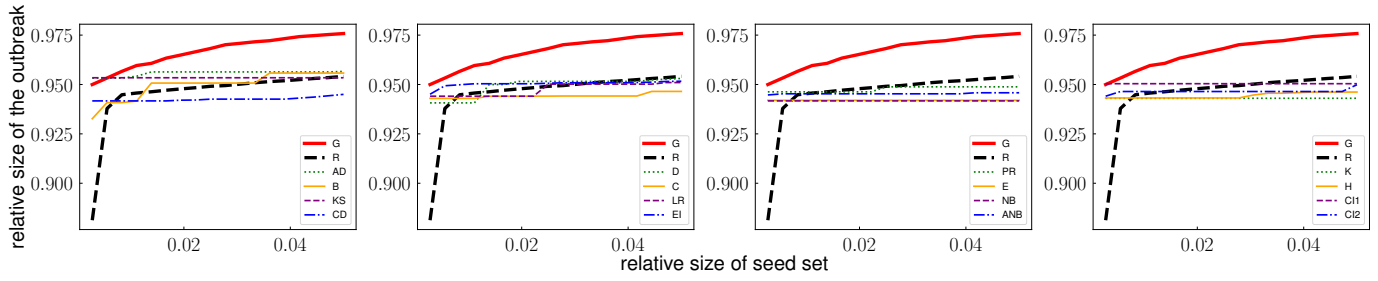

Figure 213: Network Science -  $p=2.0p_c$

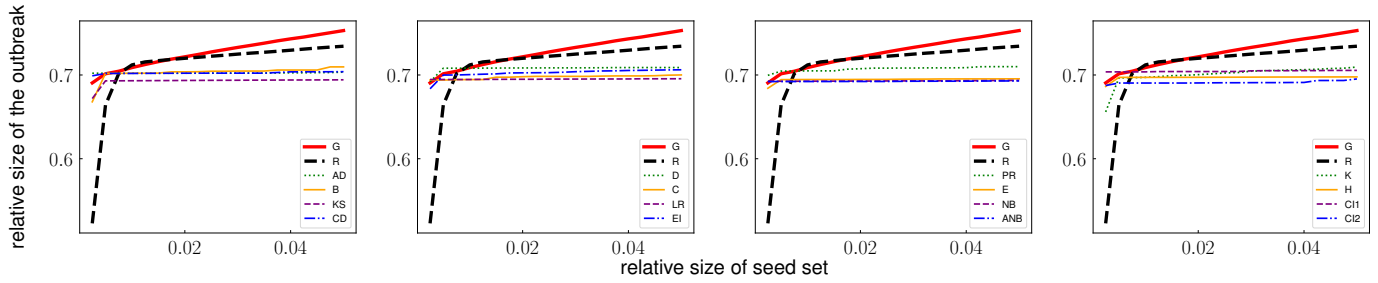

Figure 214: Dublin -  $p=2.0p_c$

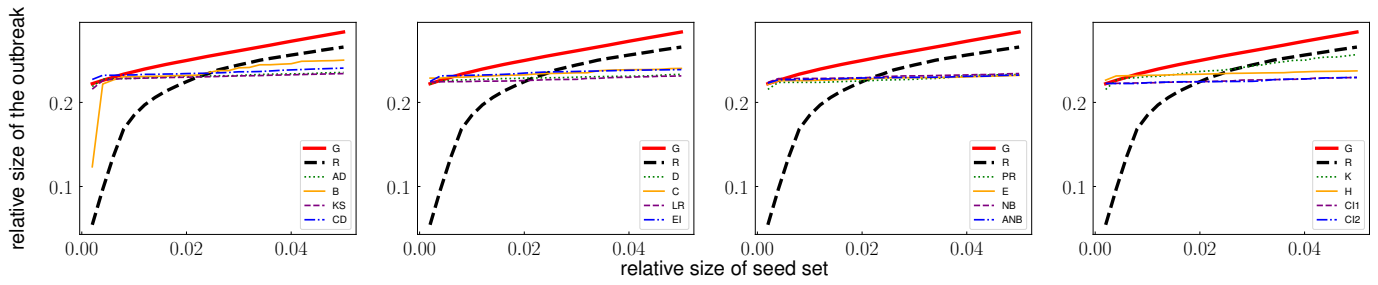

Figure 215: US Air Transportation -  $p=2.0p_c$

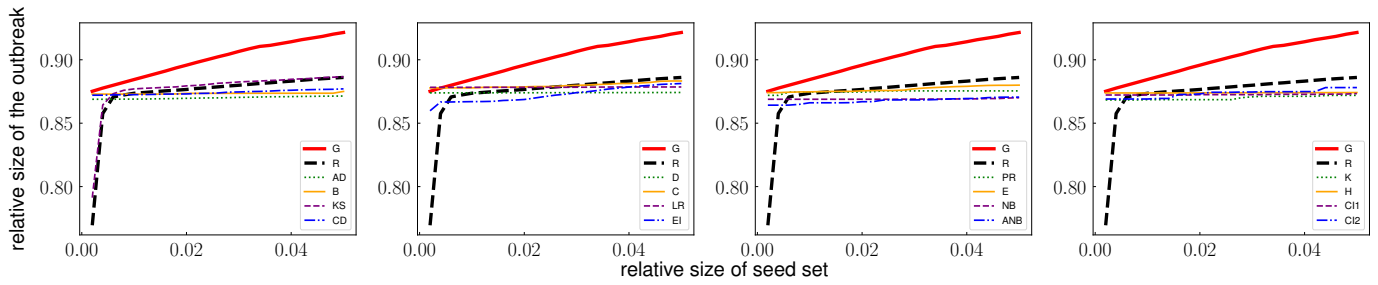

Figure 216: S838 -  $p=2.0p_c$

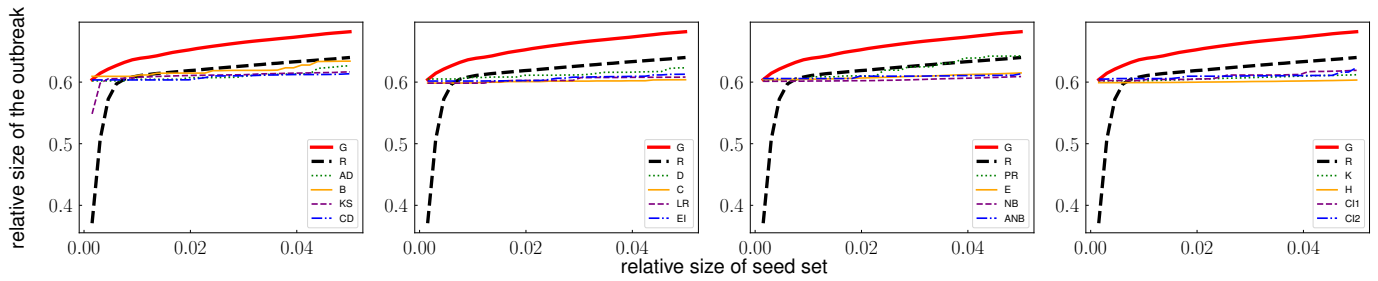

Figure 217: Yeast, transcription -  $p=2.0p_c$

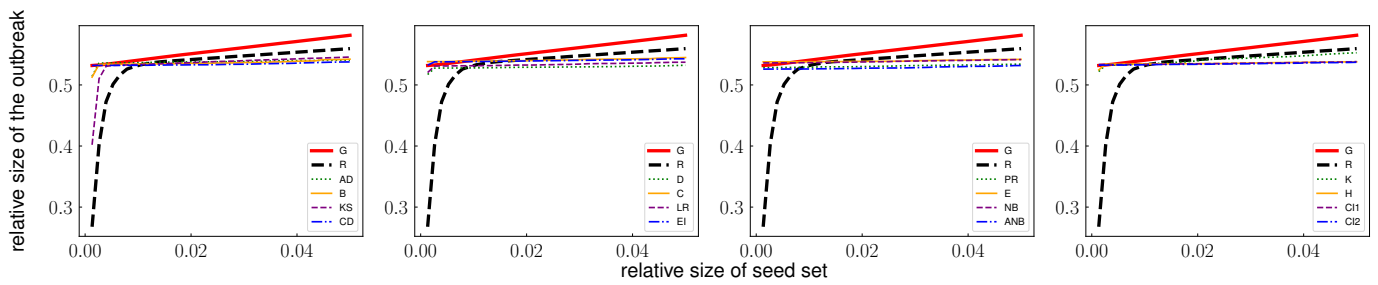

Figure 218: Caltech -  $p=2.0p_c$

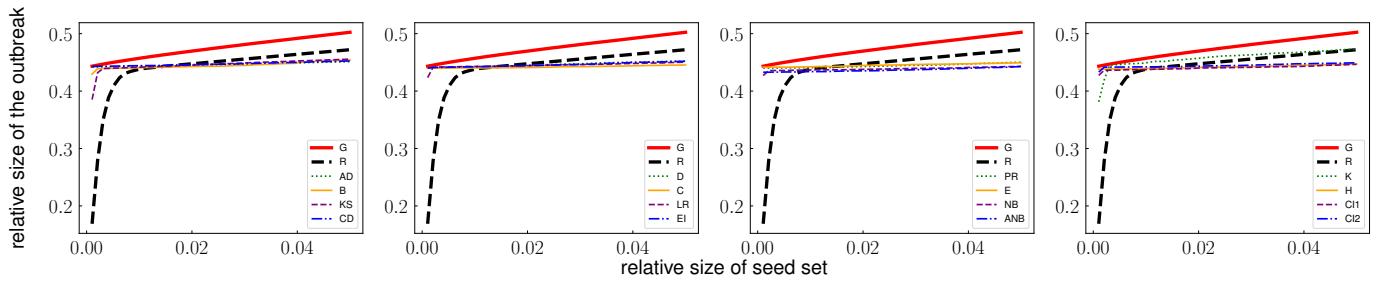

Figure 219: Reed -  $p=2.0p_c$

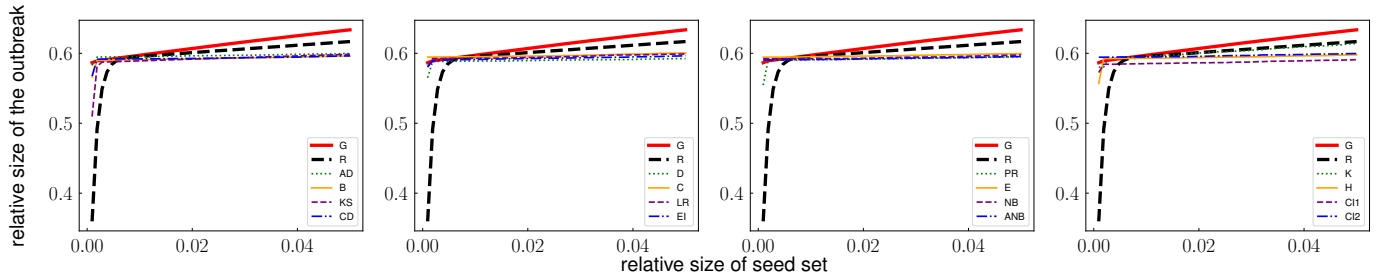

Figure 220: Mouse retina -  $p=2.0p_c$

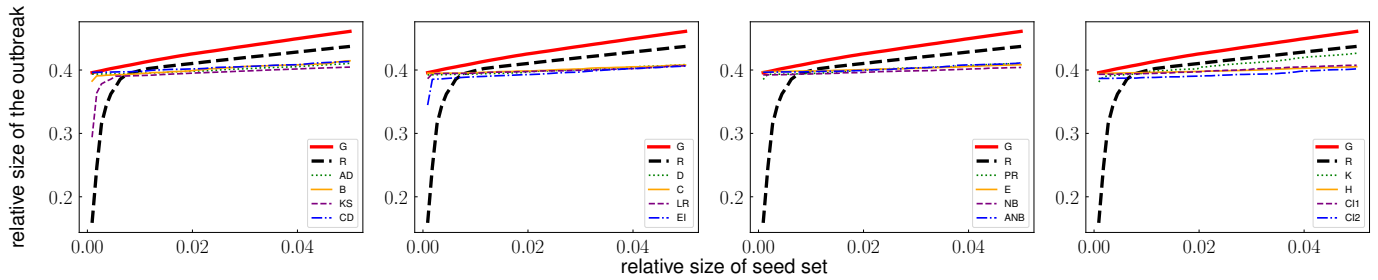

Figure 221: URV email -  $p=2.0p_c$

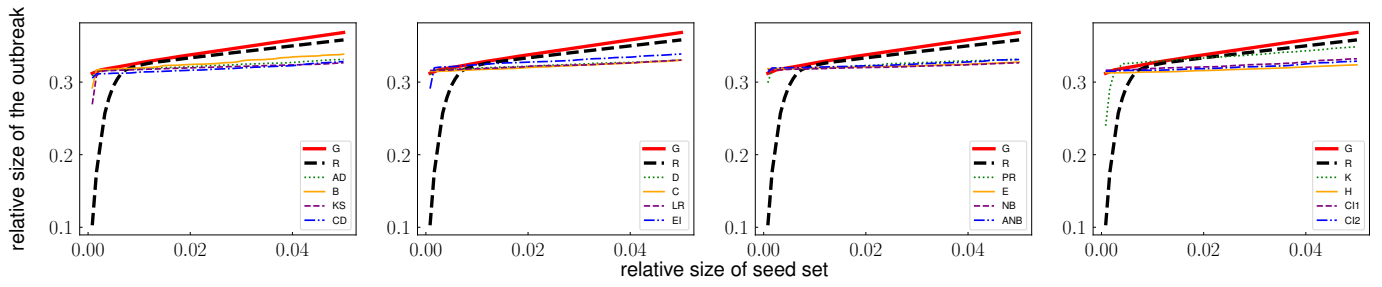

Figure 222: Political blogs -  $p=2.0p_c$

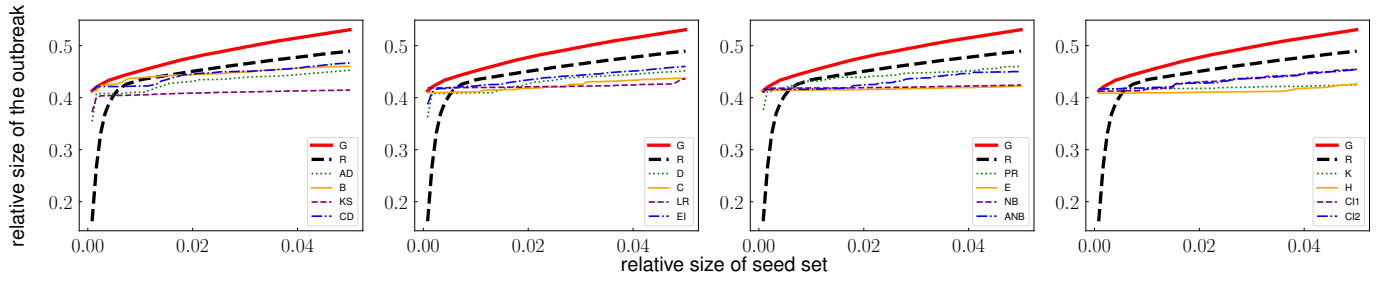

Figure 223: Air traffic -  $p=2.0p_c$

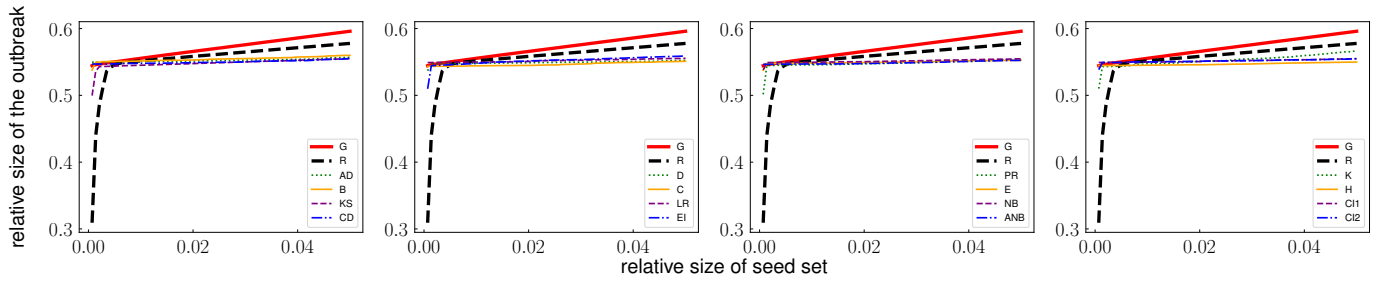

Figure 224: Haverford -  $p=2.0p_c$

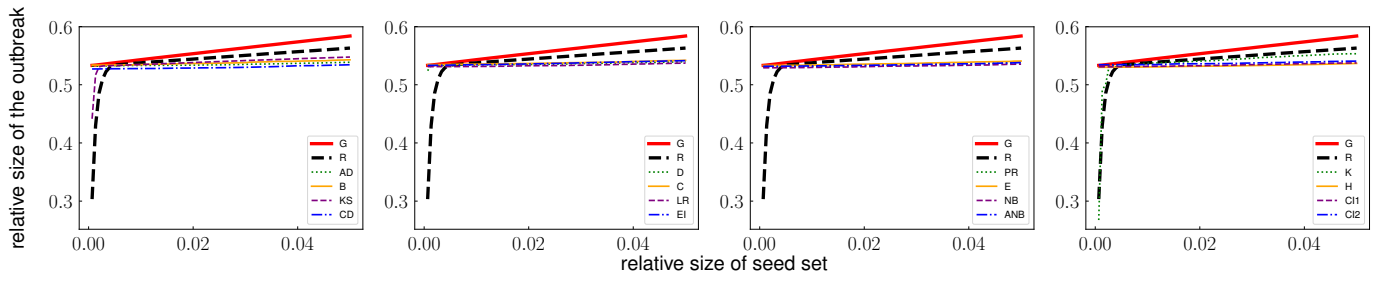

Figure 225: Simmons -  $p=2.0p_c$

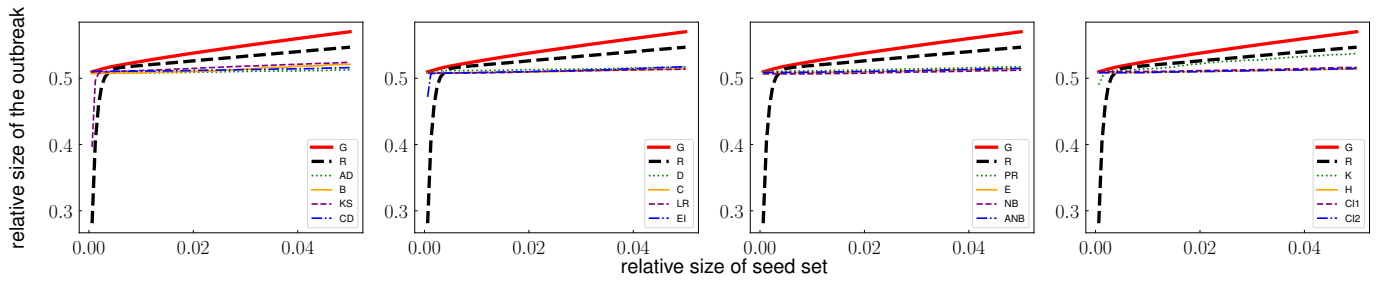

Figure 226: Swarthmore -  $p=2.0p_c$

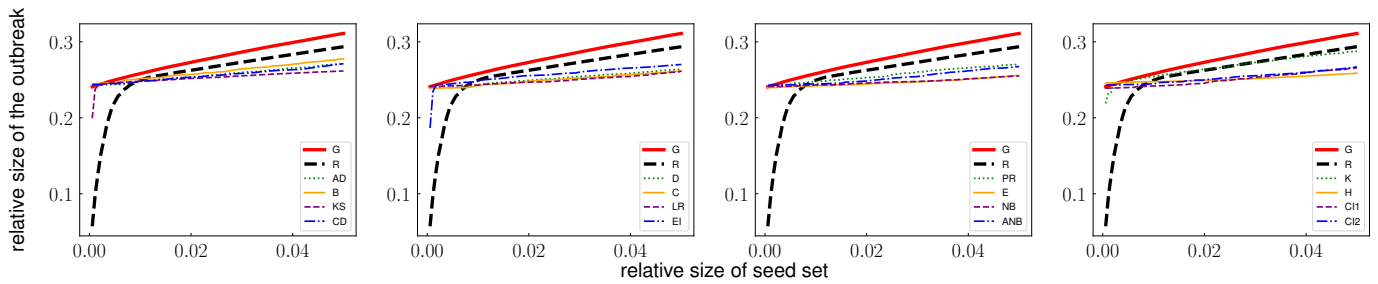

Figure 227: Petster, hamster -  $p=2.0p_c$



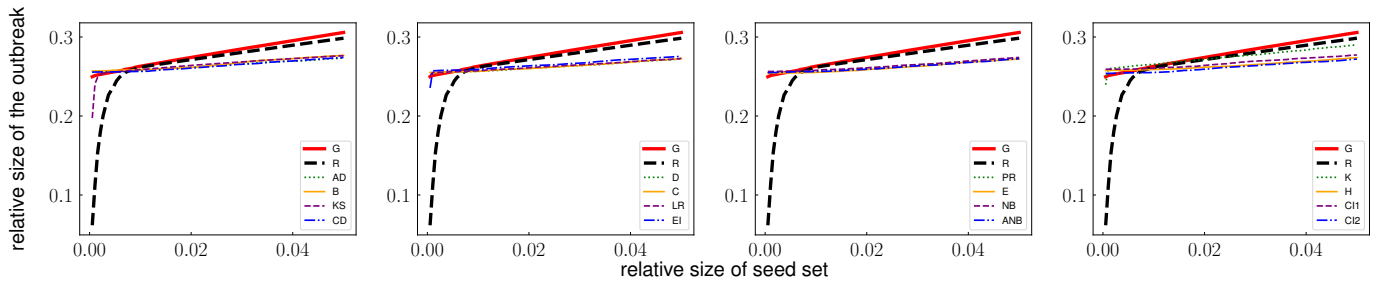

Figure 228: UC Irvine -  $p=2.0p_c$

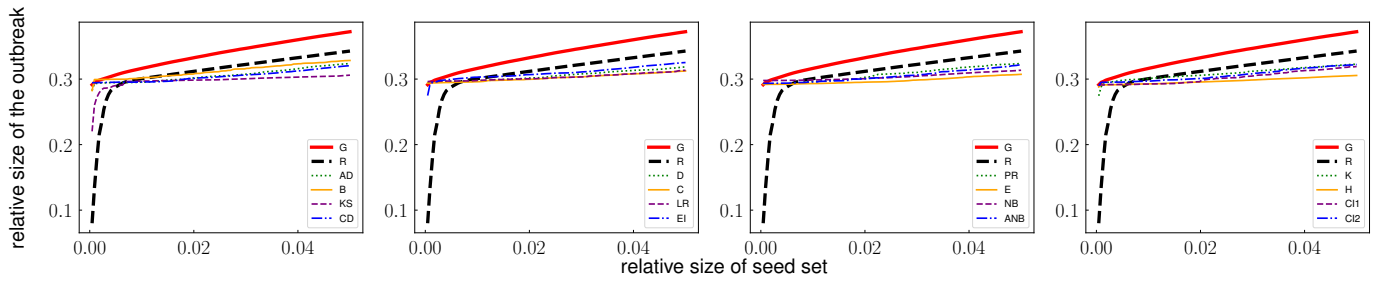

Figure 229: Yeast, protein -  $p=2.0p_c$

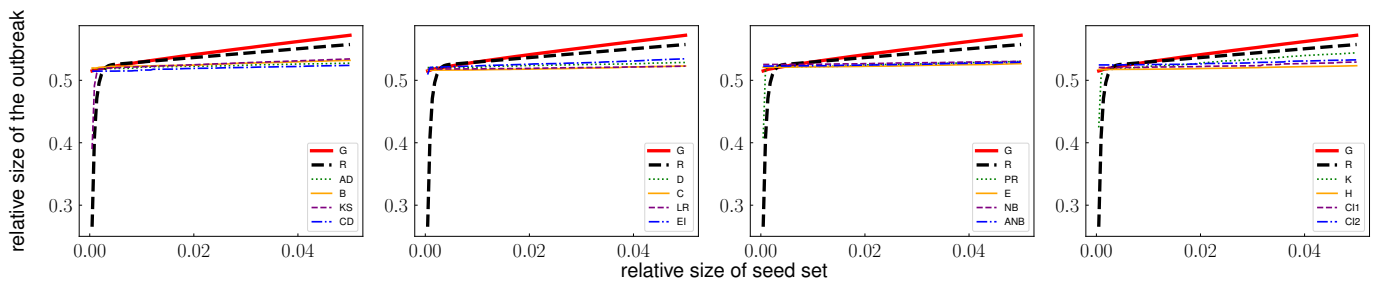

Figure 230: Amherst -  $p=2.0p_c$

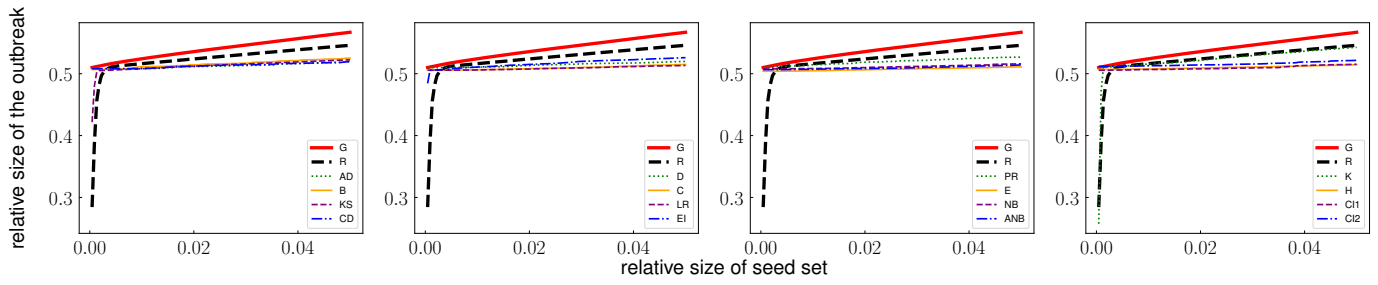

Figure 231: Bowdoin -  $p=2.0p_c$

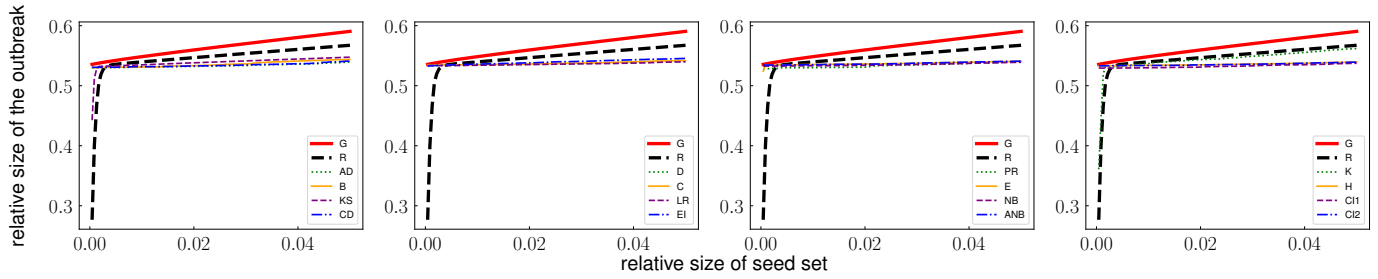

Figure 232: Hamilton -  $p=2.0p_c$

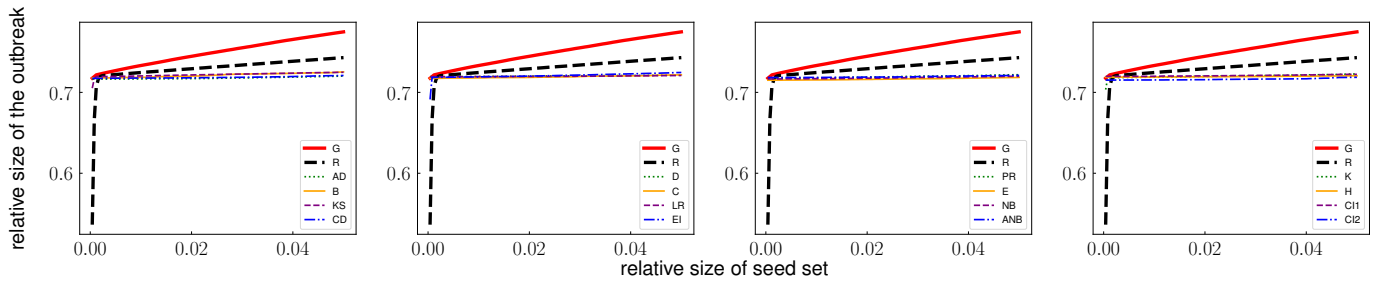

Figure 233: Adolescent health -  $p=2.0p_c$

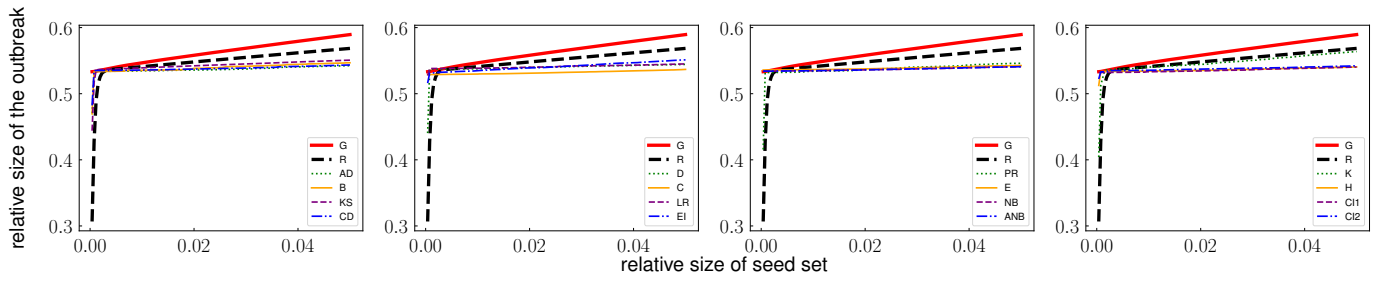

Figure 234: Trinity -  $p=2.0p_c$

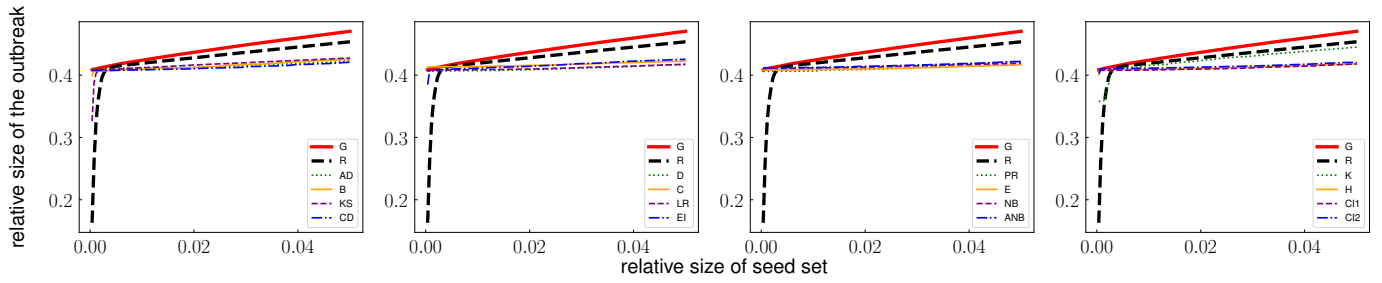

Figure 235: USFCA -  $p=2.0p_c$

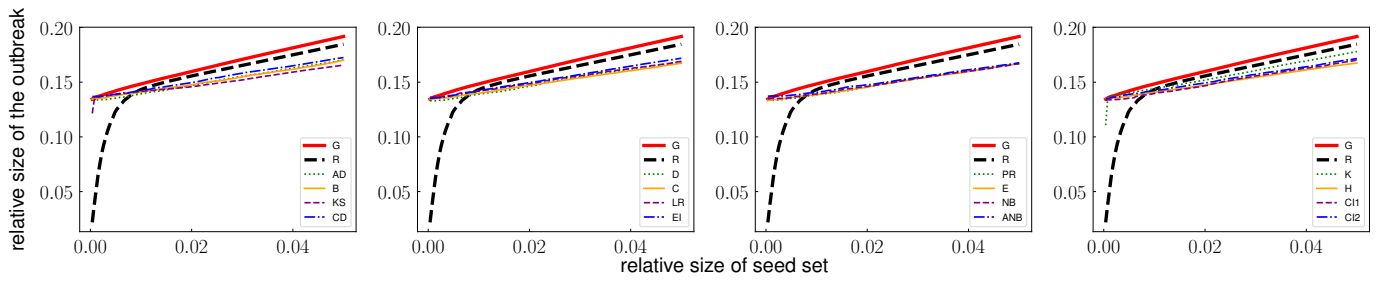

Figure 236: Japanese -  $p=2.0p_c$

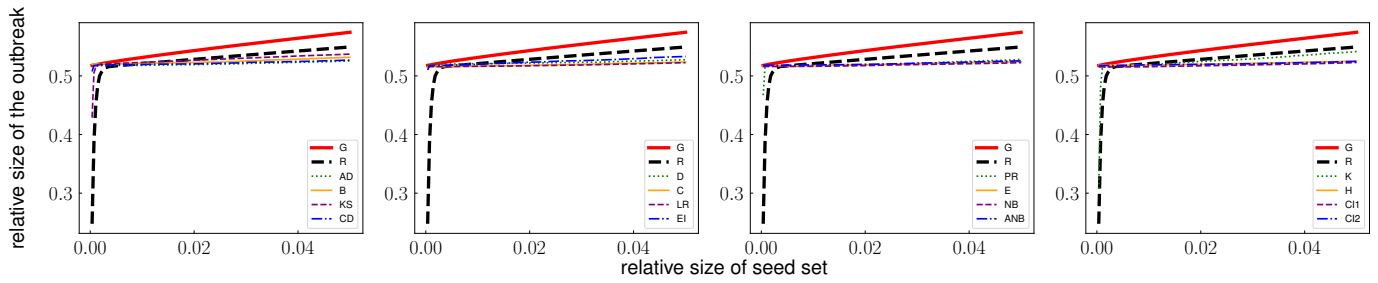

Figure 237: Williams -  $p=2.0p_c$

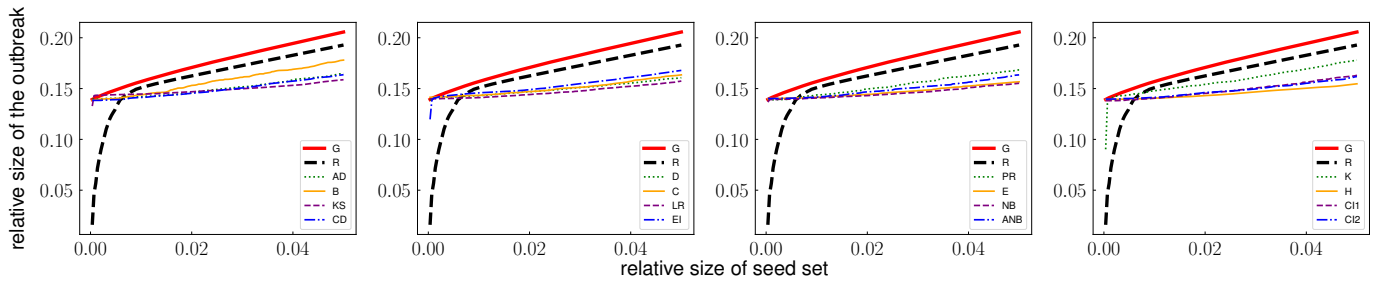

Figure 238: Open flights -  $p=2.0p_c$

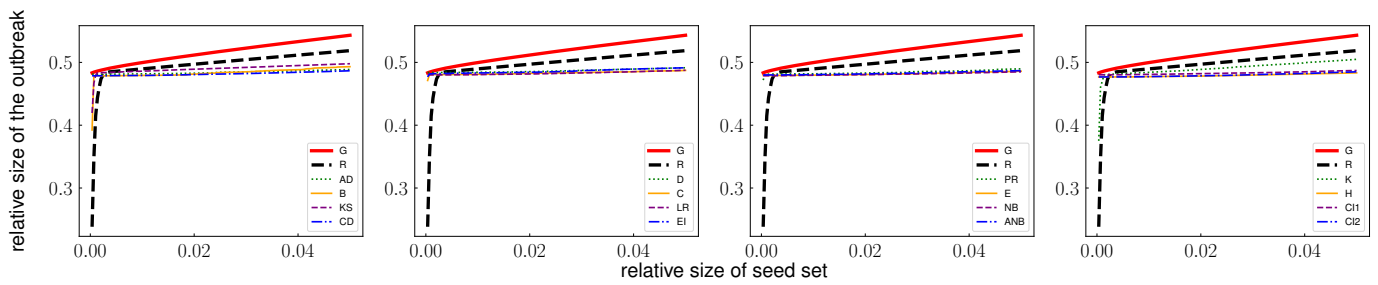

Figure 239: Oberlin -  $p=2.0p_c$

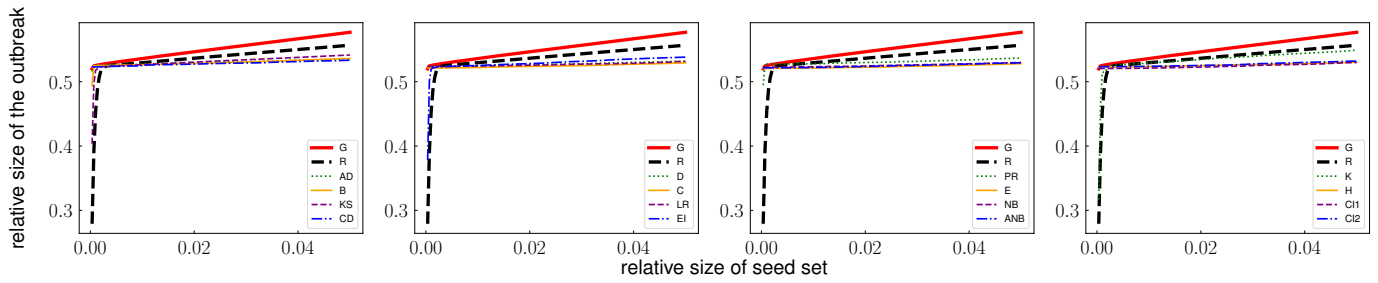

Figure 240: Smith -  $p=2.0p_c$

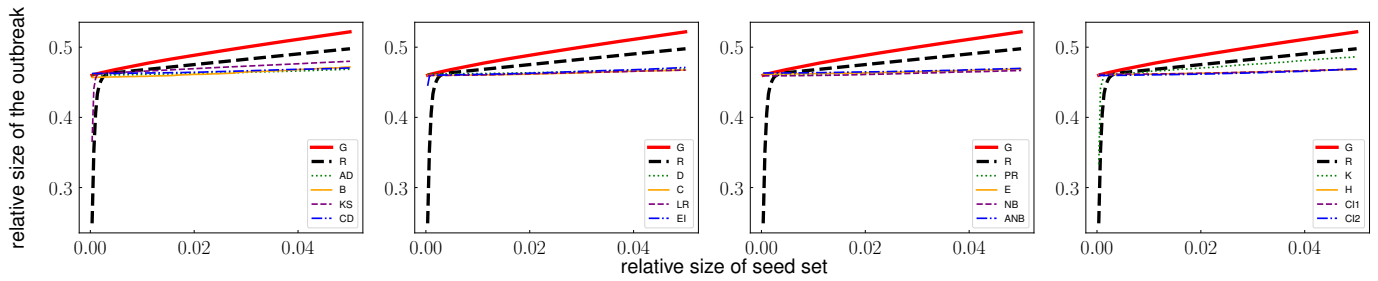

Figure 241: Wellesley -  $p=2.0p_c$

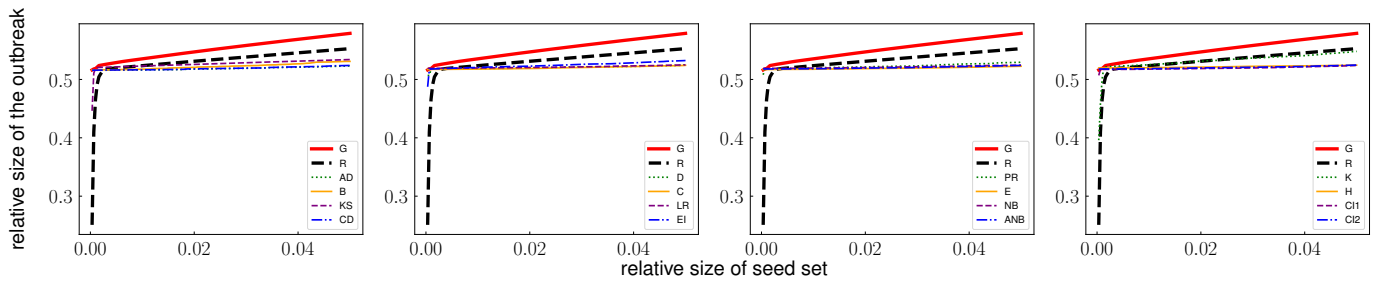

Figure 242: Vassar -  $p=2.0p_c$

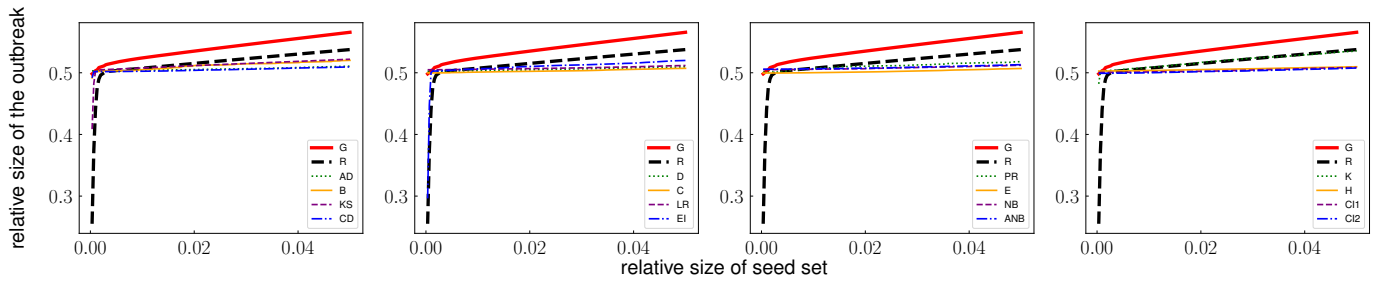

Figure 243: Middlebury -  $p=2.0p_c$

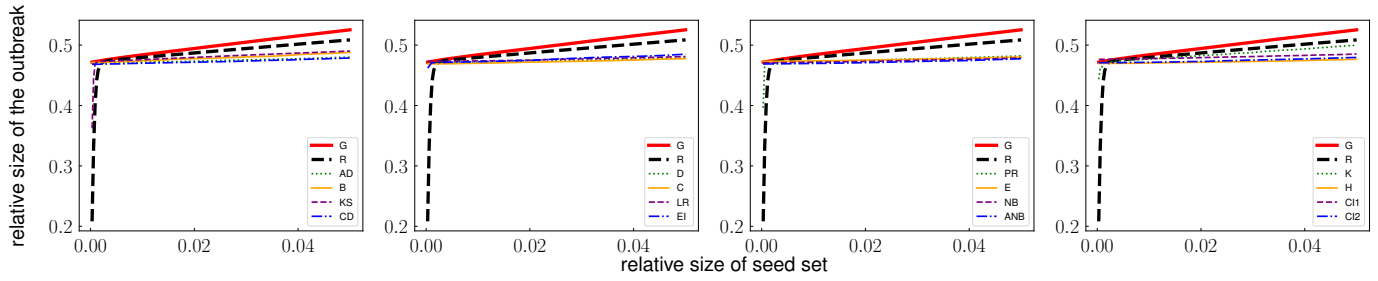

Figure 244: Pepperdine -  $p=2.0p_c$

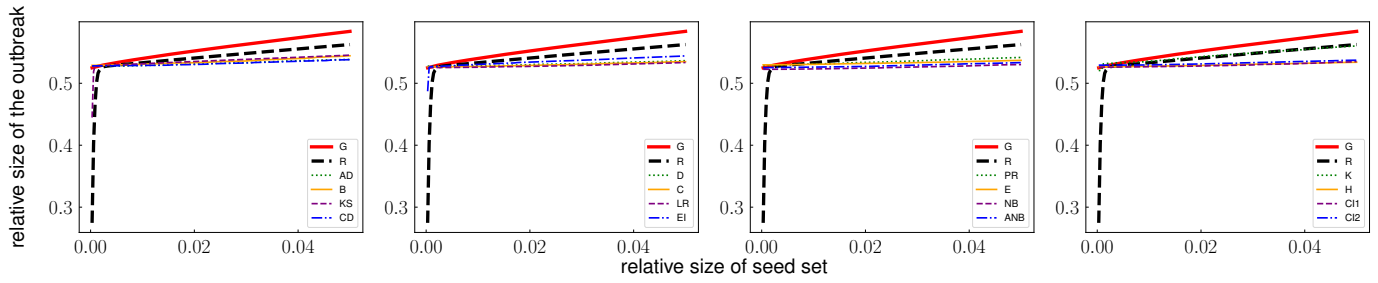

Figure 245: Colgate -  $p=2.0p_c$

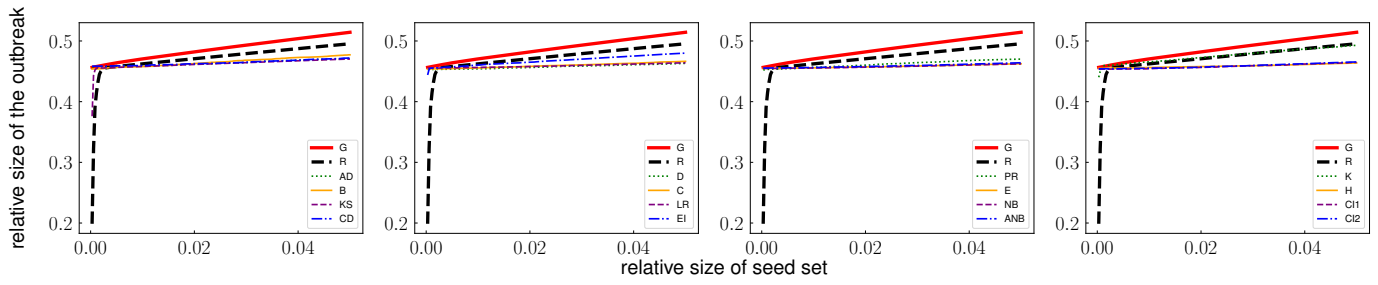

Figure 246: Santa -  $p=2.0p_c$

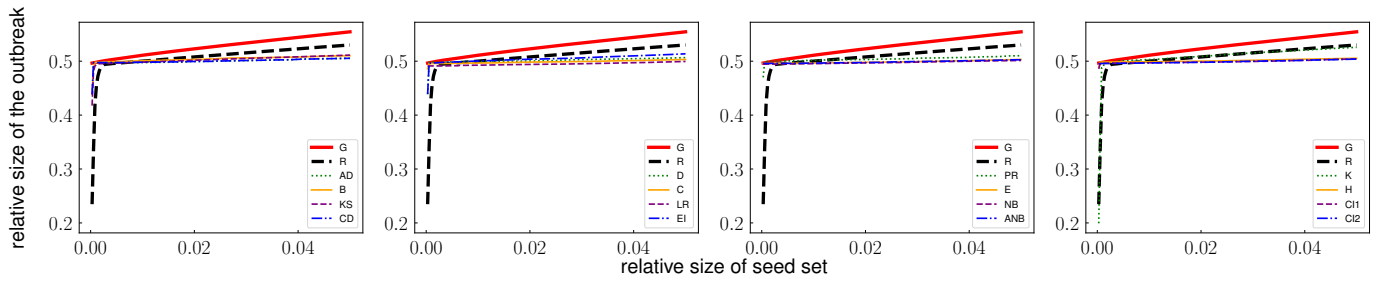

Figure 247: Wesleyan -  $p=2.0p_c$

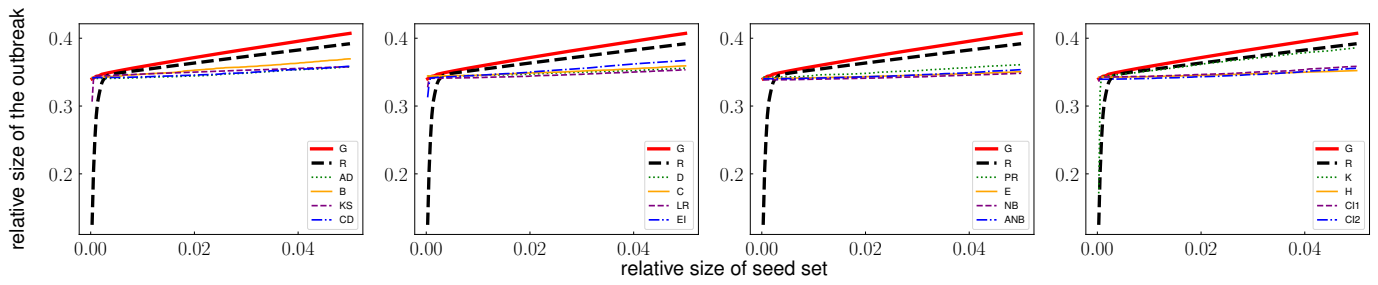

Figure 248: Mich -  $p=2.0p_c$

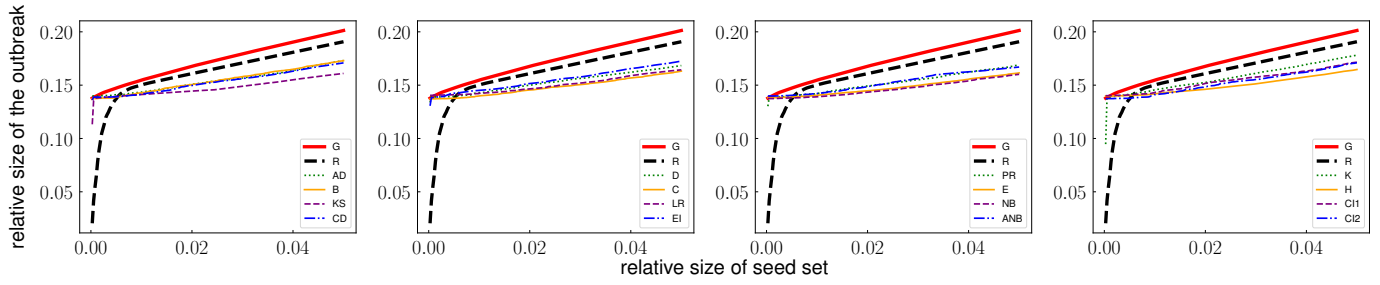

Figure 249: Bitcoin Alpha -  $p=2.0p_c$

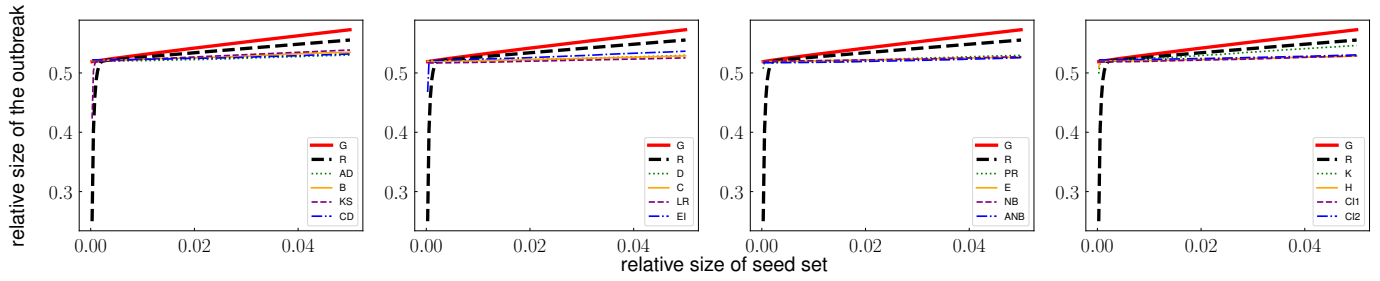

Figure 250: Bucknell -  $p=2.0p_c$

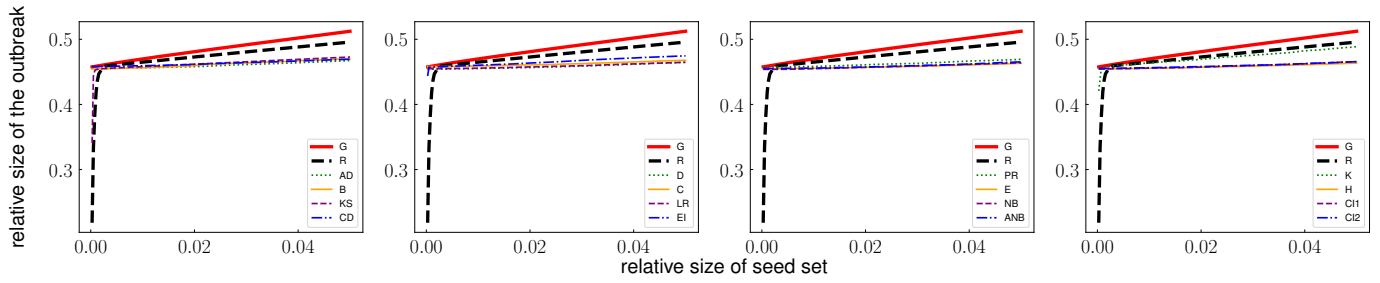

Figure 251: Brandeis -  $p=2.0p_c$



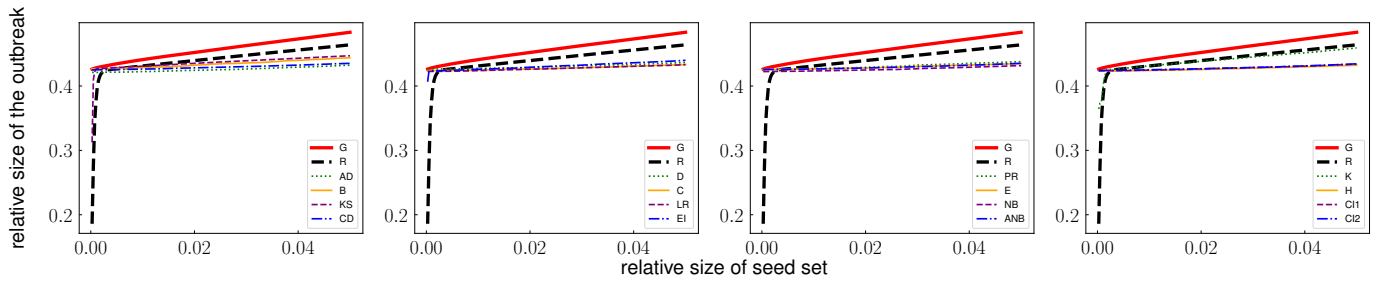

Figure 252: Howard -  $p=2.0p_c$

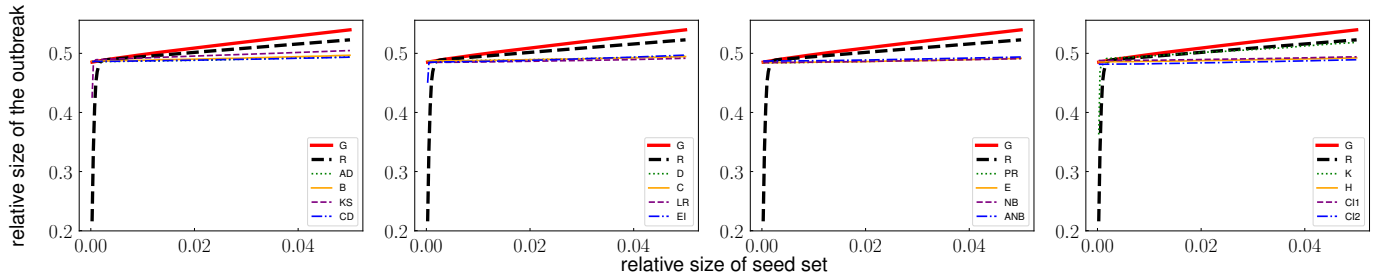

Figure 253: Rice -  $p=2.0p_c$

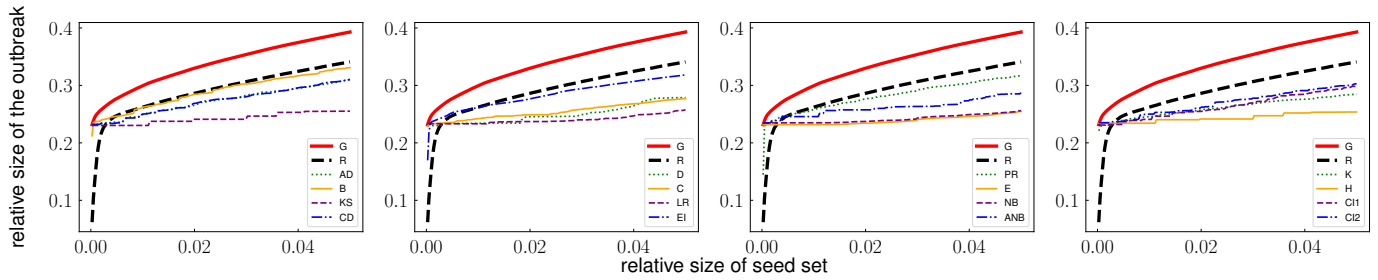

Figure 254: GR-QC, 1993-2003 -  $p=2.0p_c$

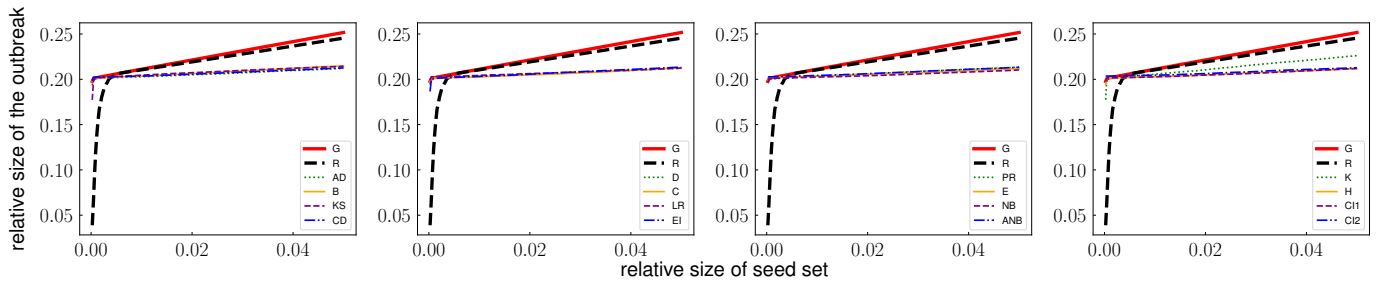

Figure 255: Tennis -  $p=2.0p_c$

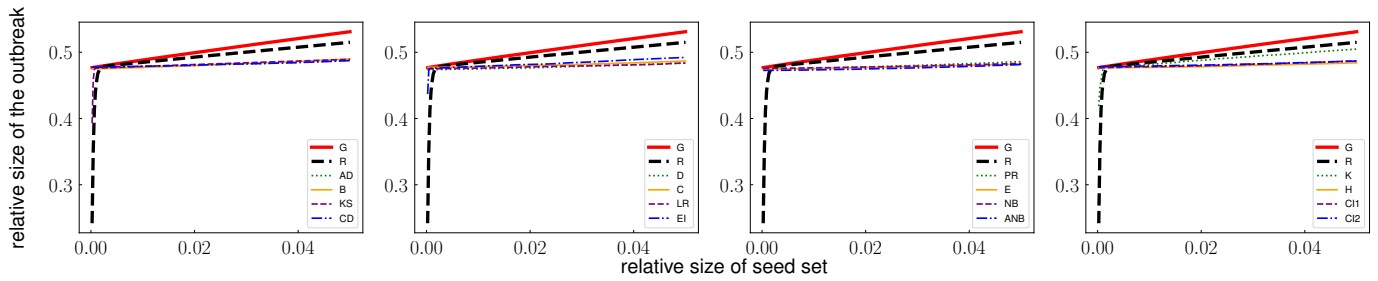

Figure 256: Rochester -  $p=2.0p_c$

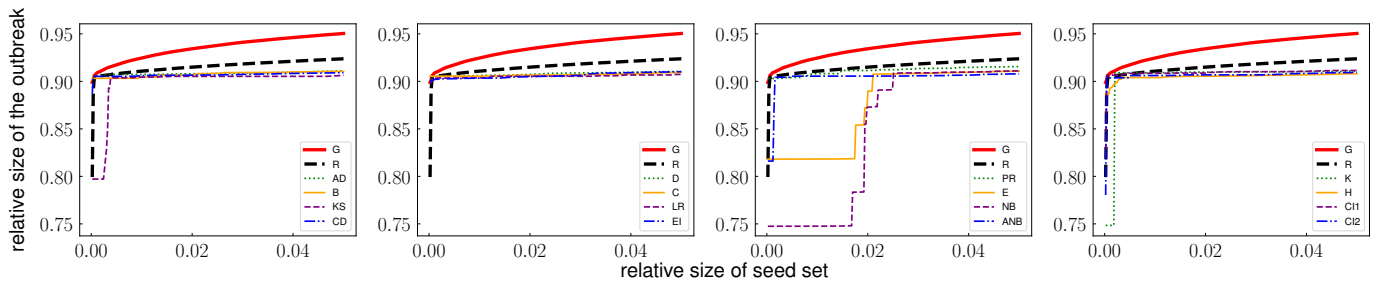

Figure 257: US Power grid -  $p=2.0p_c$

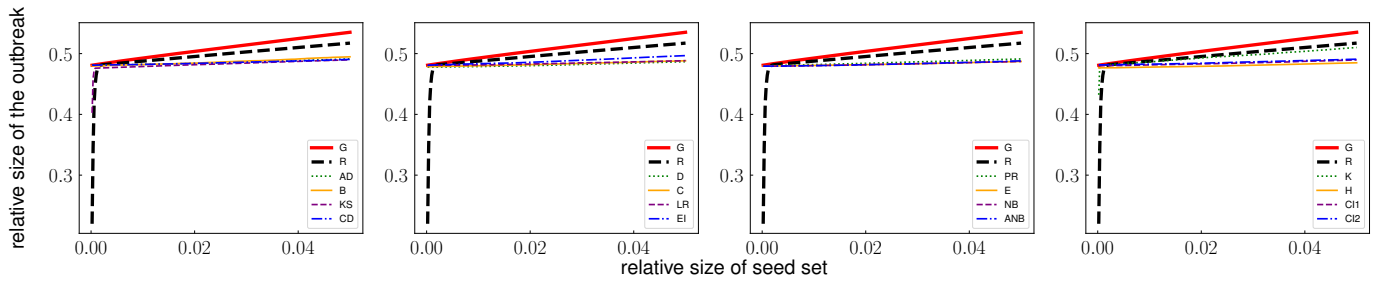

Figure 258: Lehigh -  $p=2.0p_c$

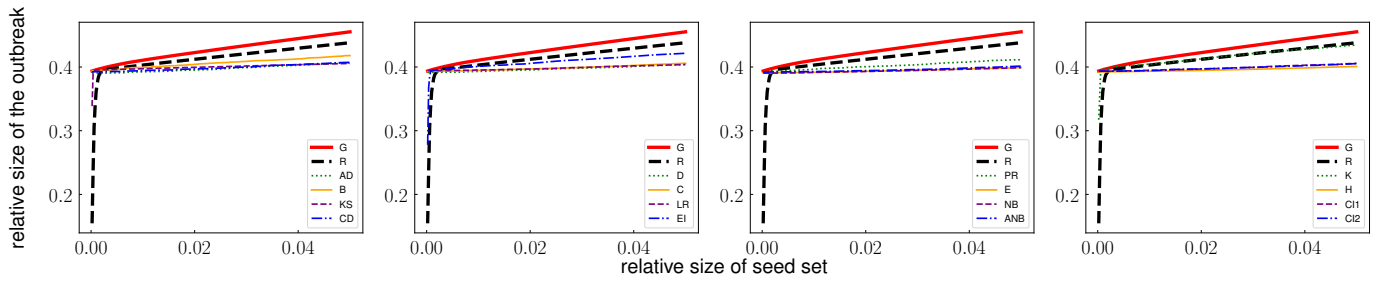

Figure 259: Johns Hopkins -  $p=2.0p_c$

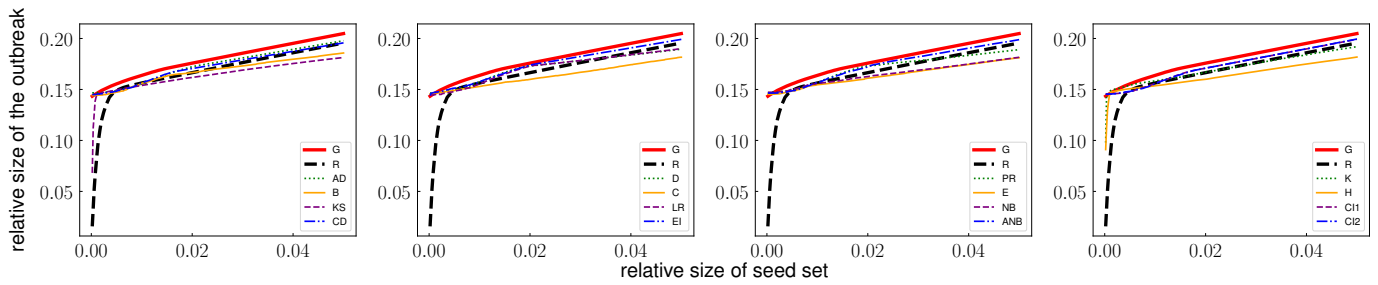

Figure 260: HT09 -  $p=2.0p_c$

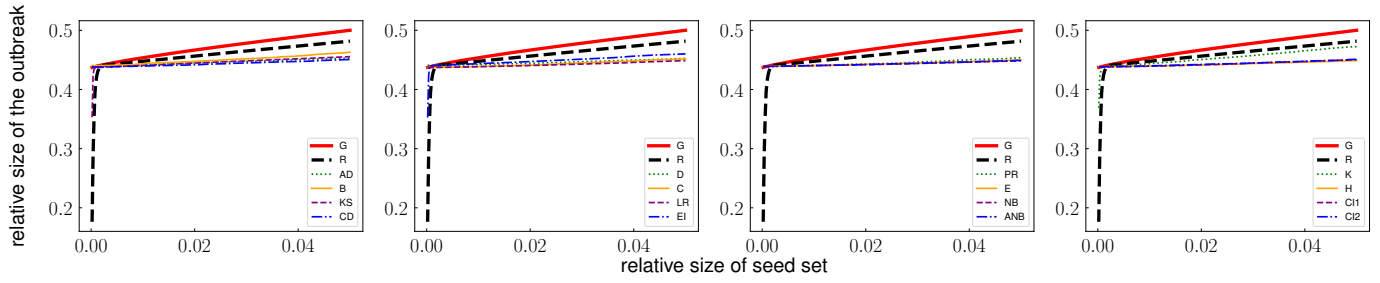

Figure 261: Wake -  $p=2.0p_c$

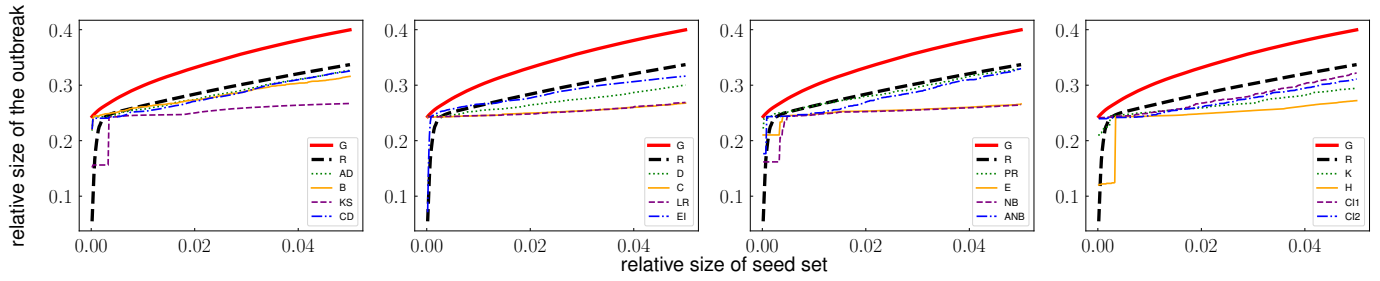

Figure 262: Hep-Th, 1995-1999 -  $p=2.0p_c$

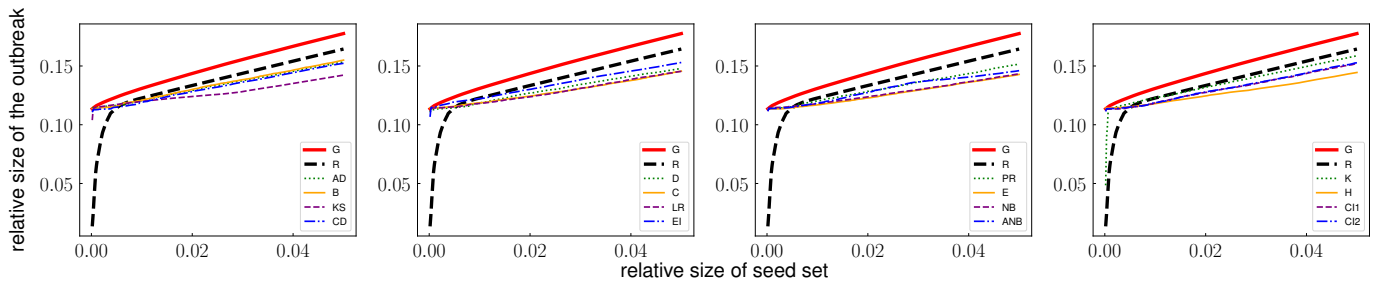

Figure 263: Bitcoin OTC -  $p=2.0p_c$

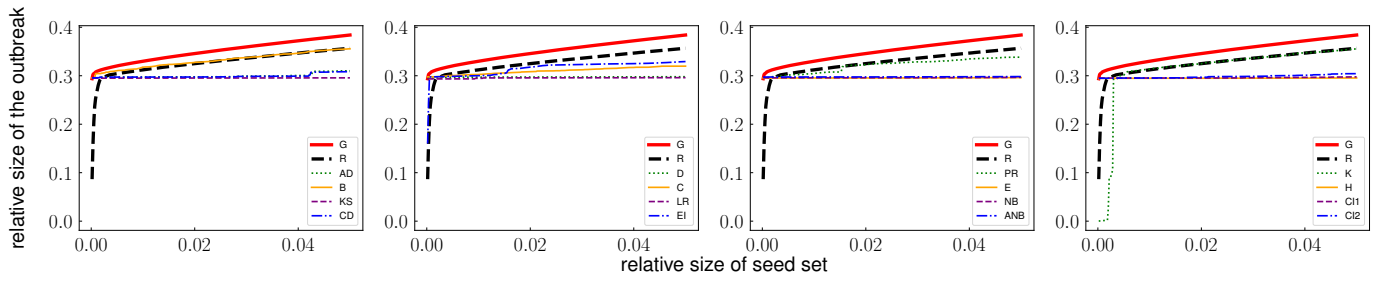

Figure 264: Reactome -  $p=2.0p_c$

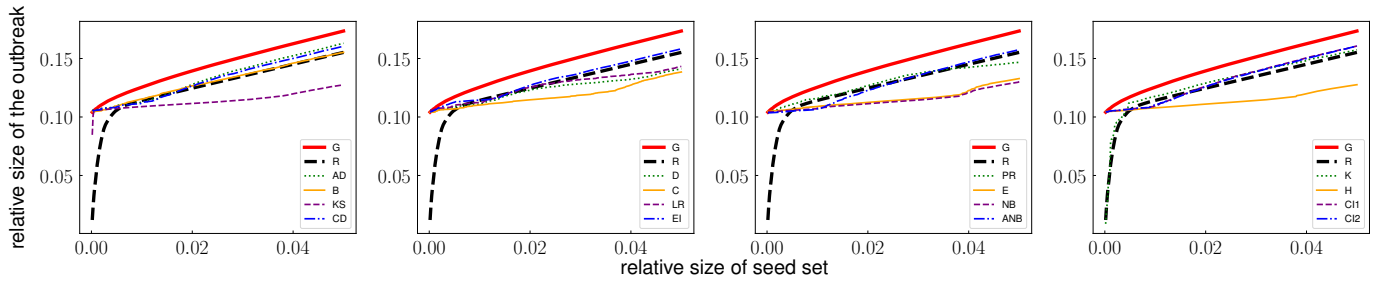

Figure 265: Jung -  $p=2.0p_c$

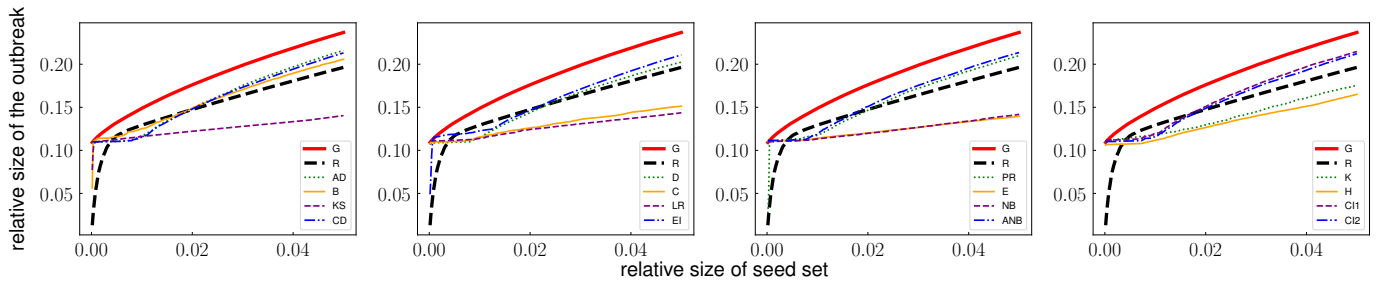

Figure 266: Gnutella, Aug. 8, 2002 -  $p=2.0p_c$

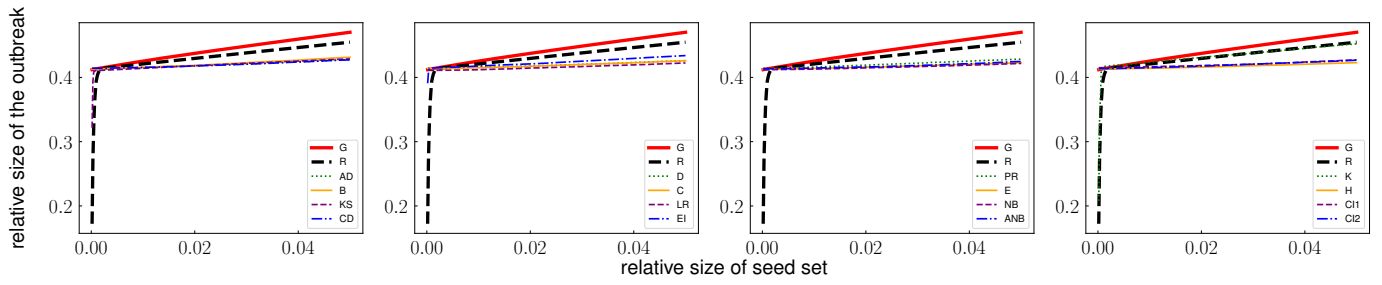

Figure 267: American -  $p=2.0p_c$

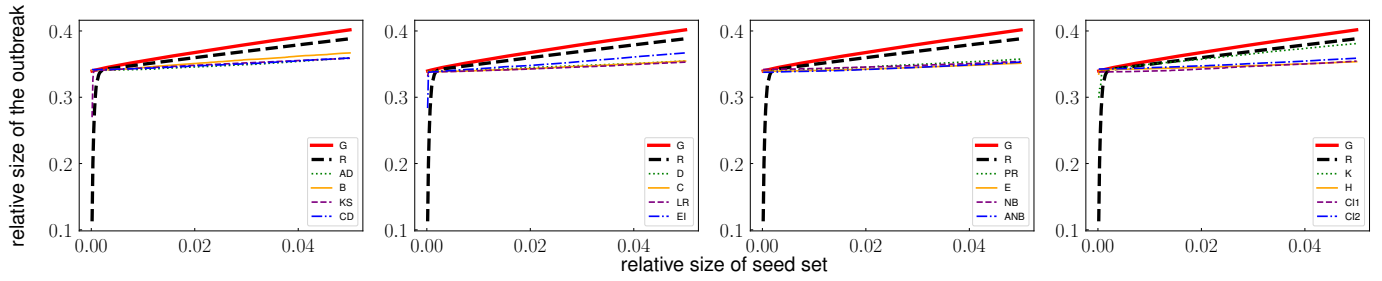

Figure 268: MIT -  $p=2.0p_c$

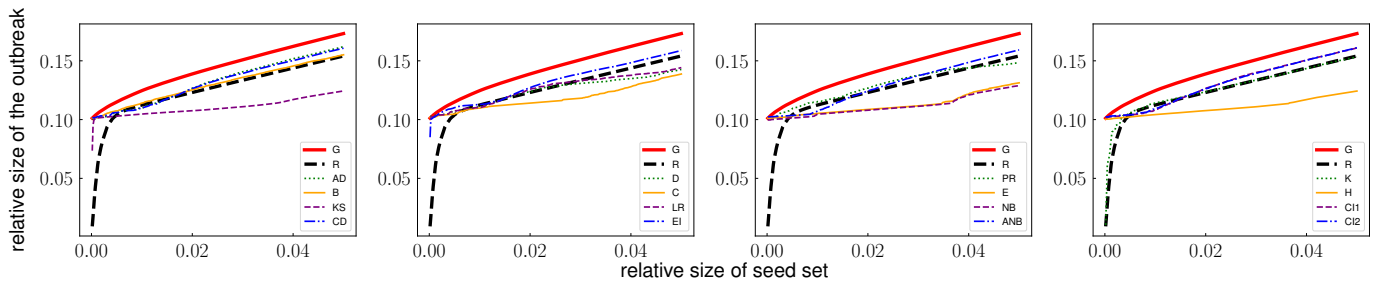

Figure 269: JDK -  $p=2.0p_c$

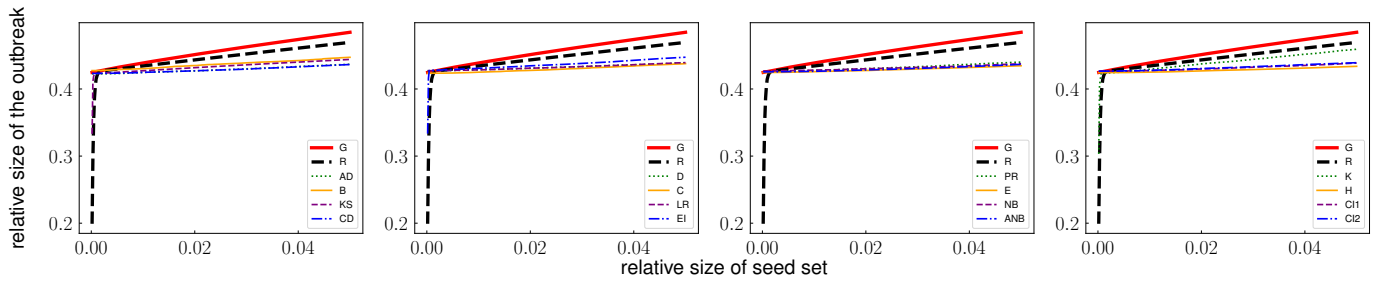

Figure 270: William -  $p=2.0p_c$

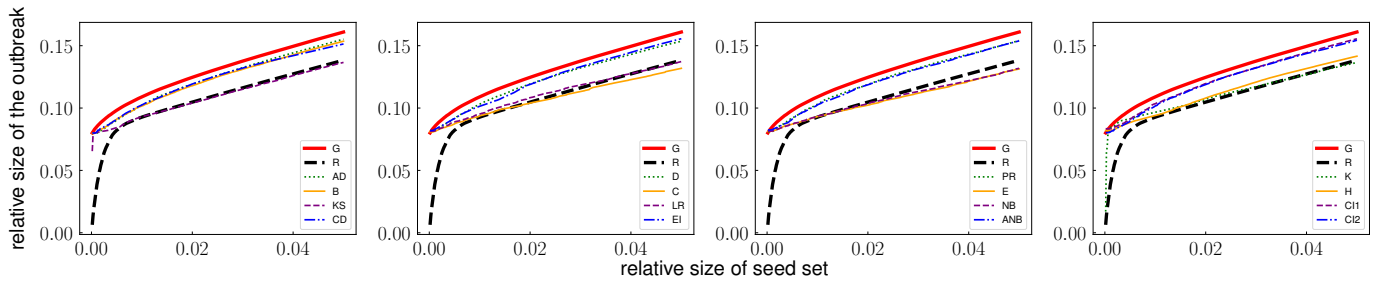

Figure 271: AS Oregon -  $p=2.0p_c$

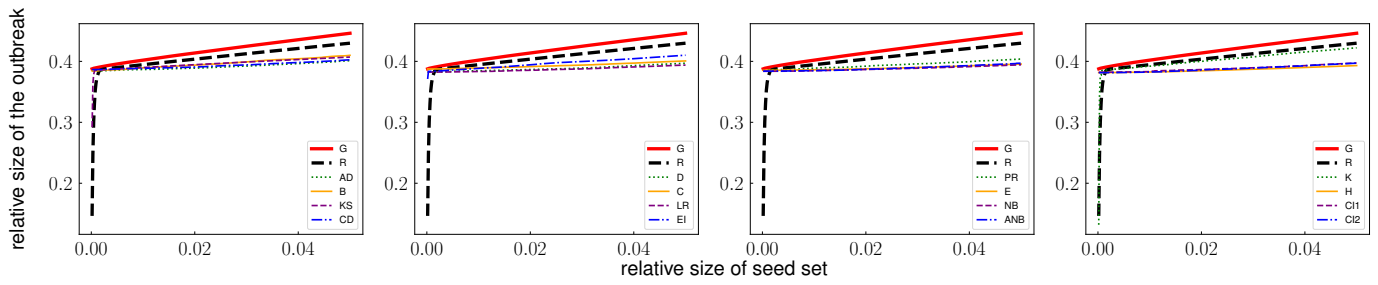

Figure 272: UChicago -  $p=2.0p_c$

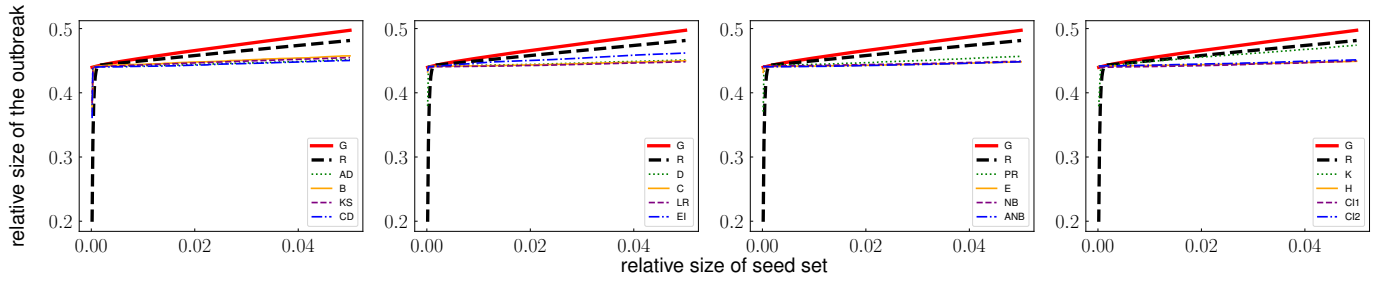

Figure 273: Princeton -  $p=2.0p_c$

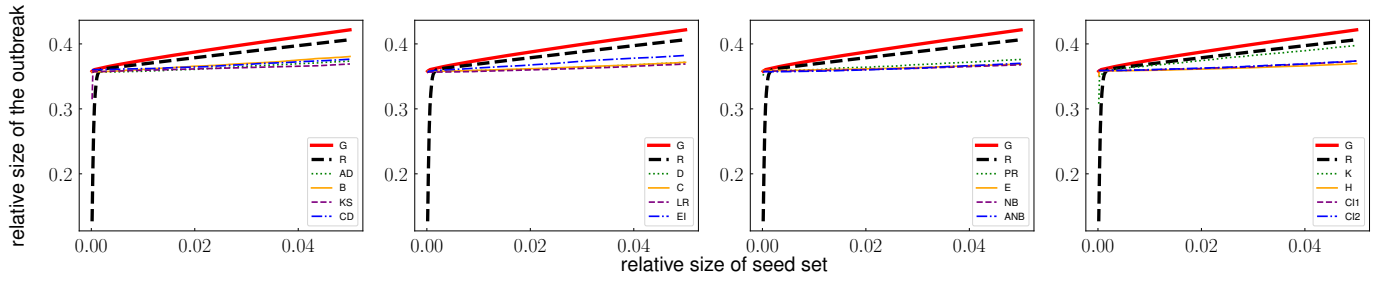

Figure 274: Carnegie -  $p=2.0p_c$

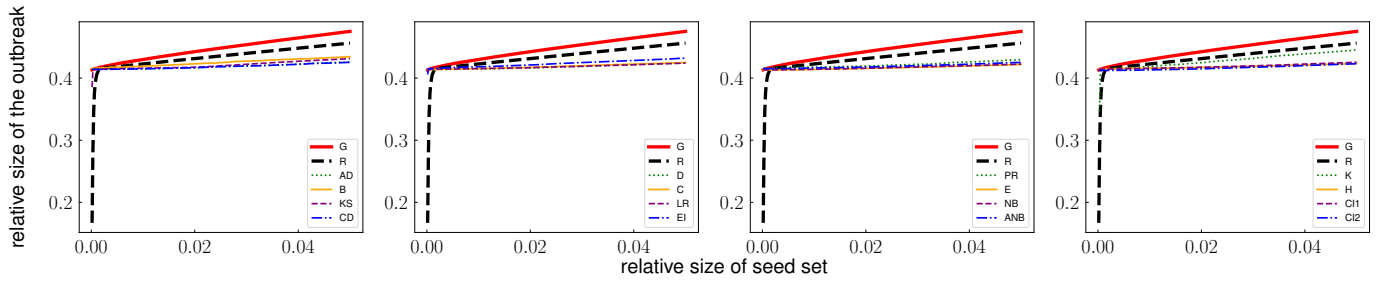

Figure 275: Tufts -  $p=2.0p_c$



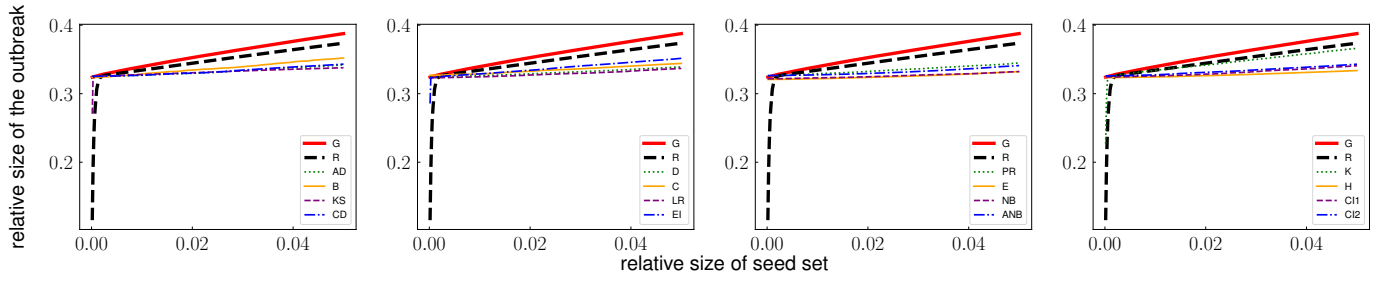

Figure 276: UC -  $p=2.0p_c$

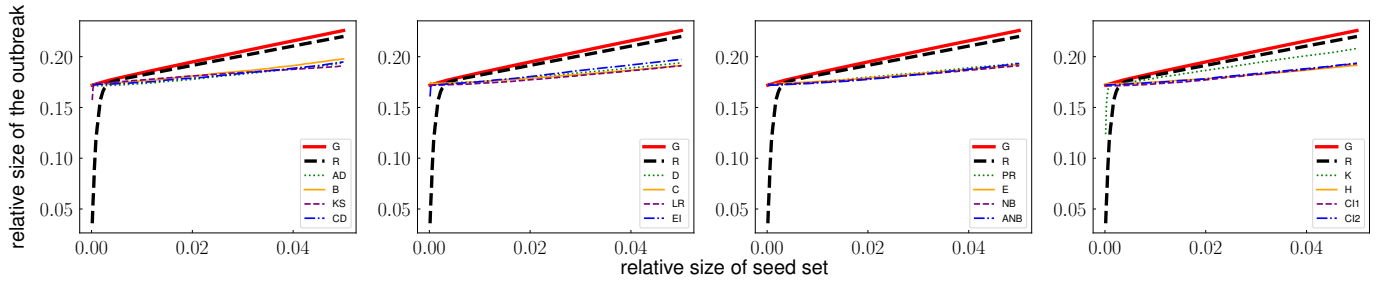

Figure 277: Wikipedia elections -  $p=2.0p_c$

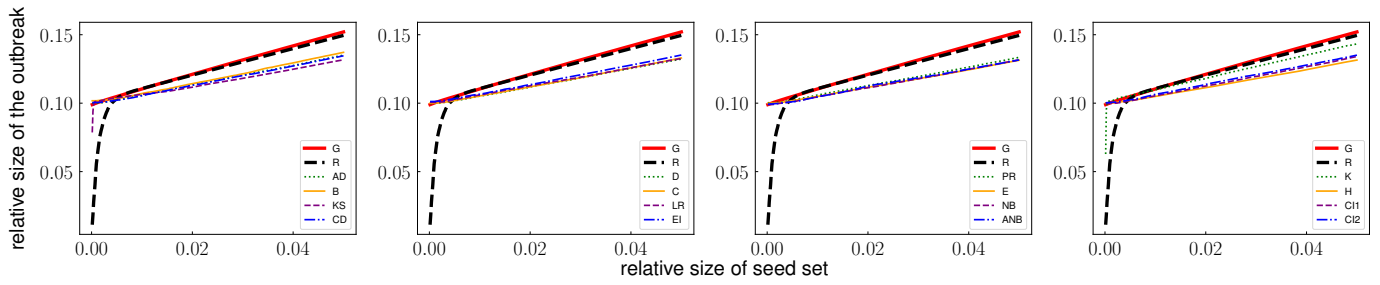

Figure 278: English -  $p=2.0p_c$

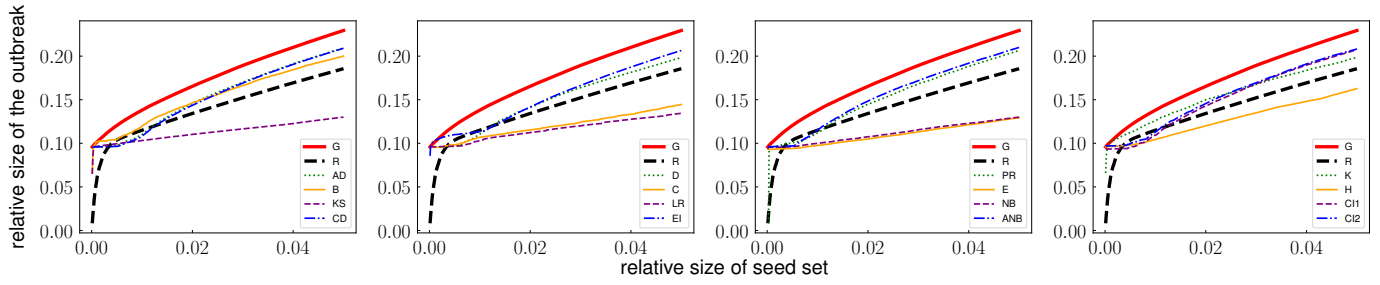

Figure 279: Gnutella, Aug. 9, 2002 -  $p=2.0p_c$

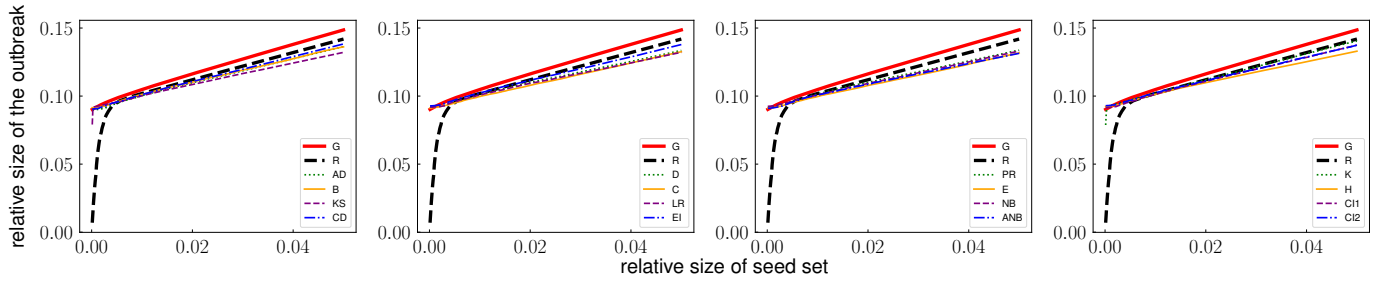

Figure 280: French -  $p=2.0p_c$

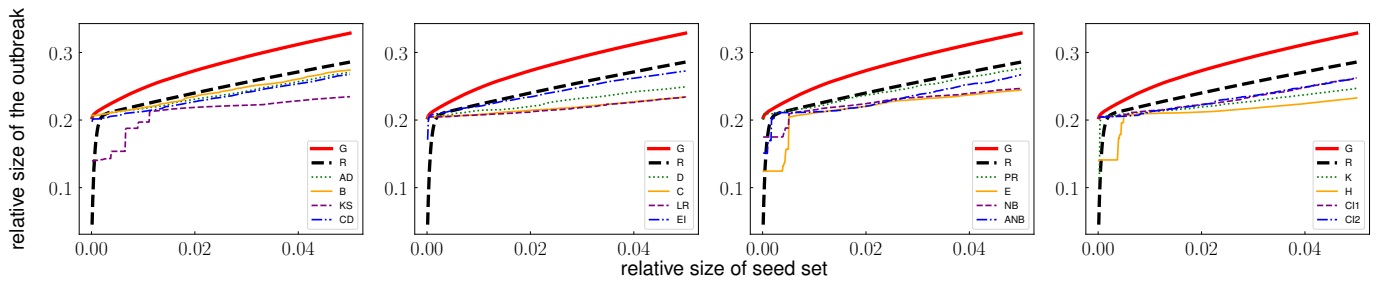

Figure 281: Hep-Th, 1993-2003 -  $p=2.0p_c$

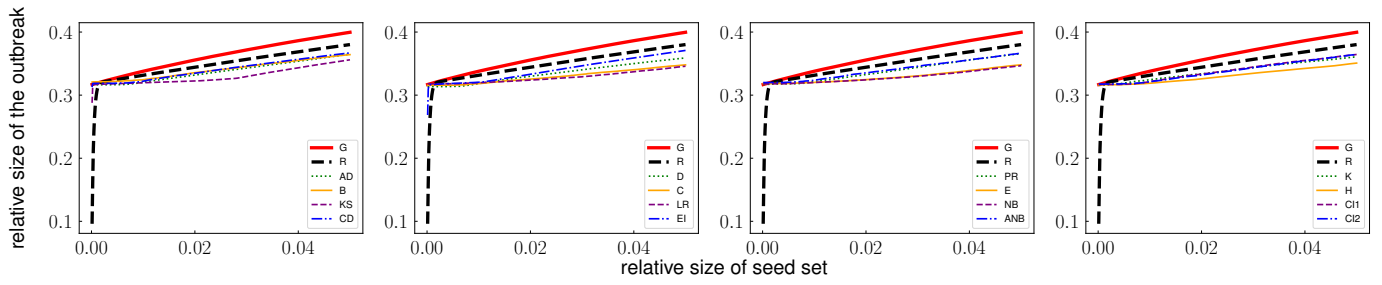

Figure 282: Gnutella, Aug. 6, 2002 -  $p=2.0p_c$

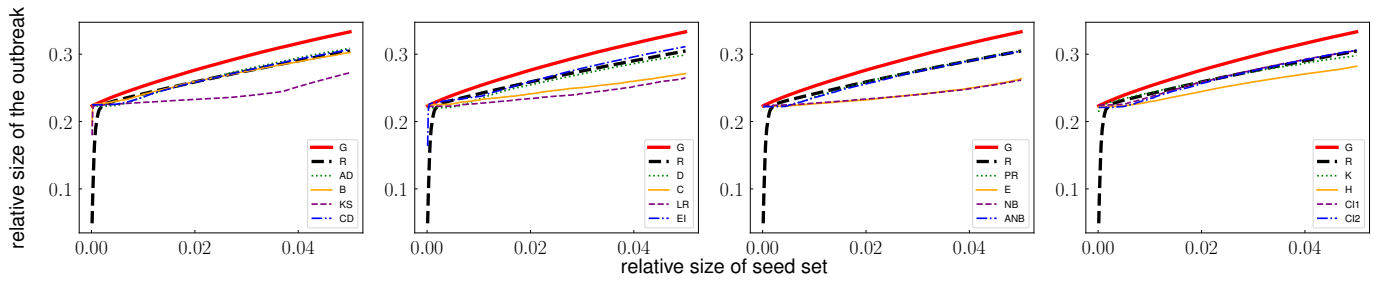

Figure 283: Gnutella, Aug. 5, 2002 -  $p=2.0p_c$

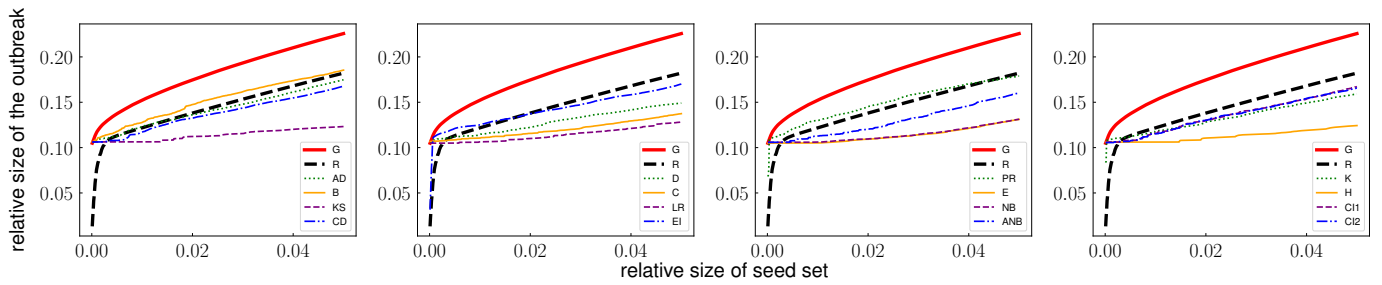

Figure 284: PGP -  $p=2.0p_c$

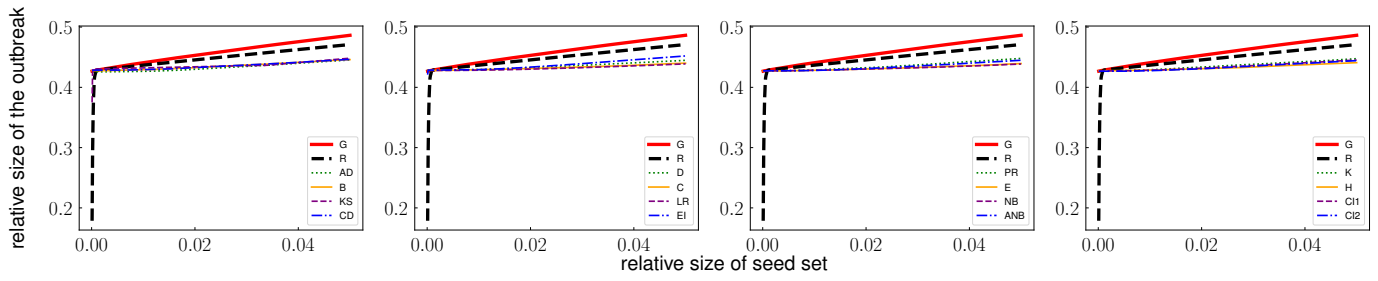

Figure 285: Gnutella, Aug. 4, 2002 -  $p=2.0p_c$

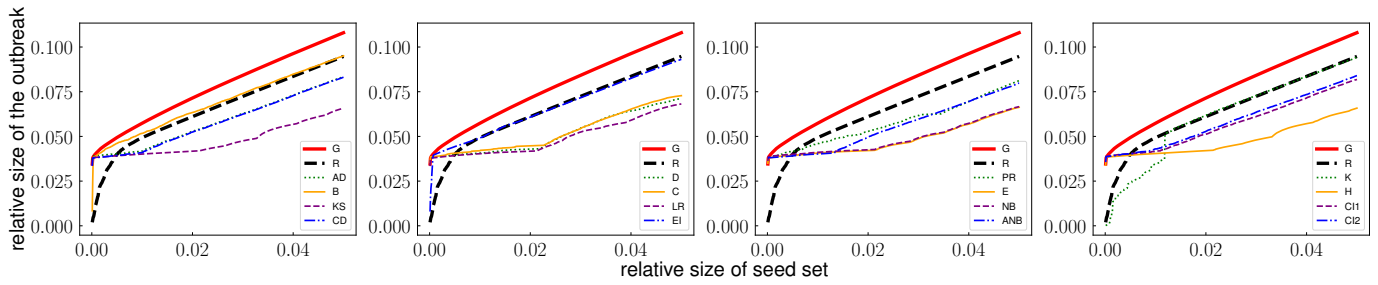

Figure 286: Hep-Ph, 1993-2003 -  $p=2.0p_c$

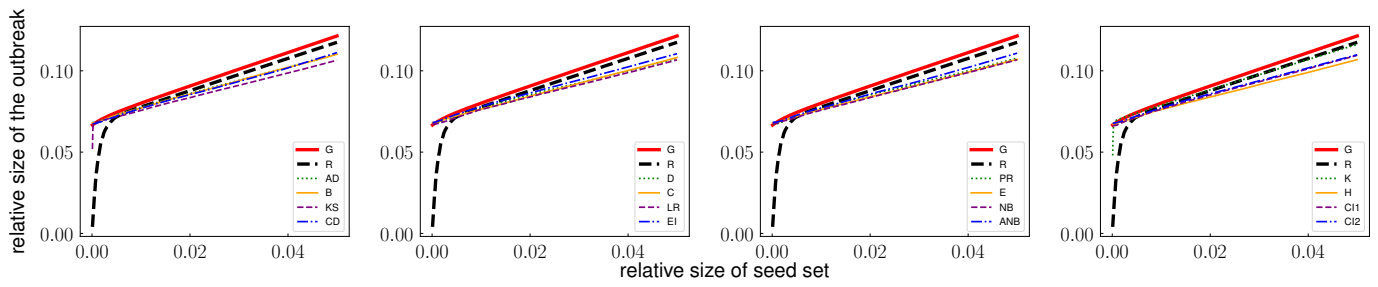

Figure 287: Spanish 1 -  $p=2.0p_c$

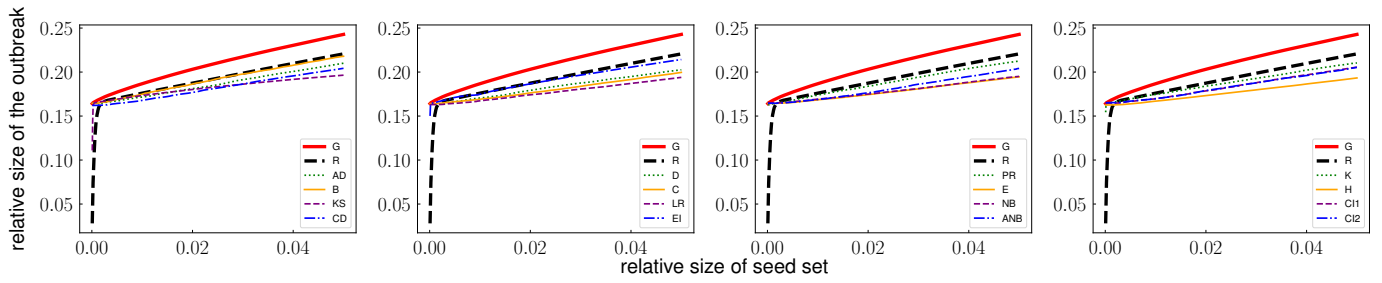

Figure 288: DBLP, citations -  $p=2.0p_c$

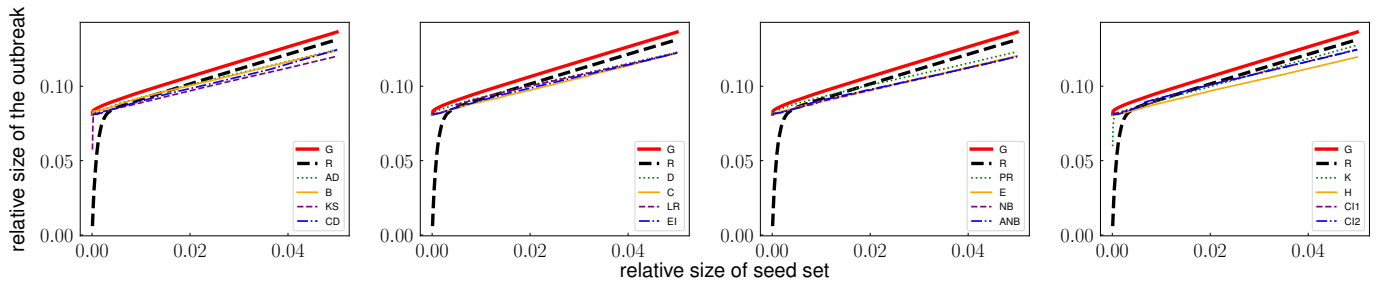

Figure 289: Spanish 2 -  $p=2.0p_c$

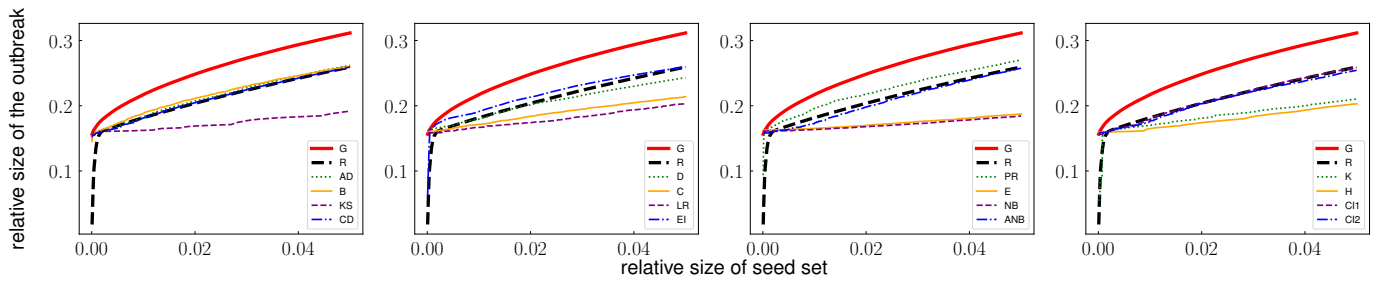

Figure 290: Cond-Mat, 1995-1999 -  $p=2.0p_c$

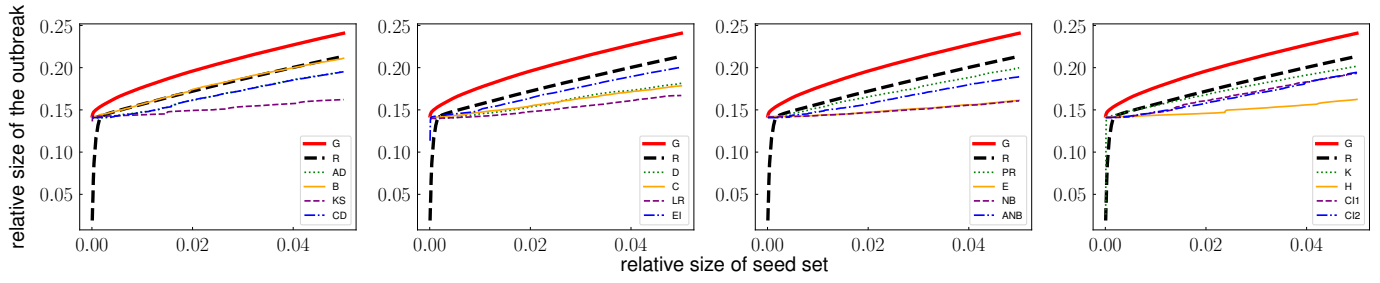

Figure 291: Astrophysics -  $p=2.0p_c$

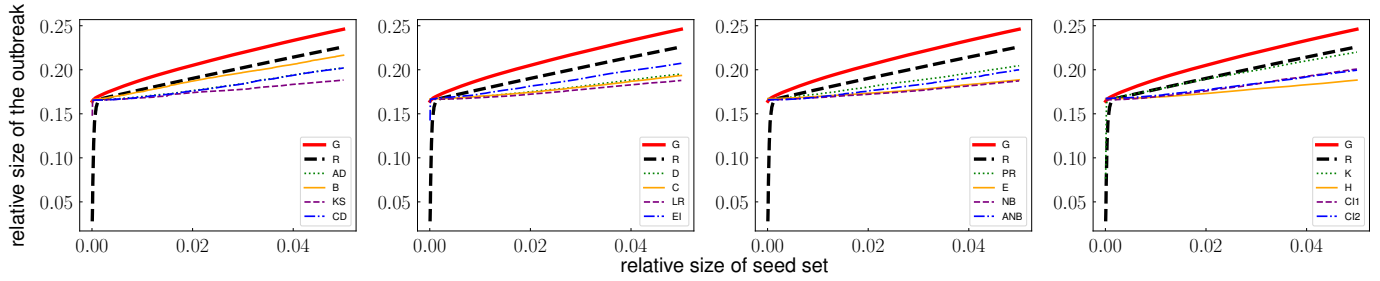

Figure 292: AstroPhys, 1993-2003 -  $p=2.0p_c$

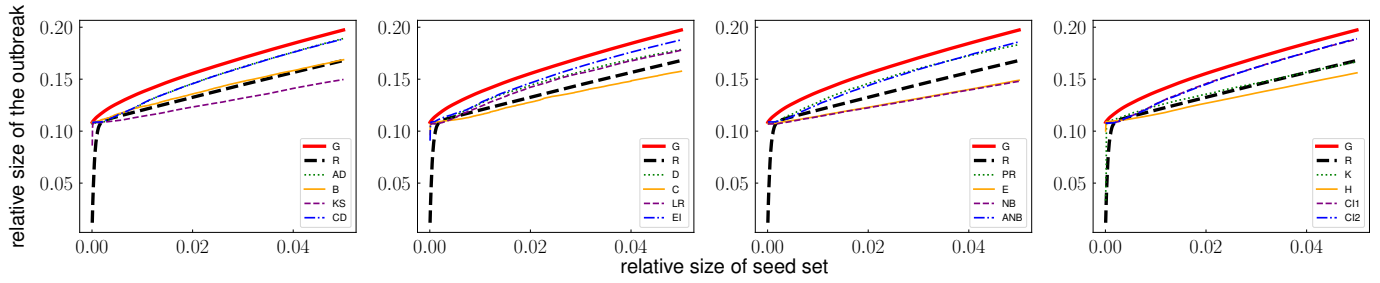

Figure 293: Marvel -  $p=2.0p_c$

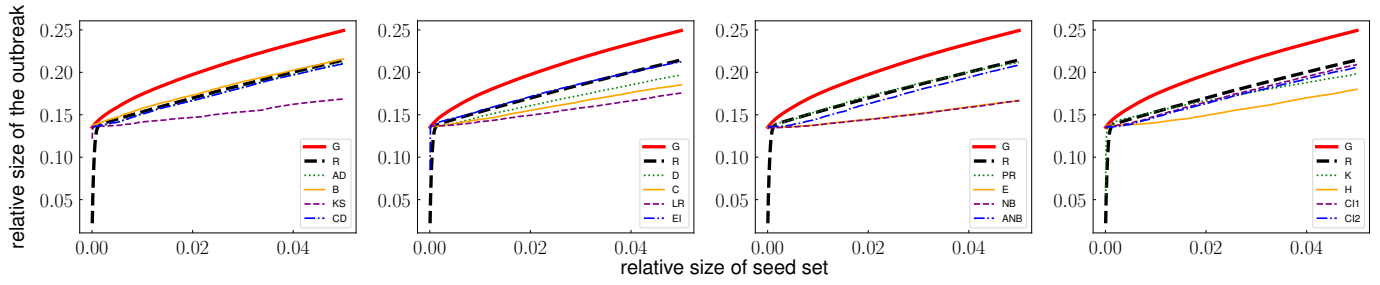

Figure 294: Cond-Mat, 1993-2003 -  $p=2.0p_c$

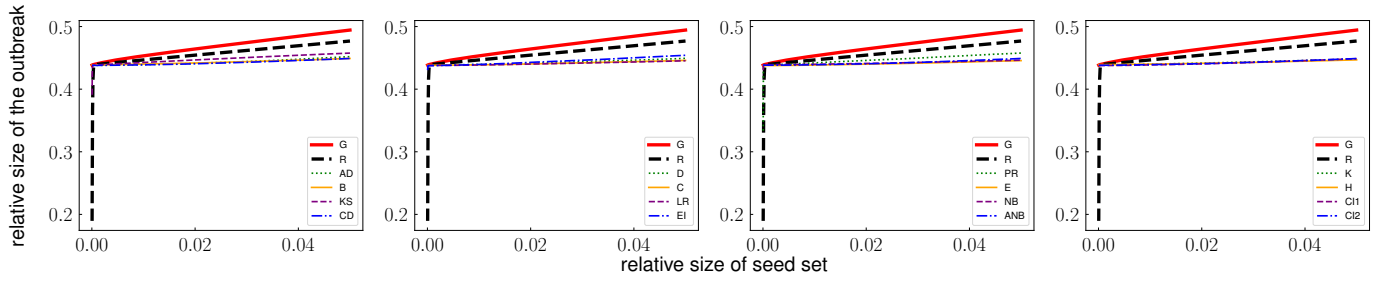

Figure 295: Gnutella, Aug. 25, 2002 -  $p=2.0p_c$

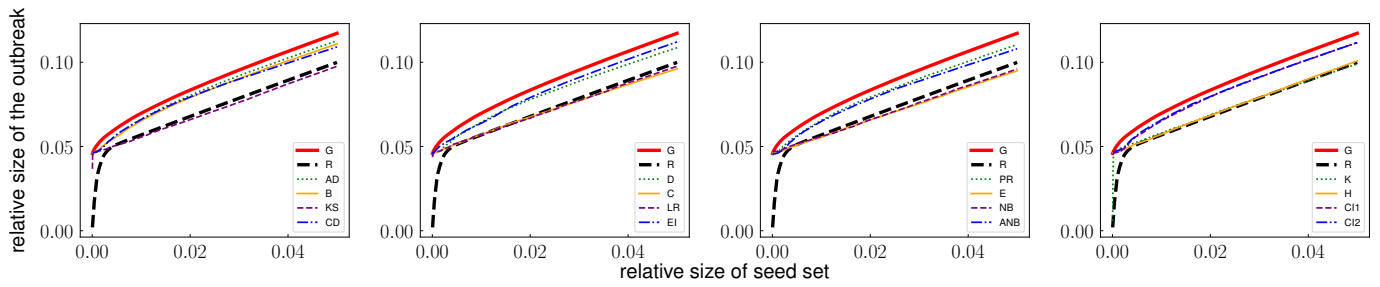

Figure 296: Internet -  $p=2.0p_c$

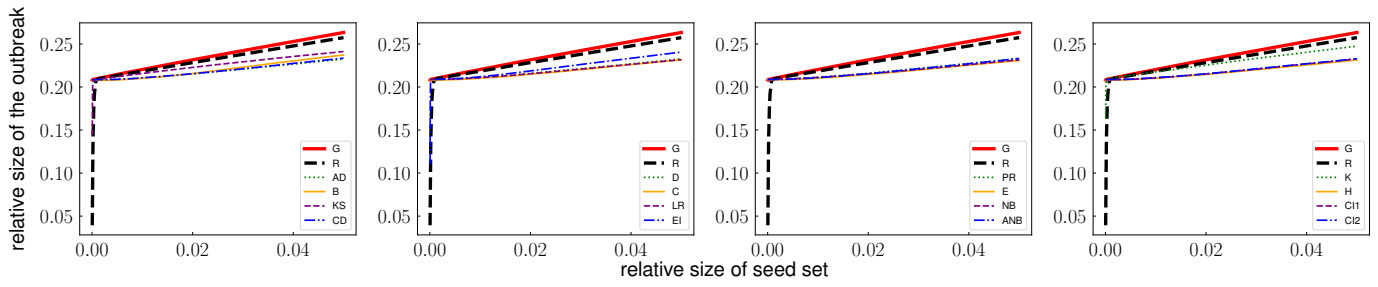

Figure 297: Thesaurus -  $p=2.0p_c$

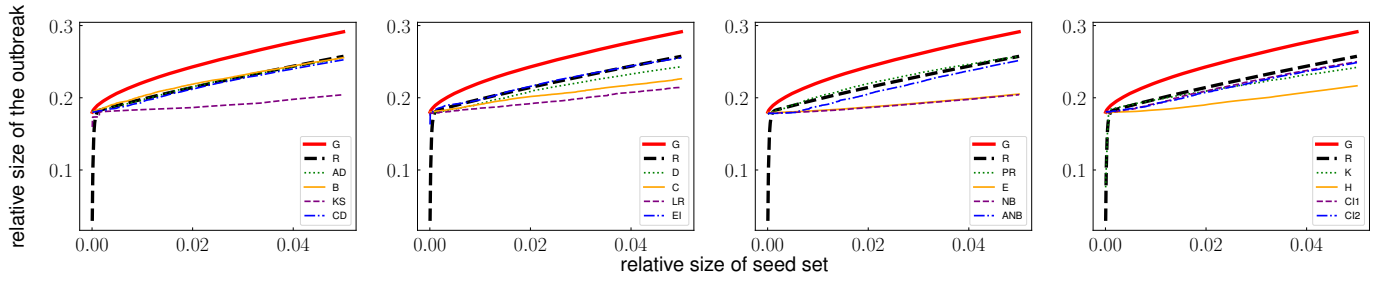

Figure 298: Cora -  $p=2.0p_c$

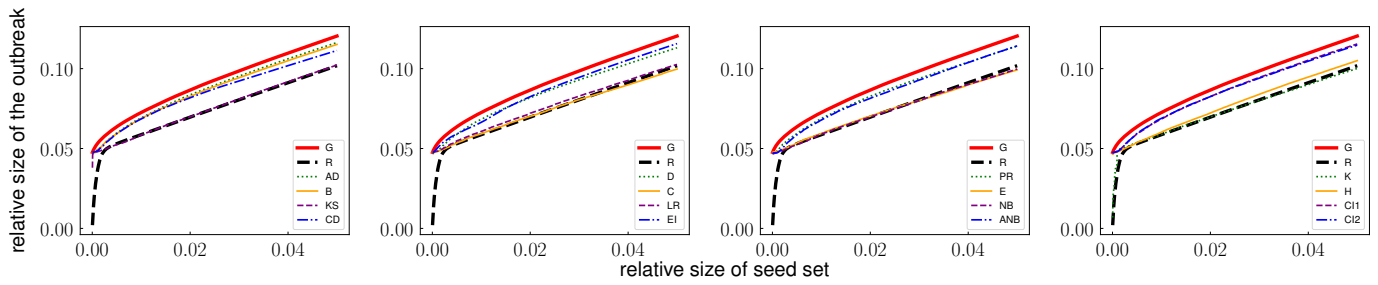

Figure 299: AS Caida -  $p=2.0p_c$



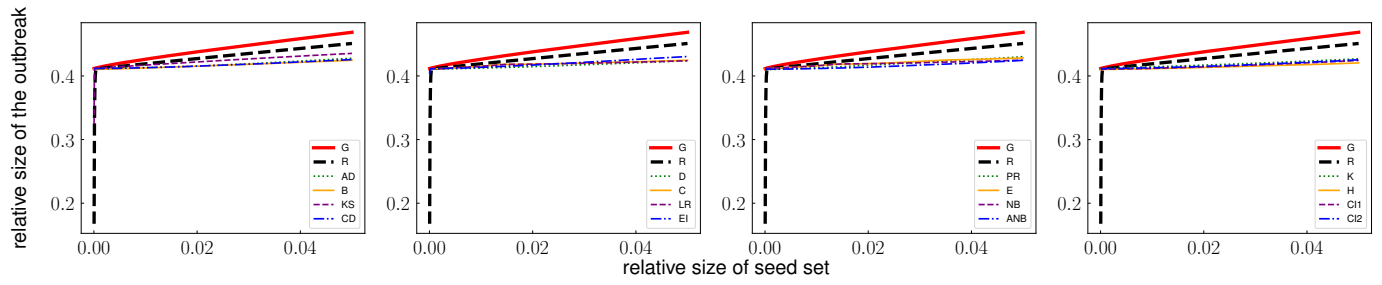

Figure 300: Gnutella, Aug. 24, 2002 -  $p=2.0p_c$

### 3 T=0.10

#### 3.1 Relative size of seed set vs relative size of the outbreak

##### 3.1.1 Subcritical Regime

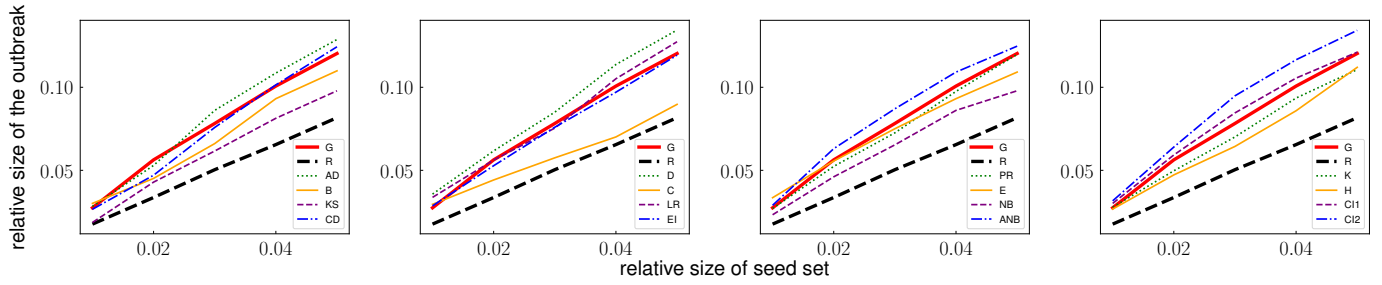

Figure 301: Political books -  $p=0.5p_c$



Figure 302: College football -  $p=0.5p_c$



Figure 303: S208 -  $p=0.5p_c$



Figure 304: High school, 2011 -  $p=0.5p_c$

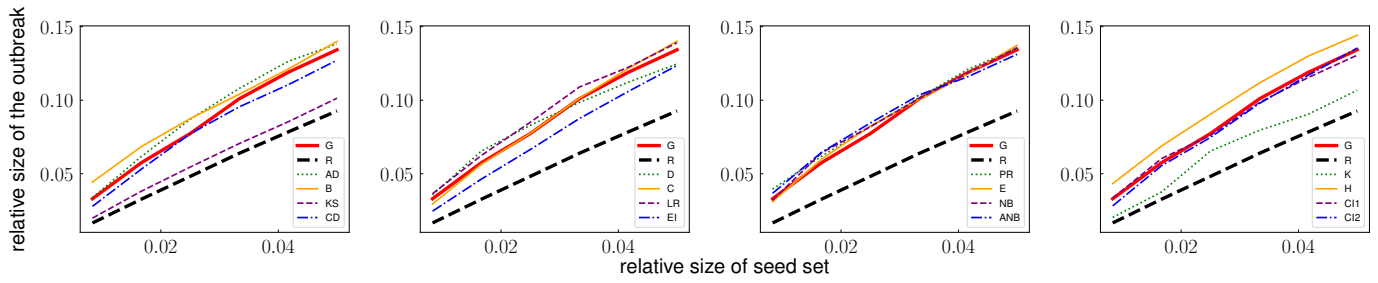

Figure 305: Bay Dry -  $p=0.5p_c$



Figure 306: Bay Wet -  $p=0.5p_c$



Figure 307: Radoslaw Email -  $p=0.5p_c$



Figure 308: High school, 2012 -  $p=0.5p_c$



Figure 309: Little Rock Lake -  $p=0.5p_c$

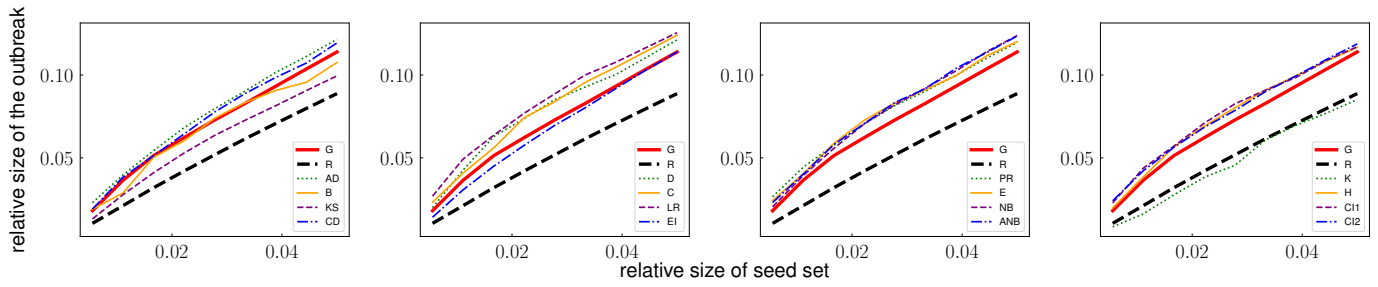

Figure 310: Jazz -  $p=0.5p_c$

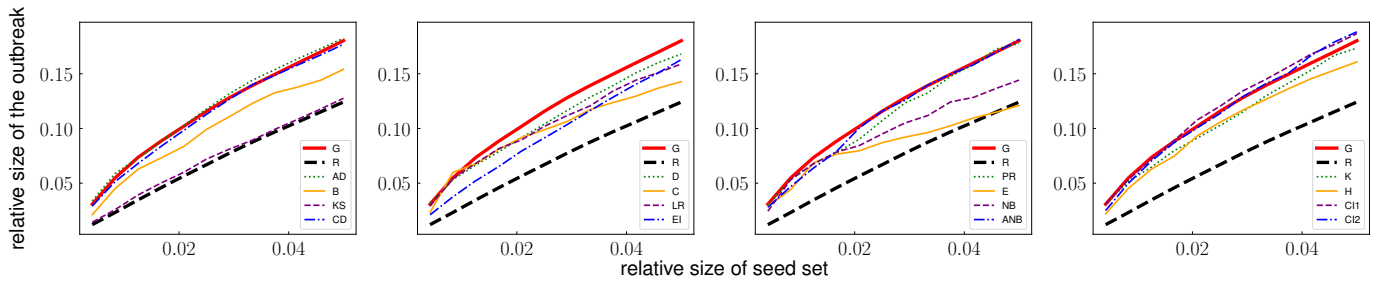

Figure 311: S420 -  $p=0.5p_c$

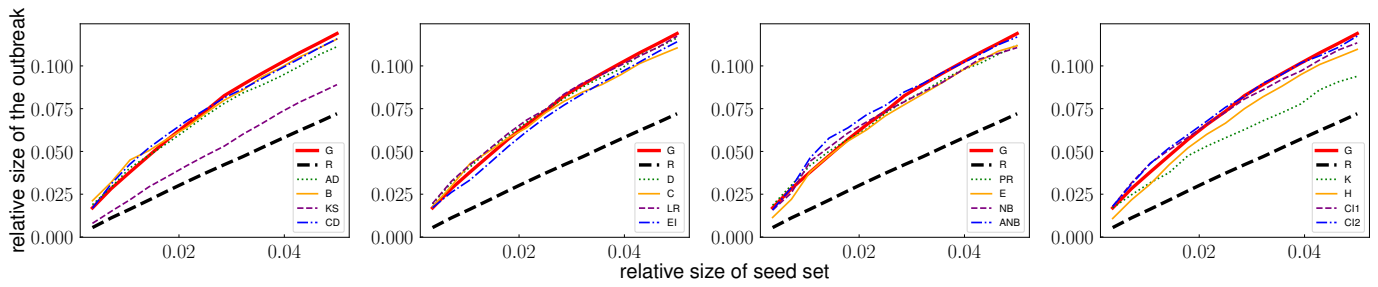

Figure 312: C. Elegans, neural -  $p=0.5p_c$

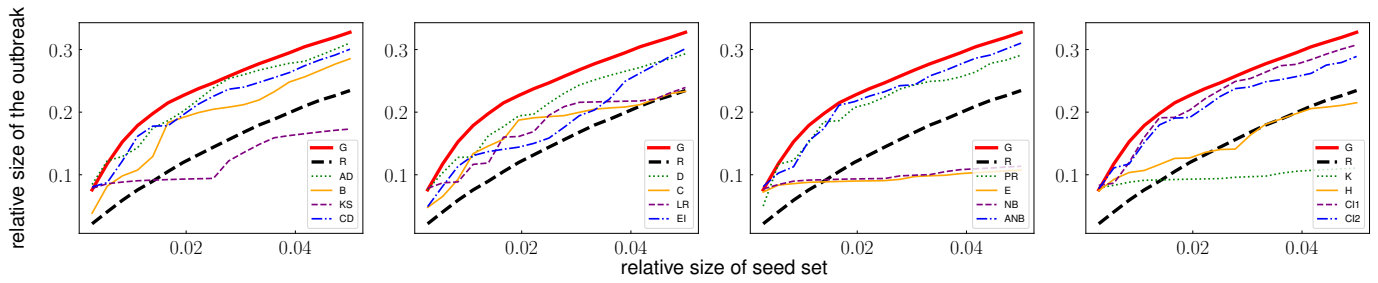

Figure 313: Network Science -  $p=0.5p_c$

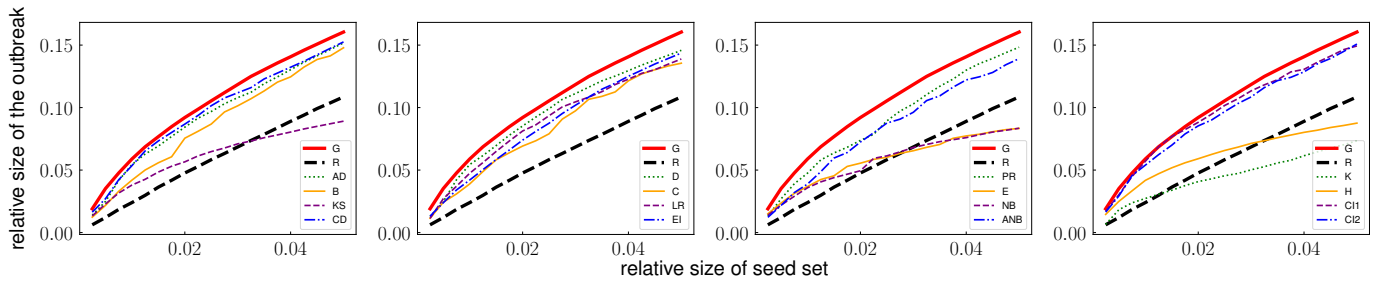

Figure 314: Dublin -  $p=0.5p_c$

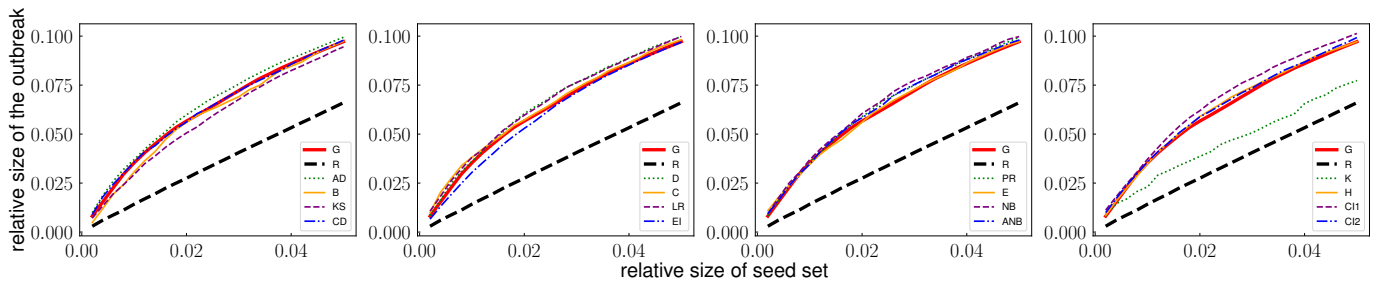

Figure 315: US Air Transportation -  $p=0.5p_c$



Figure 316: S838 -  $p=0.5p_c$



Figure 317: Yeast, transcription -  $p=0.5p_c$



Figure 318: Caltech -  $p=0.5p_c$

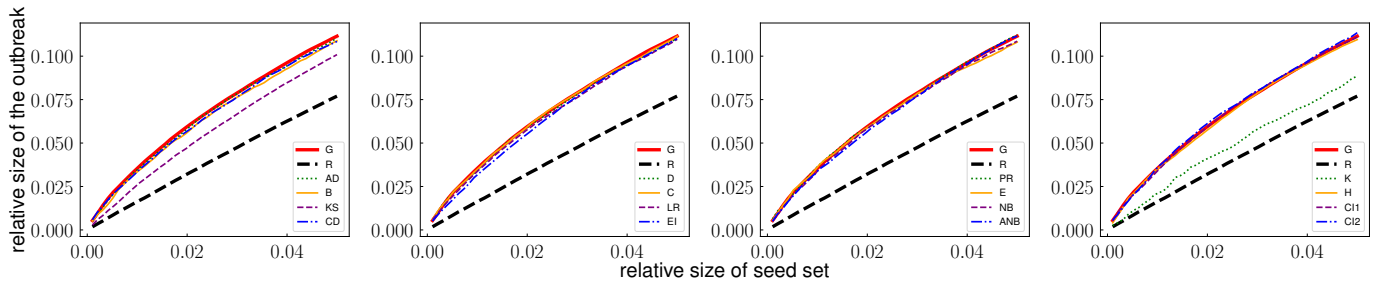

Figure 319: Reed -  $p=0.5p_c$

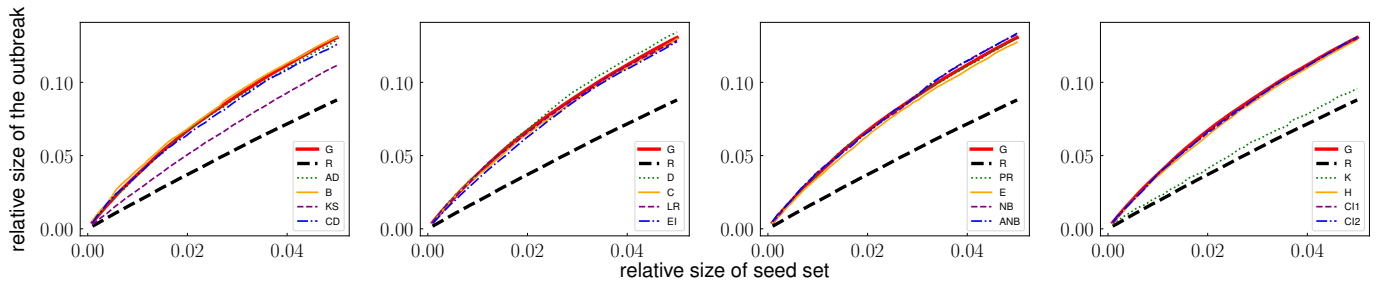

Figure 320: Mouse retina -  $p=0.5p_c$

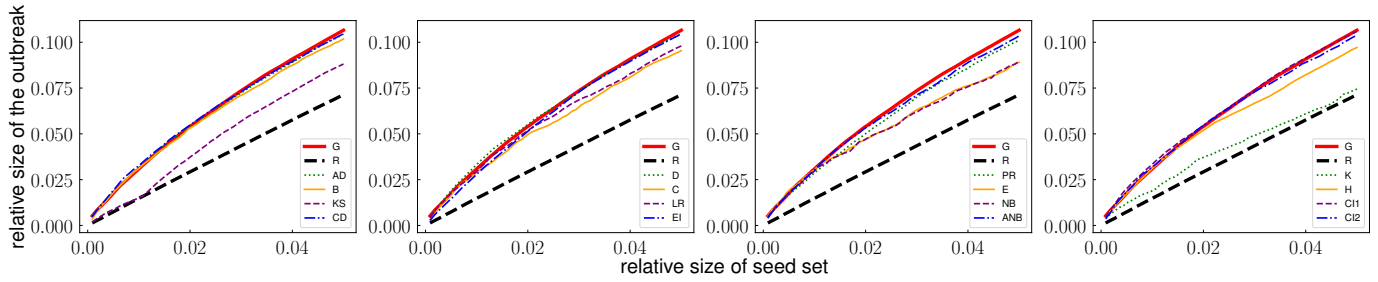

Figure 321: URV email -  $p=0.5p_c$



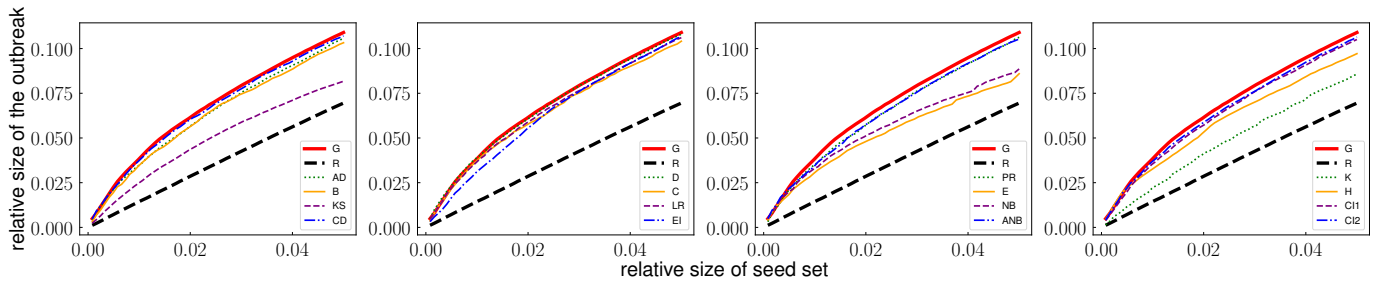

Figure 322: Political blogs -  $p=0.5p_c$

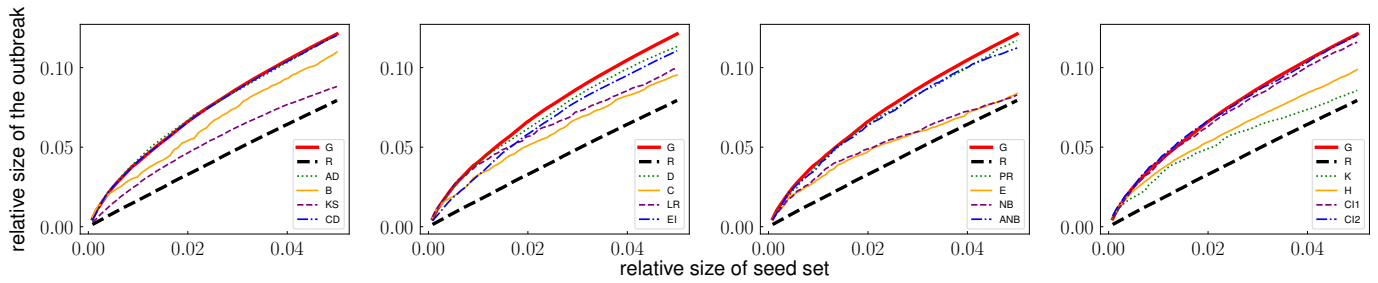

Figure 323: Air traffic -  $p=0.5p_c$

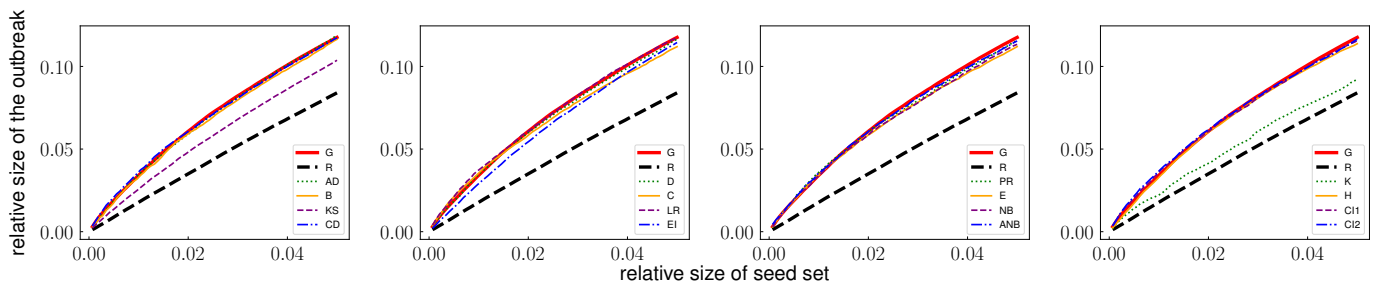

Figure 324: Haverford -  $p=0.5p_c$



Figure 325: Simmons -  $p=0.5p_c$

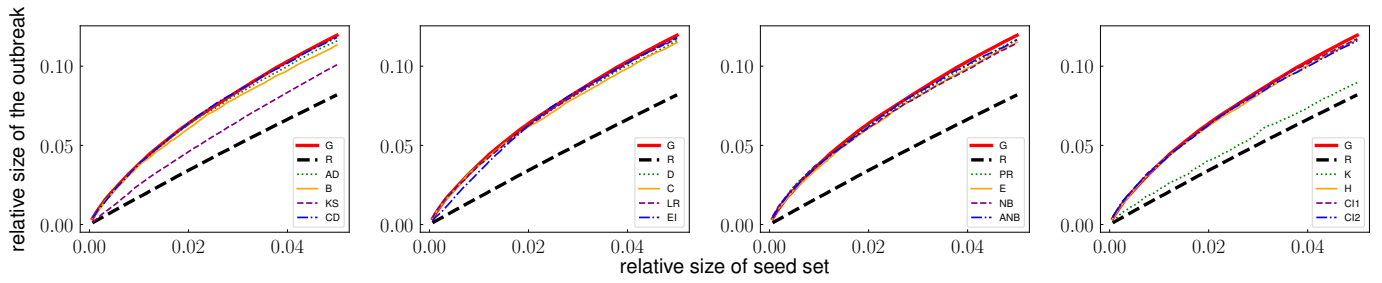

Figure 326: Swarthmore -  $p=0.5p_c$

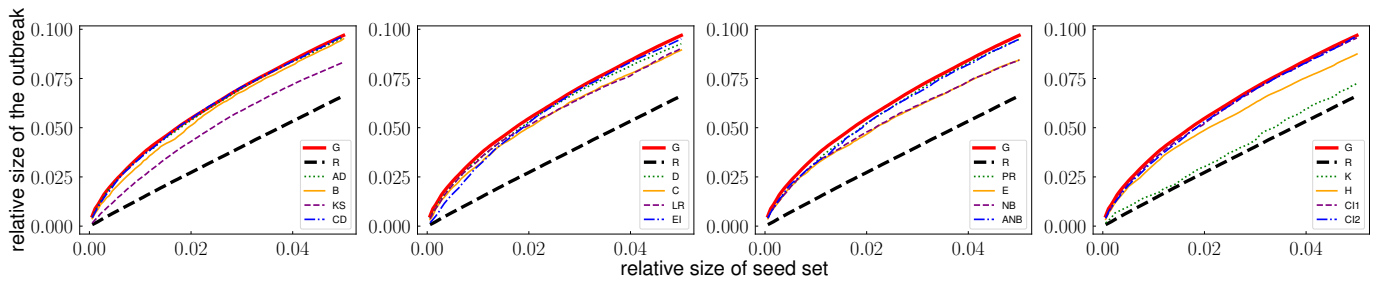

Figure 327: Petster, hamster -  $p=0.5p_c$



Figure 328: UC Irvine -  $p=0.5p_c$



Figure 329: Yeast, protein -  $p=0.5p_c$



Figure 330: Amherst -  $p=0.5p_c$



Figure 331: Bowdoin -  $p=0.5p_c$



Figure 332: Hamilton -  $p=0.5p_c$



Figure 333: Adolescent health -  $p=0.5p_c$

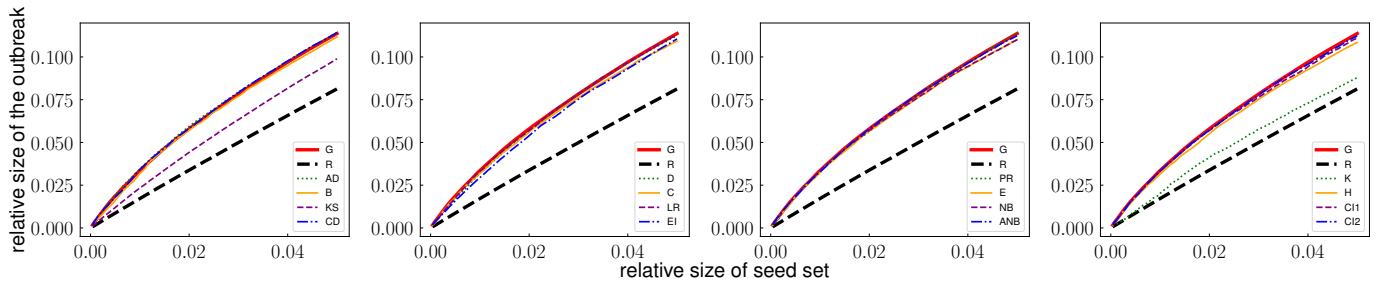

Figure 334: Trinity -  $p=0.5p_c$

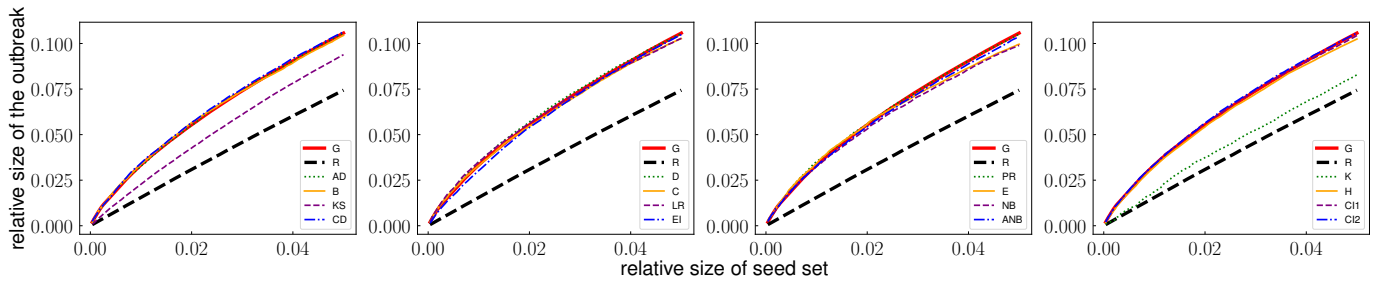

Figure 335: USFCA -  $p=0.5p_c$

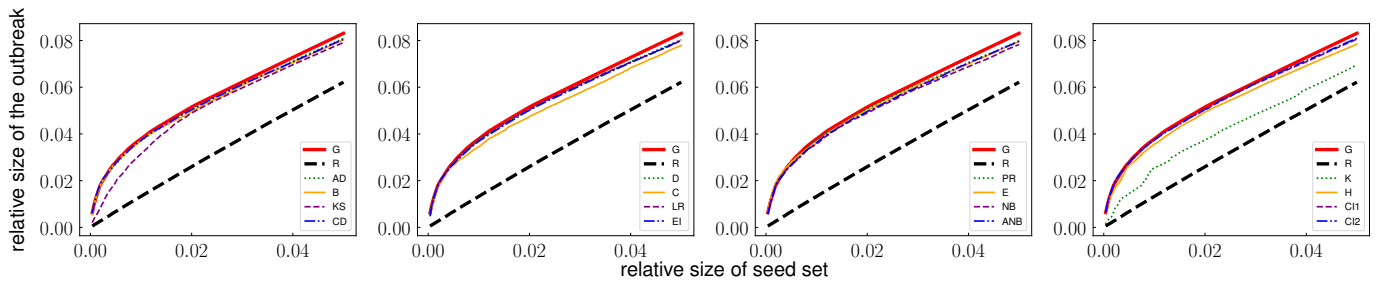

Figure 336: Japanese -  $p=0.5p_c$

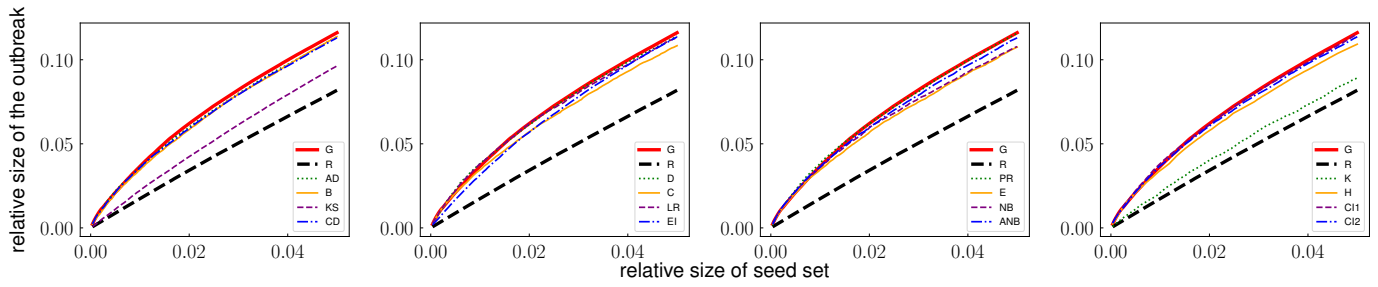

Figure 337: Williams -  $p=0.5p_c$

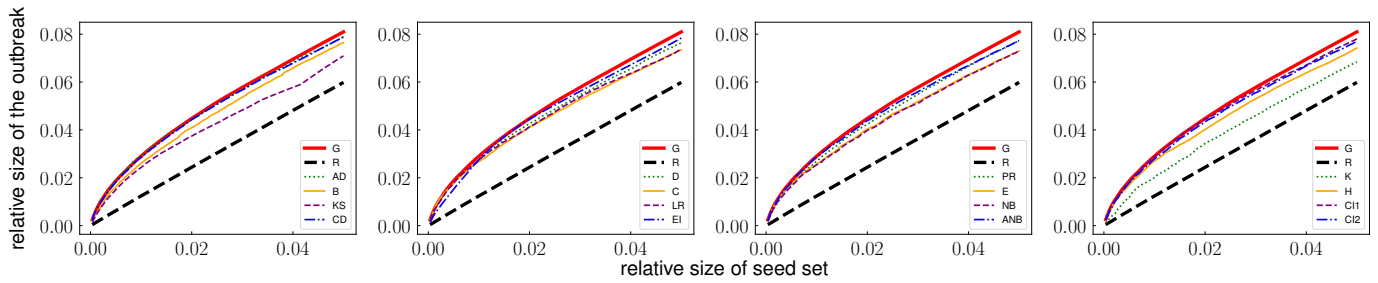

Figure 338: Open flights -  $p=0.5p_c$

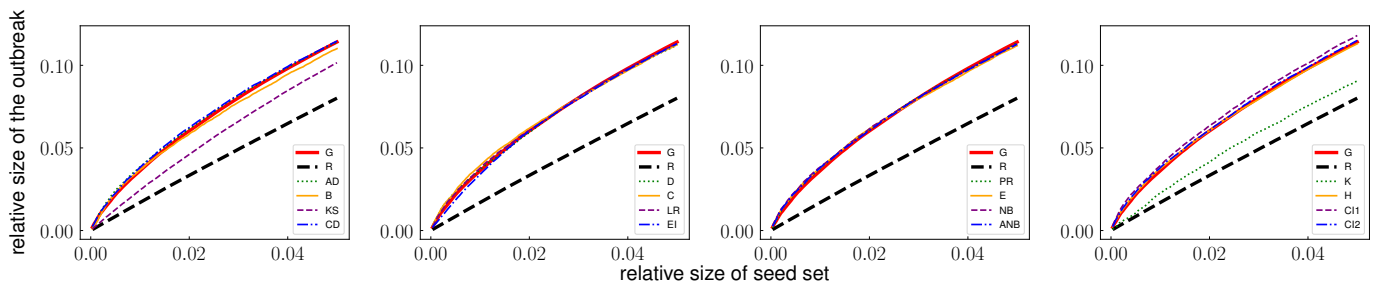

Figure 339: Oberlin -  $p=0.5p_c$



Figure 340: Smith -  $p=0.5p_c$



Figure 341: Wellesley -  $p=0.5p_c$



Figure 342: Vassar -  $p=0.5p_c$



Figure 343: Middlebury -  $p=0.5p_c$



Figure 344: Pepperdine -  $p=0.5p_c$



Figure 345: Colgate -  $p=0.5p_c$



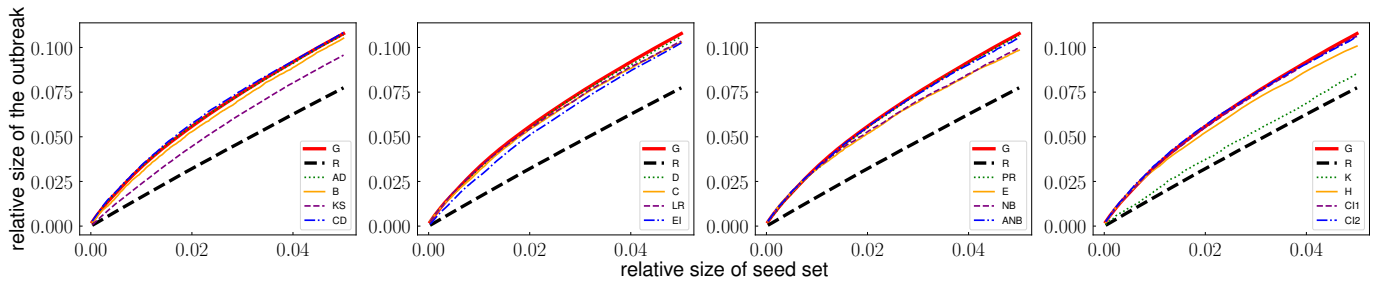

Figure 346: Santa -  $p=0.5p_c$

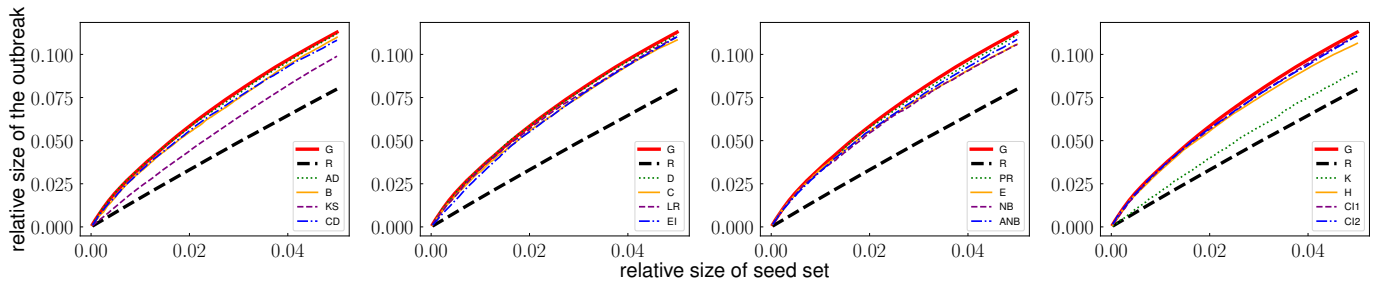

Figure 347: Wesleyan -  $p=0.5p_c$

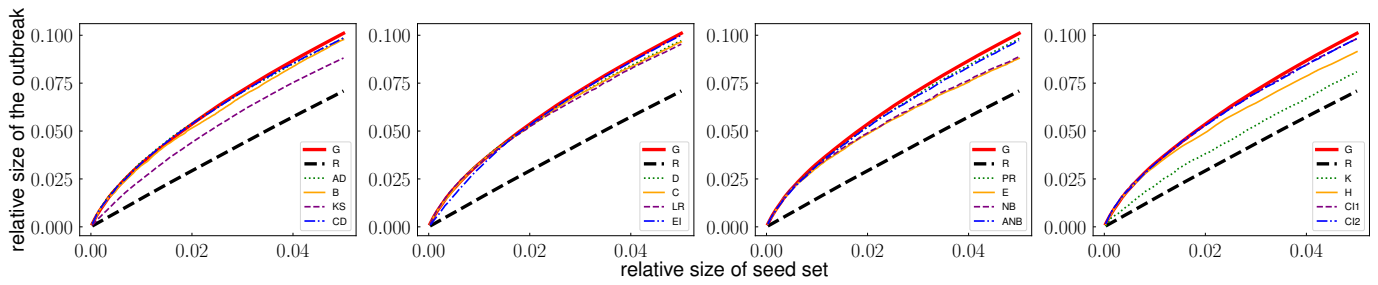

Figure 348: Mich -  $p=0.5p_c$



Figure 349: Bitcoin Alpha -  $p=0.5p_c$



Figure 350: Bucknell -  $p=0.5p_c$



Figure 351: Brandeis -  $p=0.5p_c$

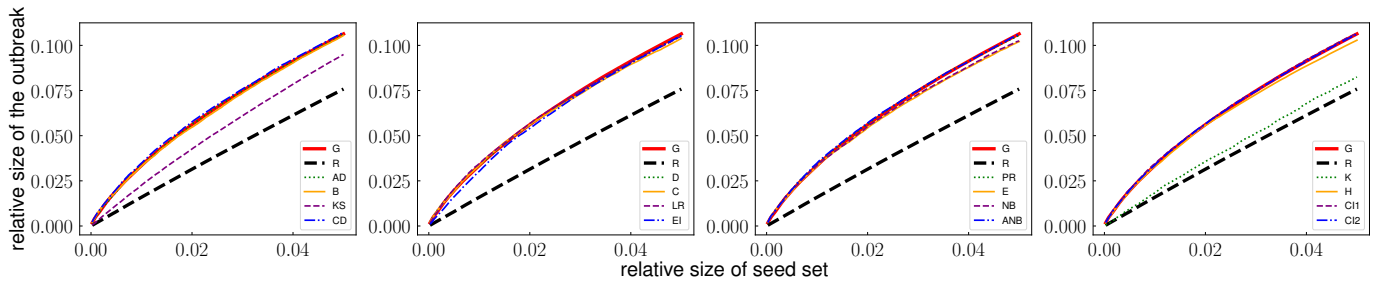

Figure 352: Howard -  $p=0.5p_c$

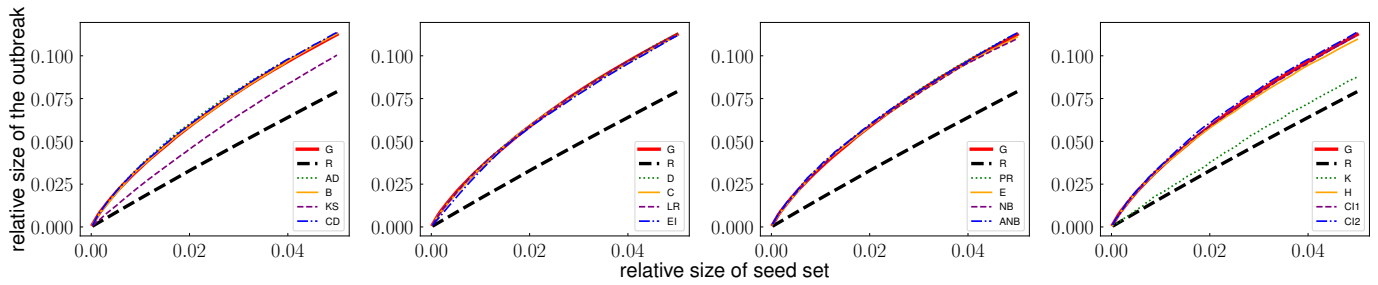

Figure 353: Rice -  $p=0.5p_c$

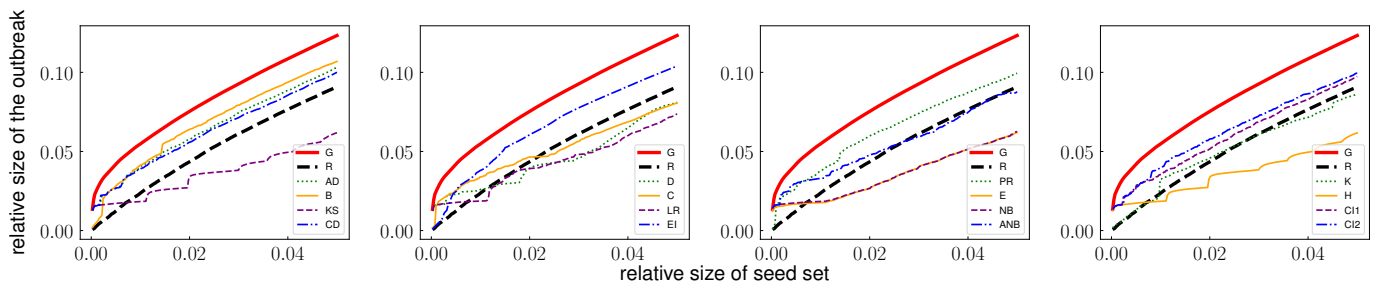

Figure 354: GR-QC, 1993-2003 -  $p=0.5p_c$

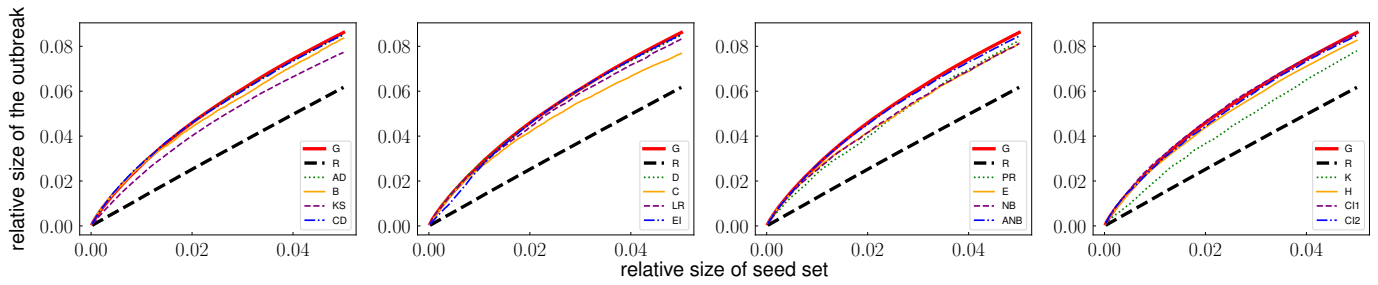

Figure 355: Tennis -  $p=0.5p_c$

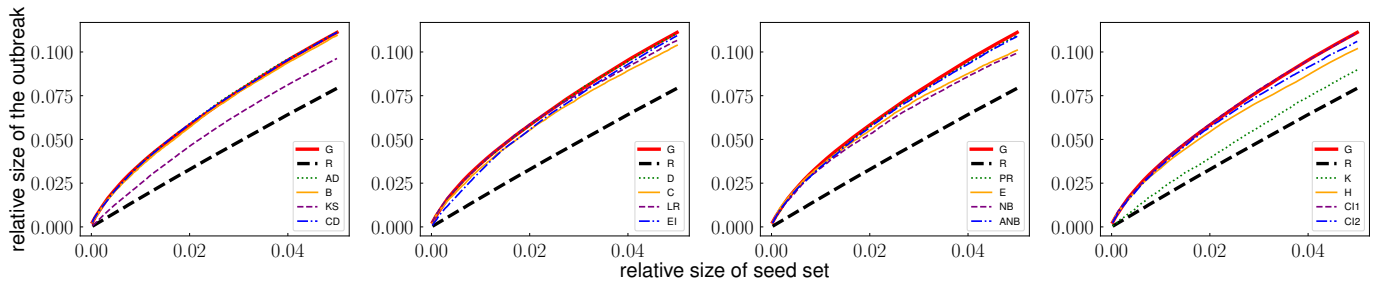

Figure 356: Rochester -  $p=0.5p_c$

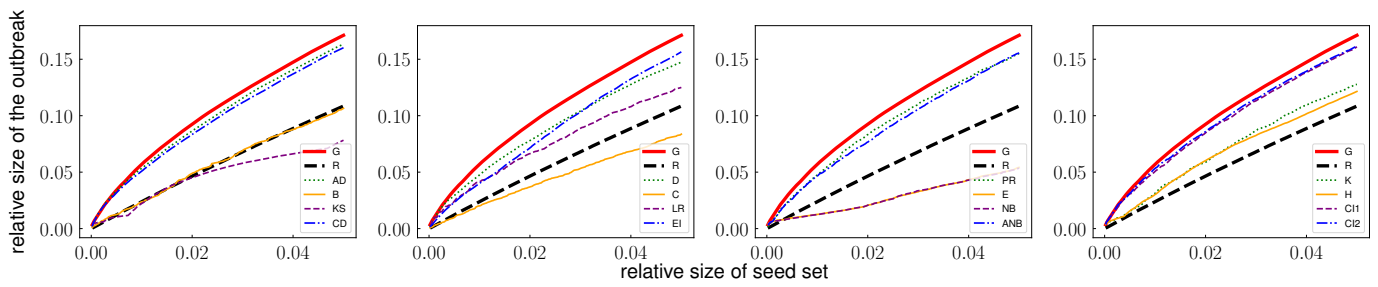

Figure 357: US Power grid -  $p=0.5p_c$

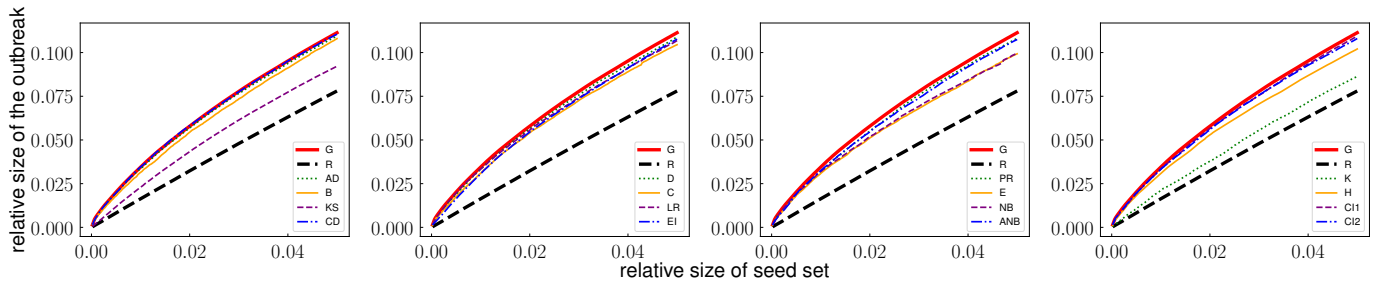

Figure 358: Lehigh -  $p=0.5p_c$

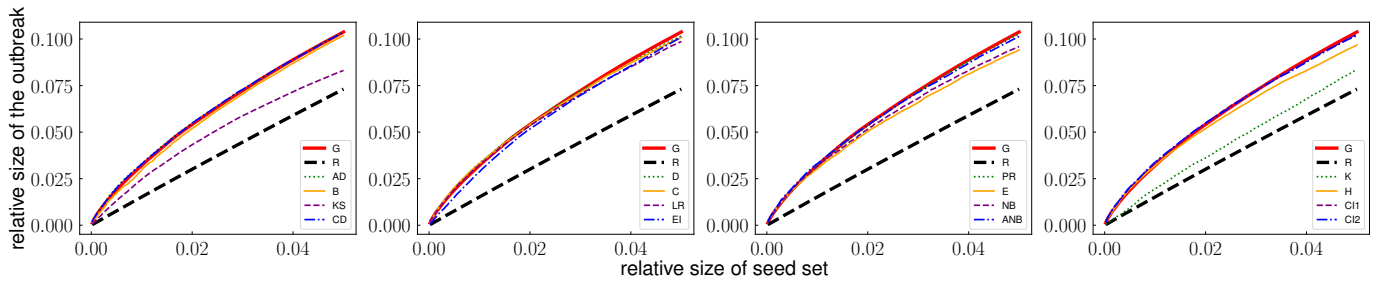

Figure 359: Johns Hopkins -  $p=0.5p_c$

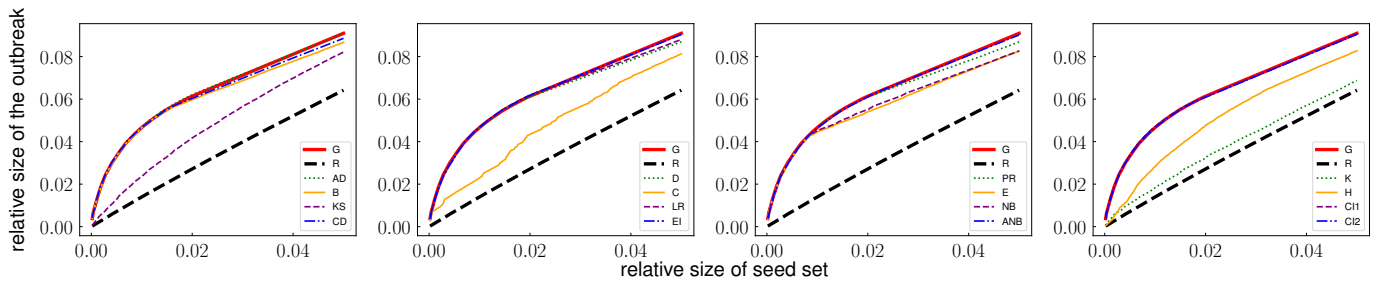

Figure 360: HT09 -  $p=0.5p_c$

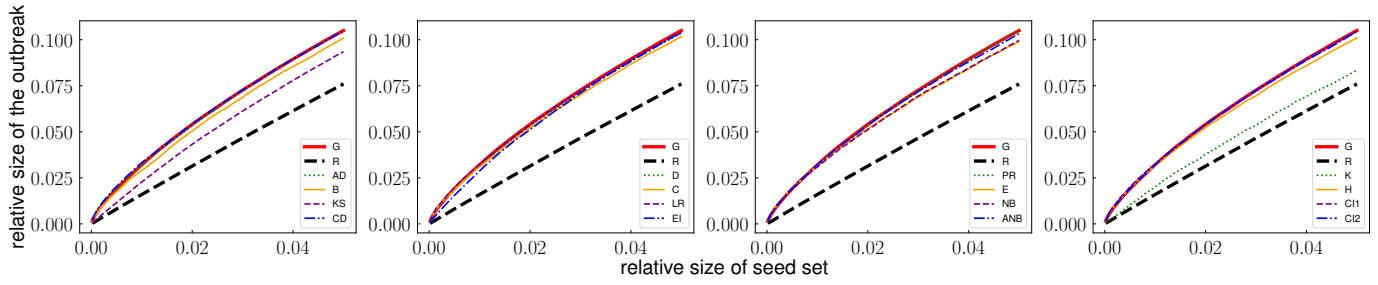

Figure 361: Wake -  $p=0.5p_c$

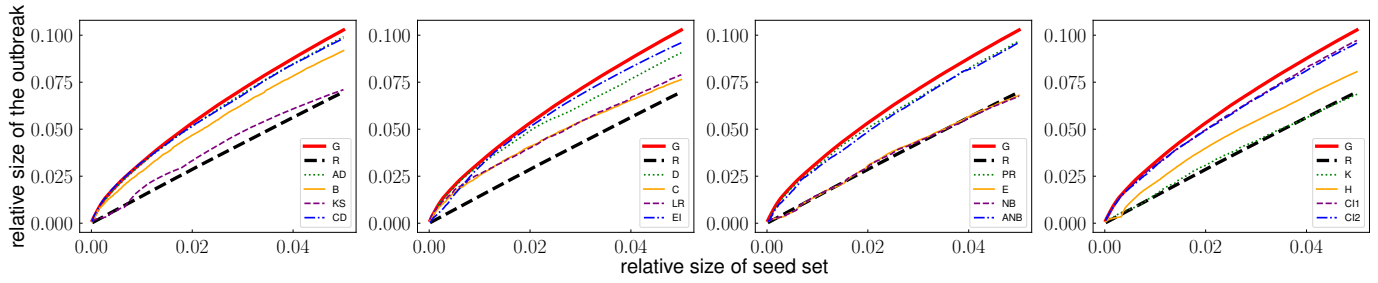

Figure 362: Hep-Th, 1995-1999 -  $p=0.5p_c$

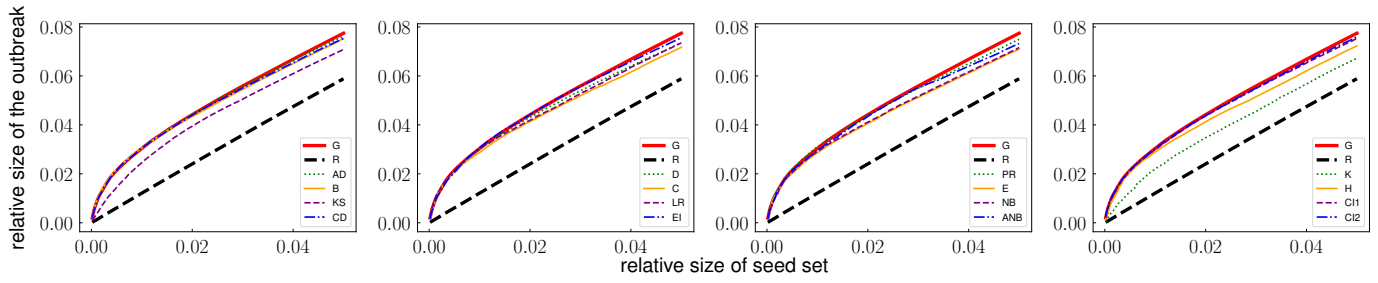

Figure 363: Bitcoin OTC -  $p=0.5p_c$

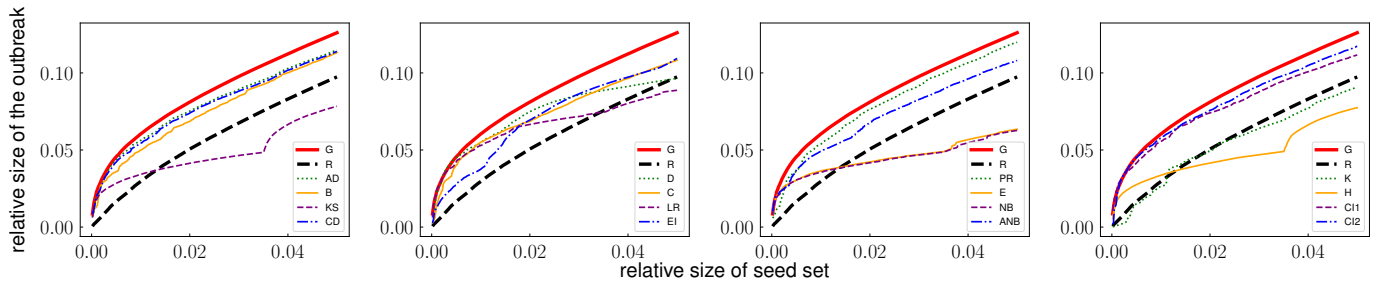

Figure 364: Reactome -  $p=0.5p_c$

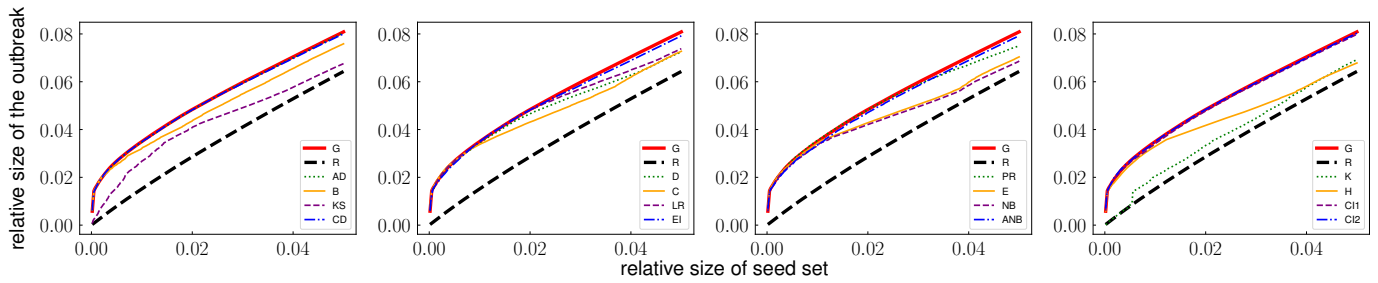

Figure 365: Jung -  $p=0.5p_c$

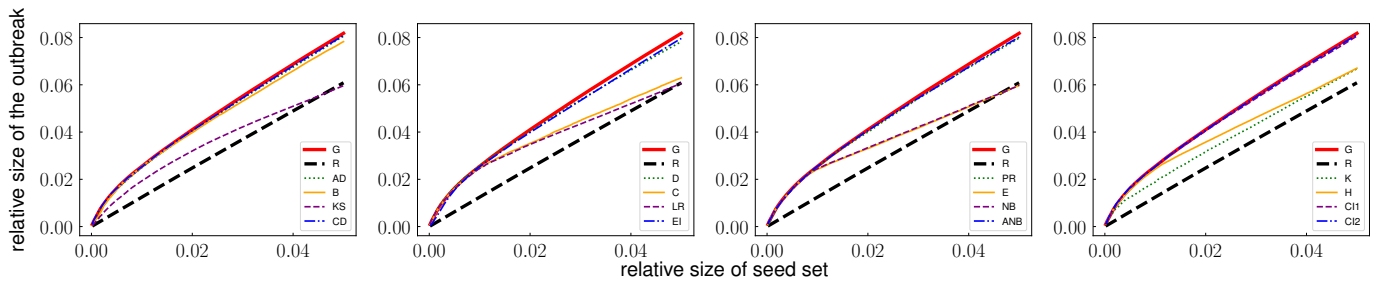

Figure 366: Gnutella, Aug. 8, 2002 -  $p=0.5p_c$

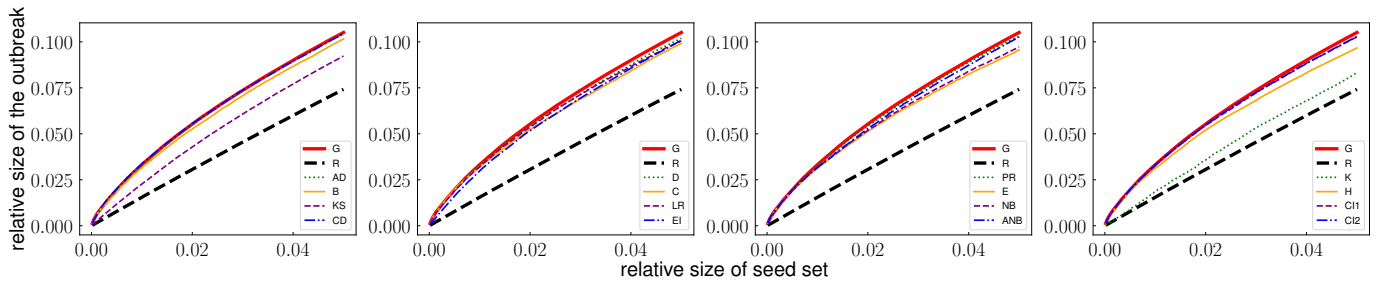

Figure 367: American -  $p=0.5p_c$

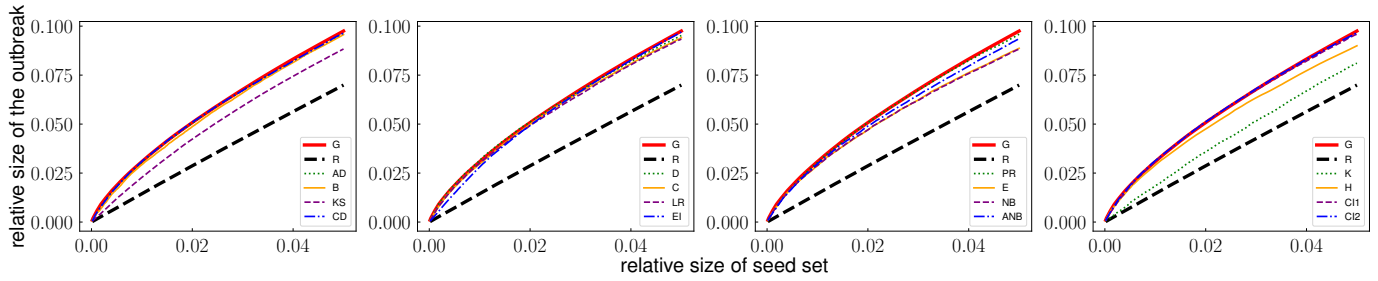

Figure 368: MIT -  $p=0.5p_c$

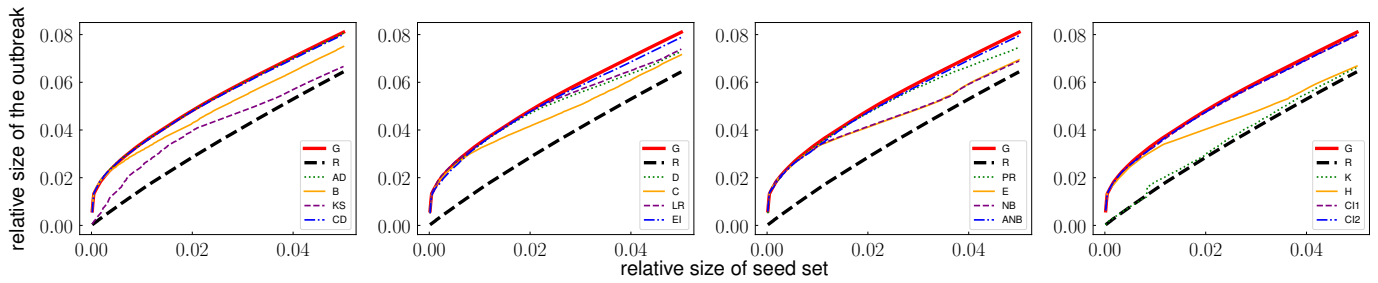

Figure 369: JDK -  $p=0.5p_c$



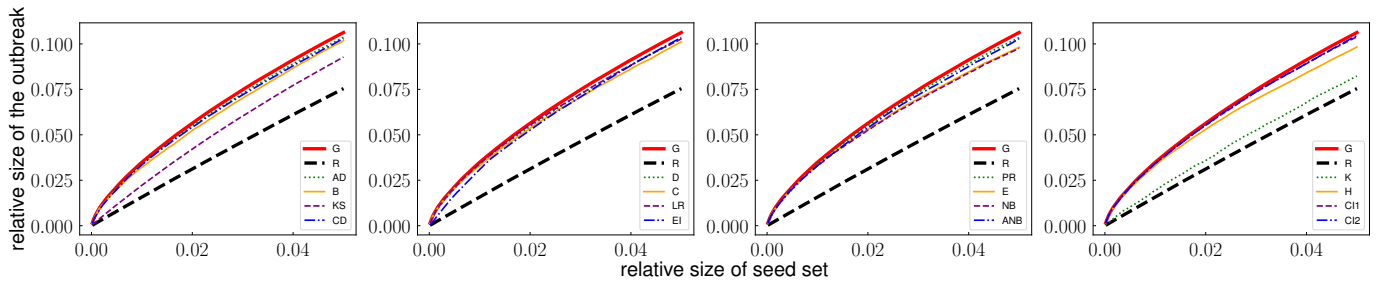

Figure 370: William -  $p=0.5p_c$

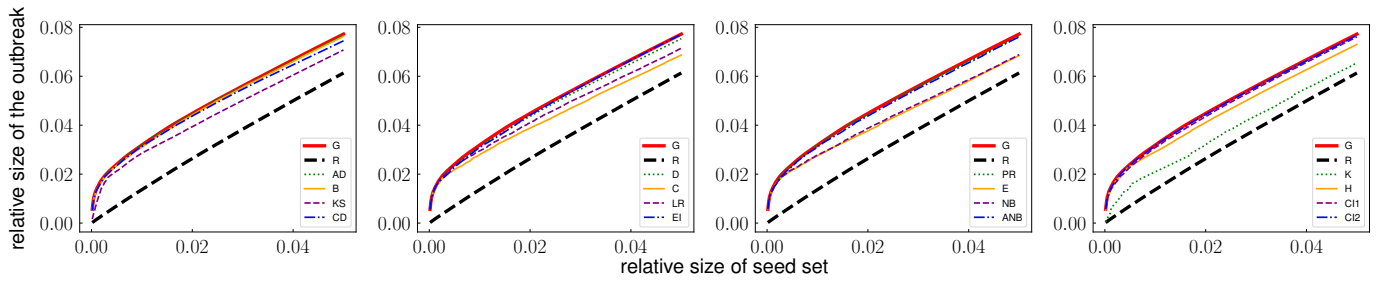

Figure 371: AS Oregon -  $p=0.5p_c$

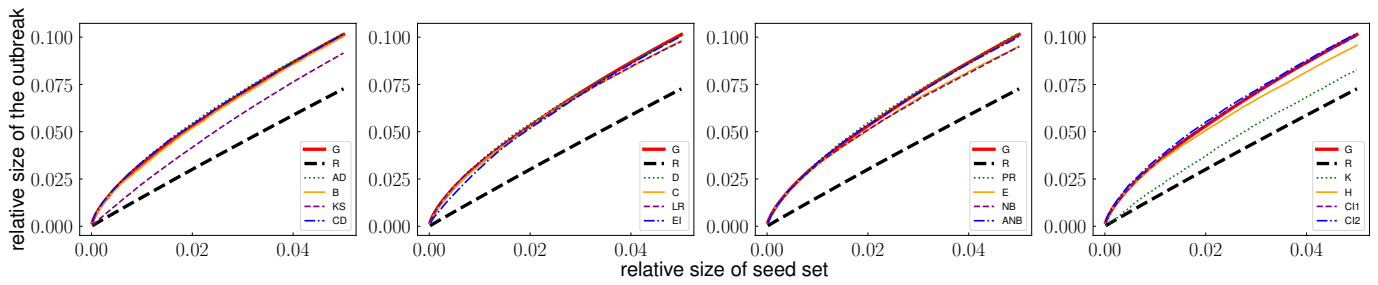

Figure 372: UChicago -  $p=0.5p_c$

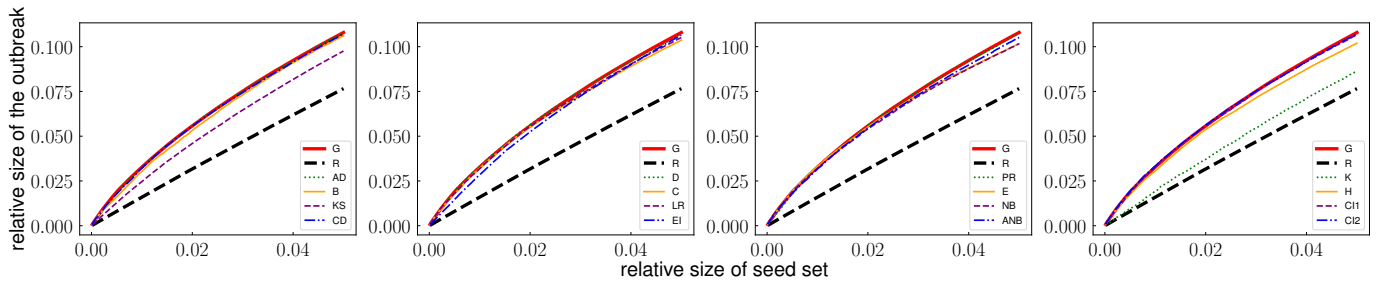

Figure 373: Princeton -  $p=0.5p_c$

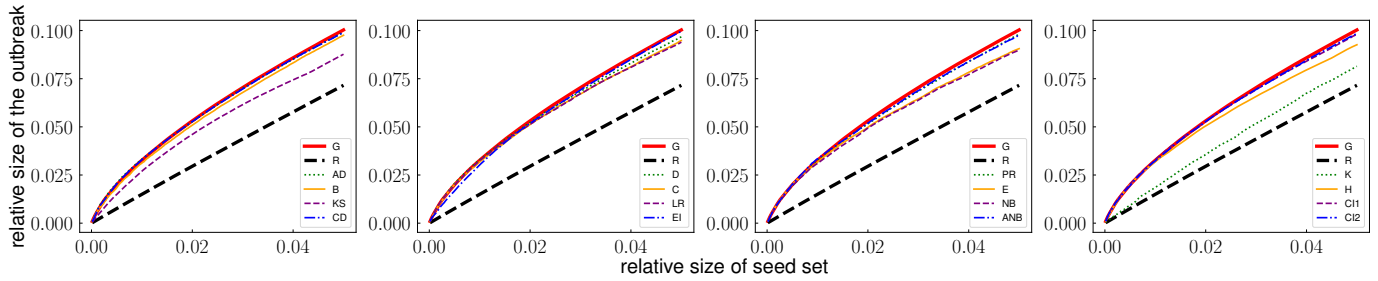

Figure 374: Carnegie -  $p=0.5p_c$

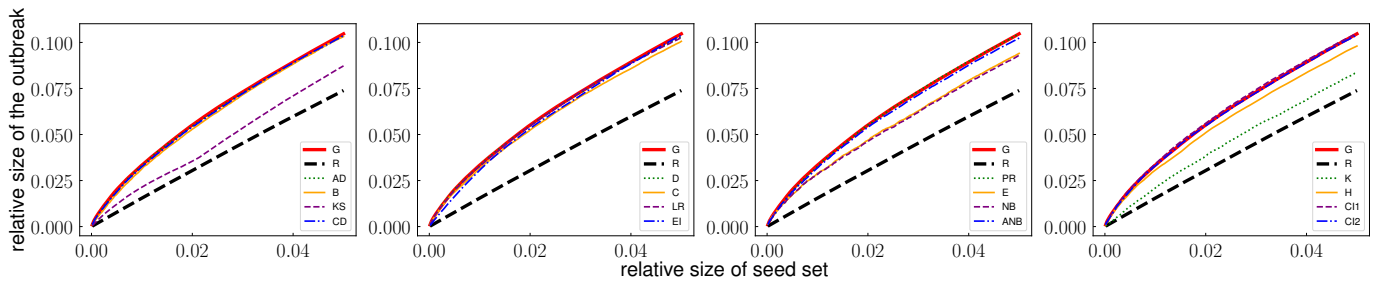

Figure 375: Tufts -  $p=0.5p_c$



Figure 376: UC -  $p=0.5p_c$

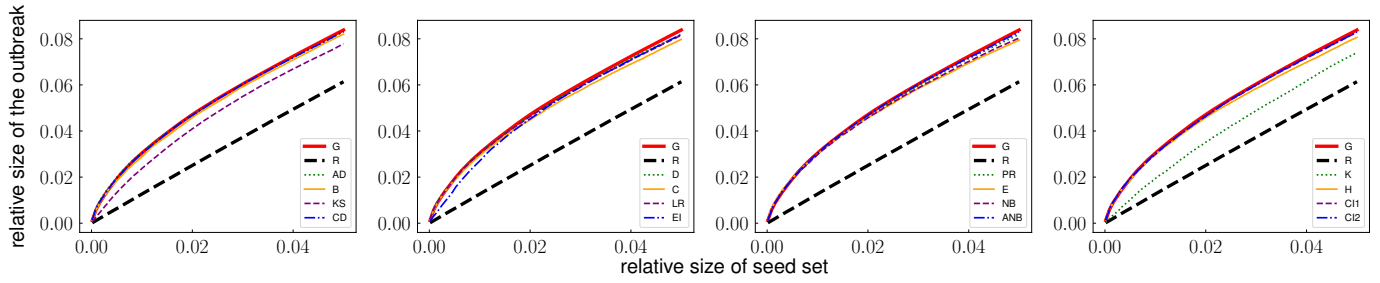

Figure 377: Wikipedia elections -  $p=0.5p_c$

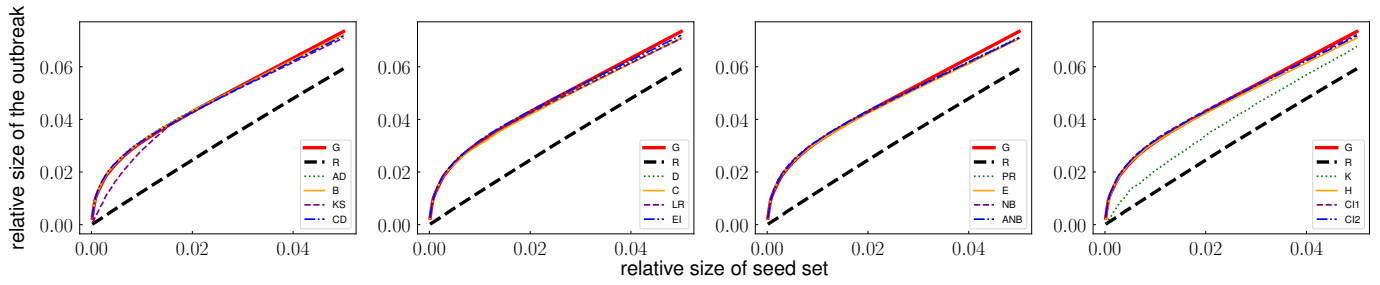

Figure 378: English -  $p=0.5p_c$



Figure 379: Gnutella, Aug. 9, 2002 -  $p=0.5p_c$



Figure 380: French -  $p=0.5p_c$



Figure 381: Hep-Th, 1993-2003 -  $p=0.5p_c$

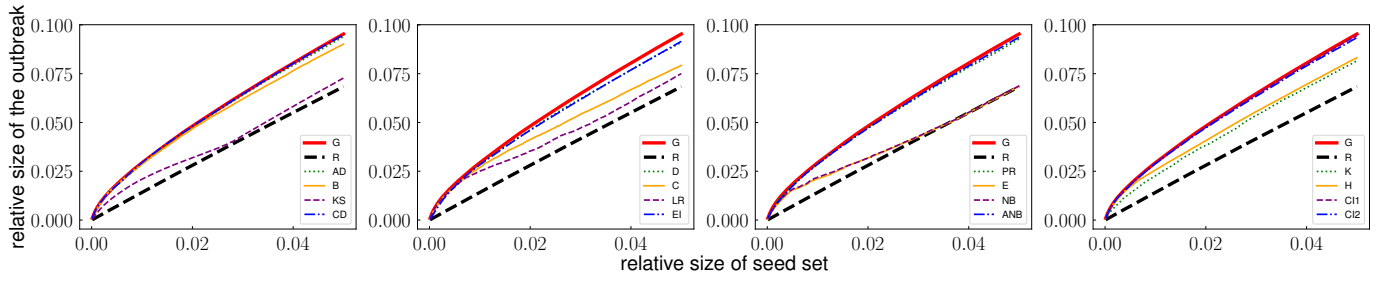

Figure 382: Gnutella, Aug. 6, 2002 -  $p=0.5p_c$

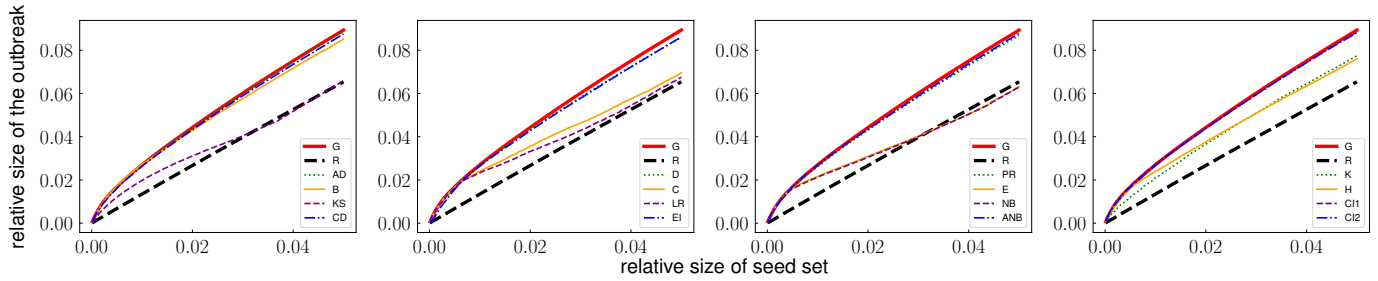

Figure 383: Gnutella, Aug. 5, 2002 -  $p=0.5p_c$

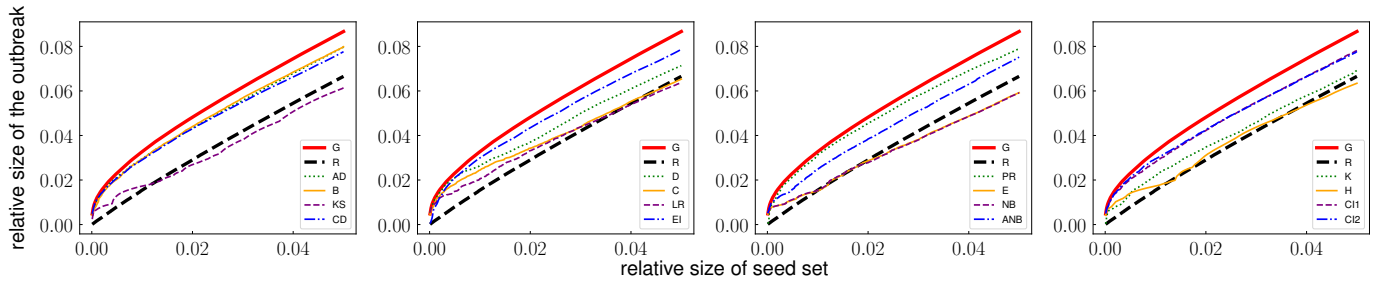

Figure 384: PGP -  $p=0.5p_c$

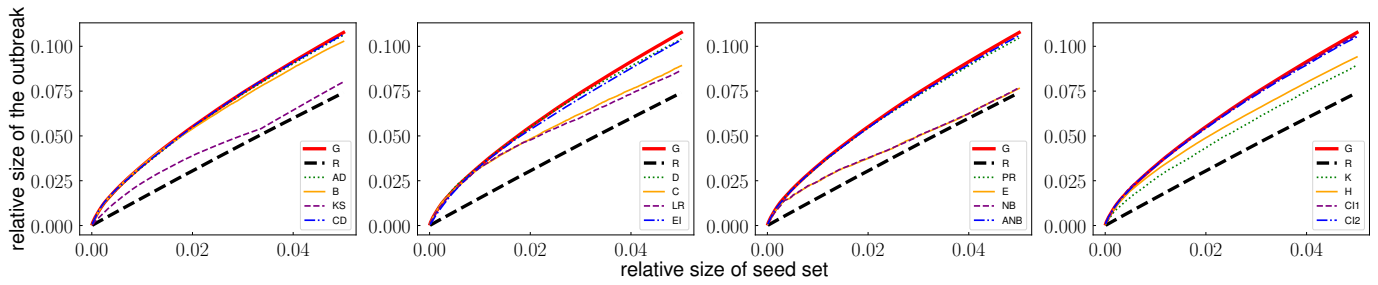

Figure 385: Gnutella, Aug. 4, 2002 -  $p=0.5p_c$

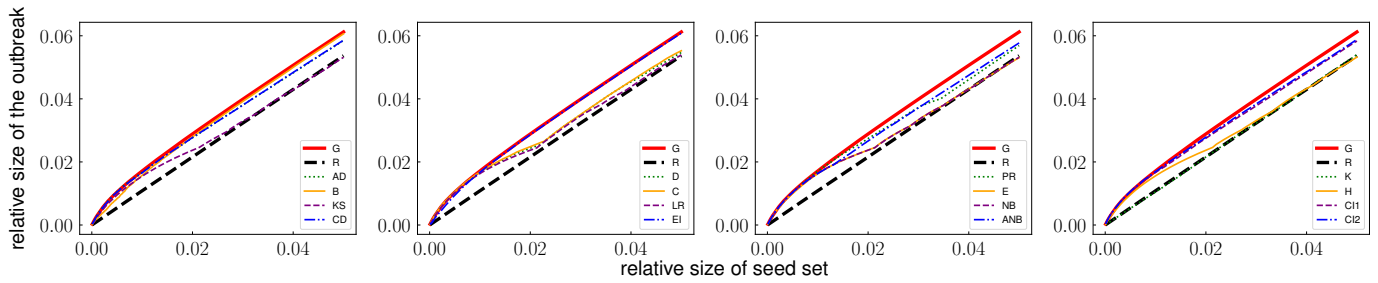

Figure 386: Hep-Ph, 1993-2003 -  $p=0.5p_c$

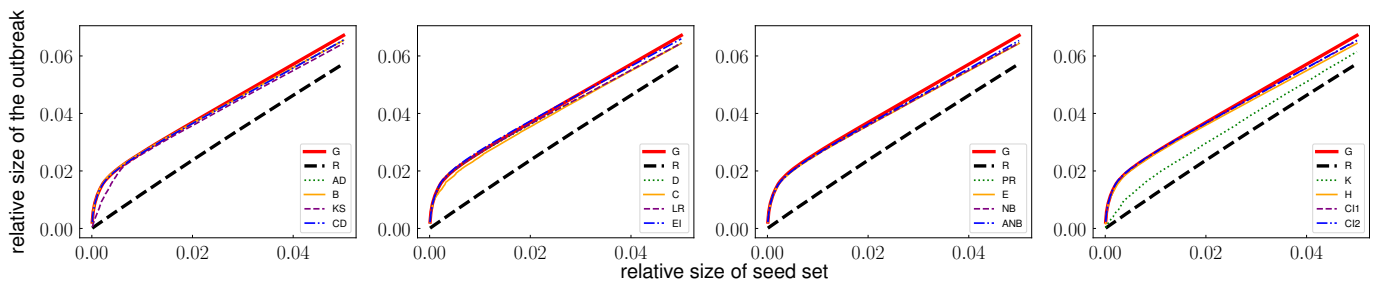

Figure 387: Spanish 1 -  $p=0.5p_c$

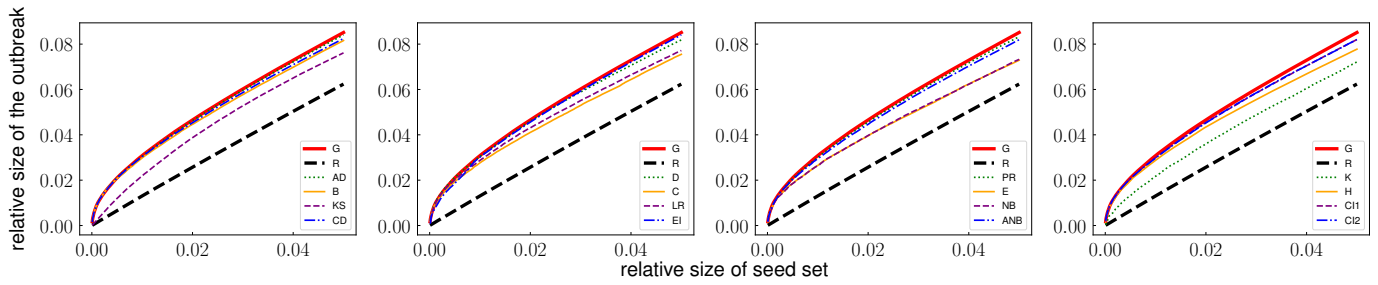

Figure 388: DBLP, citations -  $p=0.5p_c$

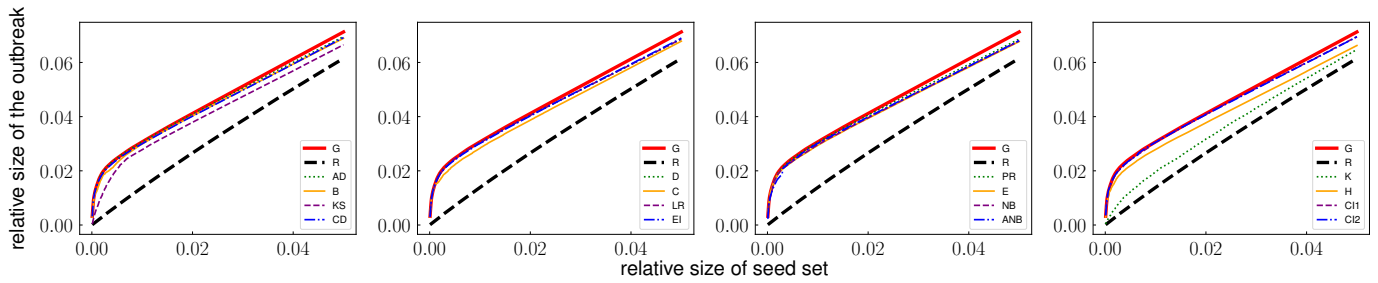

Figure 389: Spanish 2 -  $p=0.5p_c$

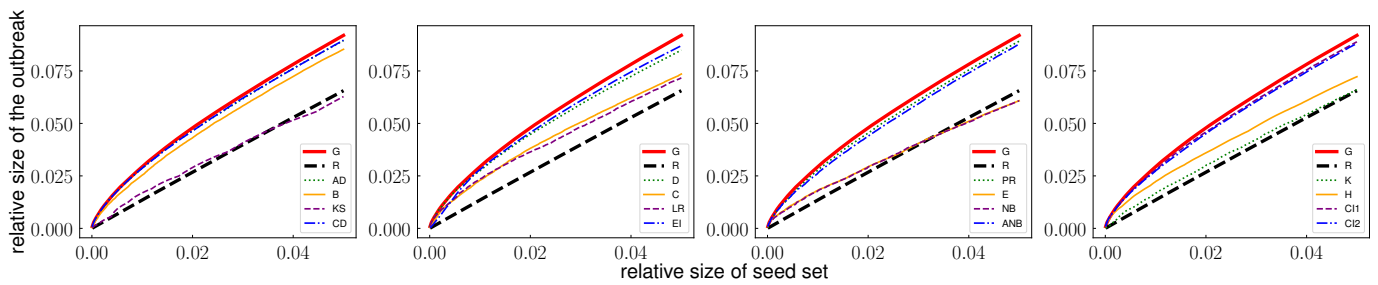

Figure 390: Cond-Mat, 1995-1999 -  $p=0.5p_c$



Figure 391: Astrophysics -  $p=0.5p_c$



Figure 392: AstroPhys, 1993-2003 -  $p=0.5p_c$



Figure 393: Marvel -  $p=0.5p_c$





Figure 394: Cond-Mat, 1993-2003 -  $p=0.5p_c$



Figure 395: Gnutella, Aug. 25, 2002 -  $p=0.5p_c$

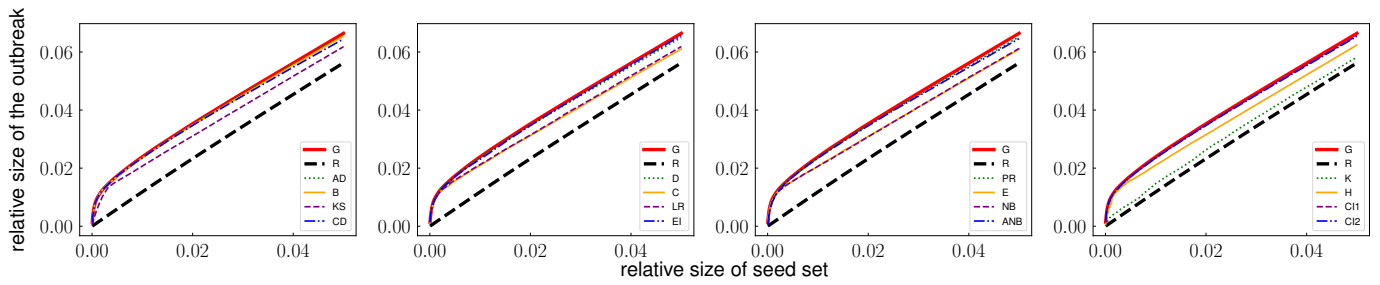

Figure 396: Internet -  $p=0.5p_c$

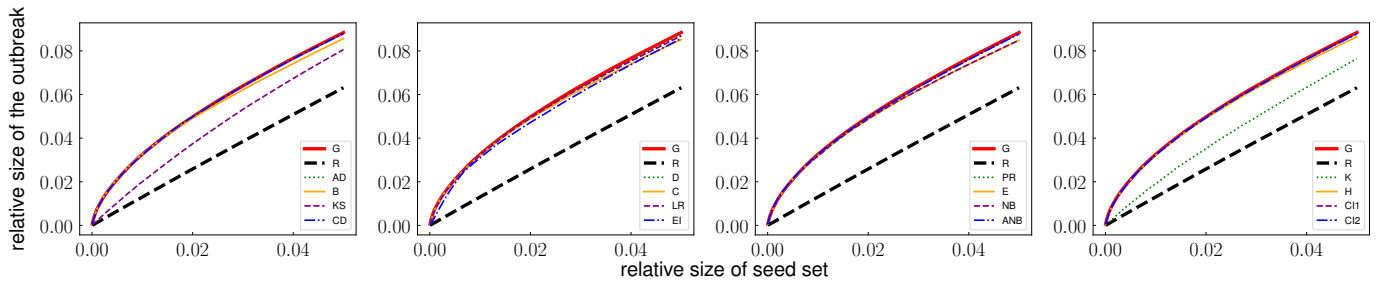

Figure 397: Thesaurus -  $p=0.5p_c$

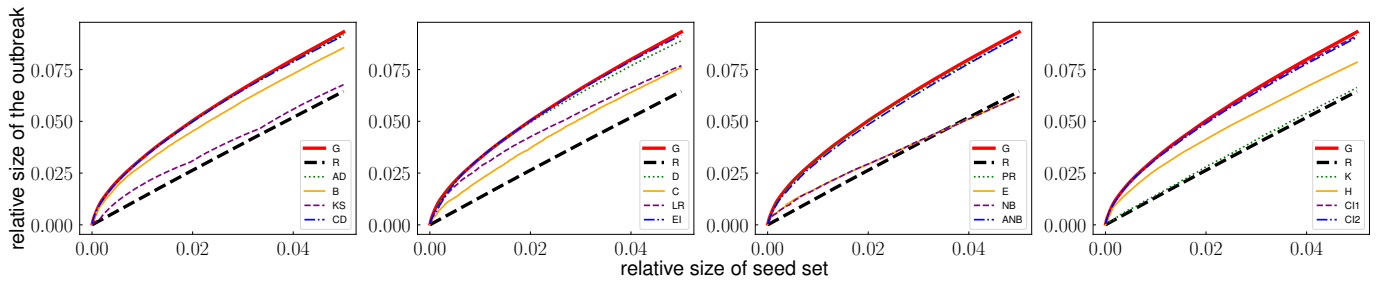

Figure 398: Cora -  $p=0.5p_c$

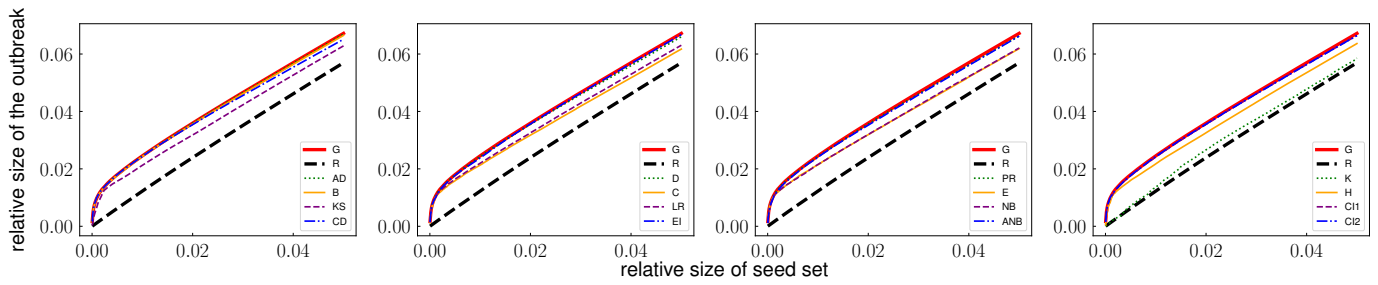

Figure 399: AS Caida -  $p=0.5p_c$



Figure 400: Gnutella, Aug. 24, 2002 -  $p=0.5p_c$

### 3.1.2 Critical Regime

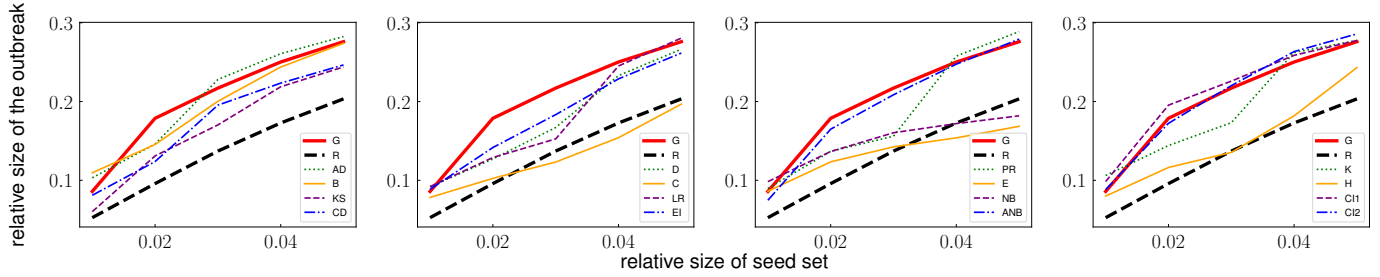

Figure 401: Political books -  $p=1.0p_c$

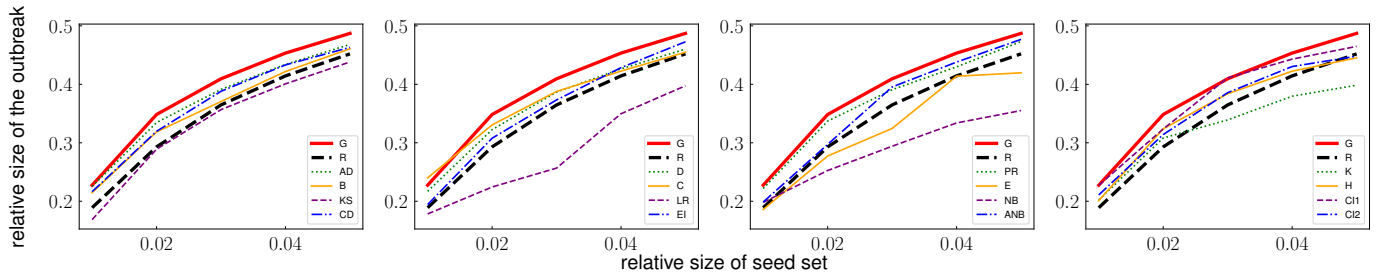

Figure 402: College football -  $p=1.0p_c$

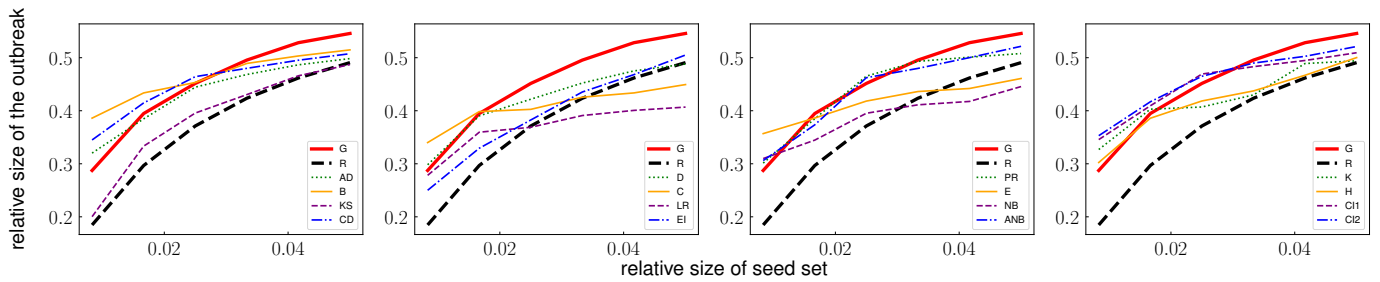

Figure 403: S208 -  $p=1.0p_c$



Figure 404: High school, 2011 -  $p=1.0p_c$

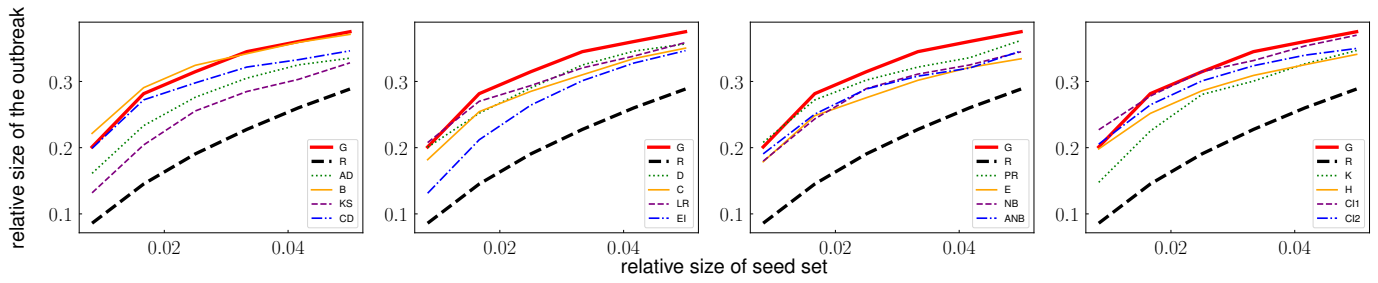

Figure 405: Bay Dry -  $p=1.0p_c$

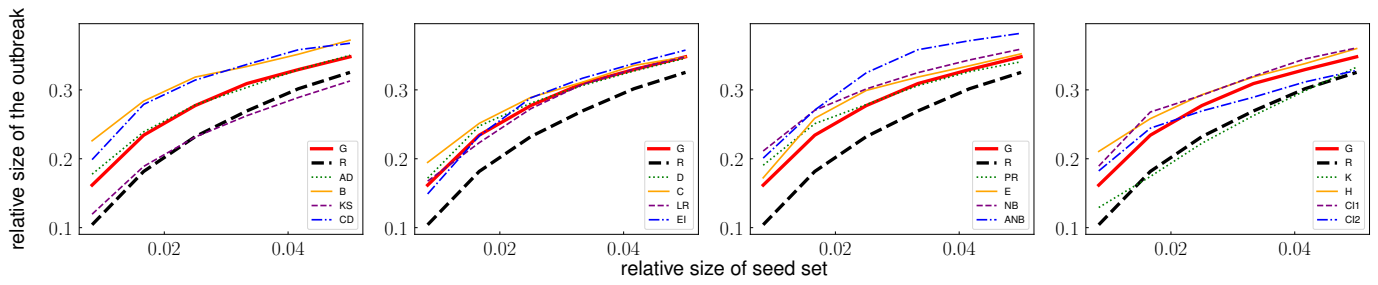

Figure 406: Bay Wet -  $p=1.0p_c$



Figure 407: Radoslaw Email -  $p=1.0p_c$



Figure 408: High school, 2012 -  $p=1.0p_c$



Figure 409: Little Rock Lake -  $p=1.0p_c$

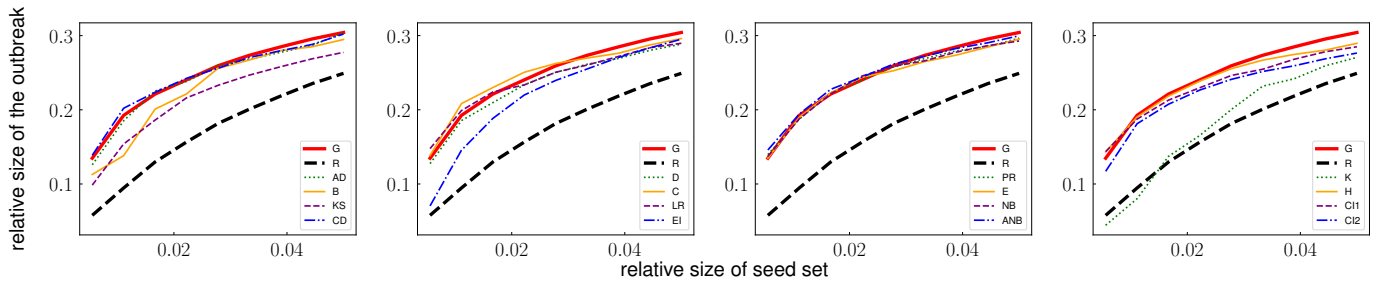

Figure 410: Jazz -  $p=1.0p_c$

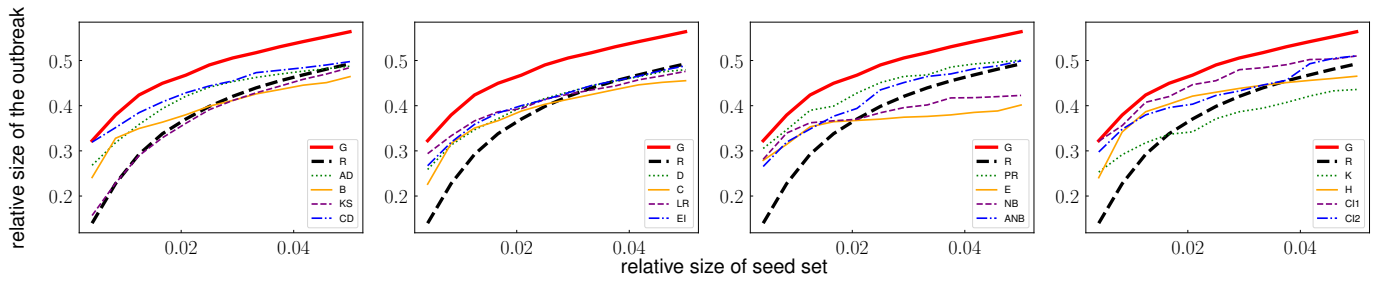

Figure 411: S420 -  $p=1.0p_c$

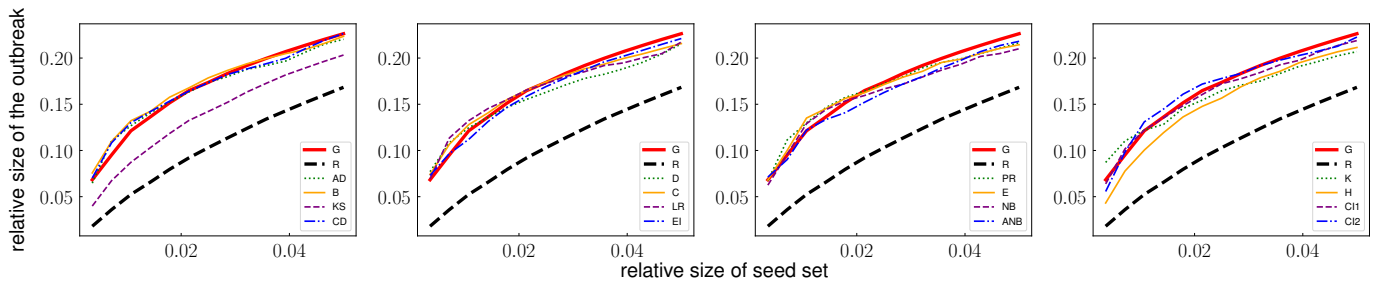

Figure 412: C. Elegans, neural -  $p=1.0p_c$



Figure 413: Network Science -  $p=1.0p_c$



Figure 414: Dublin -  $p=1.0p_c$

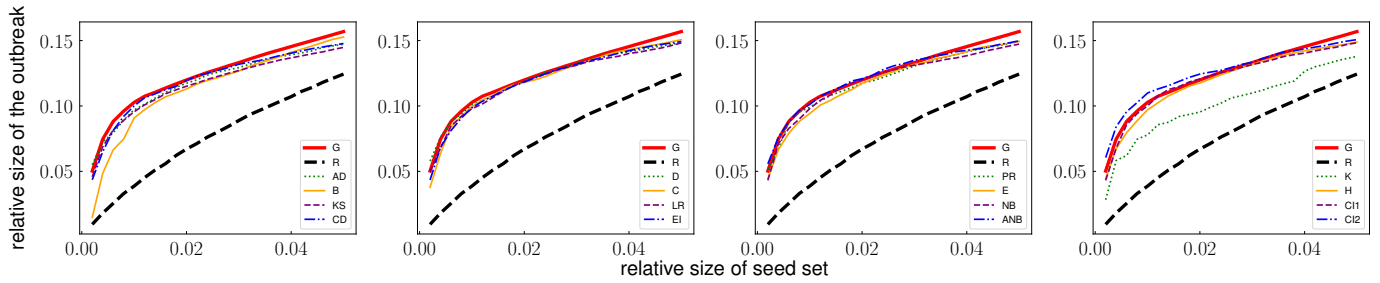

Figure 415: US Air Transportation -  $p=1.0p_c$



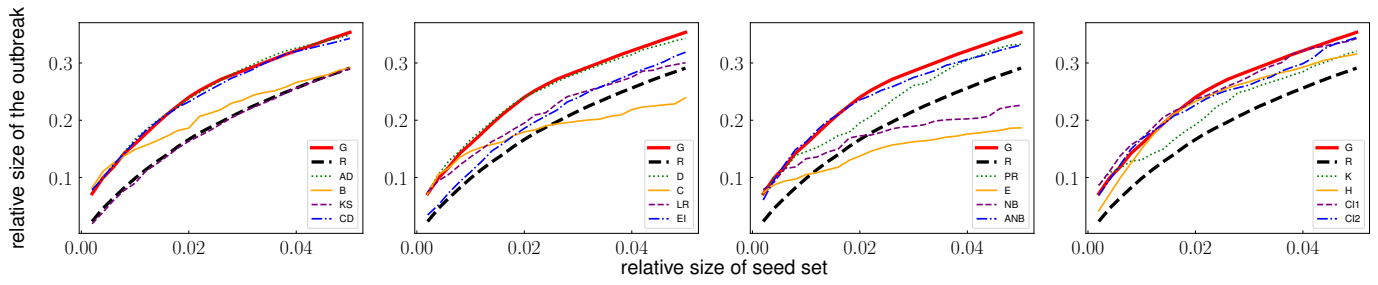

Figure 416: S838 -  $p=1.0p_c$

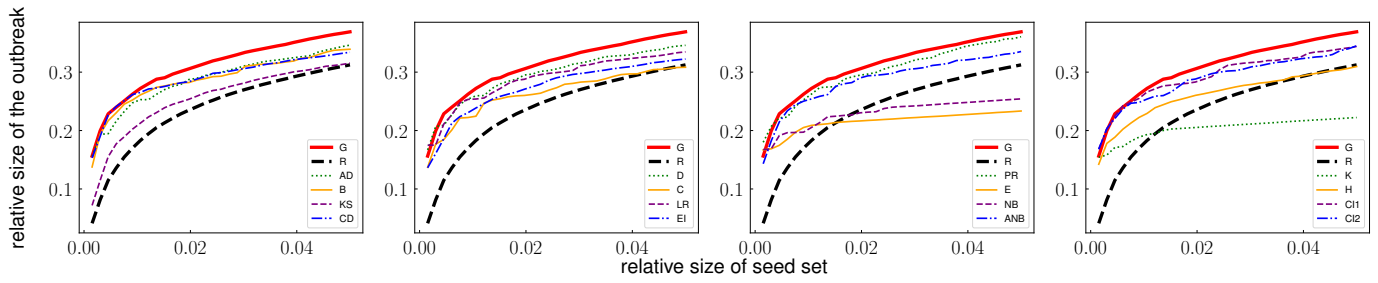

Figure 417: Yeast, transcription -  $p=1.0p_c$

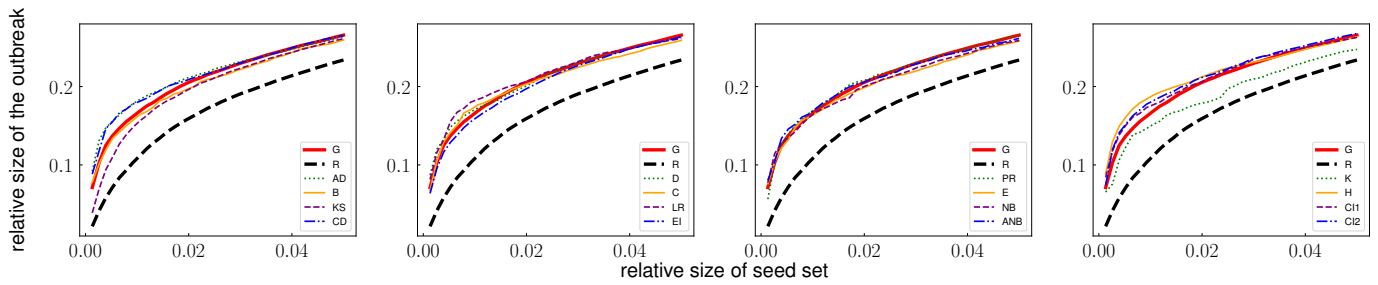

Figure 418: Caltech -  $p=1.0p_c$



Figure 419: Reed -  $p=1.0p_c$



Figure 420: Mouse retina -  $p=1.0p_c$



Figure 421: URV email -  $p=1.0p_c$

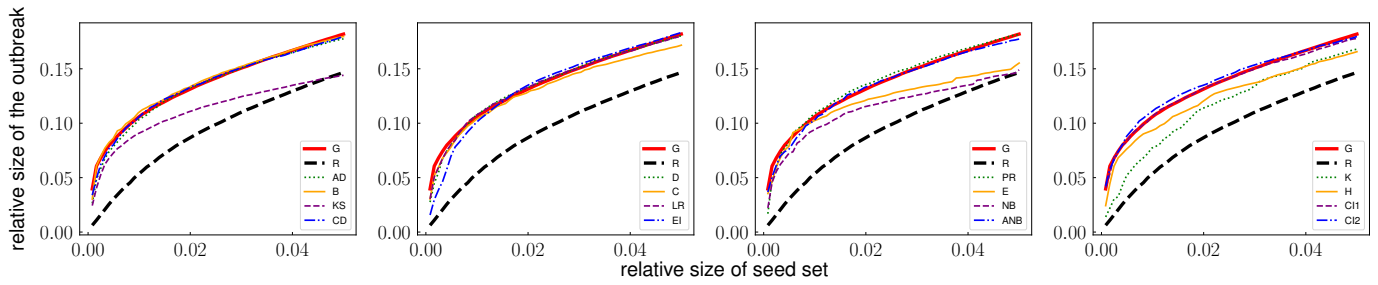

Figure 422: Political blogs -  $p=1.0p_c$

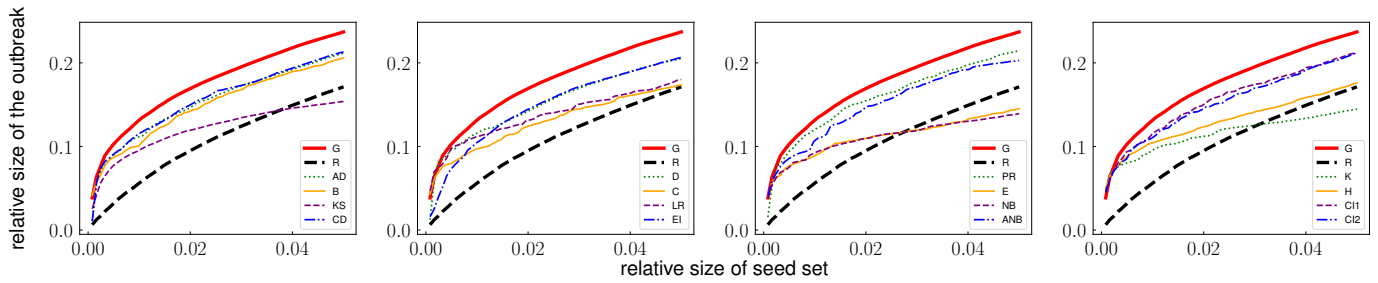

Figure 423: Air traffic -  $p=1.0p_c$

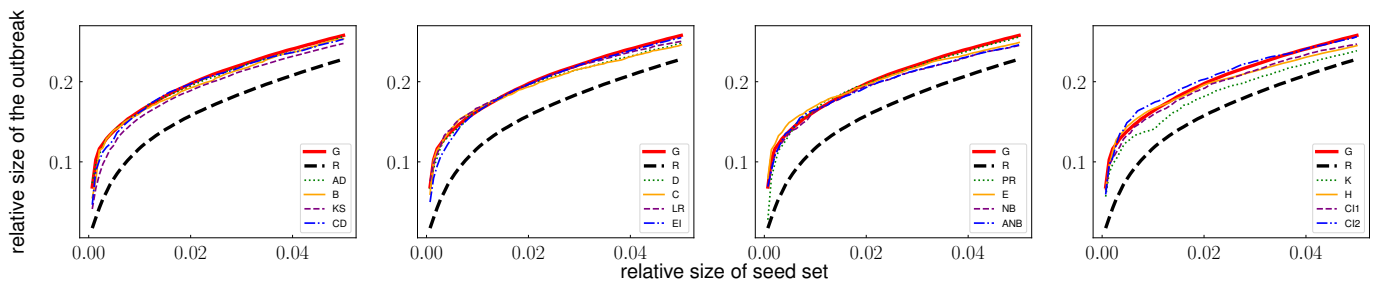

Figure 424: Haverford -  $p=1.0p_c$



Figure 425: Simmons -  $p=1.0p_c$



Figure 426: Swarthmore -  $p=1.0p_c$

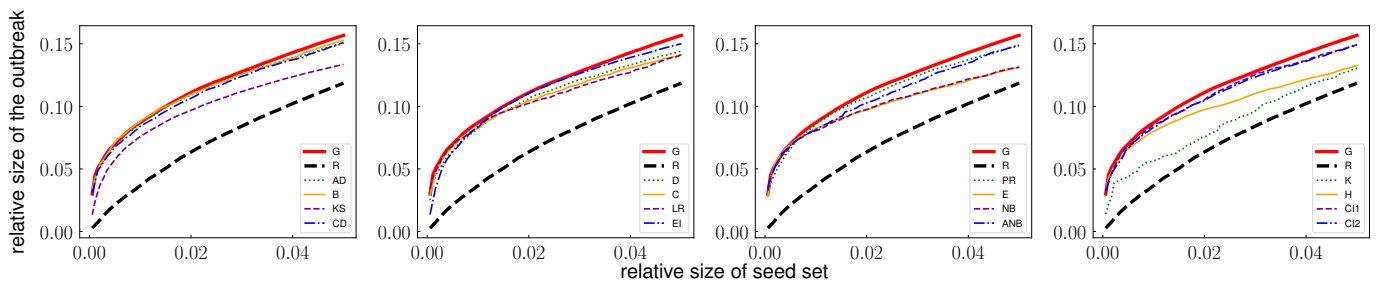

Figure 427: Petster, hamster -  $p=1.0p_c$



Figure 428: UC Irvine -  $p=1.0p_c$



Figure 429: Yeast, protein -  $p=1.0p_c$

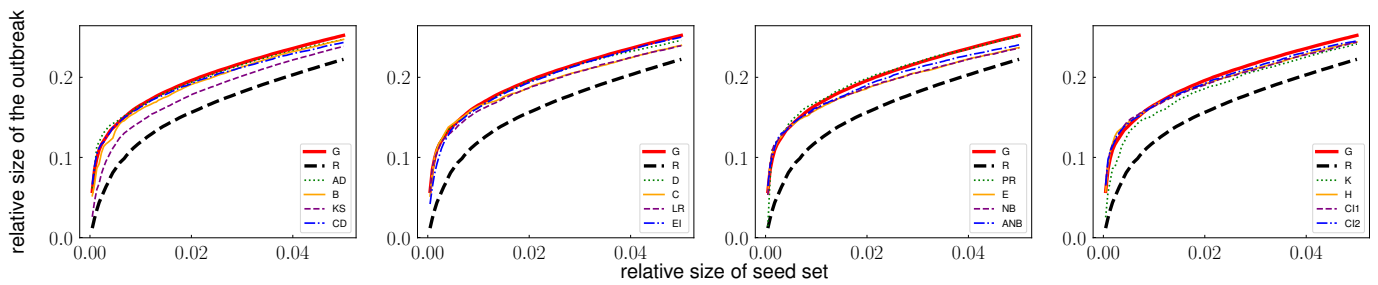

Figure 430: Amherst -  $p=1.0p_c$



Figure 431: Bowdoin -  $p=1.0p_c$



Figure 432: Hamilton -  $p=1.0p_c$



Figure 433: Adolescent health -  $p=1.0p_c$

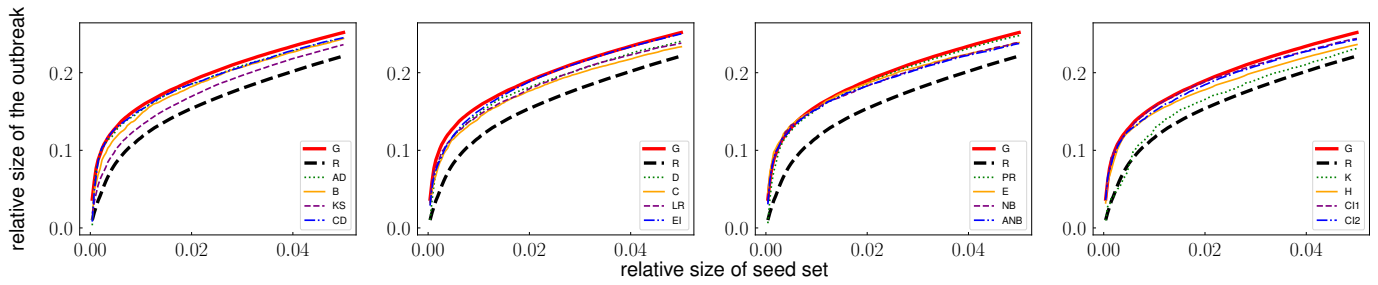

Figure 434: Trinity -  $p=1.0p_c$

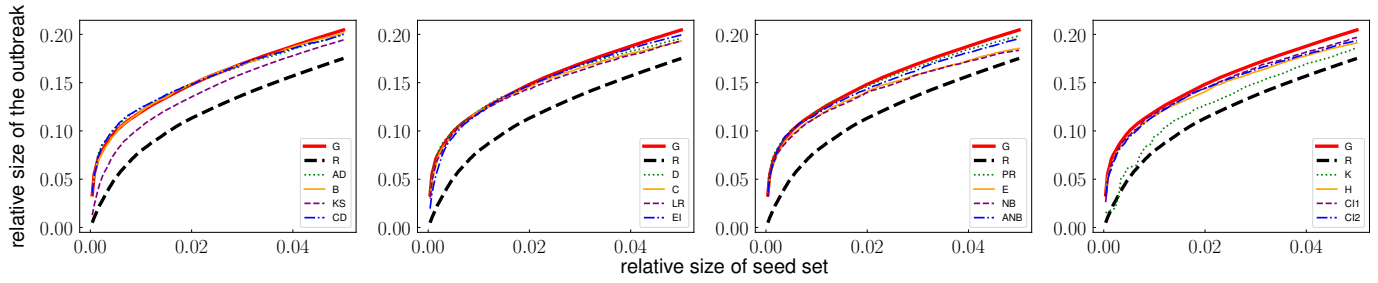

Figure 435: USFCA -  $p=1.0p_c$

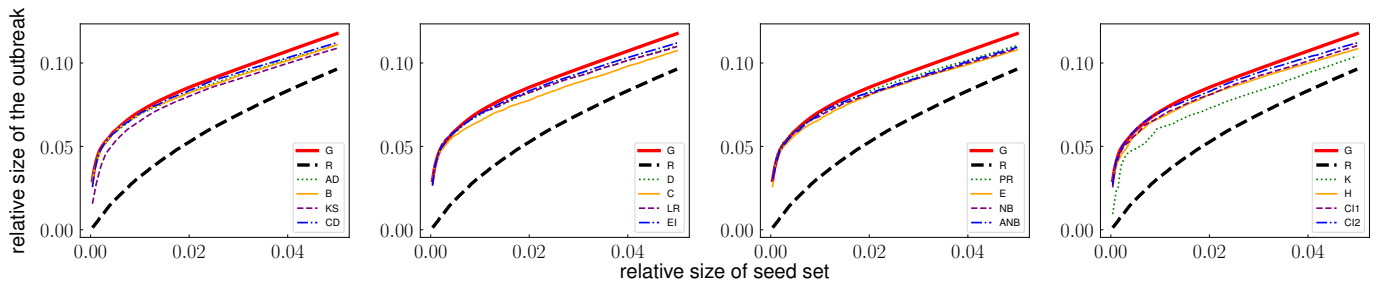

Figure 436: Japanese -  $p=1.0p_c$

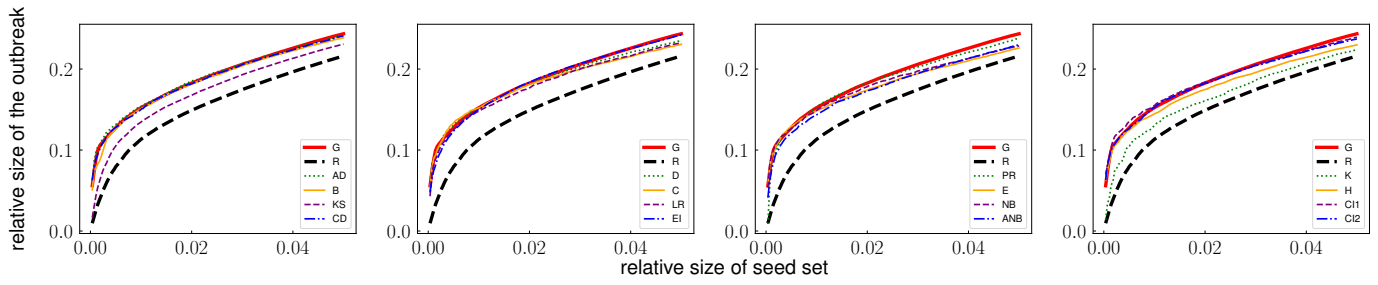

Figure 437: Williams -  $p=1.0p_c$

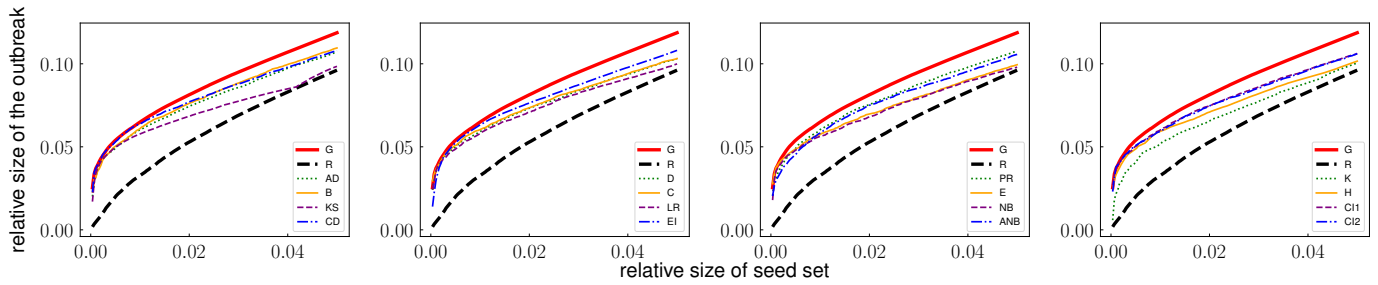

Figure 438: Open flights -  $p=1.0p_c$

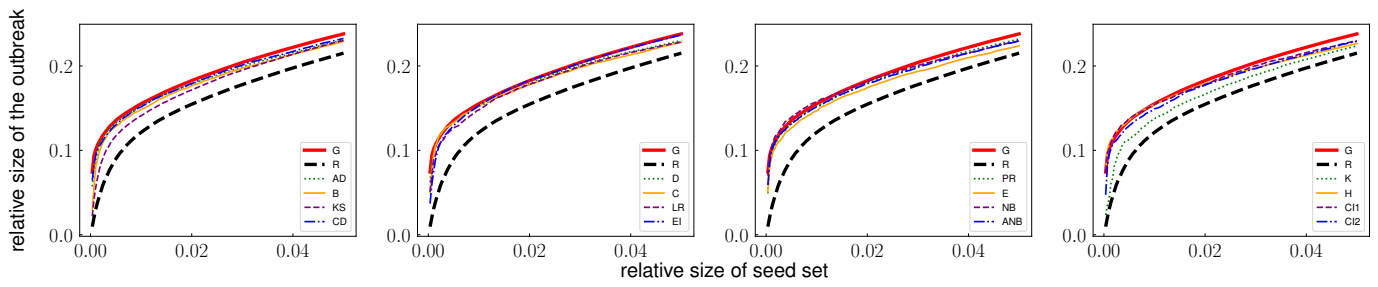

Figure 439: Oberlin -  $p=1.0p_c$





Figure 440: Smith -  $p=1.0p_c$



Figure 441: Wellesley -  $p=1.0p_c$

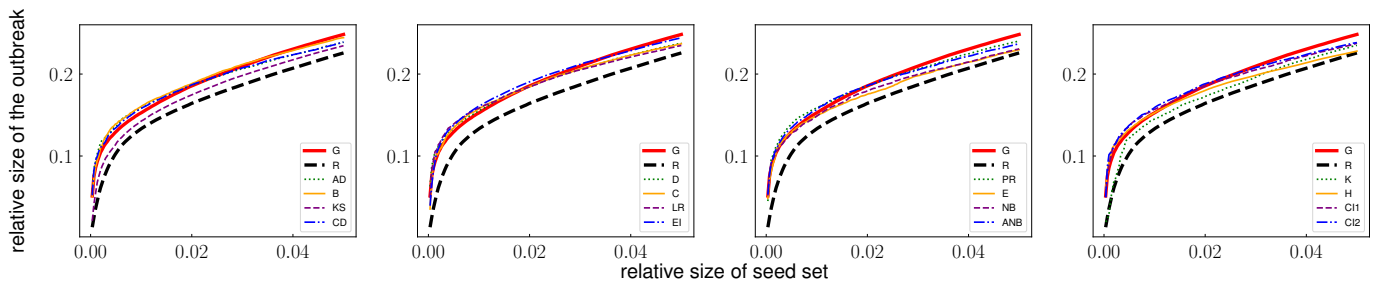

Figure 442: Vassar -  $p=1.0p_c$

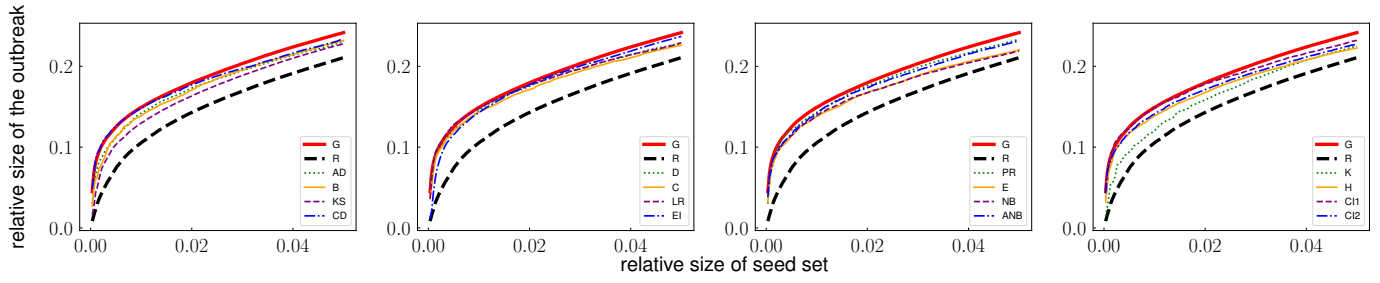

Figure 443: Middlebury -  $p=1.0p_c$



Figure 444: Pepperdine -  $p=1.0p_c$

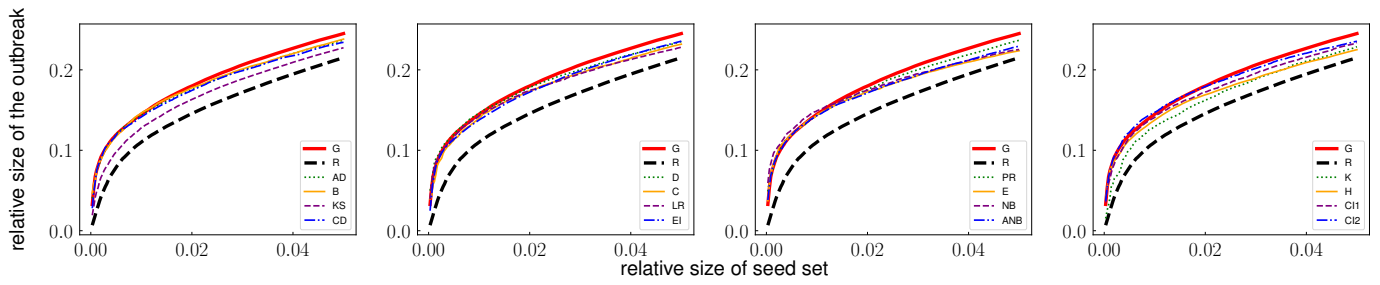

Figure 445: Colgate -  $p=1.0p_c$



Figure 446: Santa -  $p=1.0p_c$

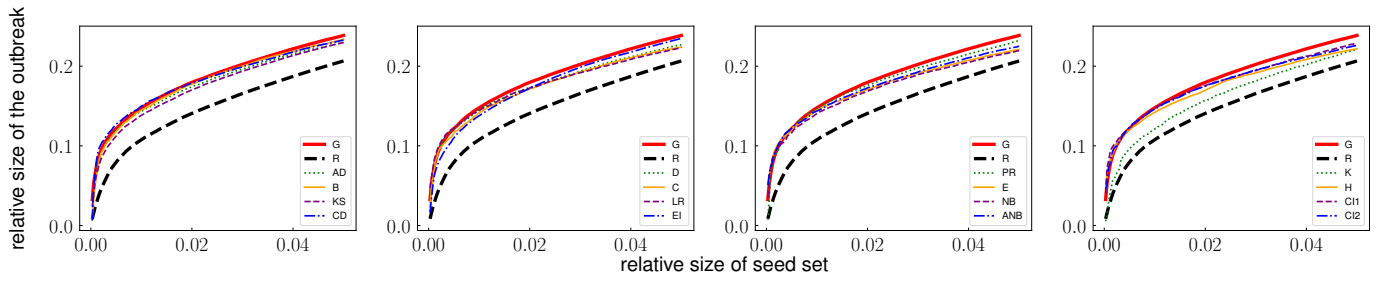

Figure 447: Wesleyan -  $p=1.0p_c$

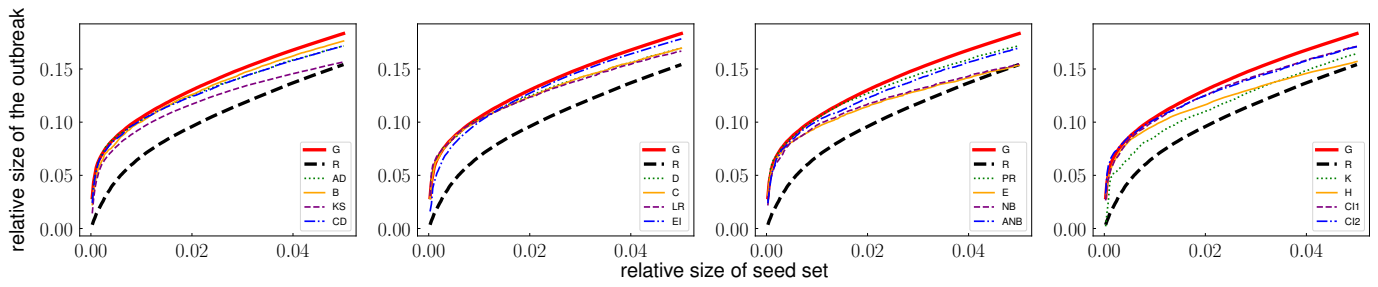

Figure 448: Mich -  $p=1.0p_c$



Figure 449: Bitcoin Alpha -  $p=1.0p_c$



Figure 450: Bucknell -  $p=1.0p_c$



Figure 451: Brandeis -  $p=1.0p_c$



Figure 452: Howard -  $p=1.0p_c$



Figure 453: Rice -  $p=1.0p_c$

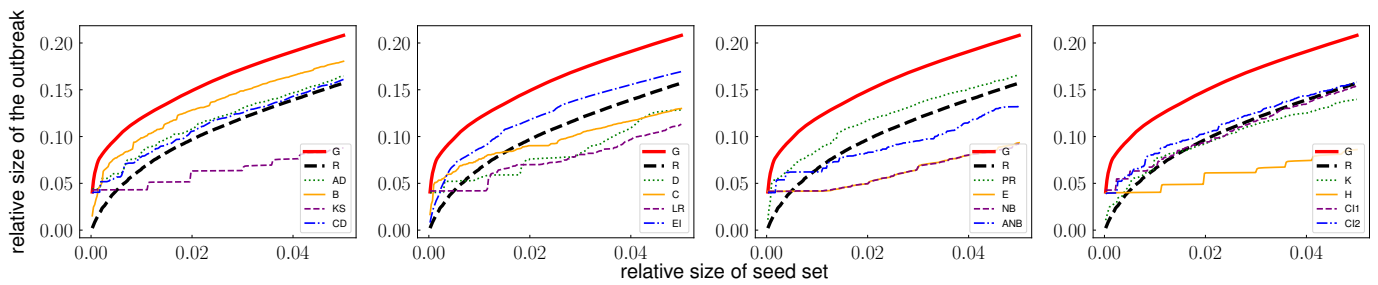

Figure 454: GR-QC, 1993-2003 -  $p=1.0p_c$



Figure 455: Tennis -  $p=1.0p_c$



Figure 456: Rochester -  $p=1.0p_c$



Figure 457: US Power grid -  $p=1.0p_c$



Figure 458: Lehigh -  $p=1.0p_c$



Figure 459: Johns Hopkins -  $p=1.0p_c$



Figure 460: HT09 -  $p=1.0p_c$

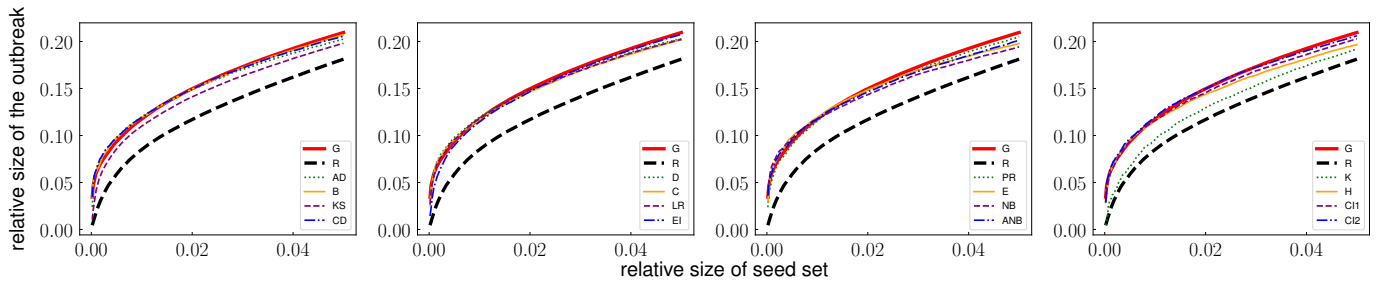

Figure 461: Wake -  $p=1.0p_c$

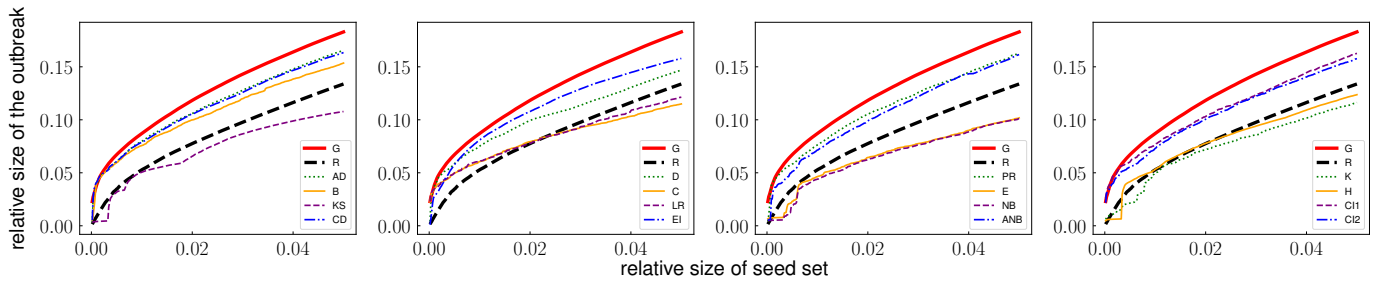

Figure 462: Hep-Th, 1995-1999 -  $p=1.0p_c$

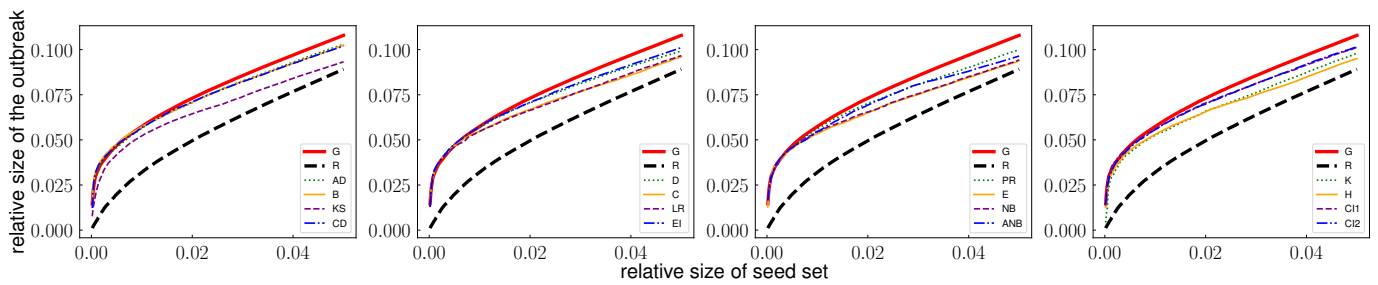

Figure 463: Bitcoin OTC -  $p=1.0p_c$





Figure 464: Reactome -  $p=1.0p_c$



Figure 465: Jung -  $p=1.0p_c$



Figure 466: Gnutella, Aug. 8, 2002 -  $p=1.0p_c$

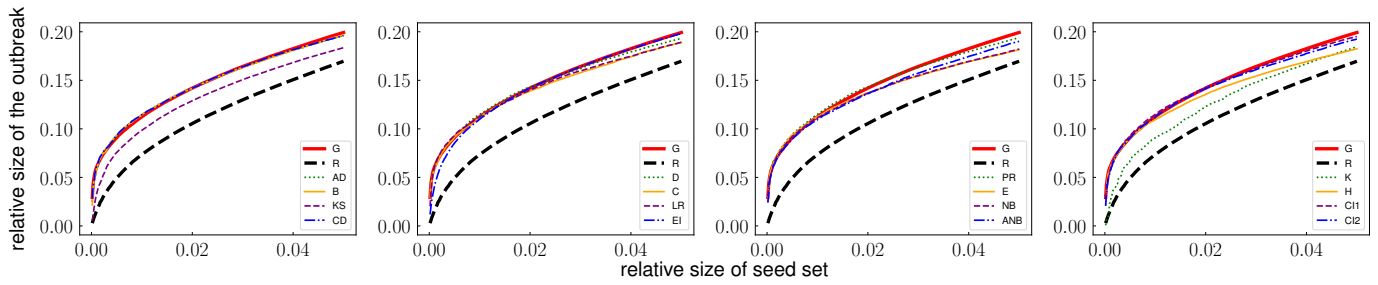

Figure 467: American -  $p=1.0p_c$

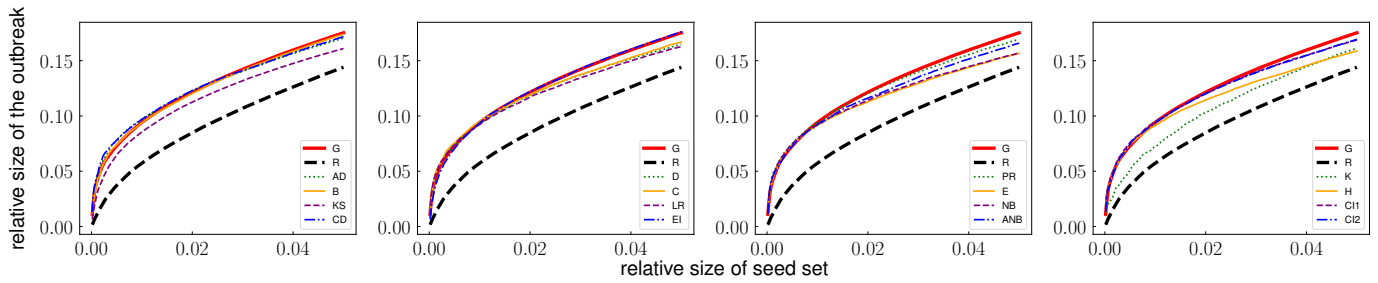

Figure 468: MIT -  $p=1.0p_c$

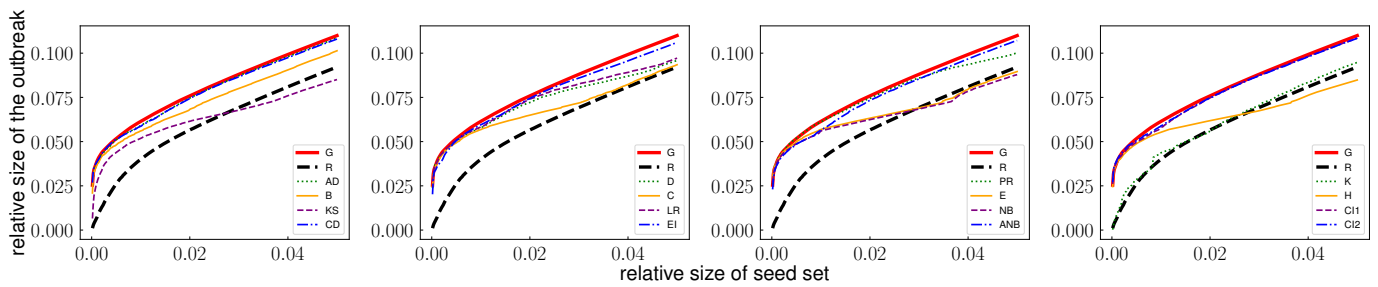

Figure 469: JDK -  $p=1.0p_c$

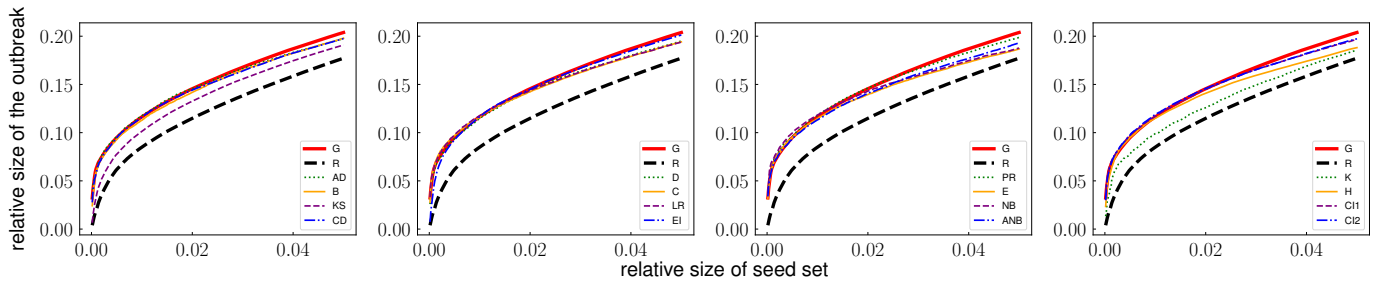

Figure 470: William -  $p=1.0p_c$

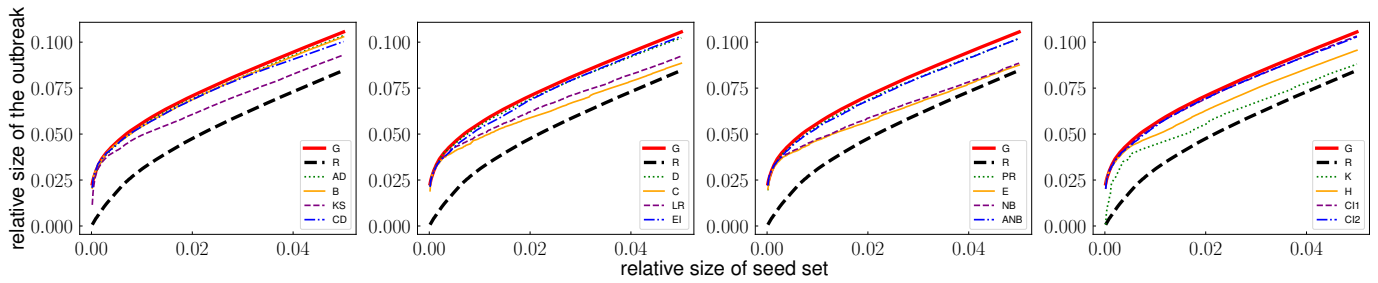

Figure 471: AS Oregon -  $p=1.0p_c$

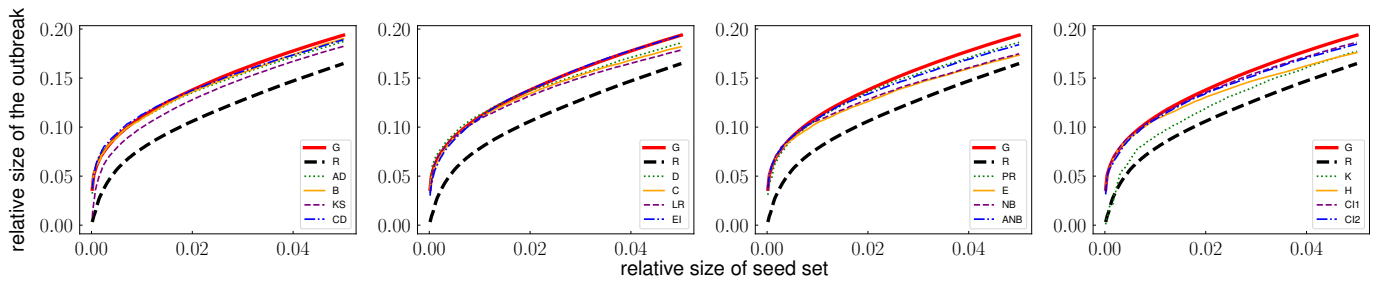

Figure 472: UChicago -  $p=1.0p_c$



Figure 473: Princeton -  $p=1.0p_c$

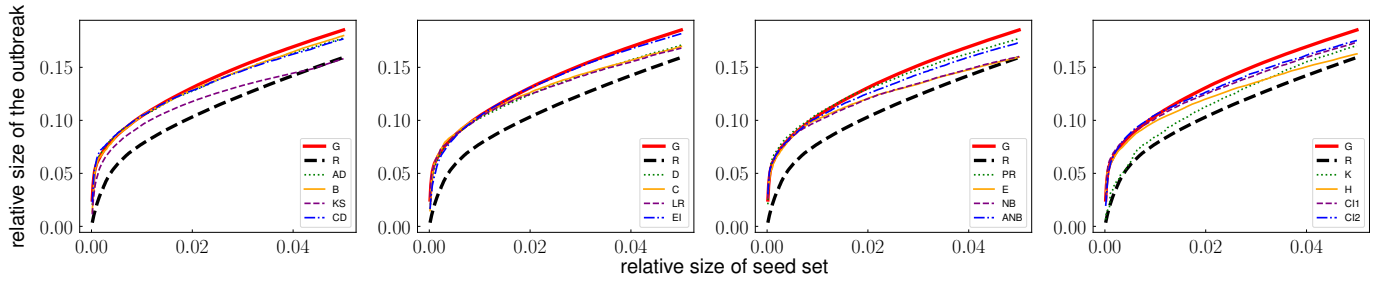

Figure 474: Carnegie -  $p=1.0p_c$



Figure 475: Tufts -  $p=1.0p_c$

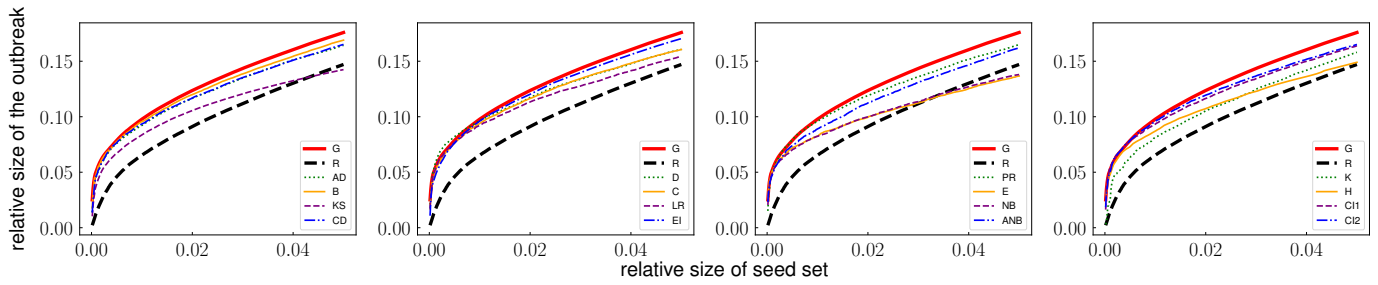

Figure 476: UC -  $p=1.0p_c$

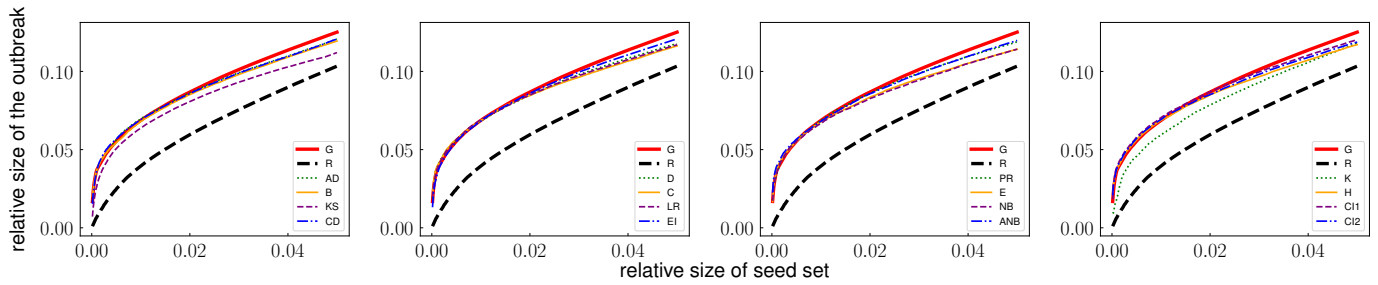

Figure 477: Wikipedia elections -  $p=1.0p_c$

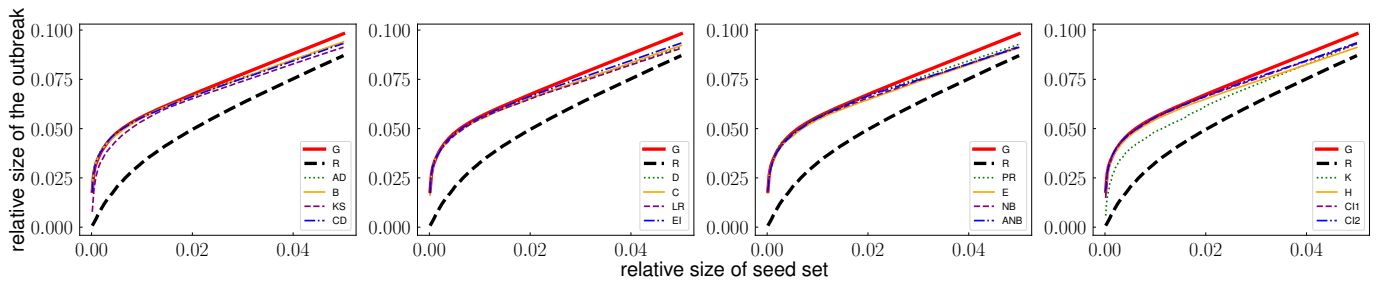

Figure 478: English -  $p=1.0p_c$



Figure 479: Gnutella, Aug. 9, 2002 -  $p=1.0p_c$



Figure 480: French -  $p=1.0p_c$

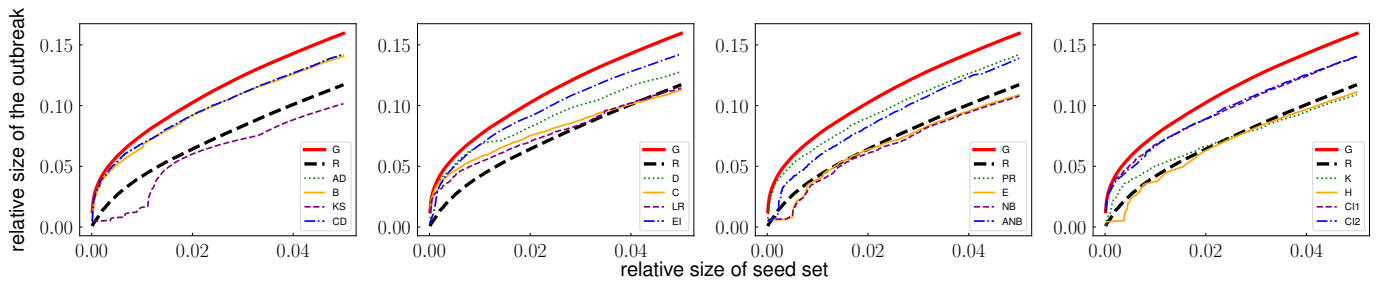

Figure 481: Hep-Th, 1993-2003 -  $p=1.0p_c$

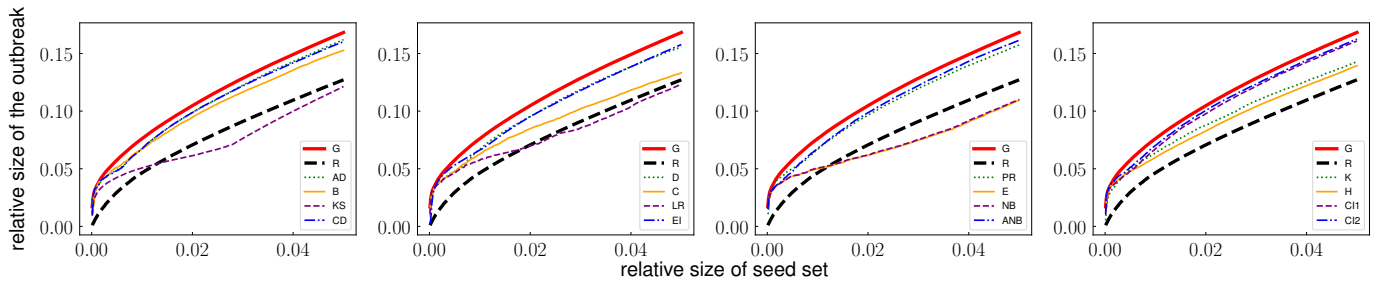

Figure 482: Gnutella, Aug. 6, 2002 -  $p=1.0p_c$

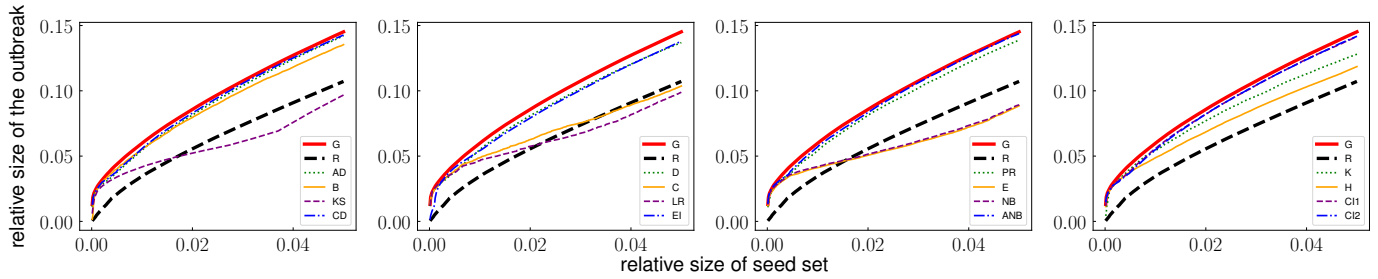

Figure 483: Gnutella, Aug. 5, 2002 -  $p=1.0p_c$

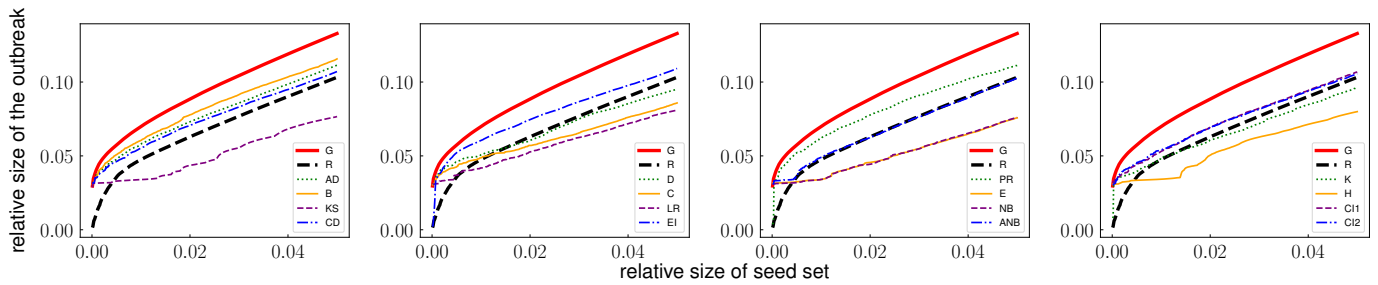

Figure 484: PGP -  $p=1.0p_c$

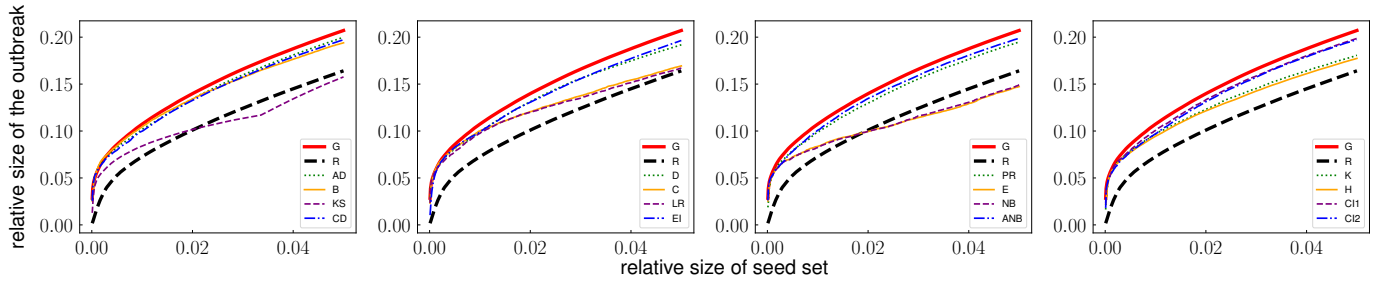

Figure 485: Gnutella, Aug. 4, 2002 -  $p=1.0p_c$

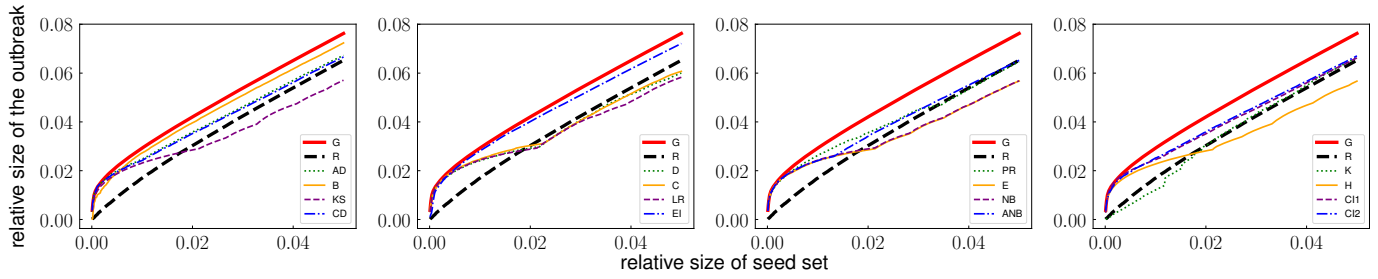

Figure 486: Hep-Ph, 1993-2003 -  $p=1.0p_c$

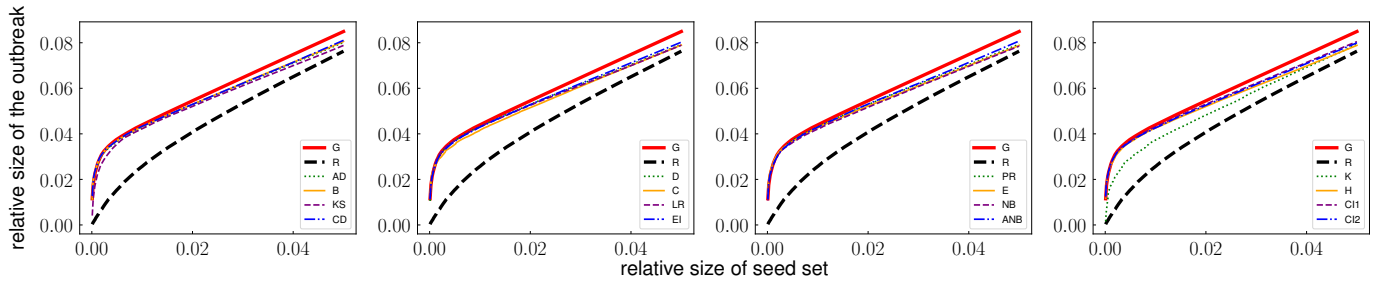

Figure 487: Spanish 1 -  $p=1.0p_c$





Figure 488: DBLP, citations -  $p=1.0p_c$



Figure 489: Spanish 2 -  $p=1.0p_c$



Figure 490: Cond-Mat, 1995-1999 -  $p=1.0p_c$



Figure 491: Astrophysics -  $p=1.0p_c$



Figure 492: AstroPhys, 1993-2003 -  $p=1.0p_c$



Figure 493: Marvel -  $p=1.0p_c$



Figure 494: Cond-Mat, 1993-2003 -  $p=1.0p_c$



Figure 495: Gnutella, Aug. 25, 2002 -  $p=1.0p_c$



Figure 496: Internet -  $p=1.0p_c$

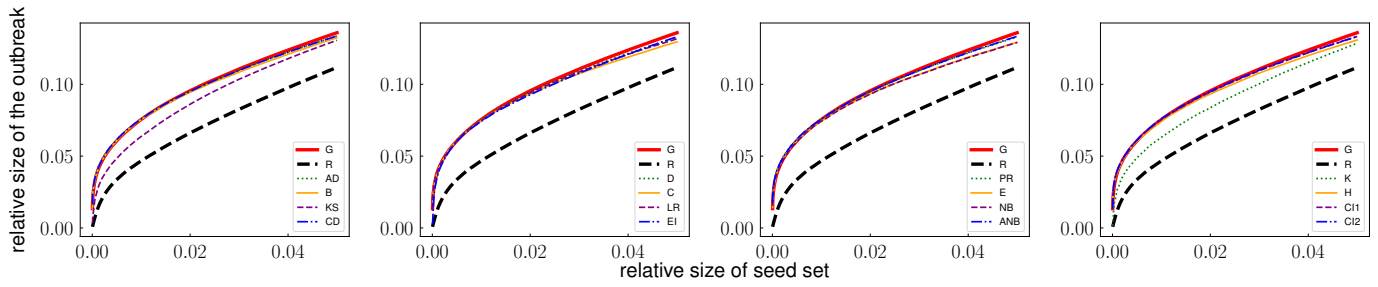

Figure 497: Thesaurus -  $p=1.0p_c$

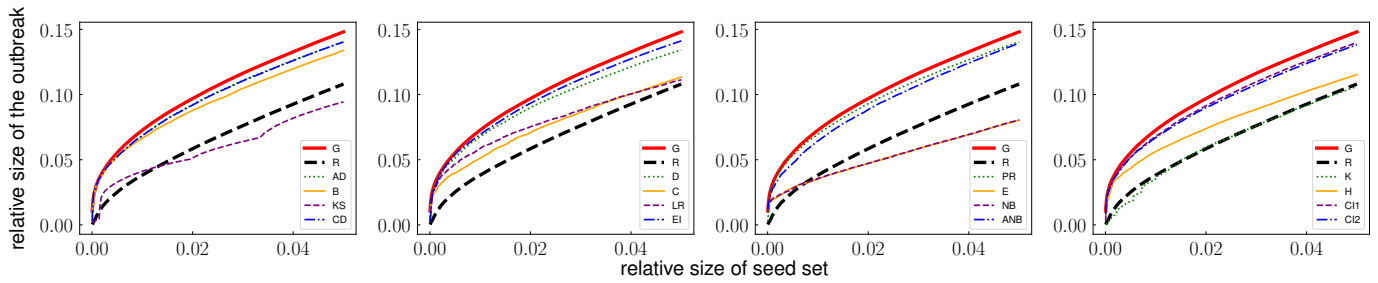

Figure 498: Cora -  $p=1.0p_c$

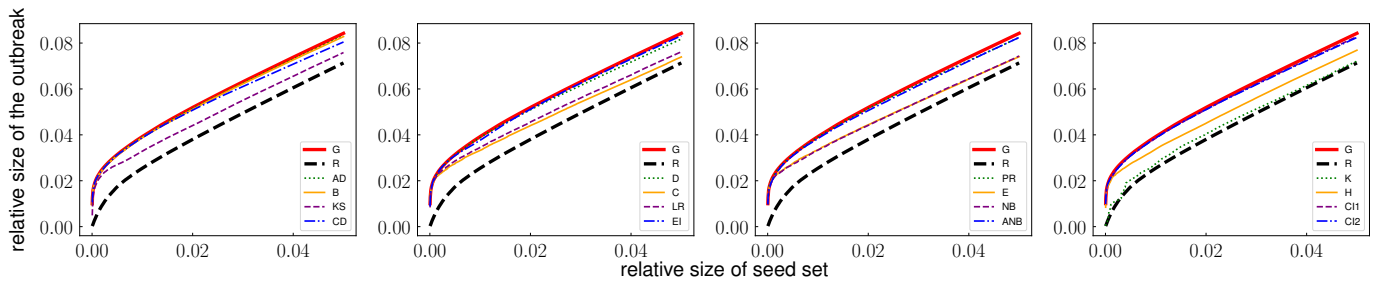

Figure 499: AS Caida -  $p=1.0p_c$



Figure 500: Gnutella, Aug. 24, 2002 -  $p=1.0p_c$

### 3.1.3 Supercritical Regime

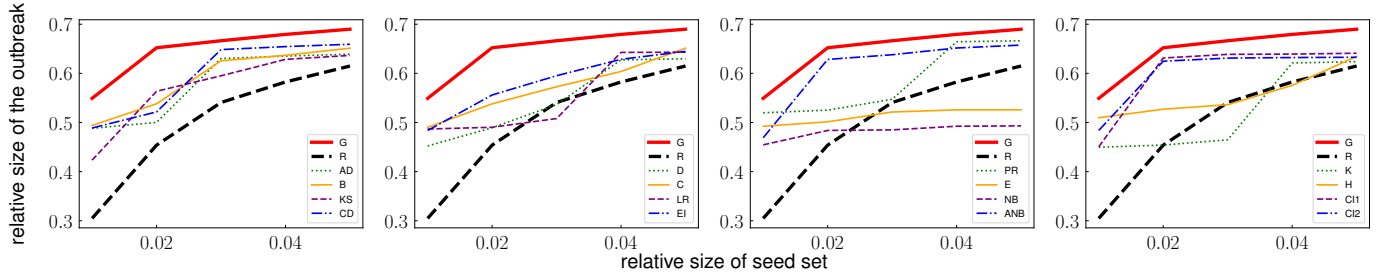

Figure 501: Political books -  $p=2.0p_c$

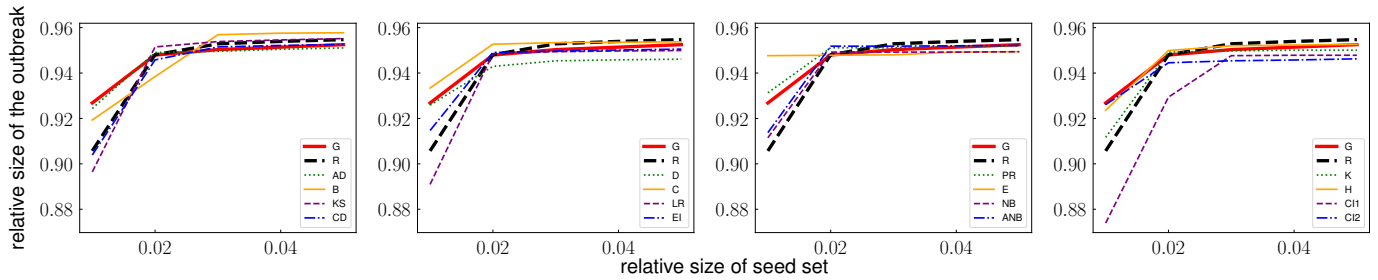

Figure 502: College football -  $p=2.0p_c$

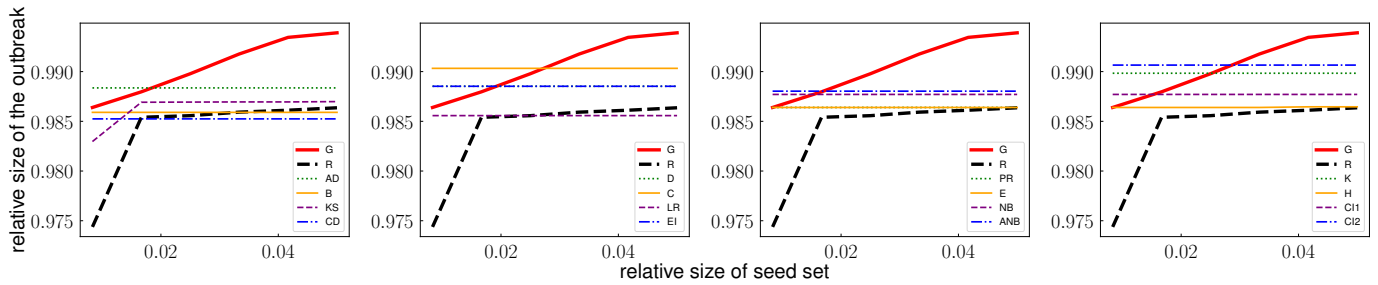

Figure 503: S208 -  $p=2.0p_c$



Figure 504: High school, 2011 -  $p=2.0p_c$



Figure 505: Bay Dry -  $p=2.0p_c$



Figure 506: Bay Wet -  $p=2.0p_c$



Figure 507: Radoslaw Email -  $p=2.0p_c$



Figure 508: High school, 2012 -  $p=2.0p_c$



Figure 509: Little Rock Lake -  $p=2.0p_c$





Figure 510: Jazz -  $p=2.0p_c$

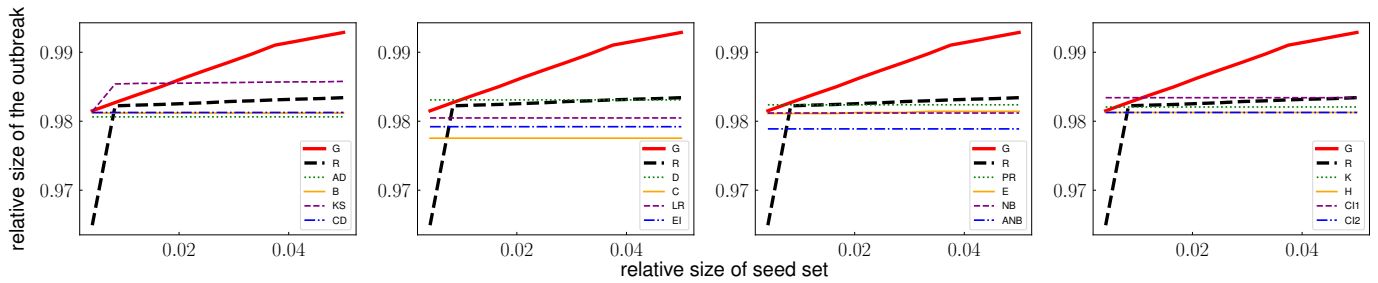

Figure 511: S420 -  $p=2.0p_c$

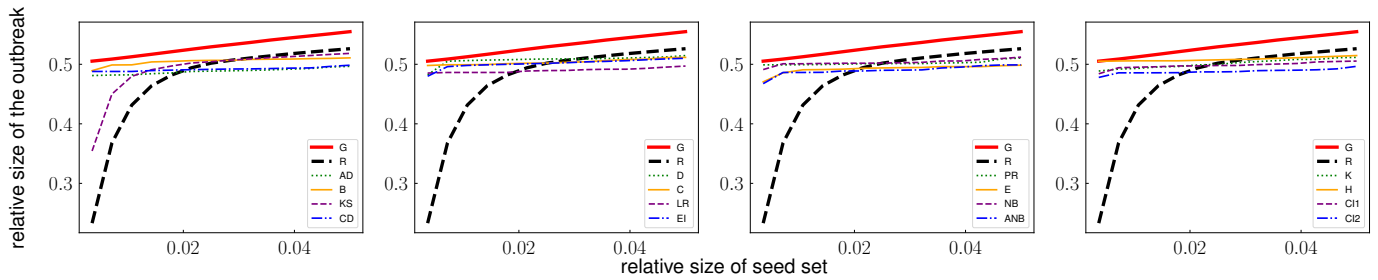

Figure 512: C. Elegans, neural -  $p=2.0p_c$

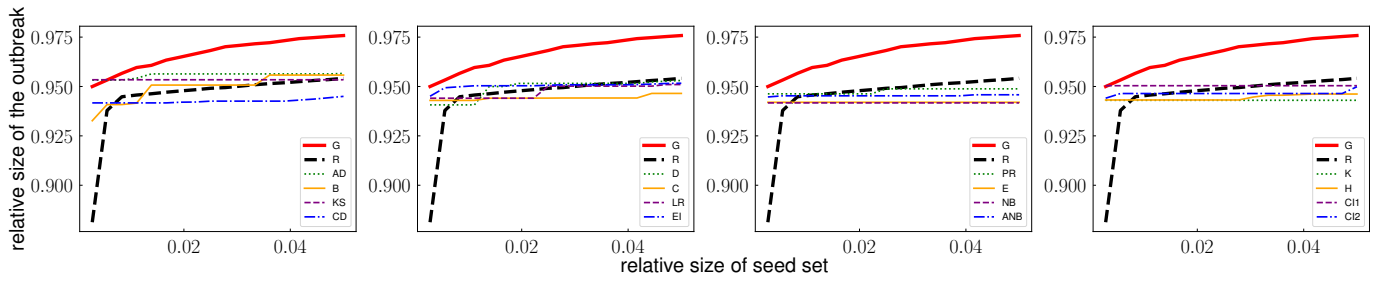

Figure 513: Network Science -  $p=2.0p_c$

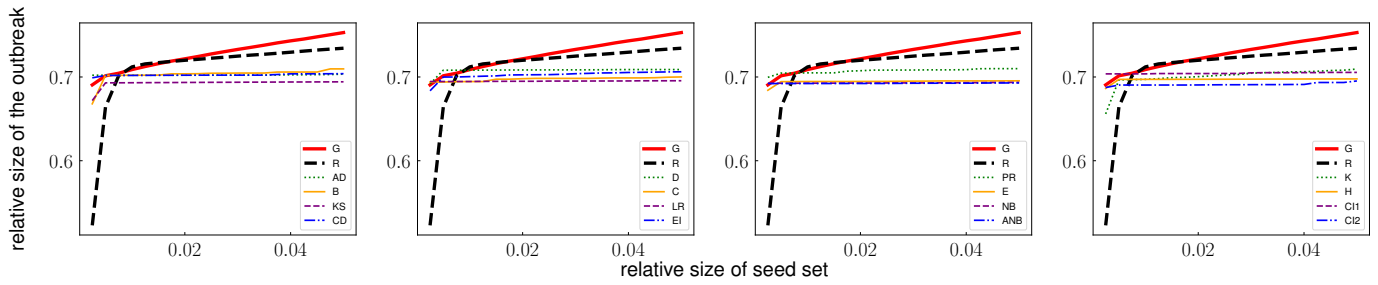

Figure 514: Dublin -  $p=2.0p_c$

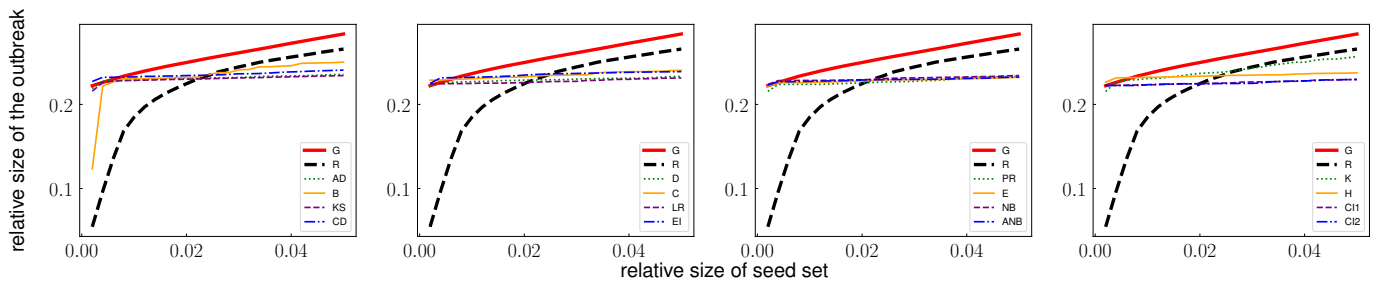

Figure 515: US Air Transportation -  $p=2.0p_c$



Figure 516: S838 -  $p=2.0p_c$



Figure 517: Yeast, transcription -  $p=2.0p_c$



Figure 518: Caltech -  $p=2.0p_c$

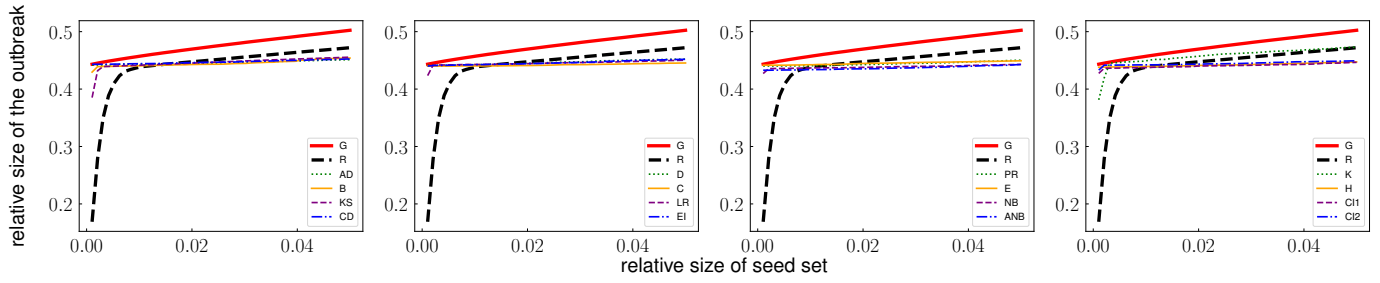

Figure 519: Reed -  $p=2.0p_c$

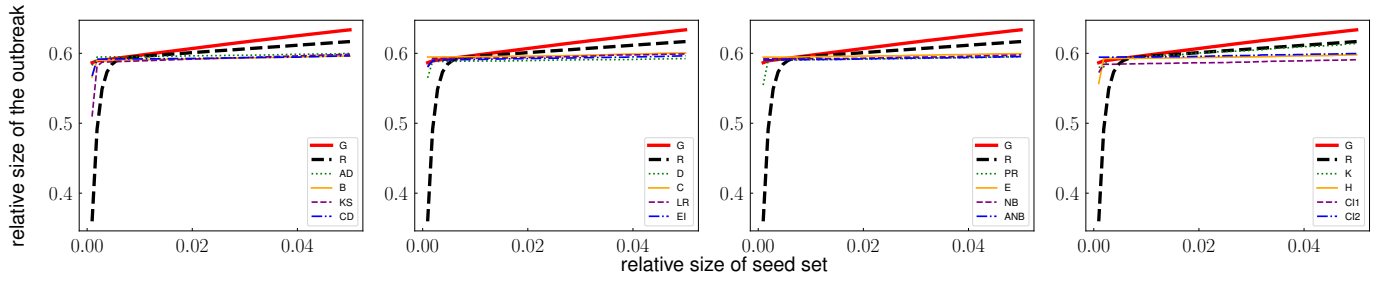

Figure 520: Mouse retina -  $p=2.0p_c$

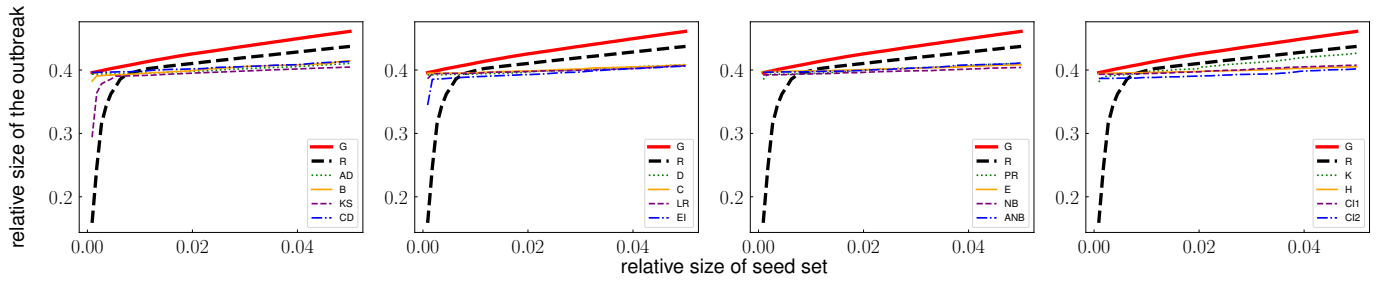

Figure 521: URV email -  $p=2.0p_c$

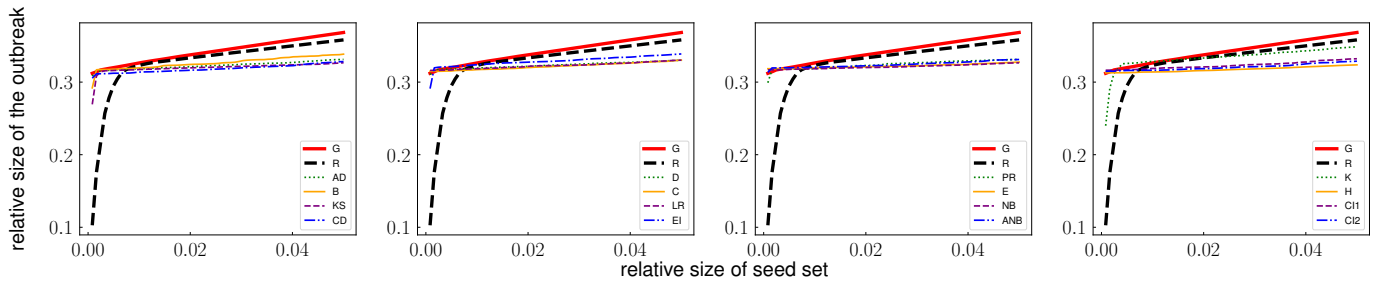

Figure 522: Political blogs -  $p=2.0p_c$

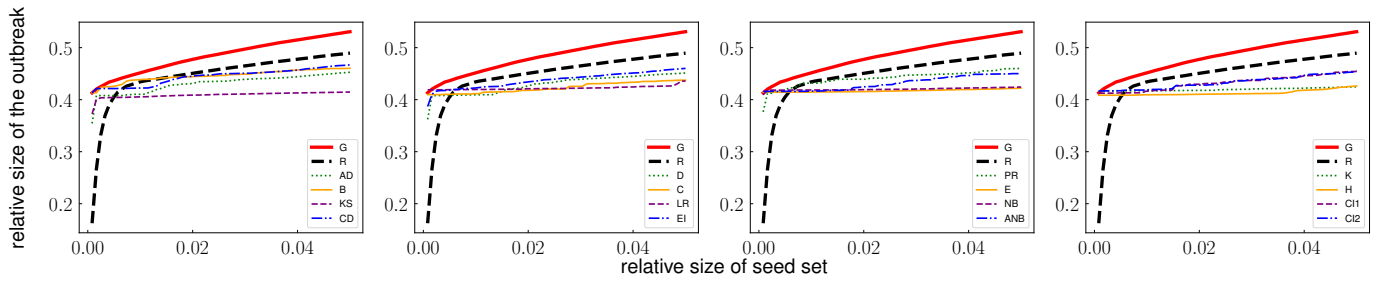

Figure 523: Air traffic -  $p=2.0p_c$

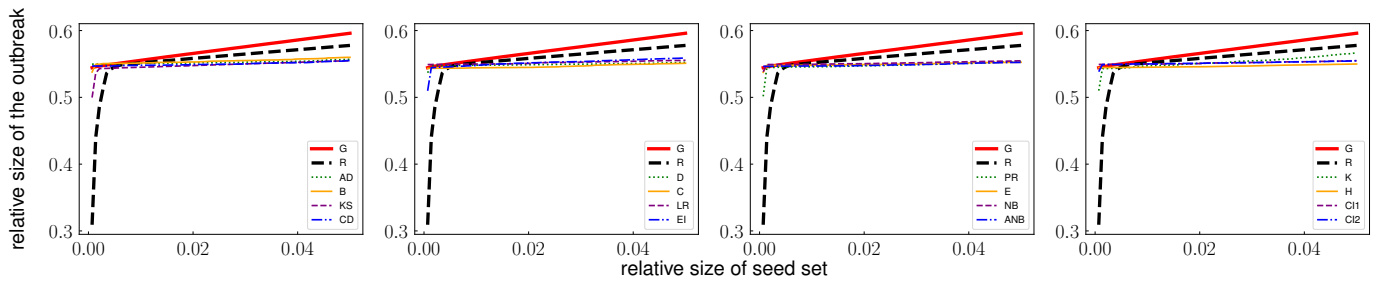

Figure 524: Haverford -  $p=2.0p_c$



Figure 525: Simmons -  $p=2.0p_c$



Figure 526: Swarthmore -  $p=2.0p_c$



Figure 527: Petster, hamster -  $p=2.0p_c$

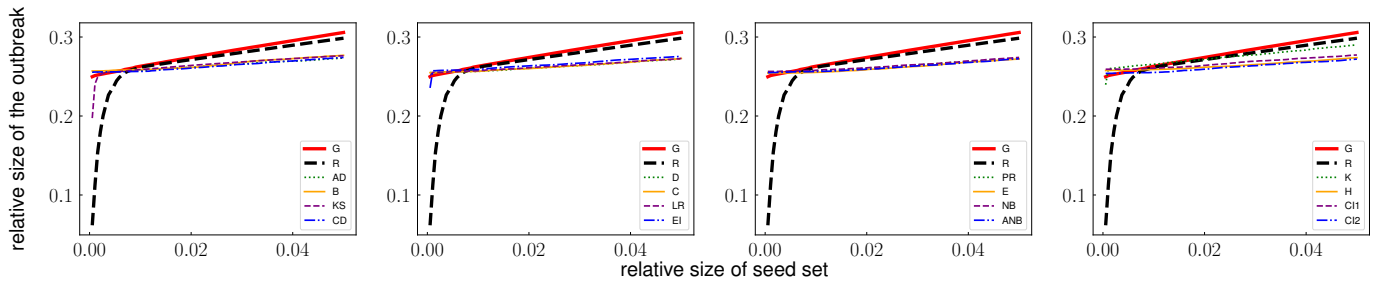

Figure 528: UC Irvine -  $p=2.0p_c$

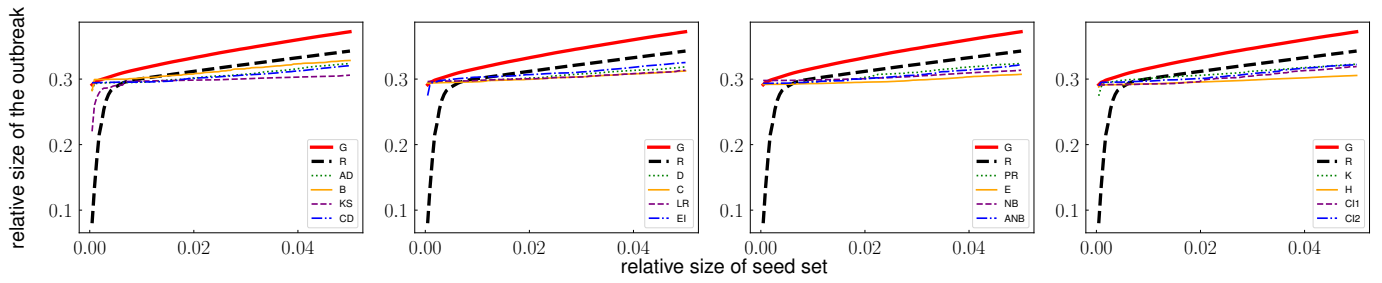

Figure 529: Yeast, protein -  $p=2.0p_c$

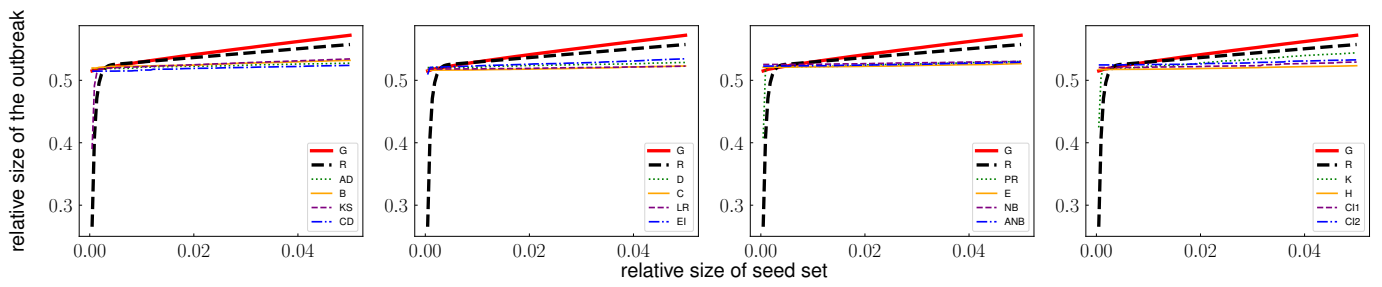

Figure 530: Amherst -  $p=2.0p_c$



Figure 531: Bowdoin -  $p=2.0p_c$



Figure 532: Hamilton -  $p=2.0p_c$



Figure 533: Adolescent health -  $p=2.0p_c$



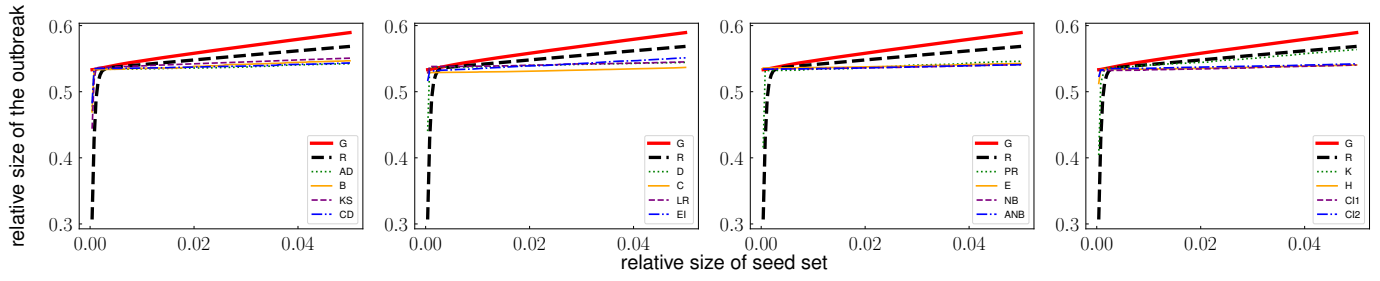

Figure 534: Trinity -  $p=2.0p_c$

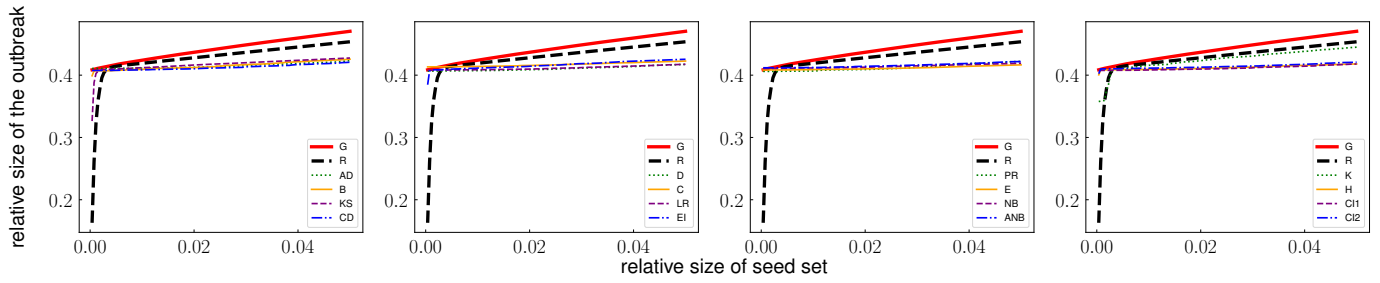

Figure 535: USFCA -  $p=2.0p_c$

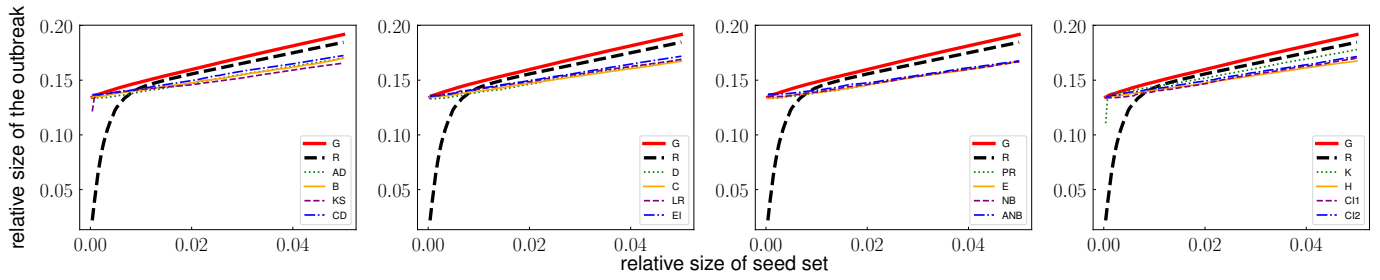

Figure 536: Japanese -  $p=2.0p_c$



Figure 537: Williams -  $p=2.0p_c$



Figure 538: Open flights -  $p=2.0p_c$

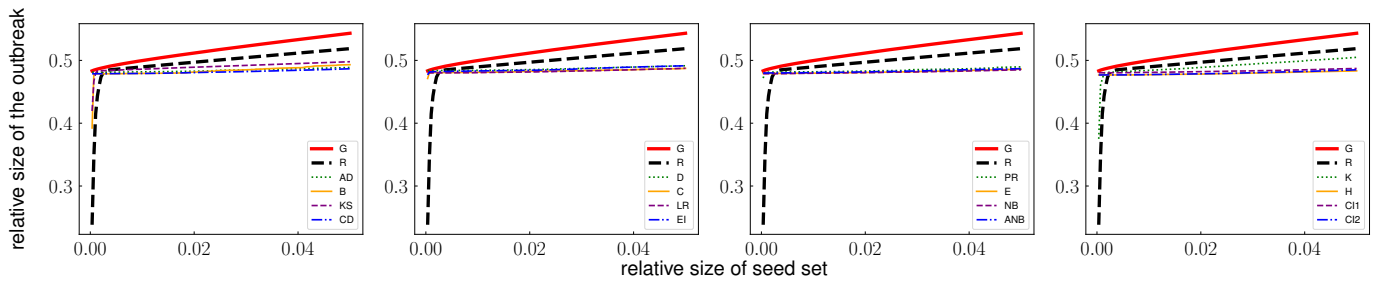

Figure 539: Oberlin -  $p=2.0p_c$



Figure 540: Smith -  $p=2.0p_c$



Figure 541: Wellesley -  $p=2.0p_c$



Figure 542: Vassar -  $p=2.0p_c$



Figure 543: Middlebury -  $p=2.0p_c$



Figure 544: Pepperdine -  $p=2.0p_c$



Figure 545: Colgate -  $p=2.0p_c$



Figure 546: Santa -  $p=2.0p_c$



Figure 547: Wesleyan -  $p=2.0p_c$



Figure 548: Mich -  $p=2.0p_c$

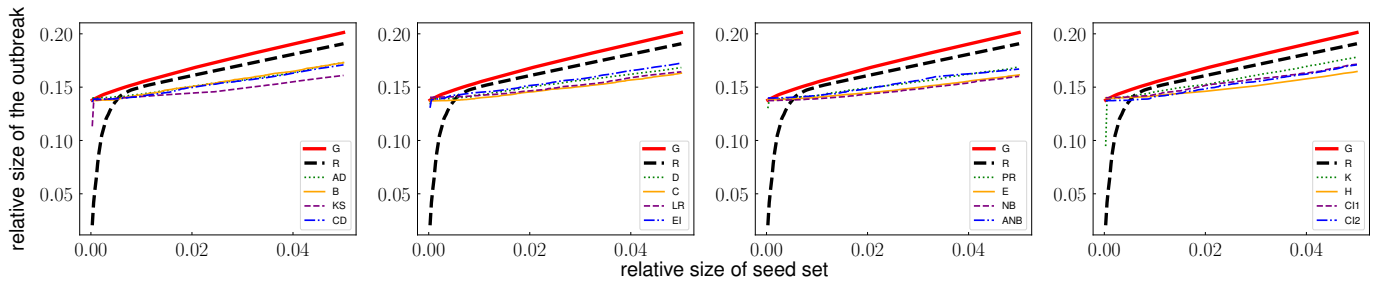

Figure 549: Bitcoin Alpha -  $p=2.0p_c$

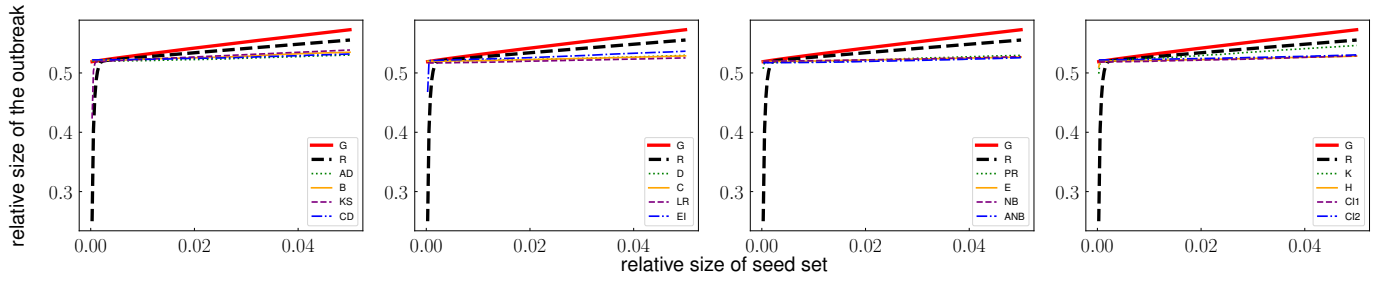

Figure 550: Bucknell -  $p=2.0p_c$

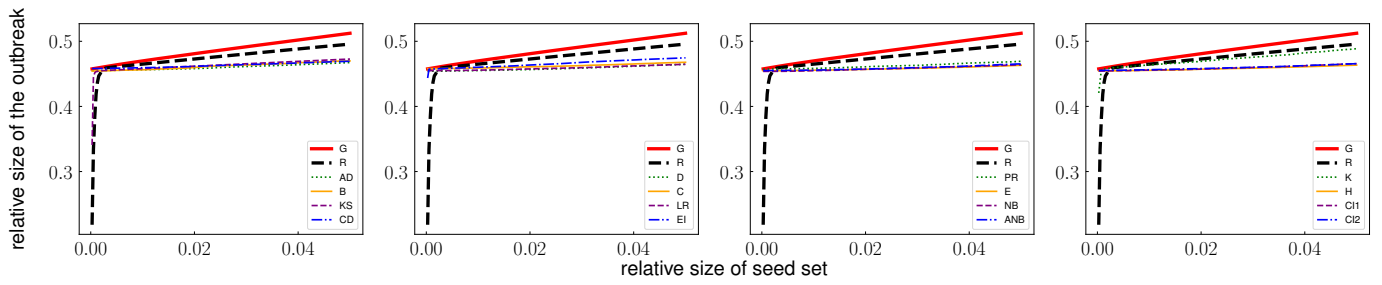

Figure 551: Brandeis -  $p=2.0p_c$

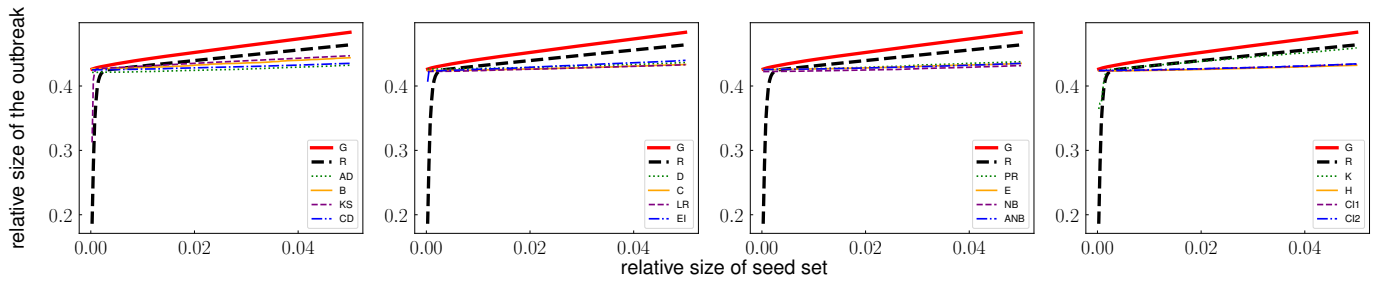

Figure 552: Howard -  $p=2.0p_c$

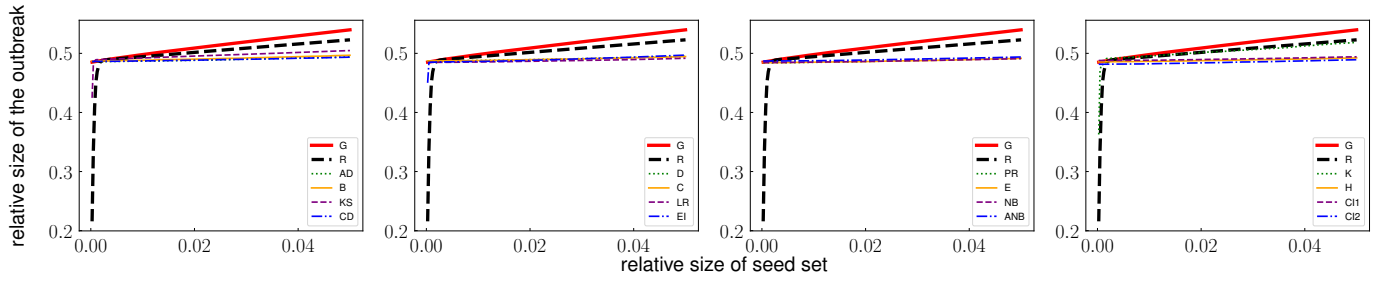

Figure 553: Rice -  $p=2.0p_c$

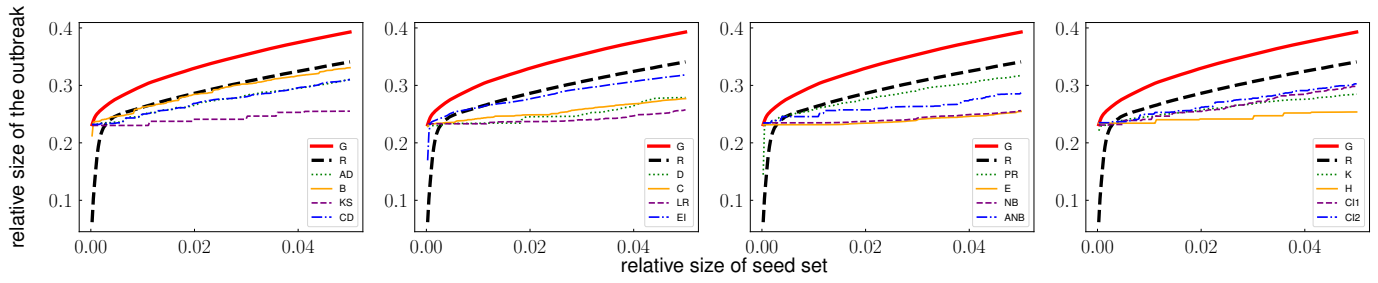

Figure 554: GR-QC, 1993-2003 -  $p=2.0p_c$

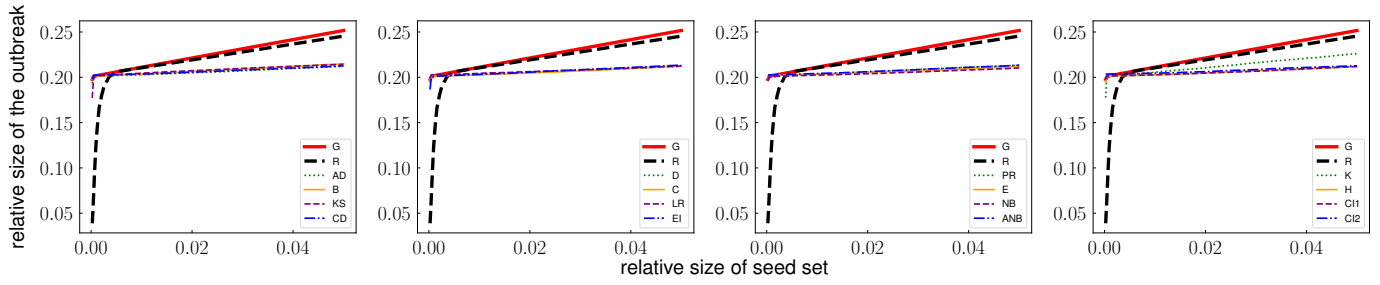

Figure 555: Tennis -  $p=2.0p_c$

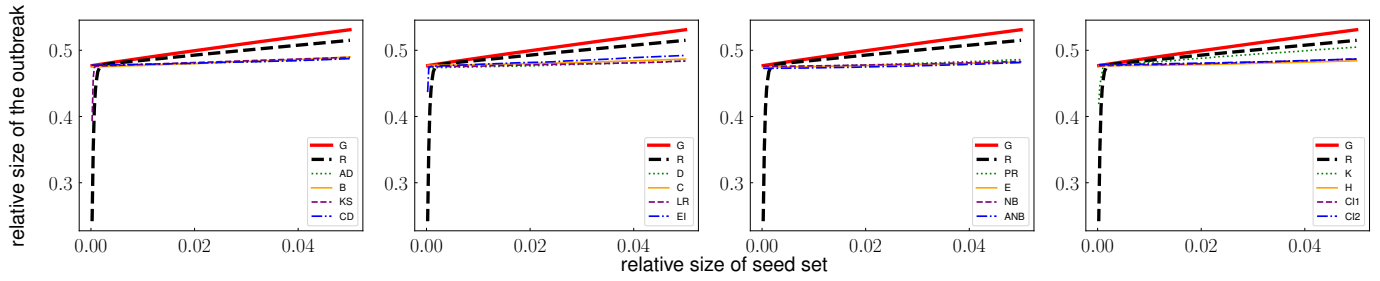

Figure 556: Rochester -  $p=2.0p_c$

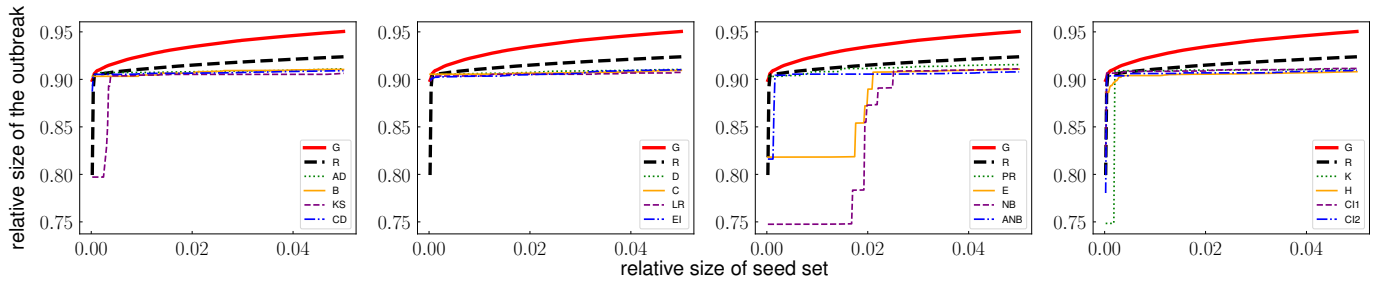

Figure 557: US Power grid -  $p=2.0p_c$





Figure 558: Lehigh -  $p=2.0p_c$



Figure 559: Johns Hopkins -  $p=2.0p_c$



Figure 560: HT09 -  $p=2.0p_c$



Figure 561: Wake -  $p=2.0p_c$



Figure 562: Hep-Th, 1995-1999 -  $p=2.0p_c$



Figure 563: Bitcoin OTC -  $p=2.0p_c$

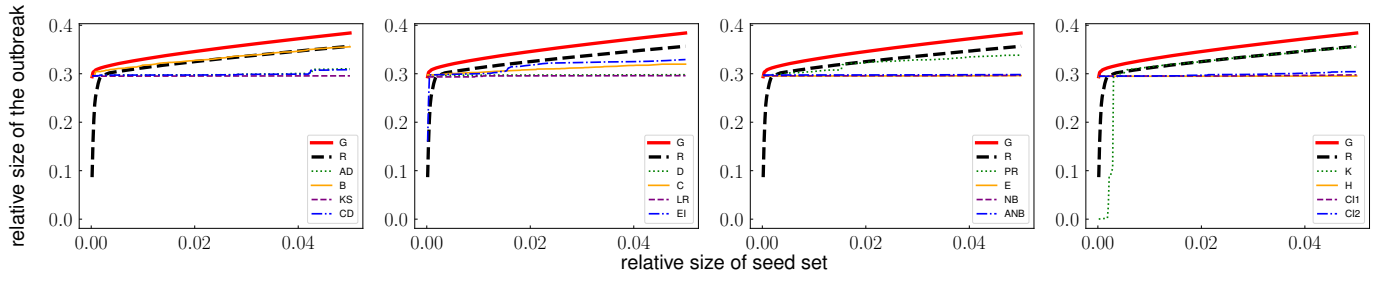

Figure 564: Reactome -  $p=2.0p_c$

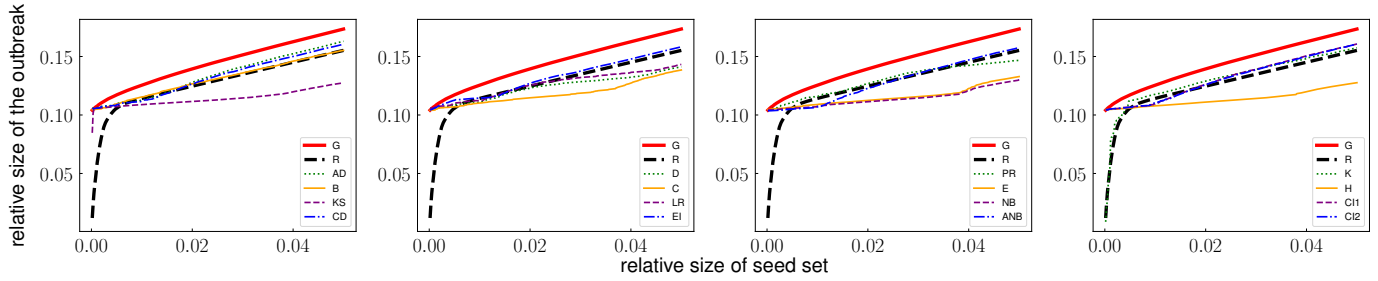

Figure 565: Jung -  $p=2.0p_c$

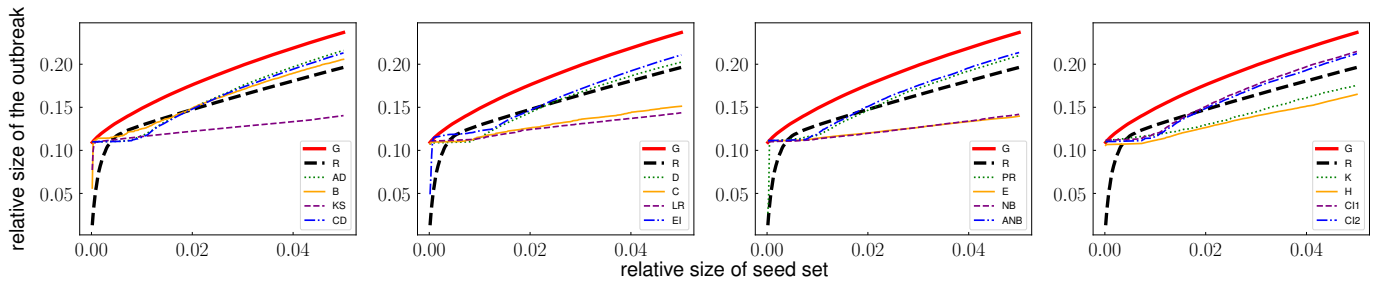

Figure 566: Gnutella, Aug. 8, 2002 -  $p=2.0p_c$

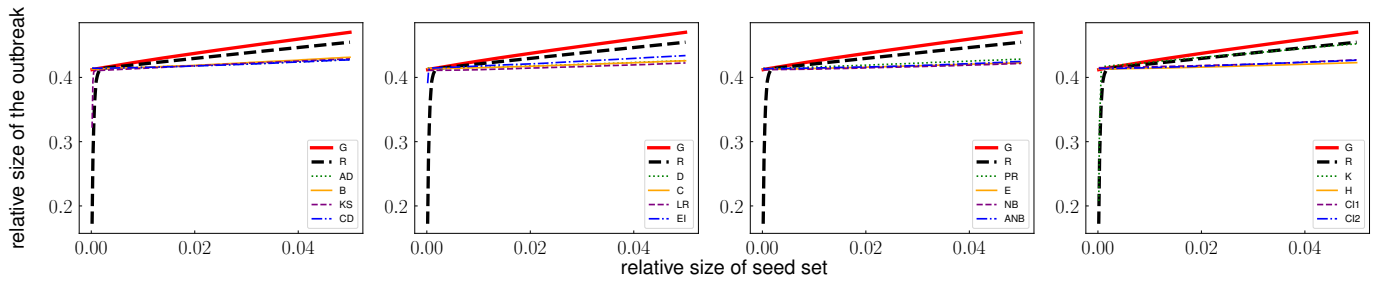

Figure 567: American -  $p=2.0p_c$

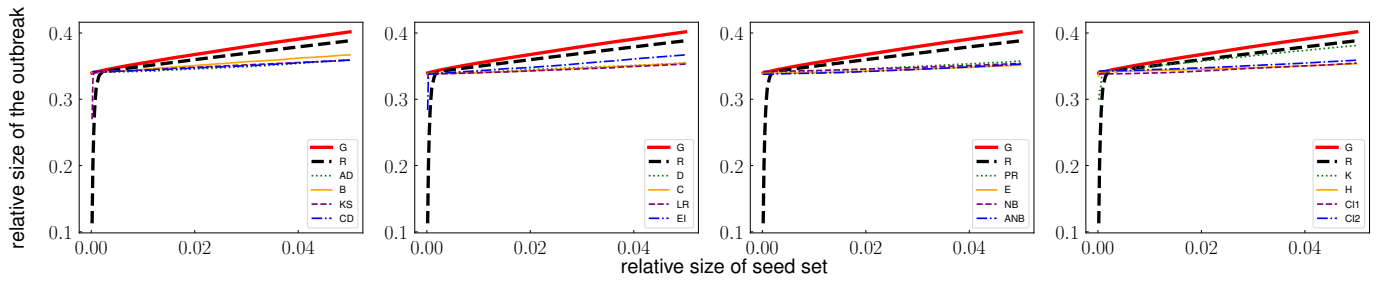

Figure 568: MIT -  $p=2.0p_c$

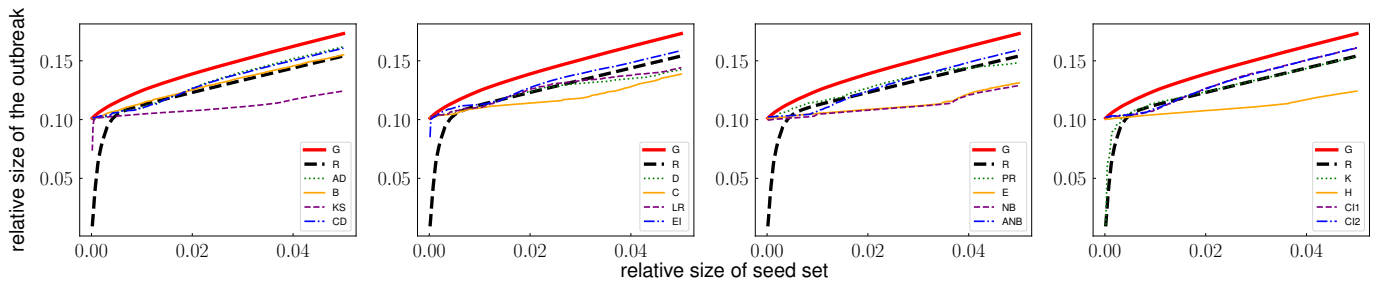

Figure 569: JDK -  $p=2.0p_c$



Figure 570: William -  $p=2.0p_c$



Figure 571: AS Oregon -  $p=2.0p_c$



Figure 572: UChicago -  $p=2.0p_c$

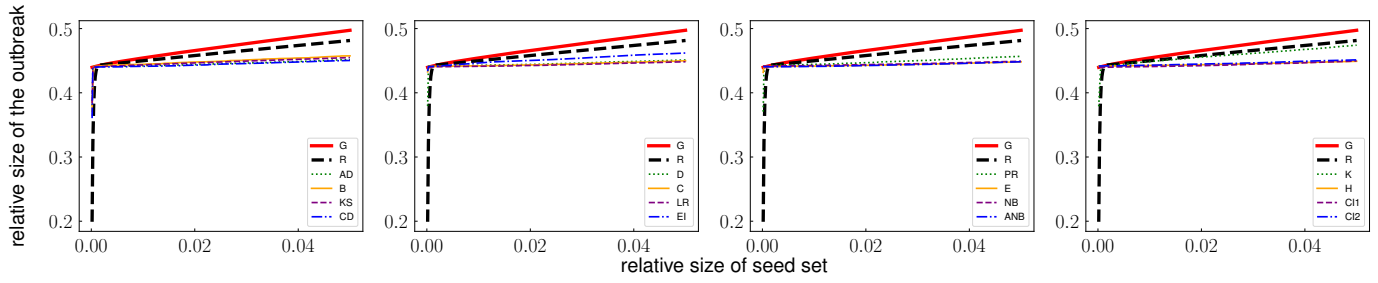

Figure 573: Princeton -  $p=2.0p_c$

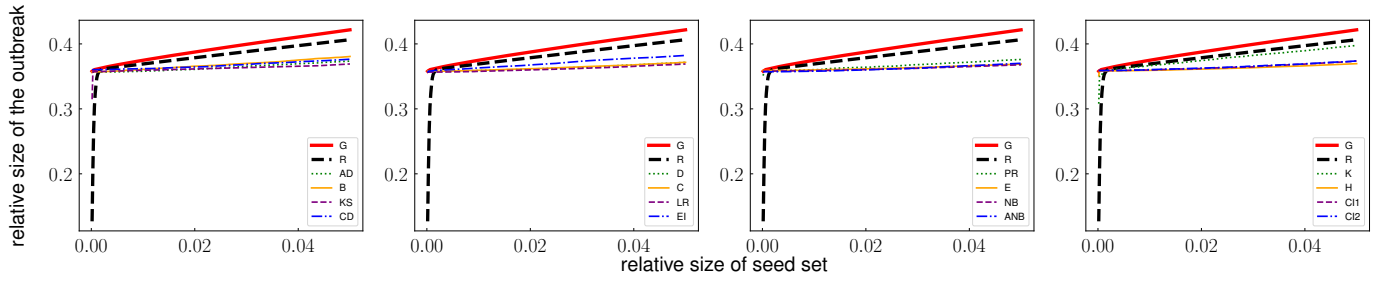

Figure 574: Carnegie -  $p=2.0p_c$

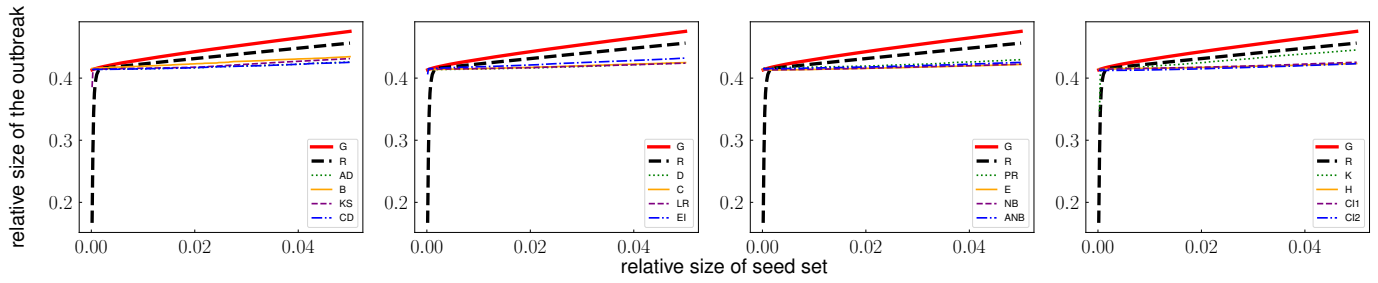

Figure 575: Tufts -  $p=2.0p_c$

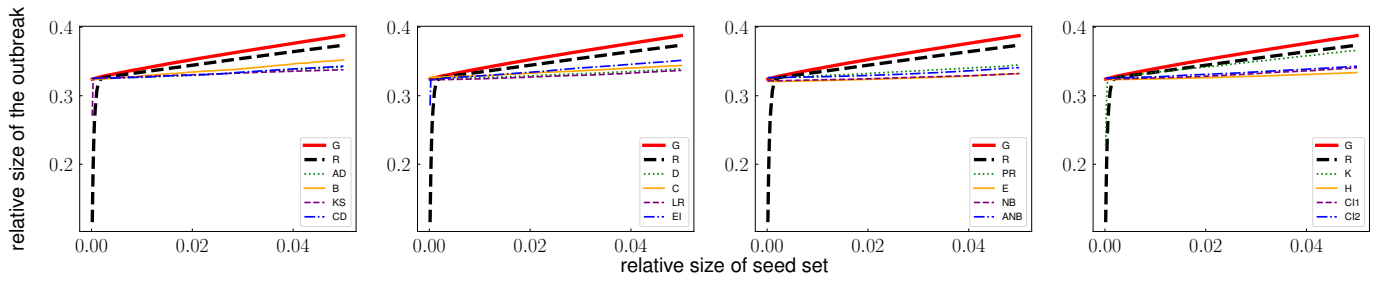

Figure 576: UC -  $p=2.0p_c$

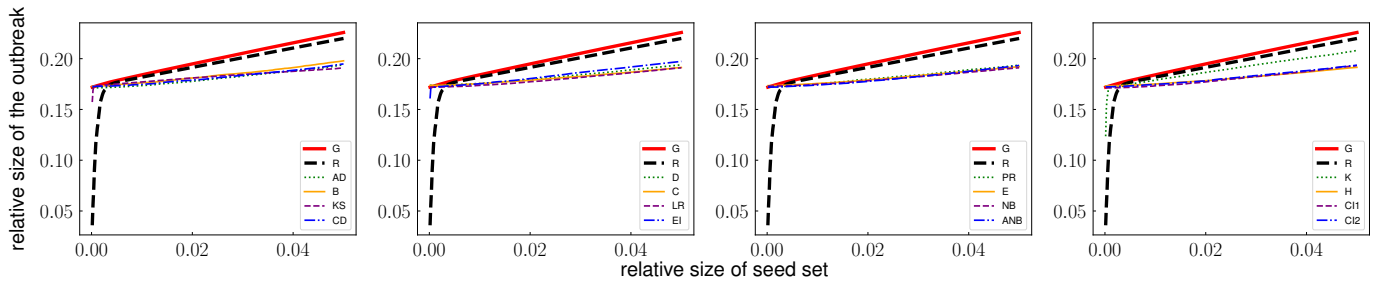

Figure 577: Wikipedia elections -  $p=2.0p_c$

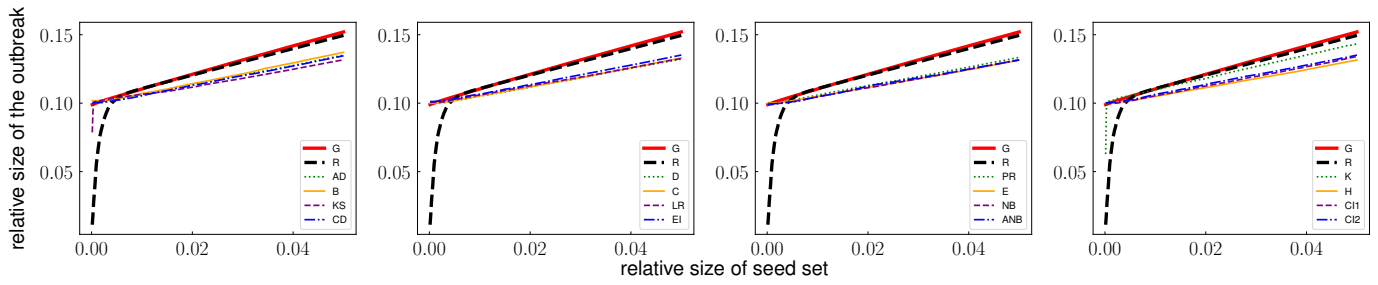

Figure 578: English -  $p=2.0p_c$

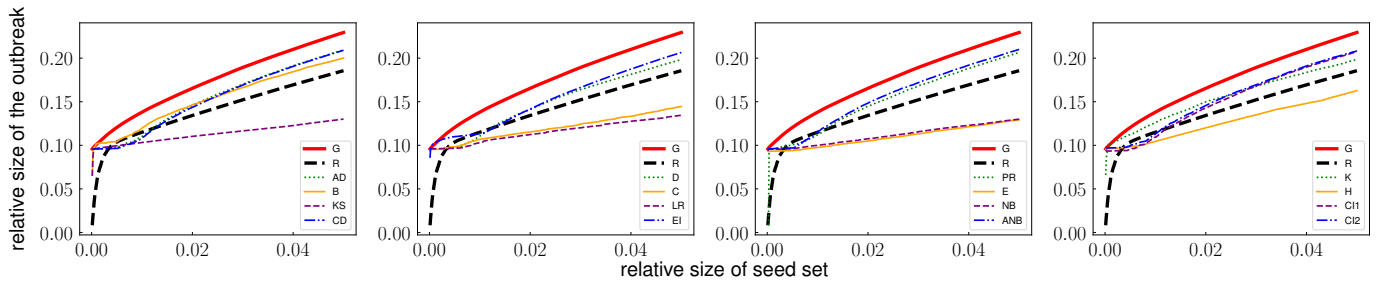

Figure 579: Gnutella, Aug. 9, 2002 -  $p=2.0p_c$

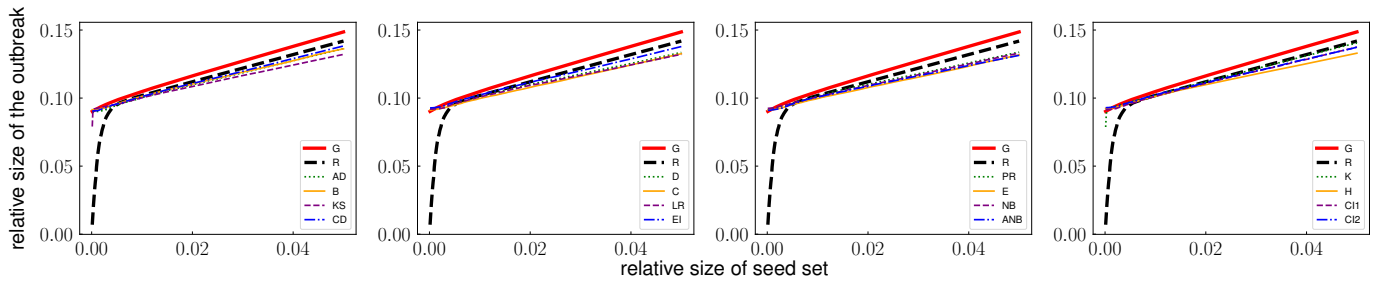

Figure 580: French -  $p=2.0p_c$

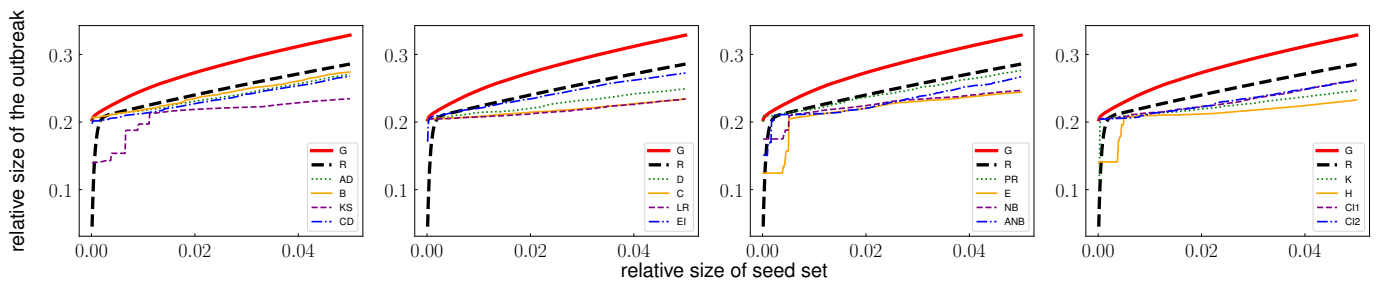

Figure 581: Hep-Th, 1993-2003 -  $p=2.0p_c$



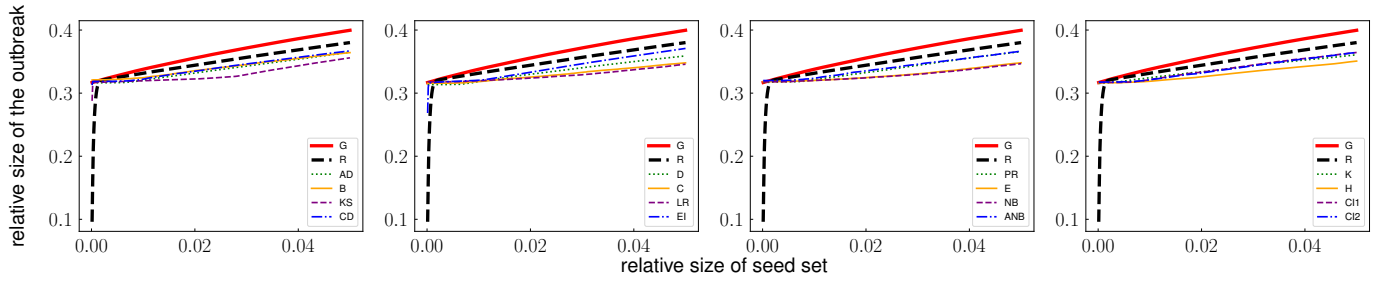

Figure 582: Gnutella, Aug. 6, 2002 -  $p=2.0p_c$

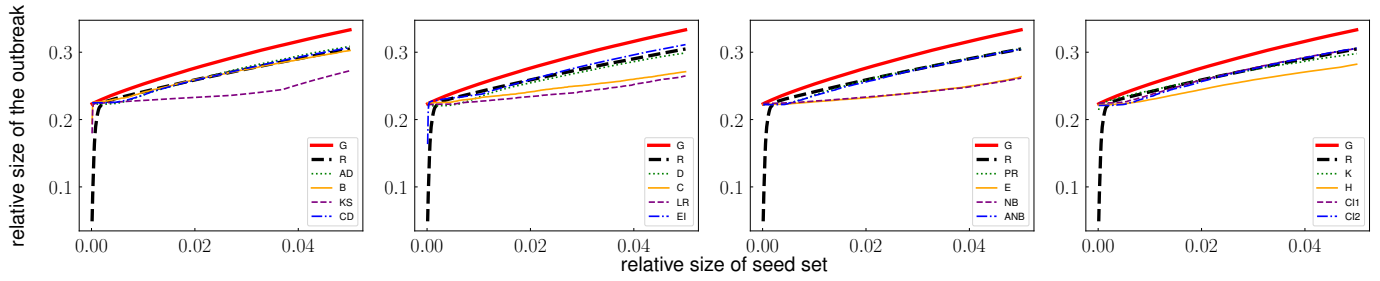

Figure 583: Gnutella, Aug. 5, 2002 -  $p=2.0p_c$

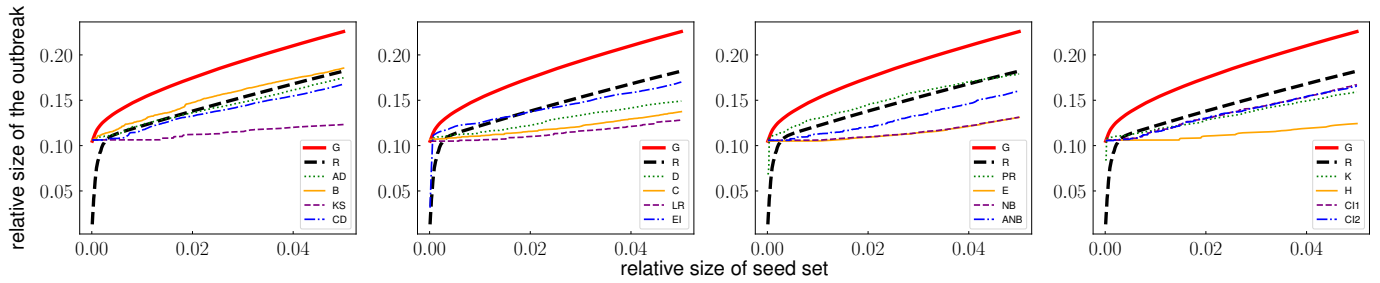

Figure 584: PGP -  $p=2.0p_c$



Figure 585: Gnutella, Aug. 4, 2002 -  $p=2.0p_c$



Figure 586: Hep-Ph, 1993-2003 -  $p=2.0p_c$



Figure 587: Spanish 1 -  $p=2.0p_c$

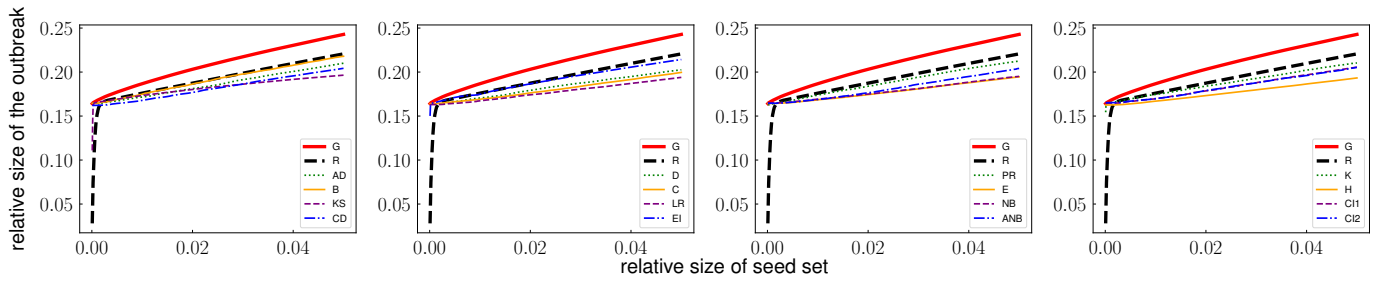

Figure 588: DBLP, citations -  $p=2.0p_c$

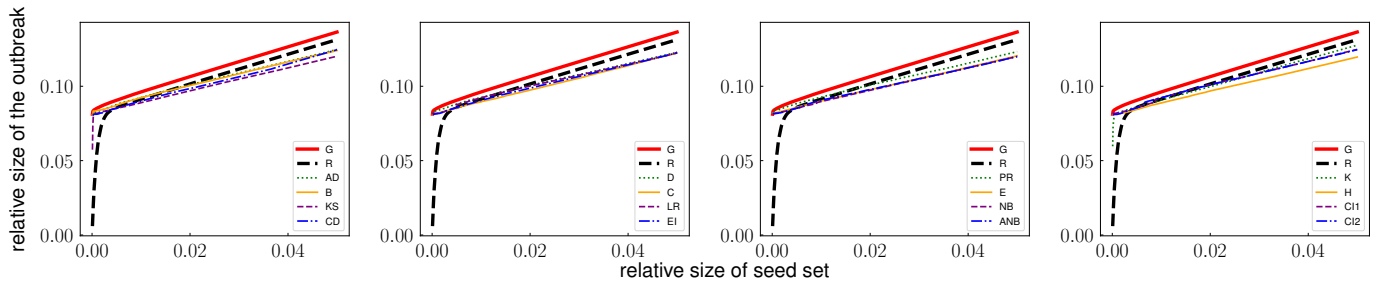

Figure 589: Spanish 2 -  $p=2.0p_c$

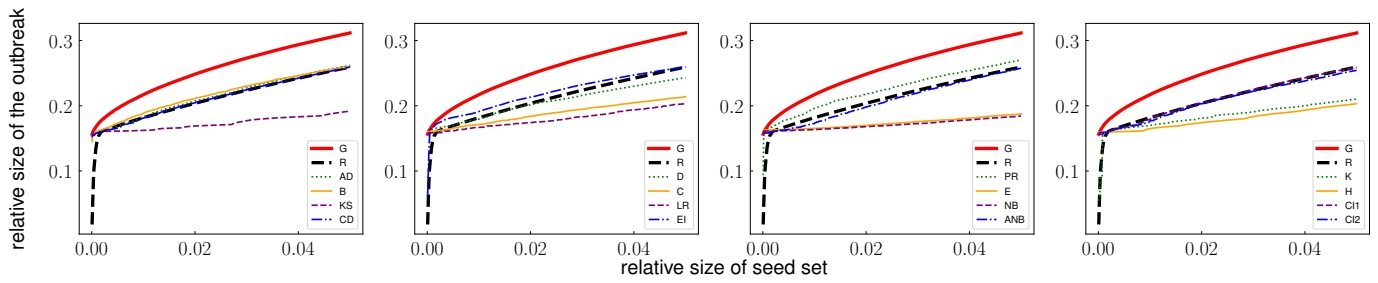

Figure 590: Cond-Mat, 1995-1999 -  $p=2.0p_c$

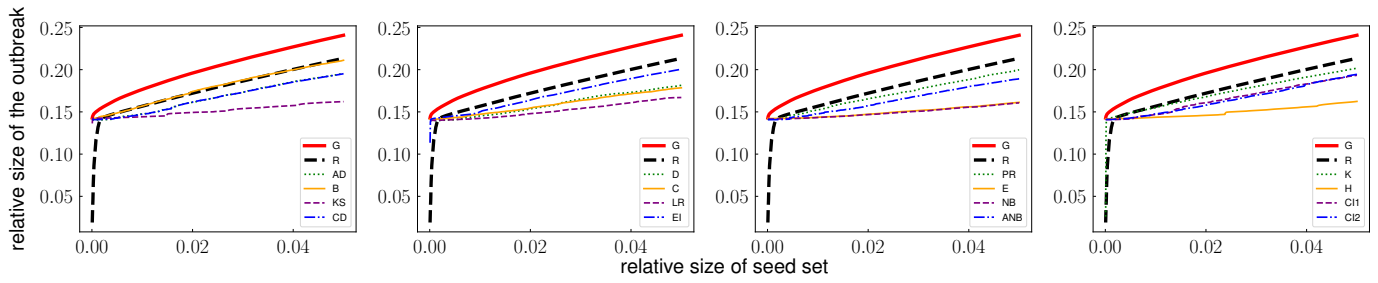

Figure 591: Astrophysics -  $p=2.0p_c$

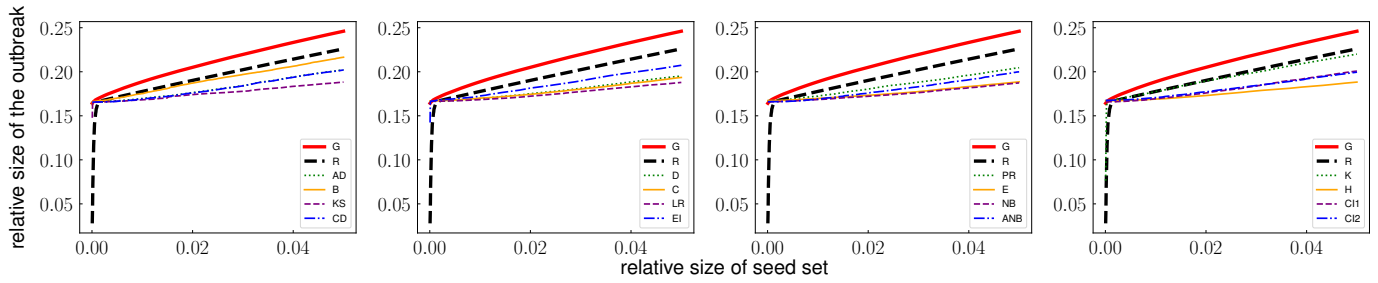

Figure 592: AstroPhys, 1993-2003 -  $p=2.0p_c$

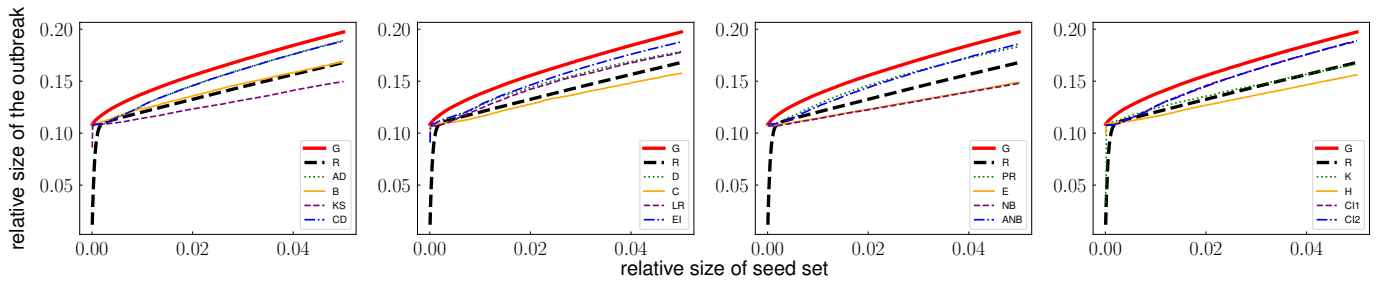

Figure 593: Marvel -  $p=2.0p_c$

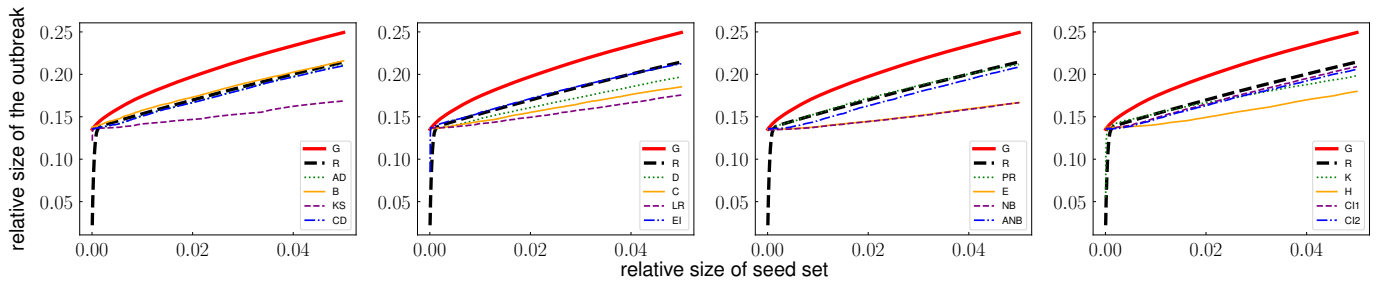

Figure 594: Cond-Mat, 1993-2003 -  $p=2.0p_c$

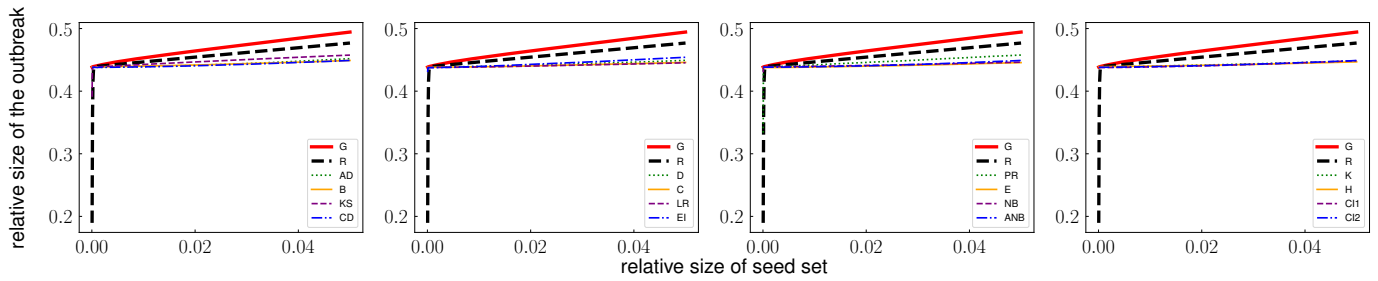

Figure 595: Gnutella, Aug. 25, 2002 -  $p=2.0p_c$

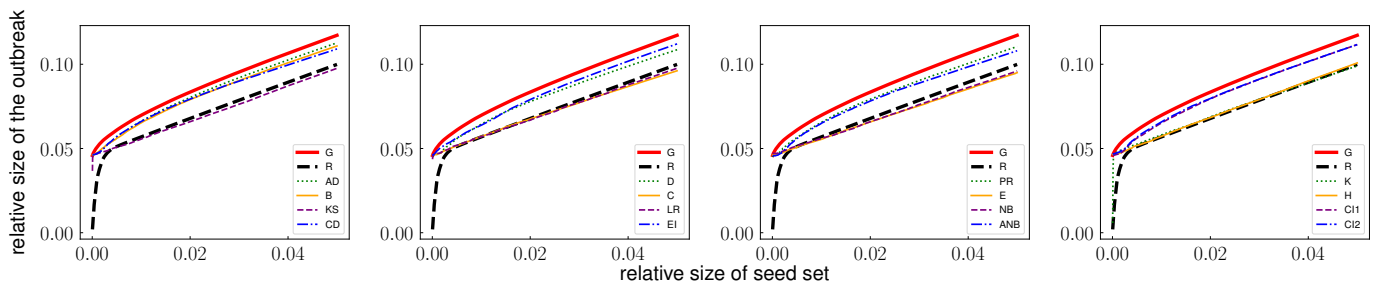

Figure 596: Internet -  $p=2.0p_c$



Figure 597: Thesaurus -  $p=2.0p_c$



Figure 598: Cora -  $p=2.0p_c$



Figure 599: AS Caida -  $p=2.0p_c$

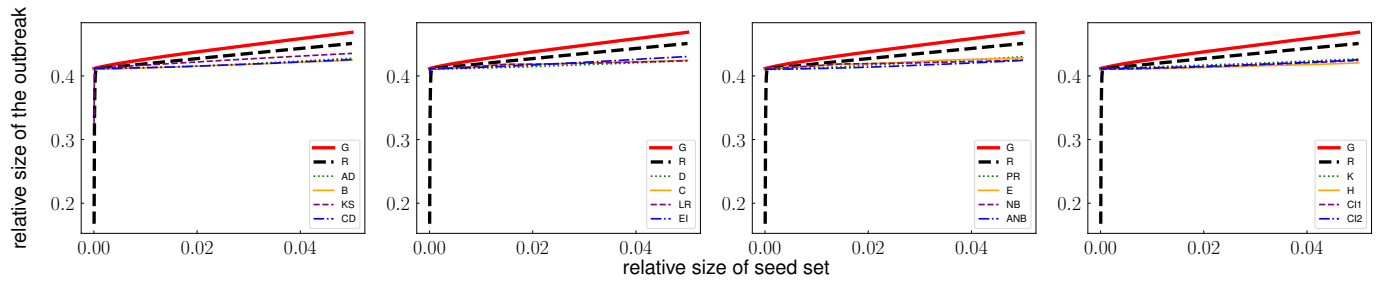

Figure 600: Gnutella, Aug. 24, 2002 -  $p=2.0p_c$

## References

- [1] L. A. Adamic and N. Glance, “The political blogosphere and the 2004 us election: divided they blog,” in *Proceedings of the 3rd international workshop on Link discovery*, pp. 36–43, ACM, 2005.
- [2] M. Girvan and M. E. Newman, “Community structure in social and biological networks,” *Proceedings of the National Academy of Sciences*, vol. 99, no. 12, pp. 7821–7826, 2002.
- [3] R. Milo, S. Itzkovitz, N. Kashtan, R. Levitt, S. Shen-Orr, I. Ayzenshtat, M. Sheffer, and U. Alon, “Superfamilies of evolved and designed networks,” *Science*, vol. 303, no. 5663, pp. 1538–1542, 2004.
- [4] J. Fournet and A. Barrat, “Contact patterns among high school students,” *PloS one*, vol. 9, no. 9, p. e107878, 2014.
- [5] R. Ulanowicz, C. Bondavalli, and M. Egnotovitch, “Network analysis of trophic dynamics in south florida ecosystem, fy 97: The florida bay ecosystem,” *Annual Report to the United States Geological Service Biological Resources Division Ref. No.[UMCES] CBL*, pp. 98–123, 1998.
- [6] J. Kunegis, “KONECT – The Koblenz Network Collection,” in *Proc. Int. Conf. on World Wide Web Companion*, pp. 1343–1350, 2013.
- [7] R. Michalski, S. Palus, and P. Kazienko, “Matching organizational structure and social network extracted from email communication,” in *Lecture Notes in Business Information Processing*, vol. 87, pp. 197–206, Springer Berlin Heidelberg, 2011.
- [8] N. D. Martinez, “Artifacts or attributes? effects of resolution on the little rock lake food web,” *Ecological Monographs*, pp. 367–392, 1991.
- [9] P. M. Gleiser and L. Danon, “Community structure in jazz,” *Advances in complex systems*, vol. 6, no. 04, pp. 565–573, 2003.
- [10] D. J. Watts and S. H. Strogatz, “Collective dynamics of small-worldnetworks,” *nature*, vol. 393, no. 6684, pp. 440–442, 1998.
- [11] M. E. Newman, “Finding community structure in networks using the eigenvectors of matrices,” *Physical review E*, vol. 74, no. 3, p. 036104, 2006.
- [12] L. Isella, J. Stehlé, A. Barrat, C. Cattuto, J.-F. Pinton, and W. Van den Broeck, “What’s in a crowd? analysis of face-to-face behavioral networks,” *Journal of theoretical biology*, vol. 271, no. 1, pp. 166–180, 2011.
- [13] V. Colizza, R. Pastor-Satorras, and A. Vespignani, “Reaction–diffusion processes and metapopulation models in heterogeneous networks,” *Nature Physics*, vol. 3, no. 4, pp. 276–282, 2007.



- [14] R. Milo, S. Shen-Orr, S. Itzkovitz, N. Kashtan, D. Chklovskii, and U. Alon, “Network motifs: simple building blocks of complex networks,” *Science*, vol. 298, no. 5594, pp. 824–827, 2002.
- [15] A. L. Traud, P. J. Mucha, and M. A. Porter, “Social structure of Facebook networks,” *Phys. A*, vol. 391, pp. 4165–4180, Aug 2012.
- [16] A. L. Traud, E. D. Kelsic, P. J. Mucha, and M. A. Porter, “Comparing community structure to characteristics in online collegiate social networks,” *SIAM Rev.*, vol. 53, no. 3, pp. 526–543, 2011.
- [17] R. A. Rossi and N. K. Ahmed, “The network data repository with interactive graph analytics and visualization,” in *Proceedings of the Twenty-Ninth AAAI Conference on Artificial Intelligence*, 2015.
- [18] M. Helmstaedter, K. L. Briggman, S. C. Turaga, V. Jain, H. S. Seung, and W. Denk, “Connectomic reconstruction of the inner plexiform layer in the mouse retina,” *Nature*, vol. 500, no. 7461, p. 168, 2013.
- [19] A. Clauset, E. Tucker, and M. Sainz, “The colorado index of complex networks,” 2016.
- [20] R. Guimera, L. Danon, A. Diaz-Guilera, F. Giralt, and A. Arenas, “Self-similar community structure in a network of human interactions,” *Physical review E*, vol. 68, no. 6, p. 065103, 2003.
- [21] T. Opsahl and P. Panzarasa, “Clustering in weighted networks,” *Social networks*, vol. 31, no. 2, pp. 155–163, 2009.
- [22] D. Bu, Y. Zhao, L. Cai, H. Xue, X. Zhu, H. Lu, J. Zhang, S. Sun, L. Ling, N. Zhang, *et al.*, “Topological structure analysis of the protein–protein interaction network in budding yeast,” *Nucleic acids research*, vol. 31, no. 9, pp. 2443–2450, 2003.
- [23] J. Moody, “Peer influence groups: identifying dense clusters in large networks,” *Social Networks*, vol. 23, no. 4, pp. 261–283, 2001.
- [24] T. Opsahl, F. Agneessens, and J. Skvoretz, “Node centrality in weighted networks: Generalizing degree and shortest paths,” *Social Networks*, vol. 32, no. 3, pp. 245–251, 2010.
- [25] S. Kumar, F. Spezzano, V. Subrahmanian, and C. Faloutsos, “Edge weight prediction in weighted signed networks,” in *Data Mining (ICDM), 2016 IEEE 16th International Conference on*, pp. 221–230, IEEE, 2016.
- [26] S. Kumar, B. Hooi, D. Makhija, M. Kumar, C. Faloutsos, and V. Subrahmanian, “Rev2: Fraudulent user prediction in rating platforms,” in *Proceedings of the Eleventh ACM International Conference on Web Search and Data Mining*, pp. 333–341, ACM, 2018.

- [27] J. Leskovec and A. Krevl, “SNAP Datasets: Stanford large network dataset collection.” <http://snap.stanford.edu/data>, June 2014.
- [28] J. Leskovec, J. Kleinberg, and C. Faloutsos, “Graph evolution: Densification and shrinking diameters,” *ACM Transactions on Knowledge Discovery from Data (TKDD)*, vol. 1, no. 1, p. 2, 2007.
- [29] F. Radicchi, “Who is the best player ever? a complex network analysis of the history of professional tennis,” *PloS one*, vol. 6, no. 2, p. e17249, 2011.
- [30] M. E. Newman, “The structure of scientific collaboration networks,” *Proceedings of the National Academy of Sciences*, vol. 98, no. 2, pp. 404–409, 2001.
- [31] G. Joshi-Tope, M. Gillespie, I. Vastrik, P. D’Eustachio, E. Schmidt, B. de Bono, B. Jassal, G. Gopinath, G. Wu, L. Matthews, *et al.*, “Reactome: a knowledgebase of biological pathways,” *Nucleic acids research*, vol. 33, no. suppl 1, pp. D428–D432, 2005.
- [32] L. Šubelj and M. Bajec, “Software systems through complex networks science: Review, analysis and applications,” in *Proceedings of the First International Workshop on Software Mining*, pp. 9–16, ACM, 2012.
- [33] M. Ripeanu, I. Foster, and A. Iamnitchi, “Mapping the gnutella network: Properties of large-scale peer-to-peer systems and implications for system design,” *arXiv preprint cs/0209028*, 2002.
- [34] J. Leskovec, J. Kleinberg, and C. Faloutsos, “Graphs over time: densification laws, shrinking diameters and possible explanations,” in *Proceedings of the eleventh ACM SIGKDD international conference on Knowledge discovery in data mining*, pp. 177–187, ACM, 2005.
- [35] J. Leskovec, D. Huttenlocher, and J. Kleinberg, “Signed networks in social media,” in *Proceedings of the SIGCHI conference on human factors in computing systems*, pp. 1361–1370, ACM, 2010.
- [36] J. Leskovec, D. Huttenlocher, and J. Kleinberg, “Predicting positive and negative links in online social networks,” in *Proceedings of the 19th international conference on World wide web*, pp. 641–650, ACM, 2010.
- [37] M. Boguñá, R. Pastor-Satorras, A. Díaz-Guilera, and A. Arenas, “Models of social networks based on social distance attachment,” *Physical Review E*, vol. 70, no. 5, p. 056122, 2004.
- [38] M. Ley, “The dblp computer science bibliography: Evolution, research issues, perspectives,” in *String Processing and Information Retrieval*, pp. 1–10, Springer, 2002.
- [39] R. Alberich, J. Miro-Julia, and F. Rosselló, “Marvel universe looks almost like a real social network,” *arXiv preprint cond-mat/0202174*, 2002.

- [40] G. R. Kiss, C. Armstrong, R. Milroy, and J. Piper, “An associative thesaurus of english and its computer analysis,” *The computer and literary studies*, pp. 153–165, 1973.
- [41] L. Šubelj and M. Bajec, “Model of complex networks based on citation dynamics,” in *Proceedings of the 22nd international conference on World Wide Web companion*, pp. 527–530, International World Wide Web Conferences Steering Committee, 2013.
